# Supplementary material for: Identification of microRNAs Involved in the Host Response to Enterovirus 71 Infection by a Deep Sequencing Approach
Source: Hindawi journal article supplement (doi:10.1155/2010/425939), 2010-01-01
Supplement: f1 [file 425939.f1.xls]

## Sheet: UP
hsa-mir-636		hsa-mir-619		hsa-mir-1302		hsa-mir-1273		hsa-mir-1290		hsa-mir-1268		hsa-mir-1178		hsa-mir-1246		hsa-mir-566		hsa-mir-1226		hsa-mir-635		hsa-mir-627		hsa-mir-518c		hsa-mir-1185-2		hsa-mir-1289-1		hsa-mir-539		hsa-mir-1247		hsa-mir-1272		hsa-mir-324		hsa-mir-744		hsa-mir-541		hsa-mir-1254		hsa-mir-421		hsa-mir-1237		hsa-mir-320c
Target gene	Gene name	Target gene	Gene name	Target gene	Gene name	Target gene	Gene name	Target gene	Gene name	Target gene	Gene name	Target gene		Target gene	Gene name	Target gene	Gene name	Target gene	Gene name	Target gene	Gene name	Target gene	Gene name	Target gene	Gene name	Target gene	Gene name	Target gene	Gene name	Target gene	Gene name	Target gene	Gene name	Target gene	Gene name	Target gene	Gene name	Target gene	Gene name	Target gene	Gene name	Target gene	Gene name	Target gene	Gene name	Target gene	Gene name	Target gene	Gene name
ONECUT2	one cut homeobox 2	OGT	O-linked N-acetylglucosamine (GlcNAc) transferase (UDP-N-acetylglucosamine:polypeptide-N-acetylglucosaminyl transferase)	GCET2	germinal center expressed transcript 2	NAT13	N-acetyltransferase 13	EHHADH	enoyl-Coenzyme A, hydratase/3-hydroxyacyl Coenzyme A dehydrogenase	ZNF713	zinc finger protein 713	ZZZ3	zinc finger, ZZ-type containing 3	FAM53C	family with sequence similarity 53, member C	KIAA1219	KIAA1219	2010-03-09	membrane-associated ring finger (C3HC4) 9	TOP2A	topoisomerase (DNA) II alpha 170kDa	ARL5B	ADP-ribosylation factor-like 5B	EGR1	early growth response 1	DISC1	disrupted in schizophrenia 1	MCL1	myeloid cell leukemia sequence 1 (BCL2-related)	HS6ST3	heparan sulfate 6-O-sulfotransferase 3	MYCBP2	MYC binding protein 2	TCERG1L	transcription elongation regulator 1-like	FAM155B	family with sequence similarity 155, member B	KCNAB3	potassium voltage-gated channel, shaker-related subfamily, beta member 3	TMEM90A	transmembrane protein 90A	C2orf67	chromosome 2 open reading frame 67	AFF4	AF4/FMR2 family, member 4	C8orf59	chromosome 8 open reading frame 59	ONECUT2	one cut homeobox 2
PHC3	polyhomeotic homolog 3 (Drosophila)	MDGA2	MAM domain containing glycosylphosphatidylinositol anchor 2	ONECUT2	one cut homeobox 2	DYRK2	dual-specificity tyrosine-(Y)-phosphorylation regulated kinase 2	RTKN2	rhotekin 2	SOX12	SRY (sex determining region Y)-box 12	GLS	glutaminase	CREBL2	cAMP responsive element binding protein-like 2	FHL1	four and a half LIM domains 1	PPFIBP1	PTPRF interacting protein, binding protein 1 (liprin beta 1)	FAM120C	family with sequence similarity 120C	MAP2K4	mitogen-activated protein kinase kinase 4	WDR1	WD repeat domain 1	SGCD	sarcoglycan, delta (35kDa dystrophin-associated glycoprotein)	BRD4	bromodomain containing 4	ZFX	zinc finger protein, X-linked	RCC2	regulator of chromosome condensation 2	ARHGAP21	Rho GTPase activating protein 21	MDGA1	MAM domain containing glycosylphosphatidylinositol anchor 1	SH3BGRL3	SH3 domain binding glutamic acid-rich protein like 3	PELI3	pellino homolog 3 (Drosophila)	RBPJL	recombination signal binding protein for immunoglobulin kappa J region-like	TOMM70A	translocase of outer mitochondrial membrane 70 homolog A (S. cerevisiae)	LOC196993	hypothetical protein LOC196993	C12orf36	chromosome 12 open reading frame 36
CETN2	centrin, EF-hand protein, 2	ACVR2B	activin A receptor, type IIB	ENSA	endosulfine alpha	USP10	ubiquitin specific peptidase 10	ONECUT2	one cut homeobox 2	HPD	4-hydroxyphenylpyruvate dioxygenase	RABL3	RAB, member of RAS oncogene family-like 3	RTKN2	rhotekin 2	CABP1	calcium binding protein 1	MAT2A	methionine adenosyltransferase II, alpha	METTL8	methyltransferase like 8	C1orf27	chromosome 1 open reading frame 27	TSN	translin	SLC46A3	solute carrier family 46, member 3	P53AIP1	p53-regulated apoptosis-inducing protein 1	PAPD5	PAP associated domain containing 5	PHF21A	PHD finger protein 21A	AKAP6	A kinase (PRKA) anchor protein 6	MLL2	myeloid/lymphoid or mixed-lineage leukemia 2	KLC2	kinesin light chain 2	COTL1	coactosin-like 1 (Dictyostelium)	PPP3CB	protein phosphatase 3 (formerly 2B), catalytic subunit, beta isoform	ONECUT2	one cut homeobox 2	ANKRD13C	ankyrin repeat domain 13C	KITLG	KIT ligand
TPD52	tumor protein D52	TNKS2	tankyrase, TRF1-interacting ankyrin-related ADP-ribose polymerase 2	ATRX	alpha thalassemia/mental retardation syndrome X-linked (RAD54 homolog, S. cerevisiae)	KRT3	keratin 3	CBFA2T3	core-binding factor, runt domain, alpha subunit 2; translocated to, 3	CAMK2G	calcium/calmodulin-dependent protein kinase (CaM kinase) II gamma	TMEM32	transmembrane protein 32	SCN3A	sodium channel, voltage-gated, type III, alpha subunit	PSKH1	protein serine kinase H1	NRP1	neuropilin 1	NARG1	NMDA receptor regulated 1	TRIM9	tripartite motif-containing 9	ZNF282	zinc finger protein 282	UROD	uroporphyrinogen decarboxylase	CCDC71	coiled-coil domain containing 71	SNAP29	synaptosomal-associated protein, 29kDa	RARA	retinoic acid receptor, alpha	SETD8	SET domain containing (lysine methyltransferase) 8	SH3TC2	SH3 domain and tetratricopeptide repeats 2	LRP3	low density lipoprotein receptor-related protein 3	STK38	serine/threonine kinase 38	HIPK2	homeodomain interacting protein kinase 2	PRKAA2	protein kinase, AMP-activated, alpha 2 catalytic subunit	C7orf42	chromosome 7 open reading frame 42	ABHD13	abhydrolase domain containing 13
GLCE	glucuronic acid epimerase	THRB	thyroid hormone receptor, beta (erythroblastic leukemia viral (v-erb-a) oncogene homolog 2, avian)	VSNL1	visinin-like 1	CPNE4	copine IV	JARID1A	jumonji, AT rich interactive domain 1A	MMEL1	membrane metallo-endopeptidase-like 1	SRPR	signal recognition particle receptor ('docking protein')	BRWD1	bromodomain and WD repeat domain containing 1	C1QL4	complement component 1, q subcomponent-like 4	DLG2	discs, large homolog 2, chapsyn-110 (Drosophila)	IGFBP4	insulin-like growth factor binding protein 4	HIRIP3	HIRA interacting protein 3	HMP19	HMP19 protein	TMF1	TATA element modulatory factor 1	XRN1	5'-3' exoribonuclease 1	PIP3-E	phosphoinositide-binding protein PIP3-E	CPEB4	cytoplasmic polyadenylation element binding protein 4	EML4	echinoderm microtubule associated protein like 4	HELZ	helicase with zinc finger	GRIN2D	glutamate receptor, ionotropic, N-methyl D-aspartate 2D	LSM12	LSM12 homolog (S. cerevisiae)	PPARA	peroxisome proliferator-activated receptor alpha	AFF3	AF4/FMR2 family, member 3	EXOC5	exocyst complex component 5	RP11-35N6.1	plasticity related gene 3
ECOP	EGFR-coamplified and overexpressed protein	C10orf26	chromosome 10 open reading frame 26	ZRANB1	zinc finger, RAN-binding domain containing 1	PAN3	PAN3 polyA specific ribonuclease subunit homolog (S. cerevisiae)	STK17A	serine/threonine kinase 17a	NXF1	nuclear RNA export factor 1	RIMBP2	RIMS binding protein 2	REPS2	RALBP1 associated Eps domain containing 2	PDSS2	prenyl (decaprenyl) diphosphate synthase, subunit 2	LL22NC03-75B3.6	KIAA1644 protein	BTBD1	BTB (POZ) domain containing 1	SCN3B	sodium channel, voltage-gated, type III, beta	ZNF608	zinc finger protein 608	MAPK14	mitogen-activated protein kinase 14	LMO4	LIM domain only 4	GABPB2	GA binding protein transcription factor, beta subunit 2	CREBZF	CREB/ATF bZIP transcription factor	NCKAP1L	NCK-associated protein 1-like	ZBTB7B	zinc finger and BTB domain containing 7B	SPTBN4	spectrin, beta, non-erythrocytic 4	EIF2C1	eukaryotic translation initiation factor 2C, 1	CDK6	cyclin-dependent kinase 6	PAPD5	PAP associated domain containing 5	ERBB3	v-erb-b2 erythroblastic leukemia viral oncogene homolog 3 (avian)	RIT1	Ras-like without CAAX 1
RNF165	ring finger protein 165	FOXG1	forkhead box G1	SLC35E3	solute carrier family 35, member E3	CNOT2	CCR4-NOT transcription complex, subunit 2	FAM19A5	family with sequence similarity 19 (chemokine (C-C motif)-like), member A5	PVRL1	poliovirus receptor-related 1 (herpesvirus entry mediator C)	TGFA	transforming growth factor, alpha	AKAP2	A kinase (PRKA) anchor protein 2	RTN2	reticulon 2	DCLK3	doublecortin-like kinase 3	RUNX2	runt-related transcription factor 2	BIVM	basic, immunoglobulin-like variable motif containing	TEAD3	TEA domain family member 3	CUGBP2	CUG triplet repeat, RNA binding protein 2	JARID1B	jumonji, AT rich interactive domain 1B	DCX	doublecortex; lissencephaly, X-linked (doublecortin)			GATA3	GATA binding protein 3	DYNC1LI2	dynein, cytoplasmic 1, light intermediate chain 2	VPS37D	vacuolar protein sorting 37 homolog D (S. cerevisiae)	RAB11FIP1	RAB11 family interacting protein 1 (class I)	C13orf31	chromosome 13 open reading frame 31	ZFP106	zinc finger protein 106 homolog (mouse)	ENAH	enabled homolog (Drosophila)	hCG_18385	similar to cAMP-regulated phosphoprotein
ARID4B	AT rich interactive domain 4B (RBP1-like)	GAL3ST3	galactose-3-O-sulfotransferase 3	TMEM106B	transmembrane protein 106B	ZC3H7B	zinc finger CCCH-type containing 7B	ANKRD13C	ankyrin repeat domain 13C	HRH3	histamine receptor H3	SLC45A3	solute carrier family 45, member 3	PALM2-AKAP2	PALM2-AKAP2	ZNF282	zinc finger protein 282	RRP1B	ribosomal RNA processing 1 homolog B (S. cerevisiae)	UBE2J1	ubiquitin-conjugating enzyme E2, J1 (UBC6 homolog, yeast)	RGMB	RGM domain family, member B	RAP1B	RAP1B, member of RAS oncogene family	DMXL1	Dmx-like 1	EFNA5	ephrin-A5	RWDD4A	RWD domain containing 4A			DIAPH2	diaphanous homolog 2 (Drosophila)	SYT12	synaptotagmin XII	ZNF385A	zinc finger protein 385A	EPHA8	EPH receptor A8	PSMD10	proteasome (prosome, macropain) 26S subunit, non-ATPase, 10	SCGB2A1	secretoglobin, family 2A, member 1	CLCN5	chloride channel 5 (nephrolithiasis 2, X-linked, Dent disease)	SLC5A3	solute carrier family 5 (inositol transporters), member 3
LYSMD3	LysM, putative peptidoglycan-binding, domain containing 3	CD47	CD47 molecule	CTBP2	C-terminal binding protein 2	FOXP4	forkhead box P4	KCNAB1	potassium voltage-gated channel, shaker-related subfamily, beta member 1	FJX1	four jointed box 1 (Drosophila)	TMEM184B	transmembrane protein 184B	HS3ST1	heparan sulfate (glucosamine) 3-O-sulfotransferase 1	ST7L	suppression of tumorigenicity 7 like	TRAF5	TNF receptor-associated factor 5	PTPRM	protein tyrosine phosphatase, receptor type, M	TMEM16F	transmembrane protein 16F	LOC26010	viral DNA polymerase-transactivated protein 6	RP4-692D3.1	hypothetical protein LOC728621	XPR1	xenotropic and polytropic retrovirus receptor	ST8SIA1	ST8 alpha-N-acetyl-neuraminide alpha-2,8-sialyltransferase 1			LYRM7	Lyrm7 homolog (mouse)	BRWD1	bromodomain and WD repeat domain containing 1	UBE2L3	ubiquitin-conjugating enzyme E2L 3	WDR82	WD repeat domain 82	RMND5A	required for meiotic nuclear division 5 homolog A (S. cerevisiae)	KIAA1370	KIAA1370	RGS1	regulator of G-protein signaling 1	SH2B3	SH2B adaptor protein 3
AP3M1	adaptor-related protein complex 3, mu 1 subunit	ARNT	aryl hydrocarbon receptor nuclear translocator	DOCK3	dedicator of cytokinesis 3	C10orf114	chromosome 10 open reading frame 114	SDHC	succinate dehydrogenase complex, subunit C, integral membrane protein, 15kDa			MAGI2	membrane associated guanylate kinase, WW and PDZ domain containing 2	CCNG2	cyclin G2			GAS7	growth arrest-specific 7	UBE2D3	ubiquitin-conjugating enzyme E2D 3 (UBC4/5 homolog, yeast)	ROM1	retinal outer segment membrane protein 1	hCG_1757335	hCG1757335	UVRAG	UV radiation resistance associated gene	TMEM35	transmembrane protein 35	FNIP1	folliculin interacting protein 1			C10orf55	chromosome 10 open reading frame 55	KIAA1949	KIAA1949	ARL4C	ADP-ribosylation factor-like 4C	FCHSD1	FCH and double SH3 domains 1	FAM160B2	family with sequence similarity 160, member B2	STRN3	striatin, calmodulin binding protein 3	CNNM1	cyclin M1	OBFC2A	oligonucleotide/oligosaccharide-binding fold containing 2A
SLC1A2	solute carrier family 1 (glial high affinity glutamate transporter), member 2	CALM2	calmodulin 2 (phosphorylase kinase, delta)	CALM3	calmodulin 3 (phosphorylase kinase, delta)	NUFIP2	nuclear fragile X mental retardation protein interacting protein 2	SORCS1	sortilin-related VPS10 domain containing receptor 1			AFF4	AF4/FMR2 family, member 4	ZNF323	zinc finger protein 323			PLCXD3	phosphatidylinositol-specific phospholipase C, X domain containing 3	SASH1	SAM and SH3 domain containing 1	USP9X	ubiquitin specific peptidase 9, X-linked	WNK1	WNK lysine deficient protein kinase 1	MIZF	MBD2-interacting zinc finger	FAM165B	family with sequence similarity 165, member B	BACH2	BTB and CNC homology 1, basic leucine zipper transcription factor 2			SLC24A4	solute carrier family 24 (sodium/potassium/calcium exchanger), member 4	HEATR6	HEAT repeat containing 6	CSMD2	CUB and Sushi multiple domains 2	WBP1	WW domain binding protein 1	KIAA0319L	KIAA0319-like	CTDSPL2	CTD (carboxy-terminal domain, RNA polymerase II, polypeptide A) small phosphatase like 2	SHROOM4	shroom family member 4	SNTB1	syntrophin, beta 1 (dystrophin-associated protein A1, 59kDa, basic component 1)
RUNX2	runt-related transcription factor 2	C1orf21	chromosome 1 open reading frame 21	RUSC1	RUN and SH3 domain containing 1	KCMF1	potassium channel modulatory factor 1	DTL	denticleless homolog (Drosophila)			ZBTB24	zinc finger and BTB domain containing 24	DYRK1A	dual-specificity tyrosine-(Y)-phosphorylation regulated kinase 1A			MED13L	mediator complex subunit 13-like	LRAT	lecithin retinol acyltransferase (phosphatidylcholine--retinol O-acyltransferase)	CYB5D1	cytochrome b5 domain containing 1	PTPRU	protein tyrosine phosphatase, receptor type, U	CCDC121	coiled-coil domain containing 121	2010-09-06	septin 6	BTBD7	BTB (POZ) domain containing 7			NOVA1	neuro-oncological ventral antigen 1	HBP1	HMG-box transcription factor 1	CYP4F22	cytochrome P450, family 4, subfamily F, polypeptide 22	MTSS1	metastasis suppressor 1	SEC14L5	SEC14-like 5 (S. cerevisiae)	CPEB4	cytoplasmic polyadenylation element binding protein 4	SLC4A8	solute carrier family 4, sodium bicarbonate cotransporter, member 8	NR2C2	nuclear receptor subfamily 2, group C, member 2
PKN2	protein kinase N2	ZNF211	zinc finger protein 211	TRPS1	trichorhinophalangeal syndrome I	REM2	RAS (RAD and GEM)-like GTP binding 2	PI15	peptidase inhibitor 15			C2orf18	chromosome 2 open reading frame 18	ZNF701	zinc finger protein 701			WDR5	WD repeat domain 5	NLK	nemo-like kinase	KCNB1	potassium voltage-gated channel, Shab-related subfamily, member 1	PRICKLE2	prickle homolog 2 (Drosophila)	TMEM182	transmembrane protein 182	RXRB	retinoid X receptor, beta	MEGF11	multiple EGF-like-domains 11			MBOAT1	membrane bound O-acyltransferase domain containing 1	SUDS3	suppressor of defective silencing 3 homolog (S. cerevisiae)	PHLDB3	pleckstrin homology-like domain, family B, member 3	SMOC1	SPARC related modular calcium binding 1	NFE2L1	nuclear factor (erythroid-derived 2)-like 1	ACSL3	acyl-CoA synthetase long-chain family member 3	CPEB4	cytoplasmic polyadenylation element binding protein 4	PBX3	pre-B-cell leukemia homeobox 3
SPECC1L	SPECC1-like	HMBOX1	homeobox containing 1	UBA6	ubiquitin-like modifier activating enzyme 6	CNBP	CCHC-type zinc finger, nucleic acid binding protein	C6orf168	chromosome 6 open reading frame 168			DPY19L1	dpy-19-like 1 (C. elegans)	ZNF697	zinc finger protein 697			NAT13	N-acetyltransferase 13	SLC11A2	solute carrier family 11 (proton-coupled divalent metal ion transporters), member 2	C10orf140	chromosome 10 open reading frame 140	STK4	serine/threonine kinase 4	ZNF771	zinc finger protein 771	LOC283514	similar to seven in absentia 2	BTLA	B and T lymphocyte associated			ATP11A	ATPase, class VI, type 11A	HIVEP1	human immunodeficiency virus type I enhancer binding protein 1	JUNB	jun B proto-oncogene	KIF21B	kinesin family member 21B	SRPX2	sushi-repeat-containing protein, X-linked 2	CUL4B	cullin 4B	RAB6B	RAB6B, member RAS oncogene family	RGS9BP	regulator of G protein signaling 9 binding protein
FCHO2	FCH domain only 2	KDELR3	KDEL (Lys-Asp-Glu-Leu) endoplasmic reticulum protein retention receptor 3	FGFR2	fibroblast growth factor receptor 2 (bacteria-expressed kinase, keratinocyte growth factor receptor, craniofacial dysostosis 1, Crouzon syndrome, Pfeiffer syndrome, Jackson-Weiss syndrome)			C6orf35	chromosome 6 open reading frame 35			EGR3	early growth response 3	ZNF28	zinc finger protein 28			NRAS	neuroblastoma RAS viral (v-ras) oncogene homolog	TIAL1	TIA1 cytotoxic granule-associated RNA binding protein-like 1	WTAP	Wilms tumor 1 associated protein	TFE3	transcription factor binding to IGHM enhancer 3	FOXM1	forkhead box M1	ATP4A	ATPase, H+/K+ exchanging, alpha polypeptide	ZFHX4	zinc finger homeobox 4			FRMD6	FERM domain containing 6	SORCS3	sortilin-related VPS10 domain containing receptor 3	PPFIA3	protein tyrosine phosphatase, receptor type, f polypeptide (PTPRF), interacting protein (liprin), alpha 3	KIAA0152	KIAA0152	FAT3	FAT tumor suppressor homolog 3 (Drosophila)	LOC26010	viral DNA polymerase-transactivated protein 6	GRB10	growth factor receptor-bound protein 10	ESRRG	estrogen-related receptor gamma
C8orf79	chromosome 8 open reading frame 79	MKL2	MKL/myocardin-like 2	DNAJC22	DnaJ (Hsp40) homolog, subfamily C, member 22			ARL4C	ADP-ribosylation factor-like 4C			SEMA5A	sema domain, seven thrombospondin repeats (type 1 and type 1-like), transmembrane domain (TM) and short cytoplasmic domain, (semaphorin) 5A	FAM45A	family with sequence similarity 45, member A			OSBPL3	oxysterol binding protein-like 3	WHSC1L1	Wolf-Hirschhorn syndrome candidate 1-like 1	CDK6	cyclin-dependent kinase 6	NFE2L1	nuclear factor (erythroid-derived 2)-like 1	XK	X-linked Kx blood group (McLeod syndrome)	ONECUT2	one cut homeobox 2	DBT	dihydrolipoamide branched chain transacylase E2			HBS1L	HBS1-like (S. cerevisiae)	YTHDC1	YTH domain containing 1	NRGN	neurogranin (protein kinase C substrate, RC3)	JPH4	junctophilin 4	Gcom1	GRINL1A combined protein	SLC25A3	solute carrier family 25 (mitochondrial carrier; phosphate carrier), member 3	TNS1	tensin 1	NXT2	nuclear transport factor 2-like export factor 2
YTHDF3	YTH domain family, member 3	ZCCHC2	zinc finger, CCHC domain containing 2	SMAD2	SMAD family member 2			MAF	v-maf musculoaponeurotic fibrosarcoma oncogene homolog (avian)			SPTLC1	serine palmitoyltransferase, long chain base subunit 1	CCDC4	coiled-coil domain containing 4			CREBBP	CREB binding protein (Rubinstein-Taybi syndrome)	CCDC56	coiled-coil domain containing 56	SOX21	SRY (sex determining region Y)-box 21	MTCH2	mitochondrial carrier homolog 2 (C. elegans)	PPP2R2A	protein phosphatase 2 (formerly 2A), regulatory subunit B, alpha isoform	DGCR14	DiGeorge syndrome critical region gene 14	KATNAL1	katanin p60 subunit A-like 1			HYAL3	hyaluronoglucosaminidase 3	MTNR1B	melatonin receptor 1B	TGFB1	transforming growth factor, beta 1	PLEKHM1	pleckstrin homology domain containing, family M (with RUN domain) member 1	GRINL1A	glutamate receptor, ionotropic, N-methyl D-aspartate-like 1A	LPGAT1	lysophosphatidylglycerol acyltransferase 1	EEF1A1	eukaryotic translation elongation factor 1 alpha 1	SEMA3A	sema domain, immunoglobulin domain (Ig), short basic domain, secreted, (semaphorin) 3A
PHF16	PHD finger protein 16	C3orf45	chromosome 3 open reading frame 45	C10orf81	chromosome 10 open reading frame 81			KIAA0355	KIAA0355			SH3TC2	SH3 domain and tetratricopeptide repeats 2	ZNF295	zinc finger protein 295			C7orf24	chromosome 7 open reading frame 24	CCDC6	coiled-coil domain containing 6	FAM78A	family with sequence similarity 78, member A	HOXA3	homeobox A3	ADO	2-aminoethanethiol (cysteamine) dioxygenase	ATXN7	ataxin 7	TRIM2	tripartite motif-containing 2			RC3H1	ring finger and CCCH-type zinc finger domains 1	FLJ36031	hypothetical protein FLJ36031			LENEP	lens epithelial protein	NECAP1	NECAP endocytosis associated 1	PAPPA	pregnancy-associated plasma protein A, pappalysin 1	BCR	breakpoint cluster region	CDK6	cyclin-dependent kinase 6
ADCY9	adenylate cyclase 9	LRRC8E	leucine rich repeat containing 8 family, member E	SCN4B	sodium channel, voltage-gated, type IV, beta			ZDHHC21	zinc finger, DHHC-type containing 21			CMPK1	cytidine monophosphate (UMP-CMP) kinase 1, cytosolic	PSD3	pleckstrin and Sec7 domain containing 3			PDIK1L	PDLIM1 interacting kinase 1 like	RPS29	ribosomal protein S29	PHLPPL	PH domain and leucine rich repeat protein phosphatase-like	SNN	stannin	MLLT6	myeloid/lymphoid or mixed-lineage leukemia (trithorax homolog, Drosophila); translocated to, 6	CALM1	calmodulin 1 (phosphorylase kinase, delta)	TBRG1	transforming growth factor beta regulator 1			DACH1	dachshund homolog 1 (Drosophila)	RAB11FIP4	RAB11 family interacting protein 4 (class II)			ACCN2	amiloride-sensitive cation channel 2, neuronal	TBKBP1	TBK1 binding protein 1	C18orf1	chromosome 18 open reading frame 1	TGFBR1	transforming growth factor, beta receptor I (activin A receptor type II-like kinase, 53kDa)	ARFIP1	ADP-ribosylation factor interacting protein 1 (arfaptin 1)
SOX5	SRY (sex determining region Y)-box 5	MGC24039	hypothetical protein MGC24039	AFF1	AF4/FMR2 family, member 1			KIF13B	kinesin family member 13B			LEMD3	LEM domain containing 3	GRHL1	grainyhead-like 1 (Drosophila)			MTPN	myotrophin	C17orf45	chromosome 17 open reading frame 45	PTPRK	protein tyrosine phosphatase, receptor type, K	TFAP2A	transcription factor AP-2 alpha (activating enhancer binding protein 2 alpha)	WNK3	WNK lysine deficient protein kinase 3	IRF2	interferon regulatory factor 2	HNRNPF	heterogeneous nuclear ribonucleoprotein F			AMBRA1	autophagy/beclin-1 regulator 1	GATAD2B	GATA zinc finger domain containing 2B			ARAF	v-raf murine sarcoma 3611 viral oncogene homolog	KCTD5	potassium channel tetramerisation domain containing 5	NR2C2	nuclear receptor subfamily 2, group C, member 2	NFIB	nuclear factor I/B	MLLT3	myeloid/lymphoid or mixed-lineage leukemia (trithorax homolog, Drosophila); translocated to, 3
CDC42SE2	CDC42 small effector 2	NUFIP2	nuclear fragile X mental retardation protein interacting protein 2	LOC51035	SAPK substrate protein 1			LRRTM2	leucine rich repeat transmembrane neuronal 2			NPTN	neuroplastin	MIER3	mesoderm induction early response 1, family member 3			INSR	insulin receptor	NAPA	N-ethylmaleimide-sensitive factor attachment protein, alpha	KRT80	keratin 80	KCNK12	potassium channel, subfamily K, member 12	KIAA0408	KIAA0408	FAM152A	family with sequence similarity 152, member A	NDFIP1	Nedd4 family interacting protein 1			DGKG	diacylglycerol kinase, gamma 90kDa	PXN	paxillin			SEZ6	seizure related 6 homolog (mouse)	CLIP2	CAP-GLY domain containing linker protein 2	hCG_18385	similar to cAMP-regulated phosphoprotein	HUWE1	HECT, UBA and WWE domain containing 1	FANCF	Fanconi anemia, complementation group F
RTN3	reticulon 3	MSI1	musashi homolog 1 (Drosophila)	MCAM	melanoma cell adhesion molecule			LIX1	Lix1 homolog (chicken)			FAM98A	family with sequence similarity 98, member A	AFF3	AF4/FMR2 family, member 3			HOXA3	homeobox A3	PLAGL2	pleiomorphic adenoma gene-like 2	FZD4	frizzled homolog 4 (Drosophila)	TBC1D10B	TBC1 domain family, member 10B	BAZ2B	bromodomain adjacent to zinc finger domain, 2B	PERLD1	per1-like domain containing 1	KLF12	Kruppel-like factor 12			F13A1	coagulation factor XIII, A1 polypeptide	RBED1	RNA binding motif and ELMO/CED-12 domain 1			RFXAP	regulatory factor X-associated protein	CCPG1	cell cycle progression 1	HMG20A	high-mobility group 20A	SMC1A	structural maintenance of chromosomes 1A	HRB	HIV-1 Rev binding protein
NPY1R	neuropeptide Y receptor Y1	TGFB3	transforming growth factor, beta 3	USP48	ubiquitin specific peptidase 48			ARRDC3	arrestin domain containing 3			ZNF395	zinc finger protein 395	PIK3C2A	phosphoinositide-3-kinase, class 2, alpha polypeptide			TMEM129	transmembrane protein 129	EDNRB	endothelin receptor type B	WDR89	WD repeat domain 89	CCNL2	cyclin L2	HES5	hairy and enhancer of split 5 (Drosophila)	CCDC13	coiled-coil domain containing 13	CHIC1	cysteine-rich hydrophobic domain 1			SLC12A6	solute carrier family 12 (potassium/chloride transporters), member 6	EFNA3	ephrin-A3			C5orf13	chromosome 5 open reading frame 13	POLM	polymerase (DNA directed), mu	ENAH	enabled homolog (Drosophila)	TMEM95	transmembrane protein 95	PCDHAC1	protocadherin alpha subfamily C, 1
TGFBR2	transforming growth factor, beta receptor II (70/80kDa)	UNC119B	unc-119 homolog B (C. elegans)	YWHAZ	tyrosine 3-monooxygenase/tryptophan 5-monooxygenase activation protein, zeta polypeptide			HELZ	helicase with zinc finger			ZMAT4	zinc finger, matrin type 4	C6orf168	chromosome 6 open reading frame 168			ELAVL3	ELAV (embryonic lethal, abnormal vision, Drosophila)-like 3 (Hu antigen C)	PREB	prolactin regulatory element binding	RXRB	retinoid X receptor, beta	HOXC8	homeobox C8	CPM	carboxypeptidase M	AFF1	AF4/FMR2 family, member 1	AEBP2	AE binding protein 2			FOXN3	forkhead box N3	DKFZP564O0823	DKFZP564O0823 protein			USP9X	ubiquitin specific peptidase 9, X-linked	TRIB3	tribbles homolog 3 (Drosophila)	TMEM65	transmembrane protein 65	THSD4	thrombospondin, type I, domain containing 4	PCDHAC2	protocadherin alpha subfamily C, 2
SAMD12	sterile alpha motif domain containing 12	CACNB3	calcium channel, voltage-dependent, beta 3 subunit	MAP2K3	mitogen-activated protein kinase kinase 3			ST8SIA4	ST8 alpha-N-acetyl-neuraminide alpha-2,8-sialyltransferase 4			MSRB3	methionine sulfoxide reductase B3	DYNC1I1	dynein, cytoplasmic 1, intermediate chain 1			PTDSS1	phosphatidylserine synthase 1	C1QTNF5	C1q and tumor necrosis factor related protein 5	SOX11	SRY (sex determining region Y)-box 11	BCL9L	B-cell CLL/lymphoma 9-like	GATA2	GATA binding protein 2	GDPD5	glycerophosphodiester phosphodiesterase domain containing 5	PAPOLA	poly(A) polymerase alpha			C16orf72	chromosome 16 open reading frame 72	NKIRAS2	NFKB inhibitor interacting Ras-like 2			NPAS2	neuronal PAS domain protein 2	AKIRIN1	akirin 1	ATAD2B	ATPase family, AAA domain containing 2B	BCL6	B-cell CLL/lymphoma 6 (zinc finger protein 51)	PCDHA1	protocadherin alpha 1
PIGH	phosphatidylinositol glycan anchor biosynthesis, class H	PCBP1	poly(rC) binding protein 1	MXD1	MAX dimerization protein 1			ANTXR1	anthrax toxin receptor 1			NRN1	neuritin 1	THRB	thyroid hormone receptor, beta (erythroblastic leukemia viral (v-erb-a) oncogene homolog 2, avian)			MAP4K4	mitogen-activated protein kinase kinase kinase kinase 4	CRKRS	Cdc2-related kinase, arginine/serine-rich	SH3KBP1	SH3-domain kinase binding protein 1	RPS6KA3	ribosomal protein S6 kinase, 90kDa, polypeptide 3	YAF2	YY1 associated factor 2	PSME1	proteasome (prosome, macropain) activator subunit 1 (PA28 alpha)	GALNT7	UDP-N-acetyl-alpha-D-galactosamine:polypeptide N-acetylgalactosaminyltransferase 7 (GalNAc-T7)			ATG12	ATG12 autophagy related 12 homolog (S. cerevisiae)	DPYSL3	dihydropyrimidinase-like 3			SNX1	sorting nexin 1	MICAL3	microtubule associated monoxygenase, calponin and LIM domain containing 3	PRCC	papillary renal cell carcinoma (translocation-associated)	FXC1	fracture callus 1 homolog (rat)	PCDHA10	protocadherin alpha 10
SNTB2	syntrophin, beta 2 (dystrophin-associated protein A1, 59kDa, basic component 2)	EGR3	early growth response 3	CDC2L6	cell division cycle 2-like 6 (CDK8-like)			NLRC3	NLR family, CARD domain containing 3			INADL	InaD-like (Drosophila)	AXIN2	axin 2 (conductin, axil)			CRTAP	cartilage associated protein	IQSEC2	IQ motif and Sec7 domain 2	FCHSD2	FCH and double SH3 domains 2			TRPS1	trichorhinophalangeal syndrome I	RMND5A	required for meiotic nuclear division 5 homolog A (S. cerevisiae)	SH3TC2	SH3 domain and tetratricopeptide repeats 2			DDX50	DEAD (Asp-Glu-Ala-Asp) box polypeptide 50	CNNM1	cyclin M1			IRS1	insulin receptor substrate 1	TMEM35	transmembrane protein 35	BACH2	BTB and CNC homology 1, basic leucine zipper transcription factor 2	PAK7	p21 protein (Cdc42/Rac)-activated kinase 7	PCDHA11	protocadherin alpha 11
SEMA4A	sema domain, immunoglobulin domain (Ig), transmembrane domain (TM) and short cytoplasmic domain, (semaphorin) 4A	TGFBI	transforming growth factor, beta-induced, 68kDa	ACSL6	acyl-CoA synthetase long-chain family member 6			DYRK1A	dual-specificity tyrosine-(Y)-phosphorylation regulated kinase 1A			VCAM1	vascular cell adhesion molecule 1	H2AFJ	H2A histone family, member J			CXorf36	chromosome X open reading frame 36	KCNJ5	potassium inwardly-rectifying channel, subfamily J, member 5	RNF121	ring finger protein 121			BAT2D1	BAT2 domain containing 1	CSNK1G1	casein kinase 1, gamma 1	HNRNPK	heterogeneous nuclear ribonucleoprotein K			FAM168B	family with sequence similarity 168, member B	NEURL	neuralized homolog (Drosophila)			EFNB1	ephrin-B1	VPS25	vacuolar protein sorting 25 homolog (S. cerevisiae)	ZC3H12C	zinc finger CCCH-type containing 12C	DIP2C	DIP2 disco-interacting protein 2 homolog C (Drosophila)	PCDHA12	protocadherin alpha 12
TRAF5	TNF receptor-associated factor 5	SMARCC1	SWI/SNF related, matrix associated, actin dependent regulator of chromatin, subfamily c, member 1	MMAB	methylmalonic aciduria (cobalamin deficiency) cblB type			CREB5	cAMP responsive element binding protein 5			MYH10	myosin, heavy chain 10, non-muscle	C18orf34	chromosome 18 open reading frame 34			NANOS2	nanos homolog 2 (Drosophila)	PCDH1	protocadherin 1	RAB6B	RAB6B, member RAS oncogene family			MED13	mediator complex subunit 13	ZNF740	zinc finger protein 740	AAK1	AP2 associated kinase 1			ZC3H6	zinc finger CCCH-type containing 6	C16orf53	chromosome 16 open reading frame 53			ST8SIA4	ST8 alpha-N-acetyl-neuraminide alpha-2,8-sialyltransferase 4	FAIM2	Fas apoptotic inhibitory molecule 2	ZCCHC5	zinc finger, CCHC domain containing 5	KIFC3	kinesin family member C3	PCDHA13	protocadherin alpha 13
RICTOR	rapamycin-insensitive companion of mTOR	PCBP2	poly(rC) binding protein 2	C10orf25	chromosome 10 open reading frame 25			DCX	doublecortex; lissencephaly, X-linked (doublecortin)			FAM134C	family with sequence similarity 134, member C	GNRHR	gonadotropin-releasing hormone receptor			SYNC1	syncoilin, intermediate filament 1	SIDT2	SID1 transmembrane family, member 2	NOL6	nucleolar protein family 6 (RNA-associated)			FOXP1	forkhead box P1	PHF15	PHD finger protein 15	ARL8B	ADP-ribosylation factor-like 8B			FLJ44635	TPT1-like protein	SAP18	Sin3A-associated protein, 18kDa			ALPK3	alpha-kinase 3	SCAMP5	secretory carrier membrane protein 5	PIGA	phosphatidylinositol glycan anchor biosynthesis, class A (paroxysmal nocturnal hemoglobinuria)	FIGN	fidgetin	PCDHA2	protocadherin alpha 2
SLC6A1	solute carrier family 6 (neurotransmitter transporter, GABA), member 1	SFRS3	splicing factor, arginine/serine-rich 3	C20orf194	chromosome 20 open reading frame 194			ERBB4	v-erb-a erythroblastic leukemia viral oncogene homolog 4 (avian)			HNRNPA3	heterogeneous nuclear ribonucleoprotein A3	PPP1R11	protein phosphatase 1, regulatory (inhibitor) subunit 11			SOX11	SRY (sex determining region Y)-box 11	FAM131B	family with sequence similarity 131, member B	RANBP9	RAN binding protein 9			NKAIN2	Na+/K+ transporting ATPase interacting 2	SMAD7	SMAD family member 7	TET2	tet oncogene family member 2			SGTB	small glutamine-rich tetratricopeptide repeat (TPR)-containing, beta	SCML4	sex comb on midleg-like 4 (Drosophila)			ETV6	ets variant gene 6 (TEL oncogene)	KIAA0152	KIAA0152	LRRC4	leucine rich repeat containing 4	ASTN1	astrotactin 1	PCDHA3	protocadherin alpha 3
ACSL1	acyl-CoA synthetase long-chain family member 1	AHCTF1	AT hook containing transcription factor 1	PAN2	PAN2 polyA specific ribonuclease subunit homolog (S. cerevisiae)			TLL1	tolloid-like 1			ZNF385A	zinc finger protein 385A	ANKFY1	ankyrin repeat and FYVE domain containing 1			NR2C2	nuclear receptor subfamily 2, group C, member 2	WDR22	WD repeat domain 22	TP53INP2	tumor protein p53 inducible nuclear protein 2			SLC6A17	solute carrier family 6, member 17	CDX2	caudal type homeobox 2	HS2ST1	heparan sulfate 2-O-sulfotransferase 1			LRRC58	leucine rich repeat containing 58	PYGO2	pygopus homolog 2 (Drosophila)			ADAMTS7	ADAM metallopeptidase with thrombospondin type 1 motif, 7	UBE2W	ubiquitin-conjugating enzyme E2W (putative)	RBJ	rab and DnaJ domain containing	MLLT3	myeloid/lymphoid or mixed-lineage leukemia (trithorax homolog, Drosophila); translocated to, 3	PCDHA4	protocadherin alpha 4
ZYG11B	zyg-11 homolog B (C. elegans)	VPS45	vacuolar protein sorting 45 homolog (S. cerevisiae)	APOA4	apolipoprotein A-IV			SLC4A7	solute carrier family 4, sodium bicarbonate cotransporter, member 7			SOS1	son of sevenless homolog 1 (Drosophila)	ZFP36L1	zinc finger protein 36, C3H type-like 1			ARHGAP26	Rho GTPase activating protein 26	AQP1	aquaporin 1 (Colton blood group)	SMARCD1	SWI/SNF related, matrix associated, actin dependent regulator of chromatin, subfamily d, member 1			CALU	calumenin	TP53INP1	tumor protein p53 inducible nuclear protein 1	DLGAP2	discs, large (Drosophila) homolog-associated protein 2			UBE2B	ubiquitin-conjugating enzyme E2B (RAD6 homolog)	PAPLN	papilin, proteoglycan-like sulfated glycoprotein			SLC6A8	solute carrier family 6 (neurotransmitter transporter, creatine), member 8	SV2B	synaptic vesicle glycoprotein 2B	DDEF1	development and differentiation enhancing factor 1	NAT5	N-acetyltransferase 5	PCDHA5	protocadherin alpha 5
RAB6A	RAB6A, member RAS oncogene family	NDRG3	NDRG family member 3	KANK4	KN motif and ankyrin repeat domains 4			SGCD	sarcoglycan, delta (35kDa dystrophin-associated glycoprotein)			RIC8B	resistance to inhibitors of cholinesterase 8 homolog B (C. elegans)	QTRTD1	queuine tRNA-ribosyltransferase domain containing 1			MAMLD1	mastermind-like domain containing 1	ALAD	aminolevulinate, delta-, dehydratase	CREG2	cellular repressor of E1A-stimulated genes 2			C1orf107	chromosome 1 open reading frame 107	ZBTB43	zinc finger and BTB domain containing 43	MAP2	microtubule-associated protein 2			LETM1	leucine zipper-EF-hand containing transmembrane protein 1	DPY19L1	dpy-19-like 1 (C. elegans)			SMG5	Smg-5 homolog, nonsense mediated mRNA decay factor (C. elegans)	GABRA3	gamma-aminobutyric acid (GABA) A receptor, alpha 3	XRN1	5'-3' exoribonuclease 1	STXBP5	syntaxin binding protein 5 (tomosyn)	PCDHA6	protocadherin alpha 6
ACTN1	actinin, alpha 1	PIP4K2B	phosphatidylinositol-5-phosphate 4-kinase, type II, beta	EXT1	exostoses (multiple) 1			GK5	glycerol kinase 5 (putative)			GPR85	G protein-coupled receptor 85	JARID1A	jumonji, AT rich interactive domain 1A			NRIP1	nuclear receptor interacting protein 1	ACCN1	amiloride-sensitive cation channel 1, neuronal (degenerin)	C1orf130	chromosome 1 open reading frame 130			ASB12	ankyrin repeat and SOCS box-containing 12	ATP11B	ATPase, class VI, type 11B	PDE7B	phosphodiesterase 7B			PRDM10	PR domain containing 10	JMJD3	jumonji domain containing 3, histone lysine demethylase			DBH	dopamine beta-hydroxylase (dopamine beta-monooxygenase)	EPB49	erythrocyte membrane protein band 4.9 (dematin)	JARID2	jumonji, AT rich interactive domain 2	HNRNPA3	heterogeneous nuclear ribonucleoprotein A3	PCDHA7	protocadherin alpha 7
C3orf70	chromosome 3 open reading frame 70	SYT9	synaptotagmin IX	NRK	Nik related kinase			KIAA1429	KIAA1429			MAEA	macrophage erythroblast attacher	NHLH2	nescient helix loop helix 2			FAM80B	family with sequence similarity 80, member B	HS6ST3	heparan sulfate 6-O-sulfotransferase 3	VPS25	vacuolar protein sorting 25 homolog (S. cerevisiae)			PURB	purine-rich element binding protein B	TLN2	talin 2	PJA2	praja 2, RING-H2 motif containing			RANBP3	RAN binding protein 3	DAGLA	diacylglycerol lipase, alpha			ASXL1	additional sex combs like 1 (Drosophila)	COL6A3	collagen, type VI, alpha 3	CAPZA1	capping protein (actin filament) muscle Z-line, alpha 1	C16orf82	chromosome 16 open reading frame 82	PCDHA8	protocadherin alpha 8
SYNGR1	synaptogyrin 1	BACE1	beta-site APP-cleaving enzyme 1	TRAF4	TNF receptor-associated factor 4			HS3ST1	heparan sulfate (glucosamine) 3-O-sulfotransferase 1			STC1	stanniocalcin 1	ZC3H10	zinc finger CCCH-type containing 10			KCNMA1	potassium large conductance calcium-activated channel, subfamily M, alpha member 1	CORO1C	coronin, actin binding protein, 1C	ODZ4	odz, odd Oz/ten-m homolog 4 (Drosophila)			FAM134A	family with sequence similarity 134, member A	SCN1A	sodium channel, voltage-gated, type I, alpha subunit	ZNF382	zinc finger protein 382			HIPK2	homeodomain interacting protein kinase 2	RPA2	replication protein A2, 32kDa			ZNF280C	zinc finger protein 280C	IER2	immediate early response 2	FCHSD2	FCH and double SH3 domains 2	RNF141	ring finger protein 141	HELZ	helicase with zinc finger
PUM1	pumilio homolog 1 (Drosophila)	RUNX1T1	runt-related transcription factor 1; translocated to, 1 (cyclin D-related)	ANKRD52	ankyrin repeat domain 52			SEPHS1	selenophosphate synthetase 1			CELSR3	cadherin, EGF LAG seven-pass G-type receptor 3 (flamingo homolog, Drosophila)	CDH2	cadherin 2, type 1, N-cadherin (neuronal)			MXRA7	matrix-remodelling associated 7	KIAA1045	KIAA1045	CALN1	calneuron 1			FXR2	fragile X mental retardation, autosomal homolog 2	TCFL5	transcription factor-like 5 (basic helix-loop-helix)	HOMER1	homer homolog 1 (Drosophila)			APAF1	apoptotic peptidase activating factor 1	TSEN54	tRNA splicing endonuclease 54 homolog (S. cerevisiae)			LRCH4	leucine-rich repeats and calponin homology (CH) domain containing 4	FOXP1	forkhead box P1	TMEM170B	transmembrane protein 170B	TOMM40L	translocase of outer mitochondrial membrane 40 homolog (yeast)-like	PCGF5	polycomb group ring finger 5
TOB1	transducer of ERBB2, 1	RBM12	RNA binding motif protein 12	RAB37	RAB37, member RAS oncogene family			WBP2	WW domain binding protein 2			CABP4	calcium binding protein 4	NIPBL	Nipped-B homolog (Drosophila)			PHC2	polyhomeotic homolog 2 (Drosophila)	RRP15	ribosomal RNA processing 15 homolog (S. cerevisiae)	CA7	carbonic anhydrase VII			C16orf72	chromosome 16 open reading frame 72	RNF4	ring finger protein 4	ABCC4	ATP-binding cassette, sub-family C (CFTR/MRP), member 4			KLHL6	kelch-like 6 (Drosophila)	IGF2BP1	insulin-like growth factor 2 mRNA binding protein 1			FBXO46	F-box protein 46	WASL	Wiskott-Aldrich syndrome-like	KCMF1	potassium channel modulatory factor 1	LIN54	lin-54 homolog (C. elegans)	DNER	delta/notch-like EGF repeat containing
RNF139	ring finger protein 139	PCDH9	protocadherin 9	TYRO3	TYRO3 protein tyrosine kinase			PHLDA1	pleckstrin homology-like domain, family A, member 1			ZNF579	zinc finger protein 579	SPTY2D1	SPT2, Suppressor of Ty, domain containing 1 (S. cerevisiae)			RCAN2	regulator of calcineurin 2	PPP3CA	protein phosphatase 3 (formerly 2B), catalytic subunit, alpha isoform	SYNPO2	synaptopodin 2			ABAT	4-aminobutyrate aminotransferase	SLC26A6	solute carrier family 26, member 6	KIAA1632	KIAA1632			RAB6A	RAB6A, member RAS oncogene family	GGA2	golgi associated, gamma adaptin ear containing, ARF binding protein 2			SUPT16H	suppressor of Ty 16 homolog (S. cerevisiae)	C5orf4	chromosome 5 open reading frame 4	NDFIP1	Nedd4 family interacting protein 1	METTL8	methyltransferase like 8	CPD	carboxypeptidase D
MBNL2	muscleblind-like 2 (Drosophila)	EDARADD	EDAR-associated death domain	DUSP3	dual specificity phosphatase 3			EN2	engrailed homeobox 2			INSIG1	insulin induced gene 1	C12orf12	chromosome 12 open reading frame 12			2010-09-03	septin 3	ZNF148	zinc finger protein 148	ATP9A	ATPase, class II, type 9A			ATN1	atrophin 1	PHC2	polyhomeotic homolog 2 (Drosophila)	ELAVL1	ELAV (embryonic lethal, abnormal vision, Drosophila)-like 1 (Hu antigen R)			EPC2	enhancer of polycomb homolog 2 (Drosophila)	BRD2	bromodomain containing 2			NMT1	N-myristoyltransferase 1	CIITA	class II, major histocompatibility complex, transactivator	ARPP-19	cyclic AMP phosphoprotein, 19 kD	G3BP2	GTPase activating protein (SH3 domain) binding protein 2	ENAH	enabled homolog (Drosophila)
SFRP2	secreted frizzled-related protein 2	PPP1R15B	protein phosphatase 1, regulatory (inhibitor) subunit 15B	PDE11A	phosphodiesterase 11A			BRWD1	bromodomain and WD repeat domain containing 1			TGIF2	TGFB-induced factor homeobox 2	CAMK2G	calcium/calmodulin-dependent protein kinase (CaM kinase) II gamma			KIAA0892	KIAA0892	CCDC88B	coiled-coil domain containing 88B	MAP3K1	mitogen-activated protein kinase kinase kinase 1			tcag7.1228	hypothetical protein FLJ25778	NLGN2	neuroligin 2	WDR32	WD repeat domain 32			C4orf16	chromosome 4 open reading frame 16	ALDH1A2	aldehyde dehydrogenase 1 family, member A2			SYNGR1	synaptogyrin 1	RAB22A	RAB22A, member RAS oncogene family	SPRY1	sprouty homolog 1, antagonist of FGF signaling (Drosophila)	ZCCHC24	zinc finger, CCHC domain containing 24	ARL8B	ADP-ribosylation factor-like 8B
PPP1CB	protein phosphatase 1, catalytic subunit, beta isoform	DAAM2	dishevelled associated activator of morphogenesis 2	FAM120C	family with sequence similarity 120C			STXBP5L	syntaxin binding protein 5-like			SURF4	surfeit 4	IHPK1	inositol hexaphosphate kinase 1			FBXO11	F-box protein 11	PCYT1B	phosphate cytidylyltransferase 1, choline, beta	YBX2	Y box binding protein 2			CBFA2T3	core-binding factor, runt domain, alpha subunit 2; translocated to, 3	C8orf79	chromosome 8 open reading frame 79	DCTN5	dynactin 5 (p25)			STXBP5L	syntaxin binding protein 5-like	RIMS4	regulating synaptic membrane exocytosis 4			WNT11	wingless-type MMTV integration site family, member 11	PLEKHG3	pleckstrin homology domain containing, family G (with RhoGef domain) member 3	CLDN11	claudin 11 (oligodendrocyte transmembrane protein)	GZF1	GDNF-inducible zinc finger protein 1	SPOPL	speckle-type POZ protein-like
HAPLN1	hyaluronan and proteoglycan link protein 1	XPO5	exportin 5	ABI1	abl-interactor 1			CPEB2	cytoplasmic polyadenylation element binding protein 2			WDFY1	WD repeat and FYVE domain containing 1	OLFML2B	olfactomedin-like 2B			THRAP3	thyroid hormone receptor associated protein 3	ACTR1A	ARP1 actin-related protein 1 homolog A, centractin alpha (yeast)	AOF1	amine oxidase (flavin containing) domain 1			MCART6	mitochondrial carrier triple repeat 6	R3HDM2	R3H domain containing 2	PCNX	pecanex homolog (Drosophila)			FOXK2	forkhead box K2	PHC2	polyhomeotic homolog 2 (Drosophila)			ZNF609	zinc finger protein 609	C2orf18	chromosome 2 open reading frame 18	ZNF609	zinc finger protein 609	ERP29	endoplasmic reticulum protein 29	TRIAP1	TP53 regulated inhibitor of apoptosis 1
ARF6	ADP-ribosylation factor 6	TAL1	T-cell acute lymphocytic leukemia 1	C15orf57	chromosome 15 open reading frame 57			SP2	Sp2 transcription factor			HS2ST1	heparan sulfate 2-O-sulfotransferase 1	GRIA1	glutamate receptor, ionotropic, AMPA 1			KY	kyphoscoliosis peptidase	SGSM1	small G protein signaling modulator 1	PLXDC1	plexin domain containing 1			DDX3X	DEAD (Asp-Glu-Ala-Asp) box polypeptide 3, X-linked	EDA	ectodysplasin A	GCNT1	glucosaminyl (N-acetyl) transferase 1, core 2 (beta-1,6-N-acetylglucosaminyltransferase)			BCL11A	B-cell CLL/lymphoma 11A (zinc finger protein)	WDR23	WD repeat domain 23			VTI1A	vesicle transport through interaction with t-SNAREs homolog 1A (yeast)	TEX261	testis expressed 261	ZCCHC14	zinc finger, CCHC domain containing 14	CCND2	cyclin D2	MTMR12	myotubularin related protein 12
VAT1	vesicle amine transport protein 1 homolog (T. californica)	BSPRY	B-box and SPRY domain containing	FBXW7	F-box and WD repeat domain containing 7			FAM53C	family with sequence similarity 53, member C			SSR1	signal sequence receptor, alpha (translocon-associated protein alpha)	KIAA0355	KIAA0355			SOX5	SRY (sex determining region Y)-box 5	ERLIN1	ER lipid raft associated 1	ATXN10	ataxin 10			DCUN1D1	DCN1, defective in cullin neddylation 1, domain containing 1 (S. cerevisiae)	ZNRF3	zinc and ring finger 3	ESRRG	estrogen-related receptor gamma			EDAR	ectodysplasin A receptor	AKT2	v-akt murine thymoma viral oncogene homolog 2			BAZ1B	bromodomain adjacent to zinc finger domain, 1B	LOC26010	viral DNA polymerase-transactivated protein 6	C10orf140	chromosome 10 open reading frame 140	SPOPL	speckle-type POZ protein-like	ERMN	ermin, ERM-like protein
SERP1	stress-associated endoplasmic reticulum protein 1	TEF	thyrotrophic embryonic factor	RASL10B	RAS-like, family 10, member B			NEK11	NIMA (never in mitosis gene a)- related kinase 11			NUDT21	nudix (nucleoside diphosphate linked moiety X)-type motif 21	ZCRB1	zinc finger CCHC-type and RNA binding motif 1			SYNGR1	synaptogyrin 1	MED29	mediator complex subunit 29	TXNDC4	thioredoxin domain containing 4 (endoplasmic reticulum)			PPP2R3A	protein phosphatase 2 (formerly 2A), regulatory subunit B', alpha	KPNA1	karyopherin alpha 1 (importin alpha 5)	FKBP5	FK506 binding protein 5			LACE1	lactation elevated 1	PRDM2	PR domain containing 2, with ZNF domain			L1CAM	L1 cell adhesion molecule	TMEM106A	transmembrane protein 106A	ELMOD1	ELMO/CED-12 domain containing 1	UBE2Z	ubiquitin-conjugating enzyme E2Z	ATP11A	ATPase, class VI, type 11A
FRMD4A	FERM domain containing 4A	CPEB2	cytoplasmic polyadenylation element binding protein 2	CBL	Cas-Br-M (murine) ecotropic retroviral transforming sequence			BCL7A	B-cell CLL/lymphoma 7A			C10orf49	chromosome 10 open reading frame 49	MEX3C	mex-3 homolog C (C. elegans)			SLC25A45	solute carrier family 25, member 45	PIK3R1	phosphoinositide-3-kinase, regulatory subunit 1 (alpha)	UBTD2	ubiquitin domain containing 2			KLHDC8B	kelch domain containing 8B	GATA4	GATA binding protein 4	DDX52	DEAD (Asp-Glu-Ala-Asp) box polypeptide 52			NMT2	N-myristoyltransferase 2	RBMS3	RNA binding motif, single stranded interacting protein			DCX	doublecortex; lissencephaly, X-linked (doublecortin)	MRVI1	murine retrovirus integration site 1 homolog	KCNJ10	potassium inwardly-rectifying channel, subfamily J, member 10	ODZ4	odz, odd Oz/ten-m homolog 4 (Drosophila)	LMO3	LIM domain only 3 (rhombotin-like 2)
DOCK9	dedicator of cytokinesis 9	tcag7.1228	hypothetical protein FLJ25778	PJA2	praja 2, RING-H2 motif containing			ZFP36L2	zinc finger protein 36, C3H type-like 2			RAB15	RAB15, member RAS onocogene family	PTCH1	patched homolog 1 (Drosophila)			ATXN7L3	ataxin 7-like 3	ATF7	activating transcription factor 7	LASP1	LIM and SH3 protein 1			SOBP	sine oculis binding protein homolog (Drosophila)	FLJ37543	hypothetical protein FLJ37543	CALCOCO2	calcium binding and coiled-coil domain 2			SAR1B	SAR1 gene homolog B (S. cerevisiae)	ACVR1C	activin A receptor, type IC			GRIN1	glutamate receptor, ionotropic, N-methyl D-aspartate 1	CADM3	cell adhesion molecule 3	THRB	thyroid hormone receptor, beta (erythroblastic leukemia viral (v-erb-a) oncogene homolog 2, avian)	FAM155B	family with sequence similarity 155, member B	JHDM1D	jumonji C domain containing histone demethylase 1 homolog D (S. cerevisiae)
PAG1	phosphoprotein associated with glycosphingolipid microdomains 1	COL4A6	collagen, type IV, alpha 6	AKAP6	A kinase (PRKA) anchor protein 6			CAMK2A	calcium/calmodulin-dependent protein kinase (CaM kinase) II alpha			ProSAPiP1	ProSAPiP1 protein	AQP1	aquaporin 1 (Colton blood group)			tcag7.1228	hypothetical protein FLJ25778	FNIP1	folliculin interacting protein 1	tcag7.1228	hypothetical protein FLJ25778			FBXO45	F-box protein 45	GPD1	glycerol-3-phosphate dehydrogenase 1 (soluble)	SR140	U2-associated SR140 protein			CDKN2AIPNL	CDKN2A interacting protein N-terminal like	CARM1	coactivator-associated arginine methyltransferase 1			TSPAN9	tetraspanin 9	LARP1	La ribonucleoprotein domain family, member 1	PFKFB2	6-phosphofructo-2-kinase/fructose-2,6-biphosphatase 2	C19orf43	chromosome 19 open reading frame 43	DLX1	distal-less homeobox 1
MOSPD1	motile sperm domain containing 1	HCN4	hyperpolarization activated cyclic nucleotide-gated potassium channel 4	CD207	CD207 molecule, langerin			TEDDM1	transmembrane epididymal protein 1			CNOT6L	CCR4-NOT transcription complex, subunit 6-like	WASF3	WAS protein family, member 3			TFEC	transcription factor EC	COPS2	COP9 constitutive photomorphogenic homolog subunit 2 (Arabidopsis)	FAM80A	family with sequence similarity 80, member A			CCND2	cyclin D2	WDR23	WD repeat domain 23	ONECUT2	one cut homeobox 2			XPO6	exportin 6	KCNH3	potassium voltage-gated channel, subfamily H (eag-related), member 3			SERPINB8	serpin peptidase inhibitor, clade B (ovalbumin), member 8	ADAT2	adenosine deaminase, tRNA-specific 2, TAD2 homolog (S. cerevisiae)	KIAA0182	KIAA0182	CLRN1	clarin 1	ARPP-19	cyclic AMP phosphoprotein, 19 kD
HTRA3	HtrA serine peptidase 3	SHANK2	SH3 and multiple ankyrin repeat domains 2	VPS54	vacuolar protein sorting 54 homolog (S. cerevisiae)			TEAD3	TEA domain family member 3			C18orf1	chromosome 18 open reading frame 1	POLH	polymerase (DNA directed), eta			POLR2J3	RPB11b2 protein	BRSK1	BR serine/threonine kinase 1	KLHL31	kelch-like 31 (Drosophila)			EPHA8	EPH receptor A8	BAIAP2	BAI1-associated protein 2	SOX11	SRY (sex determining region Y)-box 11			MECP2	methyl CpG binding protein 2 (Rett syndrome)	IER5	immediate early response 5			TIMP2	TIMP metallopeptidase inhibitor 2	SEMA4G	sema domain, immunoglobulin domain (Ig), transmembrane domain (TM) and short cytoplasmic domain, (semaphorin) 4G	POLQ	polymerase (DNA directed), theta	CBL	Cas-Br-M (murine) ecotropic retroviral transforming sequence	RAC1	ras-related C3 botulinum toxin substrate 1 (rho family, small GTP binding protein Rac1)
PCGF2	polycomb group ring finger 2	DCX	doublecortex; lissencephaly, X-linked (doublecortin)	C1orf144	chromosome 1 open reading frame 144			BECN1	beclin 1, autophagy related			ZAK	sterile alpha motif and leucine zipper containing kinase AZK	C6orf35	chromosome 6 open reading frame 35			ENAH	enabled homolog (Drosophila)	SLC35E3	solute carrier family 35, member E3	FAM26E	family with sequence similarity 26, member E			FAM134C	family with sequence similarity 134, member C	SLC35F1	solute carrier family 35, member F1	ACVR1C	activin A receptor, type IC			USMG5	up-regulated during skeletal muscle growth 5 homolog (mouse)	LSM12	LSM12 homolog (S. cerevisiae)			EIF2B3	eukaryotic translation initiation factor 2B, subunit 3 gamma, 58kDa	STX1B	syntaxin 1B	FAR1	fatty acyl CoA reductase 1	RAVER2	ribonucleoprotein, PTB-binding 2	TMEM47	transmembrane protein 47
RIMS3	regulating synaptic membrane exocytosis 3	MID1	midline 1 (Opitz/BBB syndrome)	SLC4A4	solute carrier family 4, sodium bicarbonate cotransporter, member 4			TMEM132D	transmembrane protein 132D			TRIM67	tripartite motif-containing 67	SEMA6A	sema domain, transmembrane domain (TM), and cytoplasmic domain, (semaphorin) 6A			SLC6A17	solute carrier family 6, member 17	GPR180	G protein-coupled receptor 180	USP42	ubiquitin specific peptidase 42			C20orf160	chromosome 20 open reading frame 160	TIRAP	toll-interleukin 1 receptor (TIR) domain containing adaptor protein	SMC5	structural maintenance of chromosomes 5			PEG10	paternally expressed 10	FBXL11	F-box and leucine-rich repeat protein 11			STK35	serine/threonine kinase 35	ZNF664	zinc finger protein 664	CD109	CD109 molecule	RAB21	RAB21, member RAS oncogene family	MTDH	metadherin
ZFYVE26	zinc finger, FYVE domain containing 26	CLCN5	chloride channel 5 (nephrolithiasis 2, X-linked, Dent disease)	NPTX1	neuronal pentraxin I			RNF207	ring finger protein 207			ZYG11B	zyg-11 homolog B (C. elegans)	CALM2	calmodulin 2 (phosphorylase kinase, delta)			FAM33A	family with sequence similarity 33, member A	AFF3	AF4/FMR2 family, member 3	RAB1A	RAB1A, member RAS oncogene family			CNOT6L	CCR4-NOT transcription complex, subunit 6-like	KANK4	KN motif and ankyrin repeat domains 4	TBK1	TANK-binding kinase 1			PTPN11	protein tyrosine phosphatase, non-receptor type 11 (Noonan syndrome 1)	SH2B1	SH2B adaptor protein 1			CTDP1	CTD (carboxy-terminal domain, RNA polymerase II, polypeptide A) phosphatase, subunit 1	ADAMTS6	ADAM metallopeptidase with thrombospondin type 1 motif, 6	GRM8	glutamate receptor, metabotropic 8	IPO9	importin 9	PAPD5	PAP associated domain containing 5
PROC	protein C (inactivator of coagulation factors Va and VIIIa)	SCARA5	scavenger receptor class A, member 5 (putative)	FBXO11	F-box protein 11			NLGN3	neuroligin 3			SFRS2	splicing factor, arginine/serine-rich 2	FAM84A	family with sequence similarity 84, member A			KIF13B	kinesin family member 13B	MBD2	methyl-CpG binding domain protein 2	PHOX2B	paired-like homeobox 2b					GRIA2	glutamate receptor, ionotropic, AMPA 2	TANC2	tetratricopeptide repeat, ankyrin repeat and coiled-coil containing 2			WASL	Wiskott-Aldrich syndrome-like	C1orf144	chromosome 1 open reading frame 144			ELN	elastin (supravalvular aortic stenosis, Williams-Beuren syndrome)	SLC35E4	solute carrier family 35, member E4	CRIM1	cysteine rich transmembrane BMP regulator 1 (chordin-like)	CORO6	coronin 6	FAM44A	family with sequence similarity 44, member A
EBF3	early B-cell factor 3	METAP1	methionyl aminopeptidase 1	USP15	ubiquitin specific peptidase 15			GTF2I	general transcription factor II, i			DUSP6	dual specificity phosphatase 6	STAG3L4	stromal antigen 3-like 4			FOSB	FBJ murine osteosarcoma viral oncogene homolog B	2010-09-09	septin 9	SYNGR1	synaptogyrin 1					ILF3	interleukin enhancer binding factor 3, 90kDa	CHML	choroideremia-like (Rab escort protein 2)			HIP1	huntingtin interacting protein 1	ATOH8	atonal homolog 8 (Drosophila)			KPNB1	karyopherin (importin) beta 1	EDC3	enhancer of mRNA decapping 3 homolog (S. cerevisiae)	NT5C1B	5'-nucleotidase, cytosolic IB	AFF1	AF4/FMR2 family, member 1	GCNT4	glucosaminyl (N-acetyl) transferase 4, core 2 (beta-1,6-N-acetylglucosaminyltransferase)
TUB	tubby homolog (mouse)	JHDM1D	jumonji C domain containing histone demethylase 1 homolog D (S. cerevisiae)	LIN28	lin-28 homolog (C. elegans)			NCOA2	nuclear receptor coactivator 2			CNOT2	CCR4-NOT transcription complex, subunit 2	KCNAB1	potassium voltage-gated channel, shaker-related subfamily, beta member 1			ONECUT2	one cut homeobox 2	AKAP6	A kinase (PRKA) anchor protein 6	RER1	RER1 retention in endoplasmic reticulum 1 homolog (S. cerevisiae)					ZMIZ2	zinc finger, MIZ-type containing 2	CPSF2	cleavage and polyadenylation specific factor 2, 100kDa			CXCL12	chemokine (C-X-C motif) ligand 12 (stromal cell-derived factor 1)	NAT13	N-acetyltransferase 13			TPPP3	tubulin polymerization-promoting protein family member 3	CEP350	centrosomal protein 350kDa	ARHGEF9	Cdc42 guanine nucleotide exchange factor (GEF) 9	CNOT6L	CCR4-NOT transcription complex, subunit 6-like	DHDDS	dehydrodolichyl diphosphate synthase
TXNDC5	thioredoxin domain containing 5	KLHL18	kelch-like 18 (Drosophila)	POU4F1	POU class 4 homeobox 1			ACSL4	acyl-CoA synthetase long-chain family member 4			C21orf91	chromosome 21 open reading frame 91	ATXN7L3	ataxin 7-like 3			OGT	O-linked N-acetylglucosamine (GlcNAc) transferase (UDP-N-acetylglucosamine:polypeptide-N-acetylglucosaminyl transferase)	JOSD1	Josephin domain containing 1	KIAA2018	KIAA2018					CALCR	calcitonin receptor	ZBED4	zinc finger, BED-type containing 4			NDEL1	nudE nuclear distribution gene E homolog (A. nidulans)-like 1	TET2	tet oncogene family member 2			SORT1	sortilin 1	NIPBL	Nipped-B homolog (Drosophila)	SUPT16H	suppressor of Ty 16 homolog (S. cerevisiae)	ID2	inhibitor of DNA binding 2, dominant negative helix-loop-helix protein	CAPRIN1	cell cycle associated protein 1
ZAK	sterile alpha motif and leucine zipper containing kinase AZK	XPNPEP1	X-prolyl aminopeptidase (aminopeptidase P) 1, soluble	SMCHD1	structural maintenance of chromosomes flexible hinge domain containing 1			RNASE11	ribonuclease, RNase A family, 11 (non-active)			GABRB2	gamma-aminobutyric acid (GABA) A receptor, beta 2	NUP153	nucleoporin 153kDa			RPS6KB1	ribosomal protein S6 kinase, 70kDa, polypeptide 1	ZBTB40	zinc finger and BTB domain containing 40	MGC33894	transcript expressed during hematopoiesis 2					AKIRIN1	akirin 1	TNRC6B	trinucleotide repeat containing 6B			LRP2BP	LRP2 binding protein	ZBTB47	zinc finger and BTB domain containing 47			MEX3A	mex-3 homolog A (C. elegans)	CDRT4	CMT1A duplicated region transcript 4	FAM38B	family with sequence similarity 38, member B	JPH3	junctophilin 3	HLTF	helicase-like transcription factor
SASH1	SAM and SH3 domain containing 1	HRB	HIV-1 Rev binding protein	SORBS1	sorbin and SH3 domain containing 1			FAM176A	family with sequence similarity 176, member A			CRHR1	corticotropin releasing hormone receptor 1	BAHD1	bromo adjacent homology domain containing 1			SFTPH	surfactant associated protein H	BCL2L1	BCL2-like 1	ACVR2B	activin A receptor, type IIB					CCNL2	cyclin L2	THAP2	THAP domain containing, apoptosis associated protein 2			YLPM1	YLP motif containing 1	KIAA1539	KIAA1539			CXorf1	chromosome X open reading frame 1	FBXO6	F-box protein 6	CASD1	CAS1 domain containing 1	PI4K2A	phosphatidylinositol 4-kinase type 2 alpha	RBM24	RNA binding motif protein 24
C6orf120	chromosome 6 open reading frame 120	FAM76A	family with sequence similarity 76, member A	TNPO3	transportin 3			FXR2	fragile X mental retardation, autosomal homolog 2			UBR5	ubiquitin protein ligase E3 component n-recognin 5	TEAD1	TEA domain family member 1 (SV40 transcriptional enhancer factor)			AFF2	AF4/FMR2 family, member 2	ILVBL	ilvB (bacterial acetolactate synthase)-like	ITGA4	integrin, alpha 4 (antigen CD49D, alpha 4 subunit of VLA-4 receptor)					BLCAP	bladder cancer associated protein	ARPP-19	cyclic AMP phosphoprotein, 19 kD			DLG3	discs, large homolog 3 (neuroendocrine-dlg, Drosophila)	ANKRD54	ankyrin repeat domain 54			CAMKK1	calcium/calmodulin-dependent protein kinase kinase 1, alpha	ANKRD52	ankyrin repeat domain 52	CAMTA1	calmodulin binding transcription activator 1	BAGE3	B melanoma antigen family, member 3	NRK	Nik related kinase
LDOC1	leucine zipper, down-regulated in cancer 1	ZNF507	zinc finger protein 507	SEMA5A	sema domain, seven thrombospondin repeats (type 1 and type 1-like), transmembrane domain (TM) and short cytoplasmic domain, (semaphorin) 5A			SGEF	Src homology 3 domain-containing guanine nucleotide exchange factor			BDH2	3-hydroxybutyrate dehydrogenase, type 2	NPAT	nuclear protein, ataxia-telangiectasia locus			SPIN1	spindlin 1	TSHZ3	teashirt zinc finger homeobox 3	TYSND1	trypsin domain containing 1					BMP1	bone morphogenetic protein 1	ZNF148	zinc finger protein 148			MST150	MSTP150	ZNRF1	zinc and ring finger 1			ZDHHC5	zinc finger, DHHC-type containing 5	KIF3B	kinesin family member 3B	FLRT2	fibronectin leucine rich transmembrane protein 2	BAGE2	B melanoma antigen family, member 2	SNX16	sorting nexin 16
LHFP	lipoma HMGIC fusion partner	METTL9	methyltransferase like 9	ZIC1	Zic family member 1 (odd-paired homolog, Drosophila)			PTPLB	protein tyrosine phosphatase-like (proline instead of catalytic arginine), member b			INOC1	INO80 complex homolog 1 (S. cerevisiae)	SH2B3	SH2B adaptor protein 3			C14orf4	chromosome 14 open reading frame 4	DCP1A	DCP1 decapping enzyme homolog A (S. cerevisiae)	CDC42SE1	CDC42 small effector 1					SEMA4F	sema domain, immunoglobulin domain (Ig), transmembrane domain (TM) and short cytoplasmic domain, (semaphorin) 4F	hCG_18385	similar to cAMP-regulated phosphoprotein			HIVEP2	human immunodeficiency virus type I enhancer binding protein 2	STAG2	stromal antigen 2			RNF5	ring finger protein 5	URM1	ubiquitin related modifier 1 homolog (S. cerevisiae)	GAS7	growth arrest-specific 7	RFX2	regulatory factor X, 2 (influences HLA class II expression)	TC2N	tandem C2 domains, nuclear
SENP1	SUMO1/sentrin specific peptidase 1	C14orf28	chromosome 14 open reading frame 28	VAPA	VAMP (vesicle-associated membrane protein)-associated protein A, 33kDa			STAG2	stromal antigen 2			CDH13	cadherin 13, H-cadherin (heart)	SLC38A2	solute carrier family 38, member 2			ZFAND3	zinc finger, AN1-type domain 3	HPCAL4	hippocalcin like 4	NSUN4	NOL1/NOP2/Sun domain family, member 4					ARF5	ADP-ribosylation factor 5	JHDM1D	jumonji C domain containing histone demethylase 1 homolog D (S. cerevisiae)			CCL20	chemokine (C-C motif) ligand 20	MED29	mediator complex subunit 29			OTUD5	OTU domain containing 5	PDAP1	PDGFA associated protein 1	PLS3	plastin 3 (T isoform)	PDE11A	phosphodiesterase 11A	MAGI1	membrane associated guanylate kinase, WW and PDZ domain containing 1
RPS6KA2	ribosomal protein S6 kinase, 90kDa, polypeptide 2	GABPA	GA binding protein transcription factor, alpha subunit 60kDa	CACNA1C	calcium channel, voltage-dependent, L type, alpha 1C subunit			CNTD1	cyclin N-terminal domain containing 1			GRIN3A	glutamate receptor, ionotropic, N-methyl-D-aspartate 3A	KIAA0240	KIAA0240			CAST	calpastatin	AMMECR1L	AMME chromosomal region gene 1-like	HCFC1	host cell factor C1 (VP16-accessory protein)					HS2ST1	heparan sulfate 2-O-sulfotransferase 1	FLJ20309	hypothetical protein FLJ20309			PFTK1	PFTAIRE protein kinase 1	SSH2	slingshot homolog 2 (Drosophila)			HOXA11	homeobox A11	TFAP2E	transcription factor AP-2 epsilon (activating enhancer binding protein 2 epsilon)	ILF2	interleukin enhancer binding factor 2, 45kDa	SYAP1	synapse associated protein 1, SAP47 homolog (Drosophila)	PFKM	phosphofructokinase, muscle
YWHAZ	tyrosine 3-monooxygenase/tryptophan 5-monooxygenase activation protein, zeta polypeptide	RP5-1022P6.2	hypothetical protein KIAA1434	EIF4E3	eukaryotic translation initiation factor 4E family member 3			KPNA1	karyopherin alpha 1 (importin alpha 5)			NCALD	neurocalcin delta	SGEF	Src homology 3 domain-containing guanine nucleotide exchange factor			SNX13	sorting nexin 13	AAK1	AP2 associated kinase 1	EFNB2	ephrin-B2					TGIF2	TGFB-induced factor homeobox 2	C15orf54	chromosome 15 open reading frame 54			ESRRG	estrogen-related receptor gamma	CTDSP1	CTD (carboxy-terminal domain, RNA polymerase II, polypeptide A) small phosphatase 1			STX17	syntaxin 17	RNF8	ring finger protein 8	EDARADD	EDAR-associated death domain	PMEPA1	prostate transmembrane protein, androgen induced 1	CHIC1	cysteine-rich hydrophobic domain 1
SSR3	signal sequence receptor, gamma (translocon-associated protein gamma)	MYO1E	myosin IE	NR3C2	nuclear receptor subfamily 3, group C, member 2			RNF144A	ring finger protein 144A			CRY2	cryptochrome 2 (photolyase-like)	HIPK1	homeodomain interacting protein kinase 1			HN1	hematological and neurological expressed 1	MRPS25	mitochondrial ribosomal protein S25	2010-09-04	septin 4					SSR2	signal sequence receptor, beta (translocon-associated protein beta)	FAM155A	family with sequence similarity 155, member A			SLC38A1	solute carrier family 38, member 1	SEC22B	SEC22 vesicle trafficking protein homolog B (S. cerevisiae)			GRIA4	glutamate receptor, ionotrophic, AMPA 4	KIAA0182	KIAA0182	SLC4A4	solute carrier family 4, sodium bicarbonate cotransporter, member 4	KPNA1	karyopherin alpha 1 (importin alpha 5)	CDC2L5	cell division cycle 2-like 5 (cholinesterase-related cell division controller)
SNF8	SNF8, ESCRT-II complex subunit, homolog (S. cerevisiae)	UBE2W	ubiquitin-conjugating enzyme E2W (putative)	MED1	mediator complex subunit 1			TMEM155	transmembrane protein 155			H3F3B	H3 histone, family 3B (H3.3B)	HIPK2	homeodomain interacting protein kinase 2			AAMP	angio-associated, migratory cell protein	ATP6V1C2	ATPase, H+ transporting, lysosomal 42kDa, V1 subunit C2	KCNJ12	potassium inwardly-rectifying channel, subfamily J, member 12					SFRS1	splicing factor, arginine/serine-rich 1 (splicing factor 2, alternate splicing factor)	C6orf195	chromosome 6 open reading frame 195			RBPMS2	RNA binding protein with multiple splicing 2	MAZ	MYC-associated zinc finger protein (purine-binding transcription factor)			BBC3	BCL2 binding component 3	RGAG1	retrotransposon gag domain containing 1	NR3C2	nuclear receptor subfamily 3, group C, member 2	SPATA2	spermatogenesis associated 2	ELL2	elongation factor, RNA polymerase II, 2
NUP50	nucleoporin 50kDa	PAPOLA	poly(A) polymerase alpha	FAM134A	family with sequence similarity 134, member A			TMEM161B	transmembrane protein 161B			FBXW11	F-box and WD repeat domain containing 11	LOC196993	hypothetical protein LOC196993			LMO3	LIM domain only 3 (rhombotin-like 2)	TET3	tet oncogene family member 3	COPS7B	COP9 constitutive photomorphogenic homolog subunit 7B (Arabidopsis)					SNX18	sorting nexin 18	GPR155	G protein-coupled receptor 155			SLC4A8	solute carrier family 4, sodium bicarbonate cotransporter, member 8	RASL10B	RAS-like, family 10, member B			DGKB	diacylglycerol kinase, beta 90kDa	DTX1	deltex homolog 1 (Drosophila)	MTA1	metastasis associated 1	C5orf41	chromosome 5 open reading frame 41	ALS2CR13	amyotrophic lateral sclerosis 2 (juvenile) chromosome region, candidate 13
2010-03-04	membrane-associated ring finger (C3HC4) 4	REEP3	receptor accessory protein 3	RPS6KA3	ribosomal protein S6 kinase, 90kDa, polypeptide 3			USP49	ubiquitin specific peptidase 49			MEX3B	mex-3 homolog B (C. elegans)	EIF2AK3	eukaryotic translation initiation factor 2-alpha kinase 3			CSDA	cold shock domain protein A	STX2	syntaxin 2	ZBTB34	zinc finger and BTB domain containing 34					ZNF192	zinc finger protein 192	MTF1	metal-regulatory transcription factor 1			CHD9	chromodomain helicase DNA binding protein 9	LMOD1	leiomodin 1 (smooth muscle)			TMEM132E	transmembrane protein 132E	TMIE	transmembrane inner ear	ANKRD17	ankyrin repeat domain 17	STAT5B	signal transducer and activator of transcription 5B	PHC1	polyhomeotic homolog 1 (Drosophila)
KCTD16	potassium channel tetramerisation domain containing 16	DOCK3	dedicator of cytokinesis 3	ENTPD1	ectonucleoside triphosphate diphosphohydrolase 1			FRMD6	FERM domain containing 6			LUC7L2	LUC7-like 2 (S. cerevisiae)	SYT11	synaptotagmin XI			PHC1	polyhomeotic homolog 1 (Drosophila)	HNRNPU	heterogeneous nuclear ribonucleoprotein U (scaffold attachment factor A)	PAX8	paired box 8					PRSS8	protease, serine, 8	NRIP3	nuclear receptor interacting protein 3			KCNN2	potassium intermediate/small conductance calcium-activated channel, subfamily N, member 2	PIK3R1	phosphoinositide-3-kinase, regulatory subunit 1 (alpha)			JMJD3	jumonji domain containing 3, histone lysine demethylase	HOXD13	homeobox D13	YTHDF1	YTH domain family, member 1	GOLT1A	golgi transport 1 homolog A (S. cerevisiae)	IPO5	importin 5
RPS6KA3	ribosomal protein S6 kinase, 90kDa, polypeptide 3	PHF20	PHD finger protein 20	P53AIP1	p53-regulated apoptosis-inducing protein 1			UBE2G1	ubiquitin-conjugating enzyme E2G 1 (UBC7 homolog, yeast)			ATP6V0A2	ATPase, H+ transporting, lysosomal V0 subunit a2	MLL2	myeloid/lymphoid or mixed-lineage leukemia 2			CPEB4	cytoplasmic polyadenylation element binding protein 4	LRP6	low density lipoprotein receptor-related protein 6	DSEL	dermatan sulfate epimerase-like					CDC42SE1	CDC42 small effector 1	CSNK1G1	casein kinase 1, gamma 1			KIAA1267	KIAA1267	FAM131A	family with sequence similarity 131, member A			GABRA4	gamma-aminobutyric acid (GABA) A receptor, alpha 4	C7orf41	chromosome 7 open reading frame 41	TIMP2	TIMP metallopeptidase inhibitor 2	WIPF2	WAS/WASL interacting protein family, member 2	NCAPD3	non-SMC condensin II complex, subunit D3
LIFR	leukemia inhibitory factor receptor alpha	KIAA0355	KIAA0355	HNRNPA3	heterogeneous nuclear ribonucleoprotein A3			CLLU1	chronic lymphocytic leukemia up-regulated 1			EIF5	eukaryotic translation initiation factor 5	CLLU1	chronic lymphocytic leukemia up-regulated 1			MUC1	mucin 1, cell surface associated	NDUFA4L2	NADH dehydrogenase (ubiquinone) 1 alpha subcomplex, 4-like 2	ZDHHC5	zinc finger, DHHC-type containing 5					CSRP2BP	CSRP2 binding protein	FRS2	fibroblast growth factor receptor substrate 2			IGBP1	immunoglobulin (CD79A) binding protein 1	CSMD2	CUB and Sushi multiple domains 2			BAGE3	B melanoma antigen family, member 3	AQP2	aquaporin 2 (collecting duct)	WWC2	WW and C2 domain containing 2	SLC25A25	solute carrier family 25 (mitochondrial carrier; phosphate carrier), member 25	MKLN1	muskelin 1, intracellular mediator containing kelch motifs
NAPEPLD	N-acyl phosphatidylethanolamine phospholipase D	PDE1B	phosphodiesterase 1B, calmodulin-dependent	tcag7.1228	hypothetical protein FLJ25778			TMEM182	transmembrane protein 182			KCTD12	potassium channel tetramerisation domain containing 12	AKAP6	A kinase (PRKA) anchor protein 6			CDC42	cell division cycle 42 (GTP binding protein, 25kDa)	ITCH	itchy E3 ubiquitin protein ligase homolog (mouse)	ZMIZ1	zinc finger, MIZ-type containing 1					EZR	ezrin	G6PC2	glucose-6-phosphatase, catalytic, 2			WDR68	WD repeat domain 68	POLDIP3	polymerase (DNA-directed), delta interacting protein 3			BAGE2	B melanoma antigen family, member 2	WHSC1	Wolf-Hirschhorn syndrome candidate 1	ARHGAP26	Rho GTPase activating protein 26	GDI1	GDP dissociation inhibitor 1	FAM152A	family with sequence similarity 152, member A
MRVI1	murine retrovirus integration site 1 homolog	PCGF3	polycomb group ring finger 3	MRPS25	mitochondrial ribosomal protein S25			KLHL28	kelch-like 28 (Drosophila)			DOCK3	dedicator of cytokinesis 3	LRRTM2	leucine rich repeat transmembrane neuronal 2			HOXD3	homeobox D3	PPFIA3	protein tyrosine phosphatase, receptor type, f polypeptide (PTPRF), interacting protein (liprin), alpha 3	ISL2	ISL LIM homeobox 2					TANC2	tetratricopeptide repeat, ankyrin repeat and coiled-coil containing 2	ZFPM2	zinc finger protein, multitype 2			AASDHPPT	aminoadipate-semialdehyde dehydrogenase-phosphopantetheinyl transferase	ZNF532	zinc finger protein 532			ANKRD52	ankyrin repeat domain 52	SFXN5	sideroflexin 5	UBE2B	ubiquitin-conjugating enzyme E2B (RAD6 homolog)	RFX5	regulatory factor X, 5 (influences HLA class II expression)	AK3L1	adenylate kinase 3-like 1
TCF4	transcription factor 4	BCL2	B-cell CLL/lymphoma 2	MDGA1	MAM domain containing glycosylphosphatidylinositol anchor 1			MBNL2	muscleblind-like 2 (Drosophila)			GPM6A	glycoprotein M6A	SLC17A8	solute carrier family 17 (sodium-dependent inorganic phosphate cotransporter), member 8			IL11RA	interleukin 11 receptor, alpha	GABBR2	gamma-aminobutyric acid (GABA) B receptor, 2	GPRIN3	GPRIN family member 3					FBXL19	F-box and leucine-rich repeat protein 19	SPOCK1	sparc/osteonectin, cwcv and kazal-like domains proteoglycan (testican) 1			FOXN2	forkhead box N2	FIBCD1	fibrinogen C domain containing 1			GRIN2D	glutamate receptor, ionotropic, N-methyl D-aspartate 2D	7A5	putative binding protein 7a5	TSN	translin	ARMC5	armadillo repeat containing 5	MED21	mediator complex subunit 21
SEMA6A	sema domain, transmembrane domain (TM), and cytoplasmic domain, (semaphorin) 6A	EPB41	erythrocyte membrane protein band 4.1 (elliptocytosis 1, RH-linked)	DDX6	DEAD (Asp-Glu-Ala-Asp) box polypeptide 6			AFF4	AF4/FMR2 family, member 4			BNIP2	BCL2/adenovirus E1B 19kDa interacting protein 2	FAM29A	family with sequence similarity 29, member A			LOC643751	cell division cycle 42 pseudogene	SGK269	NKF3 kinase family member	TLK2	tousled-like kinase 2					ZNF385A	zinc finger protein 385A	NEUROD4	neurogenic differentiation 4			CUGBP2	CUG triplet repeat, RNA binding protein 2	RGS14	regulator of G-protein signaling 14			KCNMA1	potassium large conductance calcium-activated channel, subfamily M, alpha member 1	KCTD20	potassium channel tetramerisation domain containing 20	IGSF3	immunoglobulin superfamily, member 3	XPNPEP1	X-prolyl aminopeptidase (aminopeptidase P) 1, soluble	TANC2	tetratricopeptide repeat, ankyrin repeat and coiled-coil containing 2
MECP2	methyl CpG binding protein 2 (Rett syndrome)	TGFBR1	transforming growth factor, beta receptor I (activin A receptor type II-like kinase, 53kDa)	JHDM1D	jumonji C domain containing histone demethylase 1 homolog D (S. cerevisiae)			IRAK2	interleukin-1 receptor-associated kinase 2			JARID1B	jumonji, AT rich interactive domain 1B	MAFK	v-maf musculoaponeurotic fibrosarcoma oncogene homolog K (avian)			MORF4L1	mortality factor 4 like 1	KCTD11	potassium channel tetramerisation domain containing 11	SMG5	Smg-5 homolog, nonsense mediated mRNA decay factor (C. elegans)					ARHGAP26	Rho GTPase activating protein 26	APOLD1	apolipoprotein L domain containing 1			TET2	tet oncogene family member 2	ASNA1	arsA arsenite transporter, ATP-binding, homolog 1 (bacterial)			PFKFB4	6-phosphofructo-2-kinase/fructose-2,6-biphosphatase 4	NEO1	neogenin homolog 1 (chicken)	DDX17	DEAD (Asp-Glu-Ala-Asp) box polypeptide 17	H3F3B	H3 histone, family 3B (H3.3B)	TANC1	tetratricopeptide repeat, ankyrin repeat and coiled-coil containing 1
HOXA10	homeobox A10	RAG1	recombination activating gene 1	RIMS3	regulating synaptic membrane exocytosis 3			GOLGA1	golgi autoantigen, golgin subfamily a, 1			RCC2	regulator of chromosome condensation 2	SLITRK5	SLIT and NTRK-like family, member 5			IL10RB	interleukin 10 receptor, beta	SLC22A3	solute carrier family 22 (extraneuronal monoamine transporter), member 3	NGFR	nerve growth factor receptor (TNFR superfamily, member 16)					ZHX2	zinc fingers and homeoboxes 2	TMEM200B	transmembrane protein 200B			MAML3	mastermind-like 3 (Drosophila)	RGL2	ral guanine nucleotide dissociation stimulator-like 2			ZNF385A	zinc finger protein 385A	PSCD1	pleckstrin homology, Sec7 and coiled-coil domains 1(cytohesin 1)	LDB2	LIM domain binding 2	MYST3	MYST histone acetyltransferase (monocytic leukemia) 3	TMEM106B	transmembrane protein 106B
TBX15	T-box 15	NFKBIZ	nuclear factor of kappa light polypeptide gene enhancer in B-cells inhibitor, zeta	GPS2	G protein pathway suppressor 2			BPTF	bromodomain PHD finger transcription factor			C15orf27	chromosome 15 open reading frame 27	LPIN2	lipin 2			DCX	doublecortex; lissencephaly, X-linked (doublecortin)	TRAF4	TNF receptor-associated factor 4	STXBP4	syntaxin binding protein 4					SMG5	Smg-5 homolog, nonsense mediated mRNA decay factor (C. elegans)	TXNDC1	thioredoxin domain containing 1			SFRS1	splicing factor, arginine/serine-rich 1 (splicing factor 2, alternate splicing factor)	RXRB	retinoid X receptor, beta			ZDHHC21	zinc finger, DHHC-type containing 21	SUPT16H	suppressor of Ty 16 homolog (S. cerevisiae)	JHDM1D	jumonji C domain containing histone demethylase 1 homolog D (S. cerevisiae)	RC3H1	ring finger and CCCH-type zinc finger domains 1	DAZAP1	DAZ associated protein 1
GRIK2	glutamate receptor, ionotropic, kainate 2	RNF44	ring finger protein 44	RANBP10	RAN binding protein 10			ATF7IP	activating transcription factor 7 interacting protein			MAPK9	mitogen-activated protein kinase 9	METAP2	methionyl aminopeptidase 2			RAPGEF2	Rap guanine nucleotide exchange factor (GEF) 2	ZNF385A	zinc finger protein 385A	FCHSD1	FCH and double SH3 domains 1					TMEM155	transmembrane protein 155	TSPAN12	tetraspanin 12			ZDHHC21	zinc finger, DHHC-type containing 21	UBTF	upstream binding transcription factor, RNA polymerase I			C16orf72	chromosome 16 open reading frame 72	UCN2	urocortin 2	TTBK2	tau tubulin kinase 2	SGIP1	SH3-domain GRB2-like (endophilin) interacting protein 1	RANBP2	RAN binding protein 2
ARF1	ADP-ribosylation factor 1	KLF13	Kruppel-like factor 13	BACE1	beta-site APP-cleaving enzyme 1			CALM2	calmodulin 2 (phosphorylase kinase, delta)			DPYSL3	dihydropyrimidinase-like 3	ADAMTS6	ADAM metallopeptidase with thrombospondin type 1 motif, 6			OXSR1	oxidative-stress responsive 1	ATXN7L3	ataxin 7-like 3	MTMR3	myotubularin related protein 3					C16orf5	chromosome 16 open reading frame 5	ZRANB1	zinc finger, RAN-binding domain containing 1			REG3G	regenerating islet-derived 3 gamma	LIF	leukemia inhibitory factor (cholinergic differentiation factor)			C22orf9	chromosome 22 open reading frame 9	SLC24A3	solute carrier family 24 (sodium/potassium/calcium exchanger), member 3	GSPT1	G1 to S phase transition 1	RORC	RAR-related orphan receptor C	BVES	blood vessel epicardial substance
SH3TC2	SH3 domain and tetratricopeptide repeats 2	CENTG1	centaurin, gamma 1	C14orf43	chromosome 14 open reading frame 43			KHDRBS1	KH domain containing, RNA binding, signal transduction associated 1			CBLN2	cerebellin 2 precursor	ADRB1	adrenergic, beta-1-, receptor			IGFBP5	insulin-like growth factor binding protein 5	GLS	glutaminase	ZNF192	zinc finger protein 192					KCTD15	potassium channel tetramerisation domain containing 15	C10orf118	chromosome 10 open reading frame 118			ENAH	enabled homolog (Drosophila)	FURIN	furin (paired basic amino acid cleaving enzyme)			CHMP7	CHMP family, member 7	SLC35F1	solute carrier family 35, member F1	THAP2	THAP domain containing, apoptosis associated protein 2	PLA2G4F	phospholipase A2, group IVF	XIAP	X-linked inhibitor of apoptosis
KIAA1787	KIAA1787 protein	SPOPL	speckle-type POZ protein-like	PBX2	pre-B-cell leukemia homeobox 2			ANKFY1	ankyrin repeat and FYVE domain containing 1			AHCYL1	S-adenosylhomocysteine hydrolase-like 1	NUP50	nucleoporin 50kDa			FBXW7	F-box and WD repeat domain containing 7			TNNI1	troponin I type 1 (skeletal, slow)					PCBP4	poly(rC) binding protein 4	KRIT1	KRIT1, ankyrin repeat containing			TNRC6B	trinucleotide repeat containing 6B	PTRF	polymerase I and transcript release factor			RGMB	RGM domain family, member B	TBC1D1	TBC1 (tre-2/USP6, BUB2, cdc16) domain family, member 1	PTGER2	prostaglandin E receptor 2 (subtype EP2), 53kDa	TBKBP1	TBK1 binding protein 1	TMEM64	transmembrane protein 64
SOCS3	suppressor of cytokine signaling 3	FAM131B	family with sequence similarity 131, member B	SOCS3	suppressor of cytokine signaling 3			CDKN2B	cyclin-dependent kinase inhibitor 2B (p15, inhibits CDK4)			CCDC93	coiled-coil domain containing 93	ABHD2	abhydrolase domain containing 2			TSC22D3	TSC22 domain family, member 3									TMCO2	transmembrane and coiled-coil domains 2	EBF3	early B-cell factor 3			KPNA1	karyopherin alpha 1 (importin alpha 5)	KIRREL	kin of IRRE like (Drosophila)			C16orf57	chromosome 16 open reading frame 57	ADIPOR1	adiponectin receptor 1	QKI	quaking homolog, KH domain RNA binding (mouse)	CHST3	carbohydrate (chondroitin 6) sulfotransferase 3	EGR3	early growth response 3
ITSN1	intersectin 1 (SH3 domain protein)	KLHL3	kelch-like 3 (Drosophila)	PRX	periaxin			MOBKL2B	MOB1, Mps One Binder kinase activator-like 2B (yeast)			MINK1	misshapen-like kinase 1 (zebrafish)	CLASP1	cytoplasmic linker associated protein 1			SAPS2	SAPS domain family, member 2									2010-03-09	membrane-associated ring finger (C3HC4) 9	SEC62	SEC62 homolog (S. cerevisiae)			POLR2J3	RPB11b2 protein	EPHB4	EPH receptor B4			NUMBL	numb homolog (Drosophila)-like	MECP2	methyl CpG binding protein 2 (Rett syndrome)	C9orf5	chromosome 9 open reading frame 5	YTHDC1	YTH domain containing 1	CYLD	cylindromatosis (turban tumor syndrome)
DPY19L3	dpy-19-like 3 (C. elegans)	BAT2D1	BAT2 domain containing 1	FBXO41	F-box protein 41			MTMR4	myotubularin related protein 4			TENC1	tensin like C1 domain containing phosphatase (tensin 2)	EIF2C1	eukaryotic translation initiation factor 2C, 1			CAMK2G	calcium/calmodulin-dependent protein kinase (CaM kinase) II gamma											PURB	purine-rich element binding protein B					LRRC4	leucine rich repeat containing 4			GRID1	glutamate receptor, ionotropic, delta 1	PADI2	peptidyl arginine deiminase, type II	RUNX1T1	runt-related transcription factor 1; translocated to, 1 (cyclin D-related)	CCDC122	coiled-coil domain containing 122	GNAI1	guanine nucleotide binding protein (G protein), alpha inhibiting activity polypeptide 1
EPB41L1	erythrocyte membrane protein band 4.1-like 1	TGFBR3	transforming growth factor, beta receptor III	C2CD2L	C2CD2-like			FAM131B	family with sequence similarity 131, member B			EIF5A2	eukaryotic translation initiation factor 5A2	NEO1	neogenin homolog 1 (chicken)			AGPAT3	1-acylglycerol-3-phosphate O-acyltransferase 3											SFXN5	sideroflexin 5					VDR	vitamin D (1,25- dihydroxyvitamin D3) receptor			SP1	Sp1 transcription factor	FKBP4	FK506 binding protein 4, 59kDa	EDEM3	ER degradation enhancer, mannosidase alpha-like 3	SGPL1	sphingosine-1-phosphate lyase 1	RASA1	RAS p21 protein activator (GTPase activating protein) 1
PHF15	PHD finger protein 15	CD3G	CD3g molecule, gamma (CD3-TCR complex)	MTF1	metal-regulatory transcription factor 1			KLF9	Kruppel-like factor 9			FBXO33	F-box protein 33	ARHGAP24	Rho GTPase activating protein 24			RBM24	RNA binding motif protein 24											FAM173B	family with sequence similarity 173, member B					MTMR3	myotubularin related protein 3			SCUBE3	signal peptide, CUB domain, EGF-like 3	CD59	CD59 molecule, complement regulatory protein	SYT14L	synaptotagmin XIV-like	TRAM2	translocation associated membrane protein 2	NUFIP2	nuclear fragile X mental retardation protein interacting protein 2
TMEM178	transmembrane protein 178	TEAD1	TEA domain family member 1 (SV40 transcriptional enhancer factor)	MARK4	MAP/microtubule affinity-regulating kinase 4			KLHDC8A	kelch domain containing 8A			MARCKS	myristoylated alanine-rich protein kinase C substrate	CAV1	caveolin 1, caveolae protein, 22kDa			LASP1	LIM and SH3 protein 1											TCEAL1	transcription elongation factor A (SII)-like 1					GDE1	glycerophosphodiester phosphodiesterase 1			BAHCC1	BAH domain and coiled-coil containing 1	DLX6	distal-less homeobox 6	FRAP1	FK506 binding protein 12-rapamycin associated protein 1	WDR5	WD repeat domain 5	HIVEP2	human immunodeficiency virus type I enhancer binding protein 2
FAM78A	family with sequence similarity 78, member A	HSPA12A	heat shock 70kDa protein 12A	MAST3	microtubule associated serine/threonine kinase 3			EIF2C1	eukaryotic translation initiation factor 2C, 1			USP7	ubiquitin specific peptidase 7 (herpes virus-associated)	NTRK2	neurotrophic tyrosine kinase, receptor, type 2			CBX3	chromobox homolog 3 (HP1 gamma homolog, Drosophila)											RNF165	ring finger protein 165					ABCA1	ATP-binding cassette, sub-family A (ABC1), member 1			KCTD15	potassium channel tetramerisation domain containing 15	SEMA3G	sema domain, immunoglobulin domain (Ig), short basic domain, secreted, (semaphorin) 3G	NFIB	nuclear factor I/B	DIAPH2	diaphanous homolog 2 (Drosophila)	N4BP1	NEDD4 binding protein 1
FAM123A	family with sequence similarity 123A	C1orf122	chromosome 1 open reading frame 122	MEF2D	myocyte enhancer factor 2D			C5orf23	chromosome 5 open reading frame 23			LCOR	ligand dependent nuclear receptor corepressor	DLG3	discs, large homolog 3 (neuroendocrine-dlg, Drosophila)			SERBP1	SERPINE1 mRNA binding protein 1											TXLNB	taxilin beta					C10orf46	chromosome 10 open reading frame 46			MLLT6	myeloid/lymphoid or mixed-lineage leukemia (trithorax homolog, Drosophila); translocated to, 6	ZNF362	zinc finger protein 362	SNX1	sorting nexin 1	HM13	histocompatibility (minor) 13	COPS2	COP9 constitutive photomorphogenic homolog subunit 2 (Arabidopsis)
SYS1	SYS1 Golgi-localized integral membrane protein homolog (S. cerevisiae)	MKRN1	makorin, ring finger protein, 1	RAD23A	RAD23 homolog A (S. cerevisiae)			GALNT13	UDP-N-acetyl-alpha-D-galactosamine:polypeptide N-acetylgalactosaminyltransferase 13 (GalNAc-T13)			IPO5	importin 5	JARID2	jumonji, AT rich interactive domain 2			TMED10	transmembrane emp24-like trafficking protein 10 (yeast)											ATP6V1A	ATPase, H+ transporting, lysosomal 70kDa, V1 subunit A					SUMF1	sulfatase modifying factor 1			GIGYF1	GRB10 interacting GYF protein 1	ZIC4	Zic family member 4	C10orf119	chromosome 10 open reading frame 119	UNKL	unkempt homolog (Drosophila)-like	PCDH19	protocadherin 19
PDE12	phosphodiesterase 12	AQP2	aquaporin 2 (collecting duct)					C14orf147	chromosome 14 open reading frame 147			SFRS2B	splicing factor, arginine/serine-rich 2B	CTNND2	catenin (cadherin-associated protein), delta 2 (neural plakophilin-related arm-repeat protein)			TRAM2	translocation associated membrane protein 2											ARHGAP26	Rho GTPase activating protein 26					OLA1	Obg-like ATPase 1			UBTF	upstream binding transcription factor, RNA polymerase I	KIAA1539	KIAA1539	NMB	neuromedin B	PDCD6IP	programmed cell death 6 interacting protein	SFRS7	splicing factor, arginine/serine-rich 7, 35kDa
ABCG4	ATP-binding cassette, sub-family G (WHITE), member 4	SOX11	SRY (sex determining region Y)-box 11					STK3	serine/threonine kinase 3 (STE20 homolog, yeast)			PSD2	pleckstrin and Sec7 domain containing 2	EBF1	early B-cell factor 1			CCND2	cyclin D2											C9orf82	chromosome 9 open reading frame 82					OAF	OAF homolog (Drosophila)			RHO	rhodopsin	CHRM1	cholinergic receptor, muscarinic 1	SRI	sorcin	C9orf58	chromosome 9 open reading frame 58	TFAP2B	transcription factor AP-2 beta (activating enhancer binding protein 2 beta)
SV2B	synaptic vesicle glycoprotein 2B	PHC2	polyhomeotic homolog 2 (Drosophila)					SRGAP1	SLIT-ROBO Rho GTPase activating protein 1			SV2B	synaptic vesicle glycoprotein 2B	GPR109B	G protein-coupled receptor 109B			NFYB	nuclear transcription factor Y, beta											RNUXA	RNA U, small nuclear RNA export adaptor (phosphorylation regulated)					FAM131B	family with sequence similarity 131, member B			CNTFR	ciliary neurotrophic factor receptor	EBF1	early B-cell factor 1	SYT14	synaptotagmin XIV	SH2B3	SH2B adaptor protein 3	PUS7	pseudouridylate synthase 7 homolog (S. cerevisiae)
RANBP10	RAN binding protein 10	AMBRA1	autophagy/beclin-1 regulator 1					MLL2	myeloid/lymphoid or mixed-lineage leukemia 2			SYDE1	synapse defective 1, Rho GTPase, homolog 1 (C. elegans)	GPR109A	G protein-coupled receptor 109A			KCNJ12	potassium inwardly-rectifying channel, subfamily J, member 12											MKL2	MKL/myocardin-like 2					DAG1	dystroglycan 1 (dystrophin-associated glycoprotein 1)			ZNF740	zinc finger protein 740	FZD8	frizzled homolog 8 (Drosophila)	NCAM1	neural cell adhesion molecule 1	JMJD5	jumonji domain containing 5	LHFPL3	lipoma HMGIC fusion partner-like 3
ZNF605	zinc finger protein 605	EFNB1	ephrin-B1					SH3TC2	SH3 domain and tetratricopeptide repeats 2			SNTA1	syntrophin, alpha 1 (dystrophin-associated protein A1, 59kDa, acidic component)	BACH2	BTB and CNC homology 1, basic leucine zipper transcription factor 2			TUSC2	tumor suppressor candidate 2											FRAS1	Fraser syndrome 1					EP300	E1A binding protein p300			ADRBK1	adrenergic, beta, receptor kinase 1	PKM2	pyruvate kinase, muscle	KIAA1553	KIAA1553	DLC1	deleted in liver cancer 1	KCNS3	potassium voltage-gated channel, delayed-rectifier, subfamily S, member 3
NRN1	neuritin 1	IGSF3	immunoglobulin superfamily, member 3					COL12A1	collagen, type XII, alpha 1			NAV3	neuron navigator 3	CPLX2	complexin 2			AATK	apoptosis-associated tyrosine kinase											ING3	inhibitor of growth family, member 3					KLF12	Kruppel-like factor 12			LHFPL4	lipoma HMGIC fusion partner-like 4	MTMR3	myotubularin related protein 3	tcag7.1228	hypothetical protein FLJ25778	C6orf106	chromosome 6 open reading frame 106	MRPL22	mitochondrial ribosomal protein L22
DCLK1	doublecortin-like kinase 1	MED9	mediator complex subunit 9					OXNAD1	oxidoreductase NAD-binding domain containing 1			FLJ21865	endo-beta-N-acetylglucosaminidase	CREB5	cAMP responsive element binding protein 5			HIF1AN	hypoxia-inducible factor 1, alpha subunit inhibitor											ZKSCAN1	zinc finger with KRAB and SCAN domains 1					PLEKHA6	pleckstrin homology domain containing, family A member 6			ERC1	ELKS/RAB6-interacting/CAST family member 1	IGSF9B	immunoglobulin superfamily, member 9B	MEF2D	myocyte enhancer factor 2D	KCNA1	potassium voltage-gated channel, shaker-related subfamily, member 1 (episodic ataxia with myokymia)	ZC3H7B	zinc finger CCCH-type containing 7B
TCF20	transcription factor 20 (AR1)	CROP	cisplatin resistance-associated overexpressed protein					RBM17	RNA binding motif protein 17			ANKRD17	ankyrin repeat domain 17	TLK2	tousled-like kinase 2			C16orf72	chromosome 16 open reading frame 72											F8	coagulation factor VIII, procoagulant component (hemophilia A)					MTHFR	5,10-methylenetetrahydrofolate reductase (NADPH)			SBK1	SH3-binding domain kinase 1	PAPOLB	poly(A) polymerase beta (testis specific)	BMF	Bcl2 modifying factor	CNTNAP2	contactin associated protein-like 2	PI15	peptidase inhibitor 15
MDGA1	MAM domain containing glycosylphosphatidylinositol anchor 1	MARCKS	myristoylated alanine-rich protein kinase C substrate					TPRG1	tumor protein p63 regulated 1			PTPRN	protein tyrosine phosphatase, receptor type, N	ZBTB40	zinc finger and BTB domain containing 40			NUP160	nucleoporin 160kDa											JTB	jumping translocation breakpoint					ARHGEF6	Rac/Cdc42 guanine nucleotide exchange factor (GEF) 6			ITGA3	integrin, alpha 3 (antigen CD49C, alpha 3 subunit of VLA-3 receptor)	CACNA1C	calcium channel, voltage-dependent, L type, alpha 1C subunit	ELAVL2	ELAV (embryonic lethal, abnormal vision, Drosophila)-like 2 (Hu antigen B)	PTPRD	protein tyrosine phosphatase, receptor type, D	PTEN	phosphatase and tensin homolog (mutated in multiple advanced cancers 1)
RIMS1	regulating synaptic membrane exocytosis 1	FOXJ1	forkhead box J1					CCDC4	coiled-coil domain containing 4			NFASC	neurofascin homolog (chicken)	TMEM182	transmembrane protein 182			MPDU1	mannose-P-dolichol utilization defect 1											WDR44	WD repeat domain 44					ADAMTS5	ADAM metallopeptidase with thrombospondin type 1 motif, 5 (aggrecanase-2)			ZER1	zer-1 homolog (C. elegans)	TMEM184B	transmembrane protein 184B	SGIP1	SH3-domain GRB2-like (endophilin) interacting protein 1	MED26	mediator complex subunit 26	DHX15	DEAH (Asp-Glu-Ala-His) box polypeptide 15
MST150	MSTP150	ARHGEF12	Rho guanine nucleotide exchange factor (GEF) 12					CHUK	conserved helix-loop-helix ubiquitous kinase			BRUNOL6	bruno-like 6, RNA binding protein (Drosophila)	NFIB	nuclear factor I/B			RAB15	RAB15, member RAS onocogene family											CUGBP2	CUG triplet repeat, RNA binding protein 2					OTUD4	OTU domain containing 4			ADCY1	adenylate cyclase 1 (brain)	CHD2	chromodomain helicase DNA binding protein 2	DLX3	distal-less homeobox 3	UCRC	ubiquinol-cytochrome c reductase complex (7.2 kD)	KDSR	3-ketodihydrosphingosine reductase
TMEM68	transmembrane protein 68	L2HGDH	L-2-hydroxyglutarate dehydrogenase					RPS6KB1	ribosomal protein S6 kinase, 70kDa, polypeptide 1			ACVR1B	activin A receptor, type IB	HNRNPA3	heterogeneous nuclear ribonucleoprotein A3			HMGN2	high-mobility group nucleosomal binding domain 2											LAMA4	laminin, alpha 4					SCN1B	sodium channel, voltage-gated, type I, beta			SHMT2	serine hydroxymethyltransferase 2 (mitochondrial)	GALM	galactose mutarotase (aldose 1-epimerase)	GJC1	gap junction protein, gamma 1, 45kDa	S1PR2	sphingosine-1-phosphate receptor 2	USP46	ubiquitin specific peptidase 46
PRKCE	protein kinase C, epsilon	SAMD5	sterile alpha motif domain containing 5					CREBBP	CREB binding protein (Rubinstein-Taybi syndrome)			CECR6	cat eye syndrome chromosome region, candidate 6	CNOT2	CCR4-NOT transcription complex, subunit 2			FAM102A	family with sequence similarity 102, member A											GPR180	G protein-coupled receptor 180					PHLDA1	pleckstrin homology-like domain, family A, member 1			CABP1	calcium binding protein 1	CD72	CD72 molecule	SP3	Sp3 transcription factor	CCND1	cyclin D1	FAM160B1	family with sequence similarity 160, member B1
EMX2	empty spiracles homeobox 2	RFX5	regulatory factor X, 5 (influences HLA class II expression)					FBXO45	F-box protein 45			PNOC	prepronociceptin	PURB	purine-rich element binding protein B			ZFPM2	zinc finger protein, multitype 2											VSIG1	V-set and immunoglobulin domain containing 1					CERK	ceramide kinase			GAPVD1	GTPase activating protein and VPS9 domains 1	IGSF1	immunoglobulin superfamily, member 1	PDE4B	phosphodiesterase 4B, cAMP-specific (phosphodiesterase E4 dunce homolog, Drosophila)	ZFHX4	zinc finger homeobox 4	PRKAG2	protein kinase, AMP-activated, gamma 2 non-catalytic subunit
CENTG2	centaurin, gamma 2	FAM178A	family with sequence similarity 178, member A					LRFN1	leucine rich repeat and fibronectin type III domain containing 1			FKBP4	FK506 binding protein 4, 59kDa	FAM126B	family with sequence similarity 126, member B			CHMP6	chromatin modifying protein 6											RAP1A	RAP1A, member of RAS oncogene family					B4GALNT1	beta-1,4-N-acetyl-galactosaminyl transferase 1			CDC42BPG	CDC42 binding protein kinase gamma (DMPK-like)	CBFA2T2	core-binding factor, runt domain, alpha subunit 2; translocated to, 2	KIF3C	kinesin family member 3C	SCN4A	sodium channel, voltage-gated, type IV, alpha subunit	TNPO1	transportin 1
UBE2E2	ubiquitin-conjugating enzyme E2E 2 (UBC4/5 homolog, yeast)	ZBTB47	zinc finger and BTB domain containing 47					GLIPR1	GLI pathogenesis-related 1 (glioma)			GUCA1B	guanylate cyclase activator 1B (retina)	DGCR2	DiGeorge syndrome critical region gene 2			ATG2B	ATG2 autophagy related 2 homolog B (S. cerevisiae)											MYLK4	myosin light chain kinase family, member 4					MEF2D	myocyte enhancer factor 2D					PVRL2	poliovirus receptor-related 2 (herpesvirus entry mediator B)	FGF13	fibroblast growth factor 13	HOXA3	homeobox A3	TSC1	tuberous sclerosis 1
UNK	unkempt homolog (Drosophila)	ELK1	ELK1, member of ETS oncogene family					LPP	LIM domain containing preferred translocation partner in lipoma			MRPS10	mitochondrial ribosomal protein S10	PLAGL2	pleiomorphic adenoma gene-like 2			CTNS	cystinosis, nephropathic											PPP4R1	protein phosphatase 4, regulatory subunit 1					GCH1	GTP cyclohydrolase 1 (dopa-responsive dystonia)					IGF2BP3	insulin-like growth factor 2 mRNA binding protein 3	FRS3	fibroblast growth factor receptor substrate 3	KCTD12	potassium channel tetramerisation domain containing 12	PAN3	PAN3 polyA specific ribonuclease subunit homolog (S. cerevisiae)
CALU	calumenin	SLC39A14	solute carrier family 39 (zinc transporter), member 14					SRGAP2	SLIT-ROBO Rho GTPase activating protein 2			ELAVL3	ELAV (embryonic lethal, abnormal vision, Drosophila)-like 3 (Hu antigen C)	CUGBP2	CUG triplet repeat, RNA binding protein 2			GNPNAT1	glucosamine-phosphate N-acetyltransferase 1											ASXL3	additional sex combs like 3 (Drosophila)					CDS2	CDP-diacylglycerol synthase (phosphatidate cytidylyltransferase) 2					LIN28	lin-28 homolog (C. elegans)	KRAS	v-Ki-ras2 Kirsten rat sarcoma viral oncogene homolog	MDGA1	MAM domain containing glycosylphosphatidylinositol anchor 1	MN1	meningioma (disrupted in balanced translocation) 1
ITM2C	integral membrane protein 2C	RNF144A	ring finger protein 144A					TMCC1	transmembrane and coiled-coil domain family 1			EPB41L1	erythrocyte membrane protein band 4.1-like 1	PRKCE	protein kinase C, epsilon			PLSCR3	phospholipid scramblase 3											CYP19A1	cytochrome P450, family 19, subfamily A, polypeptide 1					ATP8B4	ATPase, class I, type 8B, member 4					DDX6	DEAD (Asp-Glu-Ala-Asp) box polypeptide 6	SEPHS1	selenophosphate synthetase 1	HMG20A	high-mobility group 20A	GOLGA1	golgi autoantigen, golgin subfamily a, 1
HP1BP3	heterochromatin protein 1, binding protein 3	LIN28	lin-28 homolog (C. elegans)					AP3S1	adaptor-related protein complex 3, sigma 1 subunit			SRF	serum response factor (c-fos serum response element-binding transcription factor)	C9orf47	chromosome 9 open reading frame 47			ZMIZ1	zinc finger, MIZ-type containing 1											PAPOLB	poly(A) polymerase beta (testis specific)					C6orf218	chromosome 6 open reading frame 218					IHPK1	inositol hexaphosphate kinase 1	IPO5	importin 5	GRIK3	glutamate receptor, ionotropic, kainate 3	STAG2	stromal antigen 2
PTPRT	protein tyrosine phosphatase, receptor type, T	KIAA1853	KIAA1853					FAM168B	family with sequence similarity 168, member B			STUB1	STIP1 homology and U-box containing protein 1					CCDC4	coiled-coil domain containing 4											TMTC1	transmembrane and tetratricopeptide repeat containing 1					MINK1	misshapen-like kinase 1 (zebrafish)					TGIF2	TGFB-induced factor homeobox 2	ZNF148	zinc finger protein 148	FAM84B	family with sequence similarity 84, member B	RAI2	retinoic acid induced 2
LRIG1	leucine-rich repeats and immunoglobulin-like domains 1	BRPF3	bromodomain and PHD finger containing, 3					DPY19L2	dpy-19-like 2 (C. elegans)			GPATCH8	G patch domain containing 8					TFDP1	transcription factor Dp-1											PRKAG2	protein kinase, AMP-activated, gamma 2 non-catalytic subunit					CREBZF	CREB/ATF bZIP transcription factor					DKFZP564O0823	DKFZP564O0823 protein	KIAA1267	KIAA1267	ADAT2	adenosine deaminase, tRNA-specific 2, TAD2 homolog (S. cerevisiae)	MRFAP1	Mof4 family associated protein 1
NCAN	neurocan	TRAF7	TNF receptor-associated factor 7					STEAP4	STEAP family member 4			ANKRD52	ankyrin repeat domain 52					RYBP	RING1 and YY1 binding protein											SMARCAD1	SWI/SNF-related, matrix-associated actin-dependent regulator of chromatin, subfamily a, containing DEAD/H box 1					KIAA0182	KIAA0182					SEC62	SEC62 homolog (S. cerevisiae)	GRIA4	glutamate receptor, ionotrophic, AMPA 4	SEC14L5	SEC14-like 5 (S. cerevisiae)	KIAA0831	KIAA0831
PLXNA4	plexin A4	TNNI1	troponin I type 1 (skeletal, slow)					C14orf126	chromosome 14 open reading frame 126			PTGFRN	prostaglandin F2 receptor negative regulator					ZNF192	zinc finger protein 192											FAM80A	family with sequence similarity 80, member A					PRNPIP	prion protein interacting protein					UBE2Q1	ubiquitin-conjugating enzyme E2Q family member 1	PCGF5	polycomb group ring finger 5	NXF5	nuclear RNA export factor 5	KIAA1549	KIAA1549
RP11-78J21.1	heterogeneous nuclear ribonucleoprotein A1-like	AAK1	AP2 associated kinase 1					SLU7	SLU7 splicing factor homolog (S. cerevisiae)			TRAM2	translocation associated membrane protein 2					ERC1	ELKS/RAB6-interacting/CAST family member 1											STX12	syntaxin 12					STIP1	stress-induced-phosphoprotein 1 (Hsp70/Hsp90-organizing protein)					TET2	tet oncogene family member 2	FBXL16	F-box and leucine-rich repeat protein 16	DPYSL3	dihydropyrimidinase-like 3	KLF13	Kruppel-like factor 13
HNRNPA1	heterogeneous nuclear ribonucleoprotein A1							FAM123B	family with sequence similarity 123B			SCN2A	sodium channel, voltage-gated, type II, alpha subunit					SFRS7	splicing factor, arginine/serine-rich 7, 35kDa											PPARA	peroxisome proliferator-activated receptor alpha					PLEKHM2	pleckstrin homology domain containing, family M (with RUN domain) member 2					SKIP	skeletal muscle and kidney enriched inositol phosphatase	MAGOHB	mago-nashi homolog B (Drosophila)	PURB	purine-rich element binding protein B	GABPB2	GA binding protein transcription factor, beta subunit 2
AKIRIN1	akirin 1							SEC62	SEC62 homolog (S. cerevisiae)			VAPA	VAMP (vesicle-associated membrane protein)-associated protein A, 33kDa					UBXD7	UBX domain containing 7											KRTAP11-1	keratin associated protein 11-1					SLC25A27	solute carrier family 25, member 27					FBXO41	F-box protein 41	TEX261	testis expressed 261	CDK2	cyclin-dependent kinase 2	ASH2L	ash2 (absent, small, or homeotic)-like (Drosophila)
NMT2	N-myristoyltransferase 2							ANKRD52	ankyrin repeat domain 52			MXD4	MAX dimerization protein 4					AKAP6	A kinase (PRKA) anchor protein 6											KIAA0999	KIAA0999 protein					MAP1A	microtubule-associated protein 1A					TNRC6B	trinucleotide repeat containing 6B	PLCXD3	phosphatidylinositol-specific phospholipase C, X domain containing 3	SLTM	SAFB-like, transcription modulator	KIAA1715	KIAA1715
CBL	Cas-Br-M (murine) ecotropic retroviral transforming sequence							PANK1	pantothenate kinase 1			SCN1A	sodium channel, voltage-gated, type I, alpha subunit					C2orf18	chromosome 2 open reading frame 18											FGF13	fibroblast growth factor 13					MLL3	myeloid/lymphoid or mixed-lineage leukemia 3					RAB5B	RAB5B, member RAS oncogene family	CHD2	chromodomain helicase DNA binding protein 2	SPIN1	spindlin 1	CDH20	cadherin 20, type 2
ADAMTS14	ADAM metallopeptidase with thrombospondin type 1 motif, 14							NKX2-2	NK2 homeobox 2			MAP4	microtubule-associated protein 4					LOC162073	hypothetical protein LOC162073											NOPE	neighbor of Punc E11					RNF44	ring finger protein 44					ZBTB47	zinc finger and BTB domain containing 47	INPP5A	inositol polyphosphate-5-phosphatase, 40kDa	LRIT2	leucine-rich repeat, immunoglobulin-like and transmembrane domains 2	PALM2	paralemmin 2
CELSR2	cadherin, EGF LAG seven-pass G-type receptor 2 (flamingo homolog, Drosophila)							INTS6	integrator complex subunit 6			ELFN2	extracellular leucine-rich repeat and fibronectin type III domain containing 2					OTUB1	OTU domain, ubiquitin aldehyde binding 1											FAM178A	family with sequence similarity 178, member A					BMPR1B	bone morphogenetic protein receptor, type IB					GNG7	guanine nucleotide binding protein (G protein), gamma 7	HNRPDL	heterogeneous nuclear ribonucleoprotein D-like	DOK4	docking protein 4	FAM63B	family with sequence similarity 63, member B
STX11	syntaxin 11							CCDC109A	coiled-coil domain containing 109A			KCNG3	potassium voltage-gated channel, subfamily G, member 3					TRMT5	TRM5 tRNA methyltransferase 5 homolog (S. cerevisiae)											RRM2	ribonucleotide reductase M2 polypeptide					CASQ1	calsequestrin 1 (fast-twitch, skeletal muscle)					TXLNA	taxilin alpha	CREBZF	CREB/ATF bZIP transcription factor	SRrp35	serine-arginine repressor protein (35 kDa)	EPB41L4B	erythrocyte membrane protein band 4.1 like 4B
PCLO	piccolo (presynaptic cytomatrix protein)							OLFML3	olfactomedin-like 3			FAT3	FAT tumor suppressor homolog 3 (Drosophila)					TEF	thyrotrophic embryonic factor											LYRM7	Lyrm7 homolog (mouse)					FAM120C	family with sequence similarity 120C					CADM4	cell adhesion molecule 4	SNRP70	small nuclear ribonucleoprotein 70kDa polypeptide (RNP antigen)	ENPP1	ectonucleotide pyrophosphatase/phosphodiesterase 1	MIER1	mesoderm induction early response 1 homolog (Xenopus laevis)
RAP1A	RAP1A, member of RAS oncogene family							CDC27	cell division cycle 27 homolog (S. cerevisiae)			PTPRO	protein tyrosine phosphatase, receptor type, O					ZNF524	zinc finger protein 524											MESDC1	mesoderm development candidate 1					ZFHX3	zinc finger homeobox 3					MLL2	myeloid/lymphoid or mixed-lineage leukemia 2	PTPRB	protein tyrosine phosphatase, receptor type, B	YOD1	YOD1 OTU deubiquinating enzyme 1 homolog (S. cerevisiae)	C13orf37	chromosome 13 open reading frame 37
IMPAD1	inositol monophosphatase domain containing 1							EIF4B	eukaryotic translation initiation factor 4B			MYO1D	myosin ID					CCND3	cyclin D3											FBXO30	F-box protein 30					CALN1	calneuron 1					ATXN7L3	ataxin 7-like 3	MEF2C	myocyte enhancer factor 2C	KIAA0152	KIAA0152	NRN1	neuritin 1
HCN4	hyperpolarization activated cyclic nucleotide-gated potassium channel 4							FMO2	flavin containing monooxygenase 2 (non-functional)			ONECUT2	one cut homeobox 2					FLJ21865	endo-beta-N-acetylglucosaminidase											SGCD	sarcoglycan, delta (35kDa dystrophin-associated glycoprotein)					MEX3A	mex-3 homolog A (C. elegans)					MEF2D	myocyte enhancer factor 2D	AFF2	AF4/FMR2 family, member 2	STAG3L4	stromal antigen 3-like 4	NPAS2	neuronal PAS domain protein 2
ZNF654	zinc finger protein 654							CEP63	centrosomal protein 63kDa			LIN28	lin-28 homolog (C. elegans)					MGAT4B	mannosyl (alpha-1,3-)-glycoprotein beta-1,4-N-acetylglucosaminyltransferase, isozyme B											CADPS2	Ca2+-dependent activator protein for secretion 2					CELSR2	cadherin, EGF LAG seven-pass G-type receptor 2 (flamingo homolog, Drosophila)					PTGIS	prostaglandin I2 (prostacyclin) synthase	PDGFRA	platelet-derived growth factor receptor, alpha polypeptide	CASC4	cancer susceptibility candidate 4	SGCB	sarcoglycan, beta (43kDa dystrophin-associated glycoprotein)
BCAT1	branched chain aminotransferase 1, cytosolic							C12orf61	chromosome 12 open reading frame 61			PTRF	polymerase I and transcript release factor					OSBP2	oxysterol binding protein 2											RCBTB2	regulator of chromosome condensation (RCC1) and BTB (POZ) domain containing protein 2					SLC11A1	solute carrier family 11 (proton-coupled divalent metal ion transporters), member 1					CPLX3	complexin 3	RPS6KA3	ribosomal protein S6 kinase, 90kDa, polypeptide 3	IGF2BP2	insulin-like growth factor 2 mRNA binding protein 2	RAD21	RAD21 homolog (S. pombe)
LCORL	ligand dependent nuclear receptor corepressor-like							LRCH1	leucine-rich repeats and calponin homology (CH) domain containing 1			GPR26	G protein-coupled receptor 26					PITPNA	phosphatidylinositol transfer protein, alpha											LOC400566	hypothetical gene supported by AK128660					NDFIP1	Nedd4 family interacting protein 1					IGF2BP2	insulin-like growth factor 2 mRNA binding protein 2	ARL4C	ADP-ribosylation factor-like 4C	PIP5K1A	phosphatidylinositol-4-phosphate 5-kinase, type I, alpha	METTL10	methyltransferase like 10
FLJ12993	hypothetical LOC441027							IMPACT	Impact homolog (mouse)			SFTPC	surfactant, pulmonary-associated protein C					HDAC5	histone deacetylase 5											WAPAL	wings apart-like homolog (Drosophila)					LOC387856	similar to expressed sequence AI836003					ALPK3	alpha-kinase 3	UBE2O	ubiquitin-conjugating enzyme E2O	PPP2R3A	protein phosphatase 2 (formerly 2A), regulatory subunit B', alpha	NRP1	neuropilin 1
RELN	reelin							TFAP2B	transcription factor AP-2 beta (activating enhancer binding protein 2 beta)									GPX4	glutathione peroxidase 4 (phospholipid hydroperoxidase)											DNER	delta/notch-like EGF repeat containing					SP7	Sp7 transcription factor					KLF13	Kruppel-like factor 13	FAM172A	family with sequence similarity 172, member A	ARHGEF12	Rho guanine nucleotide exchange factor (GEF) 12	AP3M1	adaptor-related protein complex 3, mu 1 subunit
DCBLD2	discoidin, CUB and LCCL domain containing 2							FAM70A	family with sequence similarity 70, member A									IRF2BP2	interferon regulatory factor 2 binding protein 2											SOX4	SRY (sex determining region Y)-box 4					SREBF2	sterol regulatory element binding transcription factor 2							ZNF706	zinc finger protein 706	MARCKS	myristoylated alanine-rich protein kinase C substrate	ING5	inhibitor of growth family, member 5
MDGA2	MAM domain containing glycosylphosphatidylinositol anchor 2							SNF1LK2	SNF1-like kinase 2									PACSIN1	protein kinase C and casein kinase substrate in neurons 1											MRO	maestro					CENTG1	centaurin, gamma 1							CDC42	cell division cycle 42 (GTP binding protein, 25kDa)	EIF4A1	eukaryotic translation initiation factor 4A, isoform 1	WWC2	WW and C2 domain containing 2
SFRS2IP	splicing factor, arginine/serine-rich 2, interacting protein							CTBP1	C-terminal binding protein 1									SYT7	synaptotagmin VII											NAV1	neuron navigator 1					OTUB1	OTU domain, ubiquitin aldehyde binding 1							CUL3	cullin 3	SMAD4	SMAD family member 4	AIM1	absent in melanoma 1
GAPVD1	GTPase activating protein and VPS9 domains 1							ZFHX3	zinc finger homeobox 3									RGS6	regulator of G-protein signaling 6											ANGPT2	angiopoietin 2					ZFP36	zinc finger protein 36, C3H type, homolog (mouse)							CCNL2	cyclin L2	STRN4	striatin, calmodulin binding protein 4	FOXQ1	forkhead box Q1
SSR1	signal sequence receptor, alpha (translocon-associated protein alpha)							PPP1CB	protein phosphatase 1, catalytic subunit, beta isoform									ZNF276	zinc finger protein 276											LECT2	leukocyte cell-derived chemotaxin 2					POU6F1	POU class 6 homeobox 1							MYH10	myosin, heavy chain 10, non-muscle	NFAT5	nuclear factor of activated T-cells 5, tonicity-responsive	HEY1	hairy/enhancer-of-split related with YRPW motif 1
PLCL2	phospholipase C-like 2							CTNND1	catenin (cadherin-associated protein), delta 1									PCDHGC3	protocadherin gamma subfamily C, 3											RFC3	replication factor C (activator 1) 3, 38kDa					KIF21B	kinesin family member 21B							ANKRD13C	ankyrin repeat domain 13C	CPEB2	cytoplasmic polyadenylation element binding protein 2	BANP	BTG3 associated nuclear protein
ITGA9	integrin, alpha 9							ANKRD50	ankyrin repeat domain 50									PCDHGA12	protocadherin gamma subfamily A, 12											E2F7	E2F transcription factor 7					WASF2	WAS protein family, member 2							DNAJA4	DnaJ (Hsp40) homolog, subfamily A, member 4	PHF19	PHD finger protein 19	GMCL1	germ cell-less homolog 1 (Drosophila)
HOXD10	homeobox D10							ASB8	ankyrin repeat and SOCS box-containing 8									PCDHGB4	protocadherin gamma subfamily B, 4											ELF5	E74-like factor 5 (ets domain transcription factor)					UBL4A	ubiquitin-like 4A							CHD7	chromodomain helicase DNA binding protein 7	GORASP2	golgi reassembly stacking protein 2, 55kDa	IGF2BP3	insulin-like growth factor 2 mRNA binding protein 3
TMEM25	transmembrane protein 25							INSIG2	insulin induced gene 2									PCDHGA1	protocadherin gamma subfamily A, 1											CLIC6	chloride intracellular channel 6					OSBPL7	oxysterol binding protein-like 7							ENTPD1	ectonucleoside triphosphate diphosphohydrolase 1	ZNF385A	zinc finger protein 385A	NKX2-4	NK2 homeobox 4
INTS6	integrator complex subunit 6							TNRC6B	trinucleotide repeat containing 6B									PCDHGA10	protocadherin gamma subfamily A, 10											MMAB	methylmalonic aciduria (cobalamin deficiency) cblB type					CAD	carbamoyl-phosphate synthetase 2, aspartate transcarbamylase, and dihydroorotase							SLC8A2	solute carrier family 8 (sodium-calcium exchanger), member 2	SPTBN1	spectrin, beta, non-erythrocytic 1	ATRX	alpha thalassemia/mental retardation syndrome X-linked (RAD54 homolog, S. cerevisiae)
FAM38B	family with sequence similarity 38, member B							SNX30	sorting nexin family member 30									PCDHGA11	protocadherin gamma subfamily A, 11											SLC11A2	solute carrier family 11 (proton-coupled divalent metal ion transporters), member 2					KIAA0515	KIAA0515							PPP2R2C	protein phosphatase 2 (formerly 2A), regulatory subunit B, gamma isoform	PRKCA	protein kinase C, alpha	C16orf85	chromosome 16 open reading frame 85
PAN3	PAN3 polyA specific ribonuclease subunit homolog (S. cerevisiae)							GBAS	glioblastoma amplified sequence									PCDHGA2	protocadherin gamma subfamily A, 2											MAPRE1	microtubule-associated protein, RP/EB family, member 1					FAM123B	family with sequence similarity 123B							ARGLU1	arginine and glutamate rich 1	ADAMTS1	ADAM metallopeptidase with thrombospondin type 1 motif, 1	ATP13A3	ATPase type 13A3
DBNDD1	dysbindin (dystrobrevin binding protein 1) domain containing 1							KIF19	kinesin family member 19									PCDHGA3	protocadherin gamma subfamily A, 3											CLDN8	claudin 8					MYH10	myosin, heavy chain 10, non-muscle							C20orf72	chromosome 20 open reading frame 72	TARDBP	TAR DNA binding protein	HAS3	hyaluronan synthase 3
CROT	carnitine O-octanoyltransferase							KCNMA1	potassium large conductance calcium-activated channel, subfamily M, alpha member 1									PCDHGA4	protocadherin gamma subfamily A, 4											FAM122B	family with sequence similarity 122B					RAB5B	RAB5B, member RAS oncogene family							EXOC5	exocyst complex component 5	tcag7.1228	hypothetical protein FLJ25778	DLG1	discs, large homolog 1 (Drosophila)
GABRB3	gamma-aminobutyric acid (GABA) A receptor, beta 3							APBB3	amyloid beta (A4) precursor protein-binding, family B, member 3									PCDHGA5	protocadherin gamma subfamily A, 5											C5orf42	chromosome 5 open reading frame 42					ACTN4	actinin, alpha 4							NOX4	NADPH oxidase 4	PRIMA1	proline rich membrane anchor 1	SCOC	short coiled-coil protein
ARHGEF12	Rho guanine nucleotide exchange factor (GEF) 12							PGM2L1	phosphoglucomutase 2-like 1									PCDHGA6	protocadherin gamma subfamily A, 6											ARID3A	AT rich interactive domain 3A (BRIGHT-like)					NELF	nasal embryonic LHRH factor							PRKD1	protein kinase D1	TRPS1	trichorhinophalangeal syndrome I	DCP1A	DCP1 decapping enzyme homolog A (S. cerevisiae)
SNF1LK	SNF1-like kinase							KIAA0831	KIAA0831									PCDHGA7	protocadherin gamma subfamily A, 7											SOX13	SRY (sex determining region Y)-box 13					ADRA1B	adrenergic, alpha-1B-, receptor							PICALM	phosphatidylinositol binding clathrin assembly protein	ICMT	isoprenylcysteine carboxyl methyltransferase	ETV1	ets variant gene 1
HS6ST3	heparan sulfate 6-O-sulfotransferase 3							C21orf91	chromosome 21 open reading frame 91									PCDHGA9	protocadherin gamma subfamily A, 9											MBNL3	muscleblind-like 3 (Drosophila)					ATP11A	ATPase, class VI, type 11A							CACNA1C	calcium channel, voltage-dependent, L type, alpha 1C subunit	KCNIP3	Kv channel interacting protein 3, calsenilin	VPS37B	vacuolar protein sorting 37 homolog B (S. cerevisiae)
PLD5	phospholipase D family, member 5							SLC12A6	solute carrier family 12 (potassium/chloride transporters), member 6									PCDHGB1	protocadherin gamma subfamily B, 1											RP4-692D3.1	hypothetical protein LOC728621					YIPF2	Yip1 domain family, member 2							HNRNPUL2	heterogeneous nuclear ribonucleoprotein U-like 2	C6orf145	chromosome 6 open reading frame 145	TPD52L2	tumor protein D52-like 2
SLC24A4	solute carrier family 24 (sodium/potassium/calcium exchanger), member 4							DCDC2	doublecortin domain containing 2									PCDHGB2	protocadherin gamma subfamily B, 2											ATP8A1	ATPase, aminophospholipid transporter (APLT), class I, type 8A, member 1					BAZ2A	bromodomain adjacent to zinc finger domain, 2A							ALS2CR4	amyotrophic lateral sclerosis 2 (juvenile) chromosome region, candidate 4	SCRT1	scratch homolog 1, zinc finger protein (Drosophila)	PPP2R2C	protein phosphatase 2 (formerly 2A), regulatory subunit B, gamma isoform
MITF	microphthalmia-associated transcription factor							COLEC12	collectin sub-family member 12									PCDHGB3	protocadherin gamma subfamily B, 3											SFXN2	sideroflexin 2					FKBP8	FK506 binding protein 8, 38kDa							MUM1L1	melanoma associated antigen (mutated) 1-like 1	KCNJ10	potassium inwardly-rectifying channel, subfamily J, member 10	BCAT1	branched chain aminotransferase 1, cytosolic
C7orf60	chromosome 7 open reading frame 60							ETV1	ets variant gene 1									PCDHGB5	protocadherin gamma subfamily B, 5											SEMA3A	sema domain, immunoglobulin domain (Ig), short basic domain, secreted, (semaphorin) 3A					LINGO1	leucine rich repeat and Ig domain containing 1							GRLF1	glucocorticoid receptor DNA binding factor 1	RBM8A	RNA binding motif protein 8A	ANKH	ankylosis, progressive homolog (mouse)
ATP2B4	ATPase, Ca++ transporting, plasma membrane 4							LPIN2	lipin 2									PCDHGB6	protocadherin gamma subfamily B, 6											MACROD2	MACRO domain containing 2					TAOK2	TAO kinase 2							XIAP	X-linked inhibitor of apoptosis	SLC31A1	solute carrier family 31 (copper transporters), member 1	LOXL3	lysyl oxidase-like 3
FBXO30	F-box protein 30							MAP3K7IP3	mitogen-activated protein kinase kinase kinase 7 interacting protein 3									PCDHGB7	protocadherin gamma subfamily B, 7											FAM120C	family with sequence similarity 120C					WDTC1	WD and tetratricopeptide repeats 1							SAMD12	sterile alpha motif domain containing 12	RP13-102H20.1	hypothetical protein FLJ30058	ARMC1	armadillo repeat containing 1
MYO1D	myosin ID							ZCCHC16	zinc finger, CCHC domain containing 16									PCDHGC4	protocadherin gamma subfamily C, 4											HSPA13	heat shock protein 70kDa family, member 13					AUP1	ancient ubiquitous protein 1							DLX6	distal-less homeobox 6	POLR3D	polymerase (RNA) III (DNA directed) polypeptide D, 44kDa	CALN1	calneuron 1
C12orf34	chromosome 12 open reading frame 34							UBXD3	UBX domain containing 3									PCDHGC5	protocadherin gamma subfamily C, 5											LIPG	lipase, endothelial					IGF2	insulin-like growth factor 2 (somatomedin A)							MLLT6	myeloid/lymphoid or mixed-lineage leukemia (trithorax homolog, Drosophila); translocated to, 6	SUV39H1	suppressor of variegation 3-9 homolog 1 (Drosophila)	KIAA1012	KIAA1012
YEATS4	YEATS domain containing 4							SFRS12	splicing factor, arginine/serine-rich 12									LEPRE1	leucine proline-enriched proteoglycan (leprecan) 1											PPARGC1A	peroxisome proliferator-activated receptor gamma, coactivator 1 alpha					AJAP1	adherens junctions associated protein 1							ADAMTS18	ADAM metallopeptidase with thrombospondin type 1 motif, 18	TRIB2	tribbles homolog 2 (Drosophila)	SMARCD2	SWI/SNF related, matrix associated, actin dependent regulator of chromatin, subfamily d, member 2
TMEM163	transmembrane protein 163							MUC21	mucin 21, cell surface associated									PCDHGA8	protocadherin gamma subfamily A, 8											TRHDE	thyrotropin-releasing hormone degrading enzyme					SEMA4G	sema domain, immunoglobulin domain (Ig), transmembrane domain (TM) and short cytoplasmic domain, (semaphorin) 4G							MEIS2	Meis homeobox 2	CELSR2	cadherin, EGF LAG seven-pass G-type receptor 2 (flamingo homolog, Drosophila)	WNK1	WNK lysine deficient protein kinase 1
FRYL	FRY-like							C10orf26	chromosome 10 open reading frame 26									RP5-1022P6.2	hypothetical protein KIAA1434											FLJ45537	FLJ45537 protein					ZNF385A	zinc finger protein 385A							SH2B3	SH2B adaptor protein 3	CCDC6	coiled-coil domain containing 6	NPC1	Niemann-Pick disease, type C1
CEP68	centrosomal protein 68kDa							NEO1	neogenin homolog 1 (chicken)									MMP28	matrix metallopeptidase 28											SEC16B	SEC16 homolog B (S. cerevisiae)					ATXN7L3	ataxin 7-like 3							ABCA13	ATP-binding cassette, sub-family A (ABC1), member 13	MYLK3	myosin light chain kinase 3	LOC162073	hypothetical protein LOC162073
BRCC3	BRCA1/BRCA2-containing complex, subunit 3							C1QTNF2	C1q and tumor necrosis factor related protein 2									RANBP10	RAN binding protein 10											COPA	coatomer protein complex, subunit alpha					MKL1	megakaryoblastic leukemia (translocation) 1							SFRS7	splicing factor, arginine/serine-rich 7, 35kDa	PHLDB1	pleckstrin homology-like domain, family B, member 1	USP44	ubiquitin specific peptidase 44
USP34	ubiquitin specific peptidase 34							LPHN2	latrophilin 2									MIPOL1	mirror-image polydactyly 1											GRM1	glutamate receptor, metabotropic 1					ODZ4	odz, odd Oz/ten-m homolog 4 (Drosophila)							SP8	Sp8 transcription factor	CYGB	cytoglobin	ARMCX2	armadillo repeat containing, X-linked 2
KIAA1522	KIAA1522							LPIN1	lipin 1									MAFG	v-maf musculoaponeurotic fibrosarcoma oncogene homolog G (avian)											CLIC4	chloride intracellular channel 4					OTP	orthopedia homeobox							TMEM159	transmembrane protein 159	C16orf48	chromosome 16 open reading frame 48	NAP1L5	nucleosome assembly protein 1-like 5
MED12L	mediator complex subunit 12-like							ANKRD22	ankyrin repeat domain 22									EIF2C1	eukaryotic translation initiation factor 2C, 1											PIK3IP1	phosphoinositide-3-kinase interacting protein 1					ECEL1	endothelin converting enzyme-like 1							FUSIP1	FUS interacting protein (serine/arginine-rich) 1	MYLK2	myosin light chain kinase 2	EREG	epiregulin
STAM2	signal transducing adaptor molecule (SH3 domain and ITAM motif) 2							ANKH	ankylosis, progressive homolog (mouse)									FGF9	fibroblast growth factor 9 (glia-activating factor)											ITGA2	integrin, alpha 2 (CD49B, alpha 2 subunit of VLA-2 receptor)					ST7L	suppression of tumorigenicity 7 like							SORBS1	sorbin and SH3 domain containing 1	POLI	polymerase (DNA directed) iota	GLIS3	GLIS family zinc finger 3
PTPN11	protein tyrosine phosphatase, non-receptor type 11 (Noonan syndrome 1)							NTRK2	neurotrophic tyrosine kinase, receptor, type 2									SPTBN4	spectrin, beta, non-erythrocytic 4											RNF144B	ring finger 144B					KCNIP2	Kv channel interacting protein 2							CDK6	cyclin-dependent kinase 6	YBX2	Y box binding protein 2	LIMCH1	LIM and calponin homology domains 1
SHMT1	serine hydroxymethyltransferase 1 (soluble)							HNRNPU	heterogeneous nuclear ribonucleoprotein U (scaffold attachment factor A)									VPS25	vacuolar protein sorting 25 homolog (S. cerevisiae)											DPY19L1	dpy-19-like 1 (C. elegans)					AQP1	aquaporin 1 (Colton blood group)							PRRG4	proline rich Gla (G-carboxyglutamic acid) 4 (transmembrane)	SYNGR1	synaptogyrin 1	QSOX2	quiescin Q6 sulfhydryl oxidase 2
ISLR2	immunoglobulin superfamily containing leucine-rich repeat 2							C8orf79	chromosome 8 open reading frame 79									BCL2L1	BCL2-like 1											MFAP3	microfibrillar-associated protein 3					DNAJC18	DnaJ (Hsp40) homolog, subfamily C, member 18							INSC	inscuteable homolog (Drosophila)	FAM135B	family with sequence similarity 135, member B	NDRG3	NDRG family member 3
SHANK2	SH3 and multiple ankyrin repeat domains 2							PDZD2	PDZ domain containing 2									ACVR1B	activin A receptor, type IB											FBXW11	F-box and WD repeat domain containing 11					TSC22D3	TSC22 domain family, member 3							KIAA0101	KIAA0101	TTC9	tetratricopeptide repeat domain 9	KIF26A	kinesin family member 26A
NAT8L	N-acetyltransferase 8-like							MIER3	mesoderm induction early response 1, family member 3									C9orf69	chromosome 9 open reading frame 69											SPATA8	spermatogenesis associated 8					TLN2	talin 2							FAM122A	family with sequence similarity 122A	GNRH1	gonadotropin-releasing hormone 1 (luteinizing-releasing hormone)	EIF2B1	eukaryotic translation initiation factor 2B, subunit 1 alpha, 26kDa
IRF9	interferon regulatory factor 9							CREB3L2	cAMP responsive element binding protein 3-like 2									SPINLW1	serine peptidase inhibitor-like, with Kunitz and WAP domains 1 (eppin)											SCMH1	sex comb on midleg homolog 1 (Drosophila)					KIAA0664	KIAA0664							SORCS3	sortilin-related VPS10 domain containing receptor 3	AK2	adenylate kinase 2	PHF1	PHD finger protein 1
RAPGEFL1	Rap guanine nucleotide exchange factor (GEF)-like 1							CYB5B	cytochrome b5 type B (outer mitochondrial membrane)									ANKRD52	ankyrin repeat domain 52											CDCA7L	cell division cycle associated 7-like					MAN2A2	mannosidase, alpha, class 2A, member 2							NUFIP2	nuclear fragile X mental retardation protein interacting protein 2	TAF8	TAF8 RNA polymerase II, TATA box binding protein (TBP)-associated factor, 43kDa	PAIP2B	poly(A) binding protein interacting protein 2B
SRGAP2	SLIT-ROBO Rho GTPase activating protein 2							FAM13A1	family with sequence similarity 13, member A1									WDR45L	WDR45-like											CRTAM	cytotoxic and regulatory T cell molecule					C2CD2L	C2CD2-like							BCL11B	B-cell CLL/lymphoma 11B (zinc finger protein)			PAK7	p21 protein (Cdc42/Rac)-activated kinase 7
NUFIP2	nuclear fragile X mental retardation protein interacting protein 2							CLIC6	chloride intracellular channel 6									HPCAL4	hippocalcin like 4											MYCL1	v-myc myelocytomatosis viral oncogene homolog 1, lung carcinoma derived (avian)					PSD	pleckstrin and Sec7 domain containing							RAPGEF2	Rap guanine nucleotide exchange factor (GEF) 2			LAMP1	lysosomal-associated membrane protein 1
CPNE8	copine VIII							LOC196993	hypothetical protein LOC196993									DACH1	dachshund homolog 1 (Drosophila)											WDR16	WD repeat domain 16					TRAF4	TNF receptor-associated factor 4							SNAP91	synaptosomal-associated protein, 91kDa homolog (mouse)			IFT57	intraflagellar transport 57 homolog (Chlamydomonas)
GALNT13	UDP-N-acetyl-alpha-D-galactosamine:polypeptide N-acetylgalactosaminyltransferase 13 (GalNAc-T13)							MRO	maestro									CNBP	CCHC-type zinc finger, nucleic acid binding protein											GK5	glycerol kinase 5 (putative)					LPPR2	lipid phosphate phosphatase-related protein type 2							KIAA1576	KIAA1576 protein			ALG9	asparagine-linked glycosylation 9 homolog (S. cerevisiae, alpha- 1,2-mannosyltransferase)
FAM63B	family with sequence similarity 63, member B							SNIP	SNAP25-interacting protein									PHF21A	PHD finger protein 21A											DSCC1	defective in sister chromatid cohesion 1 homolog (S. cerevisiae)					FZD4	frizzled homolog 4 (Drosophila)							ACACA	acetyl-Coenzyme A carboxylase alpha			PSCD1	pleckstrin homology, Sec7 and coiled-coil domains 1(cytohesin 1)
RABEP1	rabaptin, RAB GTPase binding effector protein 1							NFIX	nuclear factor I/X (CCAAT-binding transcription factor)									C14orf101	chromosome 14 open reading frame 101											GAL3ST4	galactose-3-O-sulfotransferase 4					AKT1S1	AKT1 substrate 1 (proline-rich)							FRK	fyn-related kinase			VGLL3	vestigial like 3 (Drosophila)
LMO3	LIM domain only 3 (rhombotin-like 2)							SHB	Src homology 2 domain containing adaptor protein B									ADRA2A	adrenergic, alpha-2A-, receptor											2010-09-06	septin 6					NAT9	N-acetyltransferase 9							MYST3	MYST histone acetyltransferase (monocytic leukemia) 3			DCBLD2	discoidin, CUB and LCCL domain containing 2
KIAA1024	KIAA1024							C18orf34	chromosome 18 open reading frame 34									GRIN2A	glutamate receptor, ionotropic, N-methyl D-aspartate 2A											AKT3	v-akt murine thymoma viral oncogene homolog 3 (protein kinase B, gamma)					VPS37D	vacuolar protein sorting 37 homolog D (S. cerevisiae)							RP11-78J21.1	heterogeneous nuclear ribonucleoprotein A1-like			CYBRD1	cytochrome b reductase 1
RGS20	regulator of G-protein signaling 20							ELAVL3	ELAV (embryonic lethal, abnormal vision, Drosophila)-like 3 (Hu antigen C)									PTOV1	prostate tumor overexpressed gene 1											TMED7	transmembrane emp24 protein transport domain containing 7					AK2	adenylate kinase 2							NFIA	nuclear factor I/A			ANKRD13A	ankyrin repeat domain 13A
RIMBP2	RIMS binding protein 2							VPS54	vacuolar protein sorting 54 homolog (S. cerevisiae)									PTRF	polymerase I and transcript release factor											IHPK1	inositol hexaphosphate kinase 1					HPCAL4	hippocalcin like 4							FOXP1	forkhead box P1			ZNF664	zinc finger protein 664
SERTAD2	SERTA domain containing 2							TNIP1	TNFAIP3 interacting protein 1									FBXW2	F-box and WD repeat domain containing 2											TXNDC4	thioredoxin domain containing 4 (endoplasmic reticulum)					PBX2	pre-B-cell leukemia homeobox 2							CPNE4	copine IV			HOXA10	homeobox A10
BAI3	brain-specific angiogenesis inhibitor 3							ANK1	ankyrin 1, erythrocytic									TBC1D24	TBC1 domain family, member 24											FAM126B	family with sequence similarity 126, member B					GNAI2	guanine nucleotide binding protein (G protein), alpha inhibiting activity polypeptide 2							HDAC4	histone deacetylase 4			CUX1	cut-like homeobox 1
ROBO1	roundabout, axon guidance receptor, homolog 1 (Drosophila)							C10orf104	chromosome 10 open reading frame 104									PRELP	proline/arginine-rich end leucine-rich repeat protein											CNN3	calponin 3, acidic					ITGA3	integrin, alpha 3 (antigen CD49C, alpha 3 subunit of VLA-3 receptor)							CXorf23	chromosome X open reading frame 23			CALD1	caldesmon 1
USP32	ubiquitin specific peptidase 32							C7orf54	chromosome 7 open reading frame 54									MEGF9	multiple EGF-like-domains 9											CAMK1D	calcium/calmodulin-dependent protein kinase ID					BCL3	B-cell CLL/lymphoma 3							MAK	male germ cell-associated kinase			PCSK6	proprotein convertase subtilisin/kexin type 6
GAB2	GRB2-associated binding protein 2							DBN1	drebrin 1									SMCR7L	Smith-Magenis syndrome chromosome region, candidate 7-like											ARL6IP2	ADP-ribosylation factor-like 6 interacting protein 2					MTCH2	mitochondrial carrier homolog 2 (C. elegans)							SSR3	signal sequence receptor, gamma (translocon-associated protein gamma)			MEX3B	mex-3 homolog B (C. elegans)
NDRG4	NDRG family member 4							POLS	polymerase (DNA directed) sigma									VAX1	ventral anterior homeobox 1											C5orf23	chromosome 5 open reading frame 23					COPS7B	COP9 constitutive photomorphogenic homolog subunit 7B (Arabidopsis)	Sites in UTR						ATXN1	ataxin 1			TSHZ3	teashirt zinc finger homeobox 3
MTMR12	myotubularin related protein 12							BICD2	bicaudal D homolog 2 (Drosophila)									KCNC1	potassium voltage-gated channel, Shaw-related subfamily, member 1											CLASP2	cytoplasmic linker associated protein 2					KLC2	kinesin light chain 2	Sites in UTR						USP7	ubiquitin specific peptidase 7 (herpes virus-associated)			HNRNPF	heterogeneous nuclear ribonucleoprotein F
ABCA1	ATP-binding cassette, sub-family A (ABC1), member 1							BAIAP2	BAI1-associated protein 2									ZNRF1	zinc and ring finger 1											TEAD1	TEA domain family member 1 (SV40 transcriptional enhancer factor)					MGAT3	mannosyl (beta-1,4-)-glycoprotein beta-1,4-N-acetylglucosaminyltransferase	Sites in UTR						SMARCD1	SWI/SNF related, matrix associated, actin dependent regulator of chromatin, subfamily d, member 1			CBL	Cas-Br-M (murine) ecotropic retroviral transforming sequence
ZEB2	zinc finger E-box binding homeobox 2							FGF12	fibroblast growth factor 12																					NPTX1	neuronal pentraxin I					PCYT1B	phosphate cytidylyltransferase 1, choline, beta	Sites in UTR						NXN	nucleoredoxin			ZBTB33	zinc finger and BTB domain containing 33
HRBL	HIV-1 Rev binding protein-like							THTPA	thiamine triphosphatase																					ATAD5	ATPase family, AAA domain containing 5					PTPRD	protein tyrosine phosphatase, receptor type, D	Sites in UTR						CBL	Cas-Br-M (murine) ecotropic retroviral transforming sequence			CPEB3	cytoplasmic polyadenylation element binding protein 3
UBE2H	ubiquitin-conjugating enzyme E2H (UBC8 homolog, yeast)							ADAMTS4	ADAM metallopeptidase with thrombospondin type 1 motif, 4																					PRKAA1	protein kinase, AMP-activated, alpha 1 catalytic subunit					GPR107	G protein-coupled receptor 107	Sites in UTR						SHANK2	SH3 and multiple ankyrin repeat domains 2			SFTPH	surfactant associated protein H
STXBP1	syntaxin binding protein 1							HOXC13	homeobox C13																					KIAA0494	KIAA0494					AP1G1	adaptor-related protein complex 1, gamma 1 subunit	Sites in UTR						SFRS1	splicing factor, arginine/serine-rich 1 (splicing factor 2, alternate splicing factor)			C16orf58	chromosome 16 open reading frame 58
SNX4	sorting nexin 4							TGFBR1	transforming growth factor, beta receptor I (activin A receptor type II-like kinase, 53kDa)																					BCL11A	B-cell CLL/lymphoma 11A (zinc finger protein)					SHPK	sedoheptulokinase	Sites in UTR						TOMM20	translocase of outer mitochondrial membrane 20 homolog (yeast)			MGC24039	hypothetical protein MGC24039
TACC1	transforming, acidic coiled-coil containing protein 1							MTMR3	myotubularin related protein 3																					ELK1	ELK1, member of ETS oncogene family					ABL2	v-abl Abelson murine leukemia viral oncogene homolog 2 (arg, Abelson-related gene)	Sites in UTR						MAFB	v-maf musculoaponeurotic fibrosarcoma oncogene homolog B (avian)			PRPS1	phosphoribosyl pyrophosphate synthetase 1
MGC13057	hypothetical protein MGC13057							LTA	lymphotoxin alpha (TNF superfamily, member 1)																					PDZRN4	PDZ domain containing RING finger 4					GAN	giant axonal neuropathy (gigaxonin)	Sites in UTR						ODZ1	odz, odd Oz/ten-m homolog 1(Drosophila)			ZNF3	zinc finger protein 3
NRXN1	neurexin 1																													RUNX1T1	runt-related transcription factor 1; translocated to, 1 (cyclin D-related)					TMCC1	transmembrane and coiled-coil domain family 1	Sites in UTR						SPCS2	signal peptidase complex subunit 2 homolog (S. cerevisiae)			C5orf41	chromosome 5 open reading frame 41
B3GAT1	beta-1,3-glucuronyltransferase 1 (glucuronosyltransferase P)																													IPO9	importin 9					VDAC1	voltage-dependent anion channel 1	Sites in UTR						KIAA0528	KIAA0528			YAF2	YY1 associated factor 2
FAM175B	family with sequence similarity 175, member B																													ZIC1	Zic family member 1 (odd-paired homolog, Drosophila)					ELAVL1	ELAV (embryonic lethal, abnormal vision, Drosophila)-like 1 (Hu antigen R)	Sites in UTR						CS	citrate synthase			DCUN1D4	DCN1, defective in cullin neddylation 1, domain containing 4 (S. cerevisiae)
SYT13	synaptotagmin XIII																													UBE2H	ubiquitin-conjugating enzyme E2H (UBC8 homolog, yeast)					PCDH19	protocadherin 19	Sites in UTR						RRP15	ribosomal RNA processing 15 homolog (S. cerevisiae)			ALKBH5	alkB, alkylation repair homolog 5 (E. coli)
MYT1L	myelin transcription factor 1-like																													PPP1CB	protein phosphatase 1, catalytic subunit, beta isoform					FBXO11	F-box protein 11	Sites in UTR						SCGB2A2	secretoglobin, family 2A, member 2			GLT8D3	glycosyltransferase 8 domain containing 3
MED17	mediator complex subunit 17																													DDX5	DEAD (Asp-Glu-Ala-Asp) box polypeptide 5					FAM175B	family with sequence similarity 175, member B	Sites in UTR						SLC2A4RG	SLC2A4 regulator			TSC22D4	TSC22 domain family, member 4
RHOBTB1	Rho-related BTB domain containing 1																													FBXL7	F-box and leucine-rich repeat protein 7					NIPBL	Nipped-B homolog (Drosophila)	Sites in UTR						DHDDS	dehydrodolichyl diphosphate synthase			PTGER3	prostaglandin E receptor 3 (subtype EP3)
RBM47	RNA binding motif protein 47																													PIP5K3	phosphatidylinositol-3-phosphate/phosphatidylinositol 5-kinase, type III					DCX	doublecortex; lissencephaly, X-linked (doublecortin)	Sites in UTR						SOX4	SRY (sex determining region Y)-box 4			SASH1	SAM and SH3 domain containing 1
DYRK1A	dual-specificity tyrosine-(Y)-phosphorylation regulated kinase 1A																													ZSWIM5	zinc finger, SWIM-type containing 5					TMEM135	transmembrane protein 135	Sites in UTR						ASH1L	ash1 (absent, small, or homeotic)-like (Drosophila)			PIGK	phosphatidylinositol glycan anchor biosynthesis, class K
SLC6A17	solute carrier family 6, member 17																													NFIB	nuclear factor I/B					ZNF512B	zinc finger protein 512B	Sites in UTR						CNOT6L	CCR4-NOT transcription complex, subunit 6-like			TNRC6B	trinucleotide repeat containing 6B
TNC	tenascin C (hexabrachion)																													KIAA0556	KIAA0556					MOCS1	molybdenum cofactor synthesis 1	Sites in UTR						SMARCAD1	SWI/SNF-related, matrix-associated actin-dependent regulator of chromatin, subfamily a, containing DEAD/H box 1			HIAT1	hippocampus abundant transcript 1
HS3ST2	heparan sulfate (glucosamine) 3-O-sulfotransferase 2																													DCP2	DCP2 decapping enzyme homolog (S. cerevisiae)					CUEDC2	CUE domain containing 2	Sites in UTR						EIF2S2	eukaryotic translation initiation factor 2, subunit 2 beta, 38kDa			ARF1	ADP-ribosylation factor 1
CRIM1	cysteine rich transmembrane BMP regulator 1 (chordin-like)																													MAPKAP1	mitogen-activated protein kinase associated protein 1					FAM19A2	family with sequence similarity 19 (chemokine (C-C motif)-like), member A2	Sites in UTR						HNRNPA1	heterogeneous nuclear ribonucleoprotein A1			SLC6A8	solute carrier family 6 (neurotransmitter transporter, creatine), member 8
CALN1	calneuron 1																													BASP1	brain abundant, membrane attached signal protein 1					2010-09-03	septin 3	Sites in UTR						PCDHAC1	protocadherin alpha subfamily C, 1			ENPEP	glutamyl aminopeptidase (aminopeptidase A)
SPSB1	splA/ryanodine receptor domain and SOCS box containing 1																													EDA	ectodysplasin A					C18orf1	chromosome 18 open reading frame 1	Sites in UTR						PCDHAC2	protocadherin alpha subfamily C, 2			SFRS12IP1	SFRS12-interacting protein 1
RARA	retinoic acid receptor, alpha																													USP31	ubiquitin specific peptidase 31					SMAD2	SMAD family member 2	Sites in UTR						PCDHA1	protocadherin alpha 1			EYA4	eyes absent homolog 4 (Drosophila)
IKZF1	IKAROS family zinc finger 1 (Ikaros)																													LZTS1	leucine zipper, putative tumor suppressor 1					SP1	Sp1 transcription factor	Sites in UTR						PCDHA10	protocadherin alpha 10			PYGO2	pygopus homolog 2 (Drosophila)
FAM3C	family with sequence similarity 3, member C																													ANGPTL2	angiopoietin-like 2					GGT7	gamma-glutamyltransferase 7	Sites in UTR						PCDHA11	protocadherin alpha 11			MIER3	mesoderm induction early response 1, family member 3
DNAL1	dynein, axonemal, light chain 1																													GLT8D1	glycosyltransferase 8 domain containing 1					C14orf83	chromosome 14 open reading frame 83	Sites in UTR						PCDHA12	protocadherin alpha 12			DLGAP4	discs, large (Drosophila) homolog-associated protein 4
PSEN1	presenilin 1 (Alzheimer disease 3)																													MAP3K8	mitogen-activated protein kinase kinase kinase 8					ZFX	zinc finger protein, X-linked	Sites in UTR						PCDHA13	protocadherin alpha 13			CMPK1	cytidine monophosphate (UMP-CMP) kinase 1, cytosolic
PTPRK	protein tyrosine phosphatase, receptor type, K																													SYN1	synapsin I					RNF44	ring finger protein 44	Sites in UTR						PCDHA2	protocadherin alpha 2			SNTB2	syntrophin, beta 2 (dystrophin-associated protein A1, 59kDa, basic component 2)
HOXB3	homeobox B3																													LRP6	low density lipoprotein receptor-related protein 6					KCTD20	potassium channel tetramerisation domain containing 20	Sites in UTR						PCDHA3	protocadherin alpha 3			KIAA2022	KIAA2022
HS3ST3B1	heparan sulfate (glucosamine) 3-O-sulfotransferase 3B1																													FLJ45032	similar to F40B5.2b					RUNX1	runt-related transcription factor 1 (acute myeloid leukemia 1; aml1 oncogene)	Sites in UTR						PCDHA4	protocadherin alpha 4			B4GALT6	UDP-Gal:betaGlcNAc beta 1,4- galactosyltransferase, polypeptide 6
L3MBTL4	l(3)mbt-like 4 (Drosophila)																													PALM2-AKAP2	PALM2-AKAP2					BASP1	brain abundant, membrane attached signal protein 1	Sites in UTR						PCDHA5	protocadherin alpha 5			VIM	vimentin
SGCD	sarcoglycan, delta (35kDa dystrophin-associated glycoprotein)																													AKAP2	A kinase (PRKA) anchor protein 2					RBM9	RNA binding motif protein 9	Sites in UTR						PCDHA6	protocadherin alpha 6			MRPS25	mitochondrial ribosomal protein S25
DBN1	drebrin 1																													CLLU1	chronic lymphocytic leukemia up-regulated 1					PHC1	polyhomeotic homolog 1 (Drosophila)	Sites in UTR						PCDHA7	protocadherin alpha 7			CLCN5	chloride channel 5 (nephrolithiasis 2, X-linked, Dent disease)
BMI1	BMI1 polycomb ring finger oncogene																													MAP3K2	mitogen-activated protein kinase kinase kinase 2					RIMBP2	RIMS binding protein 2	Sites in UTR						PCDHA8	protocadherin alpha 8			FLRT3	fibronectin leucine rich transmembrane protein 3
HIF1AN	hypoxia-inducible factor 1, alpha subunit inhibitor																													KCND2	potassium voltage-gated channel, Shal-related subfamily, member 2					ZC3H7B	zinc finger CCCH-type containing 7B	Sites in UTR						ZNF654	zinc finger protein 654			BLCAP	bladder cancer associated protein
CDCA7L	cell division cycle associated 7-like																													ELMOD1	ELMO/CED-12 domain containing 1					FAM123B	family with sequence similarity 123B	Sites in UTR						BTBD3	BTB (POZ) domain containing 3			SYNGR2	synaptogyrin 2
SIX3	SIX homeobox 3																													CLPTM1L	CLPTM1-like					TET3	tet oncogene family member 3	Sites in UTR						HMGA2	high mobility group AT-hook 2			CKAP5	cytoskeleton associated protein 5
CCDC88A	coiled-coil domain containing 88A																													AXIN1	axin 1					CUL5	cullin 5	Sites in UTR						RIMS2	regulating synaptic membrane exocytosis 2			CCNL2	cyclin L2
HCFC1	host cell factor C1 (VP16-accessory protein)																													C9orf19	chromosome 9 open reading frame 19					FOXO1	forkhead box O1	Sites in UTR						QTRTD1	queuine tRNA-ribosyltransferase domain containing 1			SUPT16H	suppressor of Ty 16 homolog (S. cerevisiae)
PEX5L	peroxisomal biogenesis factor 5-like																													MYST2	MYST histone acetyltransferase 2					CHIC1	cysteine-rich hydrophobic domain 1	Sites in UTR						RNF139	ring finger protein 139			ST7	suppression of tumorigenicity 7
WASF3	WAS protein family, member 3																													CNR1	cannabinoid receptor 1 (brain)					PSME3	proteasome (prosome, macropain) activator subunit 3 (PA28 gamma; Ki)	Sites in UTR						SLC12A5	solute carrier family 12, (potassium-chloride transporter) member 5			TMCC1	transmembrane and coiled-coil domain family 1
KIAA1161	KIAA1161																													PHB2	prohibitin 2					YOD1	YOD1 OTU deubiquinating enzyme 1 homolog (S. cerevisiae)	Sites in UTR						PPT1	palmitoyl-protein thioesterase 1 (ceroid-lipofuscinosis, neuronal 1, infantile)			RNF150	ring finger protein 150
GRM1	glutamate receptor, metabotropic 1																													GALNT17	polypeptide N-acetylgalactosaminyltransferase 17					PRKCG	protein kinase C, gamma	Sites in UTR						ZC3H12A	zinc finger CCCH-type containing 12A			TIAM1	T-cell lymphoma invasion and metastasis 1
SH3GL1	SH3-domain GRB2-like 1																													NELL2	NEL-like 2 (chicken)					RAN	RAN, member RAS oncogene family	Sites in UTR						SPTY2D1	SPT2, Suppressor of Ty, domain containing 1 (S. cerevisiae)			RHOBTB3	Rho-related BTB domain containing 3
CC2D1A	coiled-coil and C2 domain containing 1A																													PTAR1	protein prenyltransferase alpha subunit repeat containing 1					GJC1	gap junction protein, gamma 1, 45kDa	Sites in UTR						CAMK2D	calcium/calmodulin-dependent protein kinase (CaM kinase) II delta			RAP1A	RAP1A, member of RAS oncogene family
CSMD3	CUB and Sushi multiple domains 3																													HIC2	hypermethylated in cancer 2					ZC3H4	zinc finger CCCH-type containing 4	Sites in UTR						MAGED1	melanoma antigen family D, 1			SOX4	SRY (sex determining region Y)-box 4
TOX3	TOX high mobility group box family member 3																													MYO5A	myosin VA (heavy chain 12, myoxin)					SRF	serum response factor (c-fos serum response element-binding transcription factor)	Sites in UTR						CPLX1	complexin 1			TMEM2	transmembrane protein 2
DLG2	discs, large homolog 2, chapsyn-110 (Drosophila)																													HIAT1	hippocampus abundant transcript 1					KLF3	Kruppel-like factor 3 (basic)	Sites in UTR						C5orf41	chromosome 5 open reading frame 41			SLC6A6	solute carrier family 6 (neurotransmitter transporter, taurine), member 6
TRHDE	thyrotropin-releasing hormone degrading enzyme																													ETV6	ets variant gene 6 (TEL oncogene)					GON4L	gon-4-like (C. elegans)	Sites in UTR						ZNF655	zinc finger protein 655			FAM155A	family with sequence similarity 155, member A
NUDT10	nudix (nucleoside diphosphate linked moiety X)-type motif 10																													KIF11	kinesin family member 11					ZNF532	zinc finger protein 532	Sites in UTR						BTG2	BTG family, member 2			ZIC3	Zic family member 3 (odd-paired homolog, Drosophila)
FBXO41	F-box protein 41																													HLCS	holocarboxylase synthetase (biotin-(proprionyl-Coenzyme A-carboxylase (ATP-hydrolysing)) ligase)					SCAMP5	secretory carrier membrane protein 5	Sites in UTR						METTL8	methyltransferase like 8			KLHL36	kelch-like 36 (Drosophila)
ROBO2	roundabout, axon guidance receptor, homolog 2 (Drosophila)																													BAHCC1	BAH domain and coiled-coil containing 1					LMX1A	LIM homeobox transcription factor 1, alpha	Sites in UTR						GRB10	growth factor receptor-bound protein 10			SLITRK3	SLIT and NTRK-like family, member 3
POLD3	polymerase (DNA-directed), delta 3, accessory subunit																													GABRB3	gamma-aminobutyric acid (GABA) A receptor, beta 3					ZHX3	zinc fingers and homeoboxes 3	Sites in UTR						RNF44	ring finger protein 44			PPM1H	protein phosphatase 1H (PP2C domain containing)
TFAP2E	transcription factor AP-2 epsilon (activating enhancer binding protein 2 epsilon)																													SLC39A2	solute carrier family 39 (zinc transporter), member 2					HMGB3	high-mobility group box 3	Sites in UTR						DDX3X	DEAD (Asp-Glu-Ala-Asp) box polypeptide 3, X-linked			C14orf147	chromosome 14 open reading frame 147
RRP1B	ribosomal RNA processing 1 homolog B (S. cerevisiae)																													ASB8	ankyrin repeat and SOCS box-containing 8					SLC23A2	solute carrier family 23 (nucleobase transporters), member 2	Sites in UTR						PDCD4	programmed cell death 4 (neoplastic transformation inhibitor)			PCSK7	proprotein convertase subtilisin/kexin type 7
RNF219	ring finger protein 219																													PCTP	phosphatidylcholine transfer protein					ARF3	ADP-ribosylation factor 3	Sites in UTR						LARP5	La ribonucleoprotein domain family, member 5			YIPF5	Yip1 domain family, member 5
KALRN	kalirin, RhoGEF kinase																													ZNF641	zinc finger protein 641					FREQ	frequenin homolog (Drosophila)	Sites in UTR						CAPRIN1	cell cycle associated protein 1			GRASP	GRP1 (general receptor for phosphoinositides 1)-associated scaffold protein
PRKG1	protein kinase, cGMP-dependent, type I																													ACVR2B	activin A receptor, type IIB					FUBP1	far upstream element (FUSE) binding protein 1	Sites in UTR						ARHGAP5	Rho GTPase activating protein 5			MMP16	matrix metallopeptidase 16 (membrane-inserted)
HIVEP1	human immunodeficiency virus type I enhancer binding protein 1																													SLITRK2	SLIT and NTRK-like family, member 2					GRIK3	glutamate receptor, ionotropic, kainate 3	Sites in UTR						CAMK2A	calcium/calmodulin-dependent protein kinase (CaM kinase) II alpha			CRKL	v-crk sarcoma virus CT10 oncogene homolog (avian)-like
DUSP5	dual specificity phosphatase 5																													UBE2Q1	ubiquitin-conjugating enzyme E2Q family member 1					GNB1	guanine nucleotide binding protein (G protein), beta polypeptide 1	Sites in UTR						TPRG1	tumor protein p63 regulated 1			GTPBP2	GTP binding protein 2
GNG3	guanine nucleotide binding protein (G protein), gamma 3																													PHF15	PHD finger protein 15					CNOT2	CCR4-NOT transcription complex, subunit 2	Sites in UTR						MECP2	methyl CpG binding protein 2 (Rett syndrome)			WTAP	Wilms tumor 1 associated protein
SHC4	SHC (Src homology 2 domain containing) family, member 4																													C1orf83	chromosome 1 open reading frame 83					FYTTD1	forty-two-three domain containing 1	Sites in UTR						OCIAD1	OCIA domain containing 1			RPL15	ribosomal protein L15
PPME1	protein phosphatase methylesterase 1																													FNBP4	formin binding protein 4					KLF6	Kruppel-like factor 6	Sites in UTR						YTHDF2	YTH domain family, member 2			TOMM70A	translocase of outer mitochondrial membrane 70 homolog A (S. cerevisiae)
FYCO1	FYVE and coiled-coil domain containing 1																													PDLIM5	PDZ and LIM domain 5					FBXW2	F-box and WD repeat domain containing 2	Sites in UTR						KCNIP4	Kv channel interacting protein 4			RHOBTB1	Rho-related BTB domain containing 1
DAAM1	dishevelled associated activator of morphogenesis 1																													KPNA3	karyopherin alpha 3 (importin alpha 4)					GDF6	growth differentiation factor 6	Sites in UTR						CALM2	calmodulin 2 (phosphorylase kinase, delta)			RAD23B	RAD23 homolog B (S. cerevisiae)
SOCS6	suppressor of cytokine signaling 6																													MAPK1	mitogen-activated protein kinase 1					SMARCD1	SWI/SNF related, matrix associated, actin dependent regulator of chromatin, subfamily d, member 1	Sites in UTR						PLXNA1	plexin A1			UBE2D3	ubiquitin-conjugating enzyme E2D 3 (UBC4/5 homolog, yeast)
LMNB1	lamin B1																													BTRC	beta-transducin repeat containing					SOX1	SRY (sex determining region Y)-box 1	Sites in UTR						FREQ	frequenin homolog (Drosophila)			DBN1	drebrin 1
KCTD9	potassium channel tetramerisation domain containing 9																													MRE11A	MRE11 meiotic recombination 11 homolog A (S. cerevisiae)					MAFB	v-maf musculoaponeurotic fibrosarcoma oncogene homolog B (avian)	Sites in UTR						GCNT2	glucosaminyl (N-acetyl) transferase 2, I-branching enzyme (I blood group)			KIAA0247	KIAA0247
PPP2R2A	protein phosphatase 2 (formerly 2A), regulatory subunit B, alpha isoform																													FAM114A1	family with sequence similarity 114, member A1					ANKRD13C	ankyrin repeat domain 13C	Sites in UTR						CBX4	chromobox homolog 4 (Pc class homolog, Drosophila)			EFS	embryonal Fyn-associated substrate
TBC1D8B	TBC1 domain family, member 8B (with GRAM domain)																													GPHN	gephyrin					EYA4	eyes absent homolog 4 (Drosophila)	Sites in UTR						CDRT1	CMT1A duplicated region transcript 1			GPR107	G protein-coupled receptor 107
DCX	doublecortex; lissencephaly, X-linked (doublecortin)																													PSME3	proteasome (prosome, macropain) activator subunit 3 (PA28 gamma; Ki)					ESRRG	estrogen-related receptor gamma	Sites in UTR						C20orf77	chromosome 20 open reading frame 77			RAPGEFL1	Rap guanine nucleotide exchange factor (GEF)-like 1
RNF220	ring finger protein 220																													HELZ	helicase with zinc finger					TRPS1	trichorhinophalangeal syndrome I	Sites in UTR						IGF2BP1	insulin-like growth factor 2 mRNA binding protein 1			YWHAZ	tyrosine 3-monooxygenase/tryptophan 5-monooxygenase activation protein, zeta polypeptide
GPR85	G protein-coupled receptor 85																													OTUD3	OTU domain containing 3					NUPL1	nucleoporin like 1	Sites in UTR						FLJ14154	hypothetical protein FLJ14154			ANKFY1	ankyrin repeat and FYVE domain containing 1
FAM13A1	family with sequence similarity 13, member A1																													MGA	MAX gene associated					PELI2	pellino homolog 2 (Drosophila)	Sites in UTR						SIRPA	signal-regulatory protein alpha			SUPT7L	suppressor of Ty 7 (S. cerevisiae)-like
LPPR4	plasticity related gene 1																													TRIM45	tripartite motif-containing 45					ACVR2B	activin A receptor, type IIB	Sites in UTR						CALN1	calneuron 1			BMI1	BMI1 polycomb ring finger oncogene
PIK3R1	phosphoinositide-3-kinase, regulatory subunit 1 (alpha)																													RASSF2	Ras association (RalGDS/AF-6) domain family member 2					NFAT5	nuclear factor of activated T-cells 5, tonicity-responsive	Sites in UTR						HMMR	hyaluronan-mediated motility receptor (RHAMM)			ATF7IP2	activating transcription factor 7 interacting protein 2
ZBTB34	zinc finger and BTB domain containing 34																													PAP2D	phosphatidic acid phosphatase type 2					CLCN4	chloride channel 4	Sites in UTR										VPS39	vacuolar protein sorting 39 homolog (S. cerevisiae)
C20orf20	chromosome 20 open reading frame 20																													RIC8B	resistance to inhibitors of cholinesterase 8 homolog B (C. elegans)					SHANK2	SH3 and multiple ankyrin repeat domains 2	Sites in UTR										SIN3A	SIN3 homolog A, transcription regulator (yeast)
MYO16	myosin XVI																													EXOC2	exocyst complex component 2					PAFAH1B1	platelet-activating factor acetylhydrolase, isoform Ib, alpha subunit 45kDa	Sites in UTR										IGF1R	insulin-like growth factor 1 receptor
SLCO5A1	solute carrier organic anion transporter family, member 5A1																													DSCAML1	Down syndrome cell adhesion molecule like 1					C20orf160	chromosome 20 open reading frame 160											RXRA	retinoid X receptor, alpha
C9orf58	chromosome 9 open reading frame 58																													FOXO3	forkhead box O3					SOX11	SRY (sex determining region Y)-box 11											MAPK1IP1L	mitogen-activated protein kinase 1 interacting protein 1-like
ZFX	zinc finger protein, X-linked																													WIZ	widely interspaced zinc finger motifs					RNF169	ring finger protein 169											AK2	adenylate kinase 2
IPO8	importin 8																													MTX3	metaxin 3																	BMP3	bone morphogenetic protein 3
C14orf129	chromosome 14 open reading frame 129																													CREB5	cAMP responsive element binding protein 5																	SATB2	SATB homeobox 2
GPAM	glycerol-3-phosphate acyltransferase, mitochondrial																													PKNOX2	PBX/knotted 1 homeobox 2																	NELF	nasal embryonic LHRH factor
CADM2	cell adhesion molecule 2																													PITPNB	phosphatidylinositol transfer protein, beta																	CNOT7	CCR4-NOT transcription complex, subunit 7
ST8SIA4	ST8 alpha-N-acetyl-neuraminide alpha-2,8-sialyltransferase 4																													ZNF644	zinc finger protein 644																	FAM49B	family with sequence similarity 49, member B
MAGI2	membrane associated guanylate kinase, WW and PDZ domain containing 2																													UBTF	upstream binding transcription factor, RNA polymerase I																	PARD6B	par-6 partitioning defective 6 homolog beta (C. elegans)
BIVM	basic, immunoglobulin-like variable motif containing																													HNRNPU	heterogeneous nuclear ribonucleoprotein U (scaffold attachment factor A)																	MAPK8IP3	mitogen-activated protein kinase 8 interacting protein 3
MCC	mutated in colorectal cancers																													FAM123B	family with sequence similarity 123B																	MAT2A	methionine adenosyltransferase II, alpha
POLH	polymerase (DNA directed), eta																													C19orf47	chromosome 19 open reading frame 47																	MAPK1	mitogen-activated protein kinase 1
SRP72	signal recognition particle 72kDa																													UBA6	ubiquitin-like modifier activating enzyme 6																	DTNA	dystrobrevin, alpha
ATXN2L	ataxin 2-like																													COL4A4	collagen, type IV, alpha 4																	MEGF11	multiple EGF-like-domains 11
SMCHD1	structural maintenance of chromosomes flexible hinge domain containing 1																													PDE4B	phosphodiesterase 4B, cAMP-specific (phosphodiesterase E4 dunce homolog, Drosophila)																	PCSK1	proprotein convertase subtilisin/kexin type 1
BIRC6	baculoviral IAP repeat-containing 6 (apollon)																													EREG	epiregulin																	SERBP1	SERPINE1 mRNA binding protein 1
RET	ret proto-oncogene																													LARP1	La ribonucleoprotein domain family, member 1																	GPR177	G protein-coupled receptor 177
GRIA2	glutamate receptor, ionotropic, AMPA 2																													P15RS	cyclin-dependent kinase 2B-inhibitor-related protein																	SHMT1	serine hydroxymethyltransferase 1 (soluble)
FUT9	fucosyltransferase 9 (alpha (1,3) fucosyltransferase)																													SLC22A3	solute carrier family 22 (extraneuronal monoamine transporter), member 3																	TCEA1	transcription elongation factor A (SII), 1
ZBTB11	zinc finger and BTB domain containing 11																													KIAA0152	KIAA0152																	SEPN1	selenoprotein N, 1
PTPN9	protein tyrosine phosphatase, non-receptor type 9																													HSDL1	hydroxysteroid dehydrogenase like 1																	XPO1	exportin 1 (CRM1 homolog, yeast)
OTUD7B	OTU domain containing 7B																													GOLGB1	golgin B1, golgi integral membrane protein																	CDH2	cadherin 2, type 1, N-cadherin (neuronal)
SLC35F1	solute carrier family 35, member F1																													SOST	sclerosteosis																	PLK3	polo-like kinase 3 (Drosophila)
TMEM132B	transmembrane protein 132B																													TSPAN2	tetraspanin 2																	DMD	dystrophin (muscular dystrophy, Duchenne and Becker types)
C10orf141	chromosome 10 open reading frame 141																													KIAA1244	KIAA1244																	PTPRB	protein tyrosine phosphatase, receptor type, B
ST8SIA5	ST8 alpha-N-acetyl-neuraminide alpha-2,8-sialyltransferase 5																													ABI2	abl interactor 2																	2010-09-06	septin 6
GNB1	guanine nucleotide binding protein (G protein), beta polypeptide 1																													GRIA1	glutamate receptor, ionotropic, AMPA 1																	EMILIN2	elastin microfibril interfacer 2
FZD4	frizzled homolog 4 (Drosophila)																													CTNND1	catenin (cadherin-associated protein), delta 1																	SMG7	Smg-7 homolog, nonsense mediated mRNA decay factor (C. elegans)
SNX13	sorting nexin 13																													HRC	histidine rich calcium binding protein																	ZNF652	zinc finger protein 652
PHF20	PHD finger protein 20																													TMED10	transmembrane emp24-like trafficking protein 10 (yeast)																	KIAA0368	KIAA0368
ZRANB1	zinc finger, RAN-binding domain containing 1																													FUSIP1	FUS interacting protein (serine/arginine-rich) 1																	ARL4A	ADP-ribosylation factor-like 4A
ZNF518B	zinc finger protein 518B																													AGTR2	angiotensin II receptor, type 2																	ARPC5	actin related protein 2/3 complex, subunit 5, 16kDa
tcag7.1228	hypothetical protein FLJ25778																													DEPDC1	DEP domain containing 1																	GSPT2	G1 to S phase transition 2
CLCN5	chloride channel 5 (nephrolithiasis 2, X-linked, Dent disease)																													ZMYM4	zinc finger, MYM-type 4																	KIAA1826	KIAA1826
SCAMP5	secretory carrier membrane protein 5																													CEP63	centrosomal protein 63kDa																	ONECUT1	one cut homeobox 1
CTNND2	catenin (cadherin-associated protein), delta 2 (neural plakophilin-related arm-repeat protein)																													ODZ4	odz, odd Oz/ten-m homolog 4 (Drosophila)																	YES1	v-yes-1 Yamaguchi sarcoma viral oncogene homolog 1
ARAF	v-raf murine sarcoma 3611 viral oncogene homolog																													HEY2	hairy/enhancer-of-split related with YRPW motif 2																	C5orf43	chromosome 5 open reading frame 43
ERRFI1	ERBB receptor feedback inhibitor 1																													IGF1R	insulin-like growth factor 1 receptor																	STK24	serine/threonine kinase 24 (STE20 homolog, yeast)
SERBP1	SERPINE1 mRNA binding protein 1																													PRICKLE2	prickle homolog 2 (Drosophila)																	OSBPL3	oxysterol binding protein-like 3
PTP4A1	protein tyrosine phosphatase type IVA, member 1																													ZNF532	zinc finger protein 532																	C11orf9	chromosome 11 open reading frame 9
SCN2B	sodium channel, voltage-gated, type II, beta																													SEMA3D	sema domain, immunoglobulin domain (Ig), short basic domain, secreted, (semaphorin) 3D																	PRKG1	protein kinase, cGMP-dependent, type I
CHST8	carbohydrate (N-acetylgalactosamine 4-0) sulfotransferase 8																													CD276	CD276 molecule																	TRAF7	TNF receptor-associated factor 7
MBNL1	muscleblind-like (Drosophila)																													ZC3H7B	zinc finger CCCH-type containing 7B																	NONO	non-POU domain containing, octamer-binding
FOXP2	forkhead box P2																													AFAP1	actin filament associated protein 1																	MAP1LC3B	microtubule-associated protein 1 light chain 3 beta
KIF21B	kinesin family member 21B																													HDAC4	histone deacetylase 4																	HIPK3	homeodomain interacting protein kinase 3
DOLPP1	dolichyl pyrophosphate phosphatase 1																													KCNC1	potassium voltage-gated channel, Shaw-related subfamily, member 1																	PDE4D	phosphodiesterase 4D, cAMP-specific (phosphodiesterase E3 dunce homolog, Drosophila)
DCUN1D1	DCN1, defective in cullin neddylation 1, domain containing 1 (S. cerevisiae)																													TSHZ3	teashirt zinc finger homeobox 3																	NR3C1	nuclear receptor subfamily 3, group C, member 1 (glucocorticoid receptor)
SLC12A2	solute carrier family 12 (sodium/potassium/chloride transporters), member 2																													PPFIBP1	PTPRF interacting protein, binding protein 1 (liprin beta 1)																	SOBP	sine oculis binding protein homolog (Drosophila)
BRPF3	bromodomain and PHD finger containing, 3																													CDC2L6	cell division cycle 2-like 6 (CDK8-like)																	HNRNPC	heterogeneous nuclear ribonucleoprotein C (C1/C2)
ADIPOR2	adiponectin receptor 2																													ADM	adrenomedullin																	DLG2	discs, large homolog 2, chapsyn-110 (Drosophila)
FOXN3	forkhead box N3																													TCERG1L	transcription elongation regulator 1-like																	HSPA4	heat shock 70kDa protein 4
SEC61A1	Sec61 alpha 1 subunit (S. cerevisiae)																													MKLN1	muskelin 1, intracellular mediator containing kelch motifs																	GSPT1	G1 to S phase transition 1
C16orf70	chromosome 16 open reading frame 70																													ESR1	estrogen receptor 1																	SPTLC2	serine palmitoyltransferase, long chain base subunit 2
ADARB1	adenosine deaminase, RNA-specific, B1 (RED1 homolog rat)																													YBX1	Y box binding protein 1																	TNKS2	tankyrase, TRF1-interacting ankyrin-related ADP-ribose polymerase 2
PDGFRA	platelet-derived growth factor receptor, alpha polypeptide																													CLCN4	chloride channel 4																	TWF1	twinfilin, actin-binding protein, homolog 1 (Drosophila)
EPHA8	EPH receptor A8																													IRF4	interferon regulatory factor 4																	TFCP2L1	transcription factor CP2-like 1
FRAS1	Fraser syndrome 1																													ZNF362	zinc finger protein 362																	ATL3	atlastin 3
PI4K2A	phosphatidylinositol 4-kinase type 2 alpha																													SENP5	SUMO1/sentrin specific peptidase 5																	PPP1R16B	protein phosphatase 1, regulatory (inhibitor) subunit 16B
MARCKS	myristoylated alanine-rich protein kinase C substrate																													RAB5C	RAB5C, member RAS oncogene family																	SS18	synovial sarcoma translocation, chromosome 18
KIAA1553	KIAA1553																													FAM84A	family with sequence similarity 84, member A																	HS6ST1	heparan sulfate 6-O-sulfotransferase 1
ZDHHC8	zinc finger, DHHC-type containing 8																													ETAA1	Ewing tumor-associated antigen 1																	DIXDC1	DIX domain containing 1
ZDHHC23	zinc finger, DHHC-type containing 23																													DNAJC5B	DnaJ (Hsp40) homolog, subfamily C, member 5 beta																	ARHGAP26	Rho GTPase activating protein 26
RNF41	ring finger protein 41																													SRGAP3	SLIT-ROBO Rho GTPase activating protein 3																	DICER1	dicer 1, ribonuclease type III
ZMIZ2	zinc finger, MIZ-type containing 2																													THOC2	THO complex 2																	ANKRD52	ankyrin repeat domain 52
CRKL	v-crk sarcoma virus CT10 oncogene homolog (avian)-like																													NR4A2	nuclear receptor subfamily 4, group A, member 2																	OLA1	Obg-like ATPase 1
SV2A	synaptic vesicle glycoprotein 2A																													KIAA0664	KIAA0664																	TNKS	tankyrase, TRF1-interacting ankyrin-related ADP-ribose polymerase
SNF1LK2	SNF1-like kinase 2																													ZC3H18	zinc finger CCCH-type containing 18																	CD99L2	CD99 molecule-like 2
KIAA1166	KIAA1166																													PSCD3	pleckstrin homology, Sec7 and coiled-coil domains 3																	GNS	glucosamine (N-acetyl)-6-sulfatase (Sanfilippo disease IIID)
INHBB	inhibin, beta B																													LMBR1	limb region 1 homolog (mouse)																	FXR1	fragile X mental retardation, autosomal homolog 1
VASH2	vasohibin 2																													IKZF2	IKAROS family zinc finger 2 (Helios)																	HS2ST1	heparan sulfate 2-O-sulfotransferase 1
TANC2	tetratricopeptide repeat, ankyrin repeat and coiled-coil containing 2																													HS3ST4	heparan sulfate (glucosamine) 3-O-sulfotransferase 4																	FLJ20309	hypothetical protein FLJ20309
EXOC5	exocyst complex component 5																													SMAD4	SMAD family member 4																	ATP6V1A	ATPase, H+ transporting, lysosomal 70kDa, V1 subunit A
GPR137C	G protein-coupled receptor 137C																													SLC23A2	solute carrier family 23 (nucleobase transporters), member 2																	LRRC4	leucine rich repeat containing 4
GRIK3	glutamate receptor, ionotropic, kainate 3																													PHF2	PHD finger protein 2																	ELOVL6	ELOVL family member 6, elongation of long chain fatty acids (FEN1/Elo2, SUR4/Elo3-like, yeast)
PALM2	paralemmin 2																													KRT34	keratin 34																	ADIPOR1	adiponectin receptor 1
PBX2	pre-B-cell leukemia homeobox 2																													CLIC5	chloride intracellular channel 5																	PURB	purine-rich element binding protein B
C20orf194	chromosome 20 open reading frame 194																													SENP7	SUMO1/sentrin specific peptidase 7																	CSNK1E	casein kinase 1, epsilon
RFFL	ring finger and FYVE-like domain containing 1																													CTBP2	C-terminal binding protein 2																	TLK2	tousled-like kinase 2
RCOR1	REST corepressor 1																													CACNA2D2	calcium channel, voltage-dependent, alpha 2/delta subunit 2																	GHITM	growth hormone inducible transmembrane protein
TBC1D12	TBC1 domain family, member 12																													LBA1	lupus brain antigen 1																	XKRX	XK, Kell blood group complex subunit-related, X-linked
PPP1R12C	protein phosphatase 1, regulatory (inhibitor) subunit 12C																													FAM177B	family with sequence similarity 177, member B																	RELL1	RELT-like 1
DDX6	DEAD (Asp-Glu-Ala-Asp) box polypeptide 6																													TMEM143	transmembrane protein 143																	CNOT4	CCR4-NOT transcription complex, subunit 4
KLF12	Kruppel-like factor 12																													SYNGAP1	synaptic Ras GTPase activating protein 1 homolog (rat)																	CLASP1	cytoplasmic linker associated protein 1
SOCS7	suppressor of cytokine signaling 7																													NECAP1	NECAP endocytosis associated 1																	CPEB1	cytoplasmic polyadenylation element binding protein 1
LRRC7	leucine rich repeat containing 7																													ACTR5	ARP5 actin-related protein 5 homolog (yeast)																	ACVR2B	activin A receptor, type IIB
CNOT6L	CCR4-NOT transcription complex, subunit 6-like																													NLGN3	neuroligin 3																	NEGR1	neuronal growth regulator 1
NPAS2	neuronal PAS domain protein 2																													NPL	N-acetylneuraminate pyruvate lyase (dihydrodipicolinate synthase)																	SALL2	sal-like 2 (Drosophila)
RASSF2	Ras association (RalGDS/AF-6) domain family member 2																													JARID1C	jumonji, AT rich interactive domain 1C																	RBBP6	retinoblastoma binding protein 6
GDE1	glycerophosphodiester phosphodiesterase 1																													COPS2	COP9 constitutive photomorphogenic homolog subunit 2 (Arabidopsis)																	IGF1	insulin-like growth factor 1 (somatomedin C)
BICD1	bicaudal D homolog 1 (Drosophila)																													WHSC2	Wolf-Hirschhorn syndrome candidate 2																	MOBKL2B	MOB1, Mps One Binder kinase activator-like 2B (yeast)
SMPD3	sphingomyelin phosphodiesterase 3, neutral membrane (neutral sphingomyelinase II)																													XPO6	exportin 6																	SPCS2	signal peptidase complex subunit 2 homolog (S. cerevisiae)
SOX11	SRY (sex determining region Y)-box 11																													EPHA7	EPH receptor A7																	ARL5A	ADP-ribosylation factor-like 5A
ZNF609	zinc finger protein 609																													C6orf115	chromosome 6 open reading frame 115																	KRIT1	KRIT1, ankyrin repeat containing
FLRT3	fibronectin leucine rich transmembrane protein 3																													VANGL1	vang-like 1 (van gogh, Drosophila)																	NRL	neural retina leucine zipper
KIAA1267	KIAA1267																													TBC1D22B	TBC1 domain family, member 22B																	TPD52	tumor protein D52
SNX18	sorting nexin 18																													SLC1A1	solute carrier family 1 (neuronal/epithelial high affinity glutamate transporter, system Xag), member 1																	SORCS1	sortilin-related VPS10 domain containing receptor 1
NAV3	neuron navigator 3																													SF3A3	splicing factor 3a, subunit 3, 60kDa																	NIPA1	non imprinted in Prader-Willi/Angelman syndrome 1
ATP8B4	ATPase, class I, type 8B, member 4																													LATS2	LATS, large tumor suppressor, homolog 2 (Drosophila)																	PRKAR1A	protein kinase, cAMP-dependent, regulatory, type I, alpha (tissue specific extinguisher 1)
JDP2	Jun dimerization protein 2																													PPP1R2	protein phosphatase 1, regulatory (inhibitor) subunit 2																	KCMF1	potassium channel modulatory factor 1
ARPP-19	cyclic AMP phosphoprotein, 19 kD																													PISD	phosphatidylserine decarboxylase																	CLASP2	cytoplasmic linker associated protein 2
ANKRD52	ankyrin repeat domain 52																													KIAA2018	KIAA2018																	POLE4	polymerase (DNA-directed), epsilon 4 (p12 subunit)
SEC14L1	SEC14-like 1 (S. cerevisiae)																													TOMM20	translocase of outer mitochondrial membrane 20 homolog (yeast)																	TBL1XR1	transducin (beta)-like 1 X-linked receptor 1
DIRAS2	DIRAS family, GTP-binding RAS-like 2																													ZNF609	zinc finger protein 609																	C9orf100	chromosome 9 open reading frame 100
SLC35B2	solute carrier family 35, member B2																													MFAP3L	microfibrillar-associated protein 3-like																	S1PR1	sphingosine-1-phosphate receptor 1
PDSS2	prenyl (decaprenyl) diphosphate synthase, subunit 2																													ZNF207	zinc finger protein 207																	WARS2	tryptophanyl tRNA synthetase 2, mitochondrial
RCC1	regulator of chromosome condensation 1																													ATXN10	ataxin 10																	LRRTM1	leucine rich repeat transmembrane neuronal 1
SNHG3-RCC1	SNHG3-RCC1																													TRPM6	transient receptor potential cation channel, subfamily M, member 6																	LRP6	low density lipoprotein receptor-related protein 6
CUL3	cullin 3																													MS4A15	membrane-spanning 4-domains, subfamily A, member 15																	FIGN	fidgetin
KIT	v-kit Hardy-Zuckerman 4 feline sarcoma viral oncogene homolog																													MED1	mediator complex subunit 1																	AKAP2	A kinase (PRKA) anchor protein 2
GUCY1A2	guanylate cyclase 1, soluble, alpha 2																													DNAJB5	DnaJ (Hsp40) homolog, subfamily B, member 5																	PALM2-AKAP2	PALM2-AKAP2
OXSR1	oxidative-stress responsive 1																													LONRF2	LON peptidase N-terminal domain and ring finger 2																	LOC153364	similar to metallo-beta-lactamase superfamily protein
RYBP	RING1 and YY1 binding protein																													MITF	microphthalmia-associated transcription factor																	YWHAQ	tyrosine 3-monooxygenase/tryptophan 5-monooxygenase activation protein, theta polypeptide
GPD1L	glycerol-3-phosphate dehydrogenase 1-like																													WSB2	WD repeat and SOCS box-containing 2																	PTPLAD1	protein tyrosine phosphatase-like A domain containing 1
C6orf134	chromosome 6 open reading frame 134																													DIXDC1	DIX domain containing 1																	FKBP5	FK506 binding protein 5
PHF17	PHD finger protein 17																													BSN	bassoon (presynaptic cytomatrix protein)																	ROD1	ROD1 regulator of differentiation 1 (S. pombe)
AFF4	AF4/FMR2 family, member 4																													CCDC88A	coiled-coil domain containing 88A																	BHLHB5	basic helix-loop-helix domain containing, class B, 5
WDR48	WD repeat domain 48																													TRIM14	tripartite motif-containing 14																	CCND2	cyclin D2
GRIA4	glutamate receptor, ionotrophic, AMPA 4																													MANEA	mannosidase, endo-alpha																	CNOT6L	CCR4-NOT transcription complex, subunit 6-like
CACNA1I	calcium channel, voltage-dependent, T type, alpha 1I subunit																													GSPT2	G1 to S phase transition 2																	ULK1	unc-51-like kinase 1 (C. elegans)
hCG_18385	similar to cAMP-regulated phosphoprotein																													RASSF5	Ras association (RalGDS/AF-6) domain family member 5																	YWHAE	tyrosine 3-monooxygenase/tryptophan 5-monooxygenase activation protein, epsilon polypeptide
C18orf1	chromosome 18 open reading frame 1																													C16orf5	chromosome 16 open reading frame 5																	PPP1R3F	protein phosphatase 1, regulatory (inhibitor) subunit 3F
RAP1GDS1	RAP1, GTP-GDP dissociation stimulator 1																													SEPN1	selenoprotein N, 1																	TLL2	tolloid-like 2
BAHD1	bromo adjacent homology domain containing 1																													CDC42BPA	CDC42 binding protein kinase alpha (DMPK-like)																	UNC5A	unc-5 homolog A (C. elegans)
BTBD14B	BTB (POZ) domain containing 14B																													ATG2B	ATG2 autophagy related 2 homolog B (S. cerevisiae)																	CTSB	cathepsin B
UNC13A	unc-13 homolog A (C. elegans)																													LAMC2	laminin, gamma 2																	CENTB2	centaurin, beta 2
KCNIP3	Kv channel interacting protein 3, calsenilin																													FBN1	fibrillin 1																	F13A1	coagulation factor XIII, A1 polypeptide
CLK3	CDC-like kinase 3																													DCP1A	DCP1 decapping enzyme homolog A (S. cerevisiae)																	SENP5	SUMO1/sentrin specific peptidase 5
SLC5A3	solute carrier family 5 (inositol transporters), member 3																													SH3PXD2A	SH3 and PX domains 2A																	UNKL	unkempt homolog (Drosophila)-like
ELMO1	engulfment and cell motility 1																													SPTBN1	spectrin, beta, non-erythrocytic 1																	SORBS2	sorbin and SH3 domain containing 2
PLXNA1	plexin A1																													CMTM6	CKLF-like MARVEL transmembrane domain containing 6																	FAM120C	family with sequence similarity 120C
PPP2R4	protein phosphatase 2A activator, regulatory subunit 4																													RCE1	RCE1 homolog, prenyl protein peptidase (S. cerevisiae)																	CHGA	chromogranin A (parathyroid secretory protein 1)
C14orf43	chromosome 14 open reading frame 43																													ENAH	enabled homolog (Drosophila)																	NAT11	N-acetyltransferase 11
SPRED2	sprouty-related, EVH1 domain containing 2																													DSEL	dermatan sulfate epimerase-like																	MYH10	myosin, heavy chain 10, non-muscle
KLF3	Kruppel-like factor 3 (basic)																													MEIS2	Meis homeobox 2																	PHOX2B	paired-like homeobox 2b
THTPA	thiamine triphosphatase																													AHR	aryl hydrocarbon receptor																	PDCD4	programmed cell death 4 (neoplastic transformation inhibitor)
PURB	purine-rich element binding protein B																													ZIC3	Zic family member 3 (odd-paired homolog, Drosophila)																	VKORC1L1	vitamin K epoxide reductase complex, subunit 1-like 1
DPP6	dipeptidyl-peptidase 6																													FBLN7	fibulin 7																	CECR6	cat eye syndrome chromosome region, candidate 6
PPP2R2C	protein phosphatase 2 (formerly 2A), regulatory subunit B, gamma isoform																													PDE11A	phosphodiesterase 11A																	CEP68	centrosomal protein 68kDa
RNF38	ring finger protein 38																													ANKRD13A	ankyrin repeat domain 13A																	ZFHX4	zinc finger homeobox 4
SP1	Sp1 transcription factor																													KLF13	Kruppel-like factor 13																	SYT11	synaptotagmin XI
LASP1	LIM and SH3 protein 1																													PRCD	progressive rod-cone degeneration																	SH2D4B	SH2 domain containing 4B
HIC2	hypermethylated in cancer 2																													FRAT2	frequently rearranged in advanced T-cell lymphomas 2																	ABCC5	ATP-binding cassette, sub-family C (CFTR/MRP), member 5
HCN3	hyperpolarization activated cyclic nucleotide-gated potassium channel 3																													CDC25A	cell division cycle 25 homolog A (S. pombe)																	SPRED2	sprouty-related, EVH1 domain containing 2
ZC3H12C	zinc finger CCCH-type containing 12C																													PDE4D	phosphodiesterase 4D, cAMP-specific (phosphodiesterase E3 dunce homolog, Drosophila)																	SLC35C1	solute carrier family 35, member C1
HLF	hepatic leukemia factor																													PUNC	putative neuronal cell adhesion molecule																	DIP2C	DIP2 disco-interacting protein 2 homolog C (Drosophila)
GABRB2	gamma-aminobutyric acid (GABA) A receptor, beta 2																													TPD52L2	tumor protein D52-like 2																	JARID1A	jumonji, AT rich interactive domain 1A
FAM125B	family with sequence similarity 125, member B																													LRRC4	leucine rich repeat containing 4																	TBX2	T-box 2
ZMIZ1	zinc finger, MIZ-type containing 1																													CCDC117	coiled-coil domain containing 117																	RTKN2	rhotekin 2
FRMPD4	FERM and PDZ domain containing 4																													SLCO3A1	solute carrier organic anion transporter family, member 3A1																	STK4	serine/threonine kinase 4
ZBTB41	zinc finger and BTB domain containing 41																													FBXO18	F-box protein, helicase, 18																	SDHC	succinate dehydrogenase complex, subunit C, integral membrane protein, 15kDa
KIAA0649	KIAA0649																													MAPK8IP3	mitogen-activated protein kinase 8 interacting protein 3																	SUZ12	suppressor of zeste 12 homolog (Drosophila)
GAN	giant axonal neuropathy (gigaxonin)																													GPR26	G protein-coupled receptor 26																	CHFR	checkpoint with forkhead and ring finger domains
GPR153	G protein-coupled receptor 153																													NRP1	neuropilin 1																	PDE12	phosphodiesterase 12
CENPB	centromere protein B, 80kDa																													SMEK1	SMEK homolog 1, suppressor of mek1 (Dictyostelium)																	USP14	ubiquitin specific peptidase 14 (tRNA-guanine transglycosylase)
KPNA1	karyopherin alpha 1 (importin alpha 5)																													PHF21B	PHD finger protein 21B																	GOLGA3	golgi autoantigen, golgin subfamily a, 3
NOVA1	neuro-oncological ventral antigen 1																													YPEL2	yippee-like 2 (Drosophila)																	C14orf43	chromosome 14 open reading frame 43
ARL5B	ADP-ribosylation factor-like 5B																													UNC5D	unc-5 homolog D (C. elegans)																	DNAJA2	DnaJ (Hsp40) homolog, subfamily A, member 2
DCP2	DCP2 decapping enzyme homolog (S. cerevisiae)																													RNF44	ring finger protein 44																	LIN7C	lin-7 homolog C (C. elegans)
LPHN1	latrophilin 1																													PRKG1	protein kinase, cGMP-dependent, type I																	FAM80A	family with sequence similarity 80, member A
ACCN2	amiloride-sensitive cation channel 2, neuronal																																															ETS2	v-ets erythroblastosis virus E26 oncogene homolog 2 (avian)
USP31	ubiquitin specific peptidase 31																																															GMFB	glia maturation factor, beta
ABL2	v-abl Abelson murine leukemia viral oncogene homolog 2 (arg, Abelson-related gene)																																															CDKN1C	cyclin-dependent kinase inhibitor 1C (p57, Kip2)
MBD6	methyl-CpG binding domain protein 6																																															E2F1	E2F transcription factor 1
RIMS4	regulating synaptic membrane exocytosis 4																																															IKZF2	IKAROS family zinc finger 2 (Helios)
SLC39A1	solute carrier family 39 (zinc transporter), member 1																																															C18orf1	chromosome 18 open reading frame 1
C7orf20	chromosome 7 open reading frame 20																																															SIAH2	seven in absentia homolog 2 (Drosophila)
MAPK8IP3	mitogen-activated protein kinase 8 interacting protein 3																																															WDR1	WD repeat domain 1
TSPAN9	tetraspanin 9																																															MYT1L	myelin transcription factor 1-like
CASKIN1	CASK interacting protein 1																																															PER2	period homolog 2 (Drosophila)
SFMBT2	Scm-like with four mbt domains 2																																															PGR	progesterone receptor
KIAA1045	KIAA1045																																															SMARCC1	SWI/SNF related, matrix associated, actin dependent regulator of chromatin, subfamily c, member 1
MAFG	v-maf musculoaponeurotic fibrosarcoma oncogene homolog G (avian)																																															PPIL2	peptidylprolyl isomerase (cyclophilin)-like 2
FAM123B	family with sequence similarity 123B																																															TGFBR2	transforming growth factor, beta receptor II (70/80kDa)
GDPD5	glycerophosphodiester phosphodiesterase domain containing 5																																															PDS5A	PDS5, regulator of cohesion maintenance, homolog A (S. cerevisiae)
SEMA6B	sema domain, transmembrane domain (TM), and cytoplasmic domain, (semaphorin) 6B																																															RAP2C	RAP2C, member of RAS oncogene family
SCRT2	scratch homolog 2, zinc finger protein (Drosophila)																																															PCGF3	polycomb group ring finger 3
CCDC64	coiled-coil domain containing 64																																															FZD3	frizzled homolog 3 (Drosophila)
PVRL1	poliovirus receptor-related 1 (herpesvirus entry mediator C)																																															MDK	midkine (neurite growth-promoting factor 2)
FAM152A	family with sequence similarity 152, member A																																															E2F3	E2F transcription factor 3
CTDSPL	CTD (carboxy-terminal domain, RNA polymerase II, polypeptide A) small phosphatase-like																																															DPM2	dolichyl-phosphate mannosyltransferase polypeptide 2, regulatory subunit
ANKRD13B	ankyrin repeat domain 13B																																															TRIM36	tripartite motif-containing 36
PAX2	paired box 2																																															GOT2	glutamic-oxaloacetic transaminase 2, mitochondrial (aspartate aminotransferase 2)
ADCY1	adenylate cyclase 1 (brain)																																															H3F3B	H3 histone, family 3B (H3.3B)
DLST	dihydrolipoamide S-succinyltransferase (E2 component of 2-oxo-glutarate complex)																																															LPIN3	lipin 3
RAB6C	RAB6C, member RAS oncogene family																																															GRB2	growth factor receptor-bound protein 2
FAM5C	family with sequence similarity 5, member C																																															SHB	Src homology 2 domain containing adaptor protein B
																																																FBXW7	F-box and WD repeat domain containing 7
																																																MAX	MYC associated factor X
																																																MYST4	MYST histone acetyltransferase (monocytic leukemia) 4
																																																RAP2B	RAP2B, member of RAS oncogene family
																																																GDAP1	ganglioside-induced differentiation-associated protein 1
																																																CD97	CD97 molecule
																																																MEIS2	Meis homeobox 2
																																																GPR88	G protein-coupled receptor 88
																																																TFAP2C	transcription factor AP-2 gamma (activating enhancer binding protein 2 gamma)
																																																MYO10	myosin X
																																																PRRG1	proline rich Gla (G-carboxyglutamic acid) 1
																																																AUTS2	autism susceptibility candidate 2
																																																RP13-347D8.3	KIAA1210 protein
																																																EVI5	ecotropic viral integration site 5
																																																RAD9A	RAD9 homolog A (S. pombe)
																																																YTHDF1	YTH domain family, member 1
																																																INSM1	insulinoma-associated 1
																																																OXSR1	oxidative-stress responsive 1
																																																WDR40A	WD repeat domain 40A
																																																CXCL14	chemokine (C-X-C motif) ligand 14
																																																EIF5A2	eukaryotic translation initiation factor 5A2
																																																C21orf91	chromosome 21 open reading frame 91
																																																TNFRSF21	tumor necrosis factor receptor superfamily, member 21
																																																ZFP36L1	zinc finger protein 36, C3H type-like 1
																																																KCTD9	potassium channel tetramerisation domain containing 9
																																																PPP1CB	protein phosphatase 1, catalytic subunit, beta isoform
																																																EPN2	epsin 2
																																																PLAG1	pleiomorphic adenoma gene 1
																																																APBA2	amyloid beta (A4) precursor protein-binding, family A, member 2
																																																PHTF2	putative homeodomain transcription factor 2
																																																ID4	inhibitor of DNA binding 4, dominant negative helix-loop-helix protein
																																																SND1	staphylococcal nuclease and tudor domain containing 1
																																																EMR4P	egf-like module containing, mucin-like, hormone receptor-like 4 pseudogene
																																																RSU1	Ras suppressor protein 1
																																																BAHD1	bromo adjacent homology domain containing 1
																																																MGRN1	mahogunin, ring finger 1
																																																ZNF516	zinc finger protein 516
																																																TSC22D3	TSC22 domain family, member 3
																																																SKAP2	src kinase associated phosphoprotein 2
																																																PHF8	PHD finger protein 8
																																																CALM3	calmodulin 3 (phosphorylase kinase, delta)
																																																DPYSL3	dihydropyrimidinase-like 3
																																																ZMYM4	zinc finger, MYM-type 4
																																																GLRA3	glycine receptor, alpha 3
																																																CACNA1C	calcium channel, voltage-dependent, L type, alpha 1C subunit
																																																PLCG1	phospholipase C, gamma 1
																																																IL6R	interleukin 6 receptor
																																																ZMIZ1	zinc finger, MIZ-type containing 1
																																																RICH2	Rho-type GTPase-activating protein RICH2
																																																CRK	v-crk sarcoma virus CT10 oncogene homolog (avian)
																																																SMAP2	stromal membrane-associated GTPase-activating protein 2
																																																PPP1R11	protein phosphatase 1, regulatory (inhibitor) subunit 11
																																																FLNC	filamin C, gamma (actin binding protein 280)
																																																SMARCE1	SWI/SNF related, matrix associated, actin dependent regulator of chromatin, subfamily e, member 1
																																																C9orf58	chromosome 9 open reading frame 58
																																																NCDN	neurochondrin
																																																MEX3D	mex-3 homolog D (C. elegans)
																																																C17orf39	chromosome 17 open reading frame 39
																																																KCTD2	potassium channel tetramerisation domain containing 2
																																																PPP2R5B	protein phosphatase 2, regulatory subunit B', beta isoform
																																																CNBP	CCHC-type zinc finger, nucleic acid binding protein
																																																HIPK2	homeodomain interacting protein kinase 2
																																																TGFBR1	transforming growth factor, beta receptor I (activin A receptor type II-like kinase, 53kDa)
																																																PIK3R1	phosphoinositide-3-kinase, regulatory subunit 1 (alpha)
																																																MEX3A	mex-3 homolog A (C. elegans)
																																																OTUD7B	OTU domain containing 7B
																																																PHF20L1	PHD finger protein 20-like 1
																																																BAK1	BCL2-antagonist/killer 1
																																																UBE2Z	ubiquitin-conjugating enzyme E2Z
																																																FOXO3	forkhead box O3
																																																LPHN1	latrophilin 1
																																																TSPYL5	TSPY-like 5
																																																HDAC4	histone deacetylase 4
																																																SP1	Sp1 transcription factor
																																																MOBKL2C	MOB1, Mps One Binder kinase activator-like 2C (yeast)
																																																CCDC64B	coiled-coil domain containing 64B
																																																RIMS4	regulating synaptic membrane exocytosis 4
																																																PSCD3	pleckstrin homology, Sec7 and coiled-coil domains 3
																																																GPBP1	GC-rich promoter binding protein 1
[truncated: 20 more columns]

## Sheet: DOWN
hsa-mir-584		hsa-mir-221		hsa-let-7e		hsa-mir-1180		hsa-mir-1259		hsa-mir-338		hsa-mir-30a		hsa-mir-19		hsa-mir-545		hsa-mir-433		hsa-mir-582		hsa-mir-26a		hsa-mir-27		hsa-mir-452		hsa-mir-222		hsa-mir-660		hsa-miR-1974
Target gene	Gene name	Target gene	Gene name	Target gene	Gene name	Target gene	Gene name	Target gene	Gene name	Target gene	Gene name	Target gene		Target gene	Gene name	Target gene	Gene name	Target gene	Gene name	Target gene	Gene name	Target gene	Gene name	Target gene	Gene name	Target gene	Gene name	Target gene	Gene name	Target gene	Gene name	Target gene	Gene name
HBS1L	HBS1-like (S. cerevisiae)	SNX4	sorting nexin 4	HMGA2	high mobility group AT-hook 2	KIAA1267	KIAA1267	CRISPLD1	cysteine-rich secretory protein LCCL domain containing 1	PHC3	polyhomeotic homolog 3 (Drosophila)	CELSR3	cadherin, EGF LAG seven-pass G-type receptor 3 (flamingo homolog, Drosophila)	ZMYND11	zinc finger, MYND domain containing 11	USP9X	ubiquitin specific peptidase 9, X-linked	SULF1	sulfatase 1	EIF2S1	eukaryotic translation initiation factor 2, subunit 1 alpha, 35kDa	CHORDC1	cysteine and histidine-rich domain (CHORD)-containing 1	GLT8D3	glycosyltransferase 8 domain containing 3	FAM8A1	family with sequence similarity 8, member A1	SNX4	sorting nexin 4	DGKB	diacylglycerol kinase, beta 90kDa	OLFML2A	olfactomedin-like 2A
PRRX1	paired related homeobox 1	RGS6	regulator of G-protein signaling 6	C14orf28	chromosome 14 open reading frame 28	PUNC	putative neuronal cell adhesion molecule	NR3C2	nuclear receptor subfamily 3, group C, member 2	FAM84A	family with sequence similarity 84, member A	SNX16	sorting nexin 16	ADRB1	adrenergic, beta-1-, receptor	ROD1	ROD1 regulator of differentiation 1 (S. pombe)	GCLC	glutamate-cysteine ligase, catalytic subunit	RREB1	ras responsive element binding protein 1	POLR3G	polymerase (RNA) III (DNA directed) polypeptide G (32kD)	PLK2	polo-like kinase 2 (Drosophila)	DACT1	dapper, antagonist of beta-catenin, homolog 1 (Xenopus laevis)	RGS6	regulator of G-protein signaling 6	JPH1	junctophilin 1	CDH23	cadherin-like 23
NUFIP2	nuclear fragile X mental retardation protein interacting protein 2	OSTM1	osteopetrosis associated transmembrane protein 1	LIN28B	lin-28 homolog B (C. elegans)	FOXP4	forkhead box P4	CD83	CD83 molecule	NETO1	neuropilin (NRP) and tolloid (TLL)-like 1	S100PBP	S100P binding protein	LRP2	low density lipoprotein-related protein 2	ARGLU1	arginine and glutamate rich 1	ARMC1	armadillo repeat containing 1	GPC4	glypican 4	ATP11C	ATPase, class VI, type 11C	ACVR1C	activin A receptor, type IC	CASD1	CAS1 domain containing 1	OSTM1	osteopetrosis associated transmembrane protein 1	TFAP2B	transcription factor AP-2 beta (activating enhancer binding protein 2 beta)	FAM40B	family with sequence similarity 40, member B
FOXN3	forkhead box N3	TCF12	transcription factor 12 (HTF4, helix-loop-helix transcription factors 4)	FIGNL2	fidgetin-like 2	NRXN2	neurexin 2	PTEN	phosphatase and tensin homolog (mutated in multiple advanced cancers 1)	ST8SIA3	ST8 alpha-N-acetyl-neuraminide alpha-2,8-sialyltransferase 3	TNRC6A	trinucleotide repeat containing 6A	ATXN1	ataxin 1	TRIM33	tripartite motif-containing 33	FERMT2	fermitin family homolog 2 (Drosophila)	FOXO3	forkhead box O3	B3GNT5	UDP-GlcNAc:betaGal beta-1,3-N-acetylglucosaminyltransferase 5	MAP3K7IP3	mitogen-activated protein kinase kinase kinase 7 interacting protein 3	SNX18	sorting nexin 18	TCF12	transcription factor 12 (HTF4, helix-loop-helix transcription factors 4)	KIF3A	kinesin family member 3A	TMTC1	transmembrane and tetratricopeptide repeat containing 1
NCOR1	nuclear receptor co-repressor 1	KIT	v-kit Hardy-Zuckerman 4 feline sarcoma viral oncogene homolog	TRIM71	tripartite motif-containing 71	VEGFB	vascular endothelial growth factor B	LRRC2	leucine rich repeat containing 2	USP25	ubiquitin specific peptidase 25	KLHL28	kelch-like 28 (Drosophila)	CHIC1	cysteine-rich hydrophobic domain 1	LRP6	low density lipoprotein receptor-related protein 6	FOXN3	forkhead box N3	2010-09-07	septin 7	KLHDC5	kelch domain containing 5	DCUN1D4	DCN1, defective in cullin neddylation 1, domain containing 4 (S. cerevisiae)	METTL10	methyltransferase like 10	KIT	v-kit Hardy-Zuckerman 4 feline sarcoma viral oncogene homolog	ETV1	ets variant gene 1	ACACB	acetyl-Coenzyme A carboxylase beta
MYRIP	myosin VIIA and Rab interacting protein	CDKN1B	cyclin-dependent kinase inhibitor 1B (p27, Kip1)	IGF2BP1	insulin-like growth factor 2 mRNA binding protein 1	BAD	BCL2-antagonist of cell death	SENP1	SUMO1/sentrin specific peptidase 1	KAL1	Kallmann syndrome 1 sequence	RTKN2	rhotekin 2	AFF1	AF4/FMR2 family, member 1	ANKRD55	ankyrin repeat domain 55	ST8SIA4	ST8 alpha-N-acetyl-neuraminide alpha-2,8-sialyltransferase 4	PRDM4	PR domain containing 4	ALS2CR2	amyotrophic lateral sclerosis 2 (juvenile) chromosome region, candidate 2	ST6GALNAC3	ST6 (alpha-N-acetyl-neuraminyl-2,3-beta-galactosyl-1,3)-N-acetylgalactosaminide alpha-2,6-sialyltransferase 3	CNTN3	contactin 3 (plasmacytoma associated)	CDKN1B	cyclin-dependent kinase inhibitor 1B (p27, Kip1)	PFKFB2	6-phosphofructo-2-kinase/fructose-2,6-biphosphatase 2	SLC35A4	solute carrier family 35, member A4
XPR1	xenotropic and polytropic retrovirus receptor	RFXDC2	regulatory factor X domain containing 2	PUNC	putative neuronal cell adhesion molecule	SP1	Sp1 transcription factor	SMAP1	stromal membrane-associated GTPase-activating protein 1	WDR33	WD repeat domain 33	SCN2A	sodium channel, voltage-gated, type II, alpha subunit	LONRF1	LON peptidase N-terminal domain and ring finger 1	C10orf18	chromosome 10 open reading frame 18	CEP135	centrosomal protein 135kDa	PPP1R2	protein phosphatase 1, regulatory (inhibitor) subunit 2	FAM98A	family with sequence similarity 98, member A	PDS5B	PDS5, regulator of cohesion maintenance, homolog B (S. cerevisiae)	RPS6KA3	ribosomal protein S6 kinase, 90kDa, polypeptide 3	RFXDC2	regulatory factor X domain containing 2	SLC46A3	solute carrier family 46, member 3	AC110760.2	Protein PARM-1 precursor
CADPS	Ca2+-dependent secretion activator	RIMS3	regulating synaptic membrane exocytosis 3	ARID3B	AT rich interactive domain 3B (BRIGHT-like)	LPPR2	lipid phosphate phosphatase-related protein type 2	FAM19A2	family with sequence similarity 19 (chemokine (C-C motif)-like), member A2	ESRRG	estrogen-related receptor gamma	MKRN3	makorin, ring finger protein, 3	CLIP4	CAP-GLY domain containing linker protein family, member 4	BXDC5	brix domain containing 5	EPHA7	EPH receptor A7	H2AFV	H2A histone family, member V	SLC7A11	solute carrier family 7, (cationic amino acid transporter, y+ system) member 11	SLC6A1	solute carrier family 6 (neurotransmitter transporter, GABA), member 1	IMMP2L	IMP2 inner mitochondrial membrane peptidase-like (S. cerevisiae)	RIMS3	regulating synaptic membrane exocytosis 3	SPCS2	signal peptidase complex subunit 2 homolog (S. cerevisiae)
HNRNPU	heterogeneous nuclear ribonucleoprotein U (scaffold attachment factor A)	CXCL12	chemokine (C-X-C motif) ligand 12 (stromal cell-derived factor 1)	FIGN	fidgetin	INPPL1	inositol polyphosphate phosphatase-like 1	CPEB4	cytoplasmic polyadenylation element binding protein 4	TNPO1	transportin 1	B3GNT5	UDP-GlcNAc:betaGal beta-1,3-N-acetylglucosaminyltransferase 5	DSEL	dermatan sulfate epimerase-like	ZNF280C	zinc finger protein 280C	SFRS12IP1	SFRS12-interacting protein 1	BMPR2	bone morphogenetic protein receptor, type II (serine/threonine kinase)	SLC2A13	solute carrier family 2 (facilitated glucose transporter), member 13	GCC2	GRIP and coiled-coil domain containing 2	ABCB10	ATP-binding cassette, sub-family B (MDR/TAP), member 10	CXCL12	chemokine (C-X-C motif) ligand 12 (stromal cell-derived factor 1)	SMOC1	SPARC related modular calcium binding 1
STYX	serine/threonine/tyrosine interacting protein	VGLL4	vestigial like 4 (Drosophila)	THRSP	thyroid hormone responsive (SPOT14 homolog, rat)			FGF7	fibroblast growth factor 7 (keratinocyte growth factor)	SAPS3	SAPS domain family, member 3	LMBR1	limb region 1 homolog (mouse)	KCNJ2	potassium inwardly-rectifying channel, subfamily J, member 2	FGFR1	fibroblast growth factor receptor 1 (fms-related tyrosine kinase 2, Pfeiffer syndrome)	SASS6	spindle assembly 6 homolog (C. elegans)	FAM13A1	family with sequence similarity 13, member A1	LRRC2	leucine rich repeat containing 2	RGPD5	RANBP2-like and GRIP domain containing 5	LAMC1	laminin, gamma 1 (formerly LAMB2)	VGLL4	vestigial like 4 (Drosophila)	RNF219	ring finger protein 219
C7orf42	chromosome 7 open reading frame 42	HECTD2	HECT domain containing 2	PRTG	protogenin homolog (Gallus gallus)			ATRNL1	attractin-like 1	KLF2	Kruppel-like factor 2 (lung)	RUNX2	runt-related transcription factor 2	PMEPA1	prostate transmembrane protein, androgen induced 1	BCAT1	branched chain aminotransferase 1, cytosolic	CLCN5	chloride channel 5 (nephrolithiasis 2, X-linked, Dent disease)	TRPS1	trichorhinophalangeal syndrome I	KIAA1737	KIAA1737	ONECUT2	one cut homeobox 2	ZNF532	zinc finger protein 532	HECTD2	HECT domain containing 2	RP13-102H20.1	hypothetical protein FLJ30058
THBD	thrombomodulin	MYBL1	v-myb myeloblastosis viral oncogene homolog (avian)-like 1	SMARCAD1	SWI/SNF-related, matrix-associated actin-dependent regulator of chromatin, subfamily a, containing DEAD/H box 1			RPS6KA3	ribosomal protein S6 kinase, 90kDa, polypeptide 3	STAG2	stromal antigen 2	NEDD4	neural precursor cell expressed, developmentally down-regulated 4	RAB8B	RAB8B, member RAS oncogene family	MTX3	metaxin 3	SLC17A5	solute carrier family 17 (anion/sugar transporter), member 5	UCK2	uridine-cytidine kinase 2	NAP1L5	nucleosome assembly protein 1-like 5	GPAM	glycerol-3-phosphate acyltransferase, mitochondrial	SLC7A11	solute carrier family 7, (cationic amino acid transporter, y+ system) member 11	MYBL1	v-myb myeloblastosis viral oncogene homolog (avian)-like 1	APOOL	apolipoprotein O-like
AFF4	AF4/FMR2 family, member 4	GABRA1	gamma-aminobutyric acid (GABA) A receptor, alpha 1	ATPAF1	ATP synthase mitochondrial F1 complex assembly factor 1			MATN3	matrilin 3	MGAT4A	mannosyl (alpha-1,3-)-glycoprotein beta-1,4-N-acetylglucosaminyltransferase, isozyme A	LHX8	LIM homeobox 8	BMPR2	bone morphogenetic protein receptor, type II (serine/threonine kinase)	CSNK1G3	casein kinase 1, gamma 3	GLT8D3	glycosyltransferase 8 domain containing 3	UVRAG	UV radiation resistance associated gene	PTEN	phosphatase and tensin homolog (mutated in multiple advanced cancers 1)	PRKY	protein kinase, Y-linked	SERTAD2	SERTA domain containing 2	GABRA1	gamma-aminobutyric acid (GABA) A receptor, alpha 1	HIPK1	homeodomain interacting protein kinase 1
PHACTR1	phosphatase and actin regulator 1	2010-09-14	septin 14	YOD1	YOD1 OTU deubiquinating enzyme 1 homolog (S. cerevisiae)			FNDC3A	fibronectin type III domain containing 3A	NUDT15	nudix (nucleoside diphosphate linked moiety X)-type motif 15	KLHL20	kelch-like 20 (Drosophila)	SYT1	synaptotagmin I	PLAG1	pleiomorphic adenoma gene 1	HP1BP3	heterochromatin protein 1, binding protein 3	ACVR2B	activin A receptor, type IIB	REEP3	receptor accessory protein 3	FBXW7	F-box and WD repeat domain containing 7	PKN2	protein kinase N2	2010-09-14	septin 14	CDH13	cadherin 13, H-cadherin (heart)
SPOPL	speckle-type POZ protein-like	PAIP1	poly(A) binding protein interacting protein 1	GDAP2	ganglioside induced differentiation associated protein 2			C12orf29	chromosome 12 open reading frame 29	RAB28	RAB28, member RAS oncogene family	HNRNPA3	heterogeneous nuclear ribonucleoprotein A3	KBTBD8	kelch repeat and BTB (POZ) domain containing 8	MYLK	myosin light chain kinase	PPP3R1	protein phosphatase 3 (formerly 2B), regulatory subunit B, alpha isoform	PPP2CA	protein phosphatase 2 (formerly 2A), catalytic subunit, alpha isoform	TNRC6B	trinucleotide repeat containing 6B	FGD6	FYVE, RhoGEF and PH domain containing 6	UBA6	ubiquitin-like modifier activating enzyme 6	PAIP1	poly(A) binding protein interacting protein 1	AMN1	antagonist of mitotic exit network 1 homolog (S. cerevisiae)
TTYH3	tweety homolog 3 (Drosophila)	NAP1L5	nucleosome assembly protein 1-like 5	CLCN5	chloride channel 5 (nephrolithiasis 2, X-linked, Dent disease)			SPOPL	speckle-type POZ protein-like	TSHZ3	teashirt zinc finger homeobox 3	WDR7	WD repeat domain 7	CEP350	centrosomal protein 350kDa	EGR3	early growth response 3	ZC3H6	zinc finger CCCH-type containing 6	KCNT2	potassium channel, subfamily T, member 2	hCG_18385	similar to cAMP-regulated phosphoprotein	EYA4	eyes absent homolog 4 (Drosophila)	PAPD5	PAP associated domain containing 5	NAP1L5	nucleosome assembly protein 1-like 5	PCDH9	protocadherin 9
GANAB	glucosidase, alpha; neutral AB	EIF5A2	eukaryotic translation initiation factor 5A2	DNA2	DNA replication helicase 2 homolog (yeast)			SATB2	SATB homeobox 2	ETNK1	ethanolamine kinase 1	MTDH	metadherin	LDLR	low density lipoprotein receptor (familial hypercholesterolemia)	CUGBP2	CUG triplet repeat, RNA binding protein 2	MIER1	mesoderm induction early response 1 homolog (Xenopus laevis)	FKTN	fukutin	TET3	tet oncogene family member 3	PHLPPL	PH domain and leucine rich repeat protein phosphatase-like	RELN	reelin	EIF5A2	eukaryotic translation initiation factor 5A2	WDR40A	WD repeat domain 40A
DNAJC6	DnaJ (Hsp40) homolog, subfamily C, member 6	CPEB3	cytoplasmic polyadenylation element binding protein 3	TGFBR1	transforming growth factor, beta receptor I (activin A receptor type II-like kinase, 53kDa)			PRDM16	PR domain containing 16	YES1	v-yes-1 Yamaguchi sarcoma viral oncogene homolog 1	BRWD1	bromodomain and WD repeat domain containing 1	HSPC159	galectin-related protein	CUL3	cullin 3	ZNF615	zinc finger protein 615	SPIN3	spindlin family, member 3	LARP1	La ribonucleoprotein domain family, member 1	KITLG	KIT ligand	INTS8	integrator complex subunit 8	CPEB3	cytoplasmic polyadenylation element binding protein 3	TRPA1	transient receptor potential cation channel, subfamily A, member 1
WWC2	WW and C2 domain containing 2	ZFAND5	zinc finger, AN1-type domain 5	MASP1	mannan-binding lectin serine peptidase 1 (C4/C2 activating component of Ra-reactive factor)			ETS1	v-ets erythroblastosis virus E26 oncogene homolog 1 (avian)	MON2	MON2 homolog (S. cerevisiae)	EED	embryonic ectoderm development	TIA1	TIA1 cytotoxic granule-associated RNA binding protein	TDRKH	tudor and KH domain containing	CDC27	cell division cycle 27 homolog (S. cerevisiae)	A2BP1	ataxin 2-binding protein 1	FRMD4B	FERM domain containing 4B	SNAP25	synaptosomal-associated protein, 25kDa	PTPRJ	protein tyrosine phosphatase, receptor type, J	ZFAND5	zinc finger, AN1-type domain 5	HNRNPU	heterogeneous nuclear ribonucleoprotein U (scaffold attachment factor A)
HOXA11	homeobox A11	HRB	HIV-1 Rev binding protein	IGF1R	insulin-like growth factor 1 receptor			XK	X-linked Kx blood group (McLeod syndrome)	GOLT1B	golgi transport 1 homolog B (S. cerevisiae)	ZBTB41	zinc finger and BTB domain containing 41	ZNF831	zinc finger protein 831	USP15	ubiquitin specific peptidase 15	MTX3	metaxin 3	CUL3	cullin 3	RHOU	ras homolog gene family, member U	AFF4	AF4/FMR2 family, member 4	FILIP1L	filamin A interacting protein 1-like	HRB	HIV-1 Rev binding protein	ZBTB34	zinc finger and BTB domain containing 34
YKT6	YKT6 v-SNARE homolog (S. cerevisiae)	WDR35	WD repeat domain 35	PPP1R15B	protein phosphatase 1, regulatory (inhibitor) subunit 15B			C17orf91	chromosome 17 open reading frame 91	FRS2	fibroblast growth factor receptor substrate 2	TWF1	twinfilin, actin-binding protein, homolog 1 (Drosophila)	SEMA4C	sema domain, immunoglobulin domain (Ig), transmembrane domain (TM) and short cytoplasmic domain, (semaphorin) 4C	REEP1	receptor accessory protein 1	TIA1	TIA1 cytotoxic granule-associated RNA binding protein	CREB5	cAMP responsive element binding protein 5	STK39	serine threonine kinase 39 (STE20/SPS1 homolog, yeast)	C1orf173	chromosome 1 open reading frame 173	PPAPDC2	phosphatidic acid phosphatase type 2 domain containing 2	WDR35	WD repeat domain 35	G3BP2	GTPase activating protein (SH3 domain) binding protein 2
FBXW11	F-box and WD repeat domain containing 11	CREBZF	CREB/ATF bZIP transcription factor	DIAPH2	diaphanous homolog 2 (Drosophila)			KCNT2	potassium channel, subfamily T, member 2	HSPA5	heat shock 70kDa protein 5 (glucose-regulated protein, 78kDa)	PRDM1	PR domain containing 1, with ZNF domain	KPNA6	karyopherin alpha 6 (importin alpha 7)	DNM3	dynamin 3	EBF3	early B-cell factor 3	TNRC6A	trinucleotide repeat containing 6A	ETNK1	ethanolamine kinase 1	MAP2K4	mitogen-activated protein kinase kinase 4	XYLT1	xylosyltransferase I	CREBZF	CREB/ATF bZIP transcription factor	LAMP1	lysosomal-associated membrane protein 1
EML1	echinoderm microtubule associated protein like 1	PHACTR4	phosphatase and actin regulator 4	CCNJ	cyclin J			SH2D3C	SH2 domain containing 3C	TLK1	tousled-like kinase 1	SCN9A	sodium channel, voltage-gated, type IX, alpha subunit	ACBD5	acyl-Coenzyme A binding domain containing 5	TMEM135	transmembrane protein 135	CCDC138	coiled-coil domain containing 138	CREBBP	CREB binding protein (Rubinstein-Taybi syndrome)	NAB1	NGFI-A binding protein 1 (EGR1 binding protein 1)	PRKX	protein kinase, X-linked	DR1	down-regulator of transcription 1, TBP-binding (negative cofactor 2)	PHACTR4	phosphatase and actin regulator 4	KIAA0947	KIAA0947 protein
GABRA4	gamma-aminobutyric acid (GABA) A receptor, alpha 4	IRX5	iroquois homeobox 5	PXT1	peroxisomal, testis specific 1			SLC39A10	solute carrier family 39 (zinc transporter), member 10	ZNF770	zinc finger protein 770	NT5E	5'-nucleotidase, ecto (CD73)	ZNF238	zinc finger protein 238	NCOA3	nuclear receptor coactivator 3	CHD9	chromodomain helicase DNA binding protein 9	FERMT2	fermitin family homolog 2 (Drosophila)	DDX52	DEAD (Asp-Glu-Ala-Asp) box polypeptide 52	ZBTB34	zinc finger and BTB domain containing 34	FRMPD4	FERM and PDZ domain containing 4	IRX5	iroquois homeobox 5	USP53	ubiquitin specific peptidase 53
SLC30A7	solute carrier family 30 (zinc transporter), member 7	NRK	Nik related kinase	NPHP3	nephronophthisis 3 (adolescent)			KLF11	Kruppel-like factor 11	ARID4B	AT rich interactive domain 4B (RBP1-like)	TMEM170B	transmembrane protein 170B	DTNA	dystrobrevin, alpha	UBR3	ubiquitin protein ligase E3 component n-recognin 3 (putative)	PURB	purine-rich element binding protein B	FAM19A5	family with sequence similarity 19 (chemokine (C-C motif)-like), member A5	TET1	tet oncogene 1	GRIA4	glutamate receptor, ionotrophic, AMPA 4	FAM70A	family with sequence similarity 70, member A	NRK	Nik related kinase	DIAPH2	diaphanous homolog 2 (Drosophila)
PTP4A1	protein tyrosine phosphatase type IVA, member 1	DCUN1D1	DCN1, defective in cullin neddylation 1, domain containing 1 (S. cerevisiae)	GATM	glycine amidinotransferase (L-arginine:glycine amidinotransferase)			IMPACT	Impact homolog (mouse)	RAB6B	RAB6B, member RAS oncogene family	PIP4K2A	phosphatidylinositol-5-phosphate 4-kinase, type II, alpha	S1PR1	sphingosine-1-phosphate receptor 1	ANKRD50	ankyrin repeat domain 50	ENPP6	ectonucleotide pyrophosphatase/phosphodiesterase 6	THBS2	thrombospondin 2	ARPP-19	cyclic AMP phosphoprotein, 19 kD	RPS6KA5	ribosomal protein S6 kinase, 90kDa, polypeptide 5	COL23A1	collagen, type XXIII, alpha 1	DCUN1D1	DCN1, defective in cullin neddylation 1, domain containing 1 (S. cerevisiae)	STX16	syntaxin 16
RPL10	ribosomal protein L10	WSB2	WD repeat and SOCS box-containing 2	MRS2	MRS2 magnesium homeostasis factor homolog (S. cerevisiae)			ARHGAP5	Rho GTPase activating protein 5	C1orf96	chromosome 1 open reading frame 96	CCDC117	coiled-coil domain containing 117	PATL1	protein associated with topoisomerase II homolog 1 (yeast)	RDX	radixin	FBXO48	F-box protein 48	TPM4	tropomyosin 4	MAB21L1	mab-21-like 1 (C. elegans)	CDR2	cerebellar degeneration-related protein 2, 62kDa	RPA1	replication protein A1, 70kDa	WSB2	WD repeat and SOCS box-containing 2	DCBLD2	discoidin, CUB and LCCL domain containing 2
SCAMP5	secretory carrier membrane protein 5	RBM24	RNA binding motif protein 24	LRIG3	leucine-rich repeats and immunoglobulin-like domains 3			GLIS3	GLIS family zinc finger 3	EGR3	early growth response 3	PTGFRN	prostaglandin F2 receptor negative regulator	GRSF1	G-rich RNA sequence binding factor 1	FBXO30	F-box protein 30	SMC1A	structural maintenance of chromosomes 1A	FAM120A	family with sequence similarity 120A	NUS1	nuclear undecaprenyl pyrophosphate synthase 1 homolog (S. cerevisiae)	AP1GBP1	AP1 gamma subunit binding protein 1	ARMC10	armadillo repeat containing 10	RBM24	RNA binding motif protein 24	SOS1	son of sevenless homolog 1 (Drosophila)
MEX3B	mex-3 homolog B (C. elegans)	TP53BP2	tumor protein p53 binding protein, 2	ACVR1C	activin A receptor, type IC			CADM2	cell adhesion molecule 2	ACVR2A	activin A receptor, type IIA	PRUNE2	prune homolog 2 (Drosophila)	SLC24A3	solute carrier family 24 (sodium/potassium/calcium exchanger), member 3	PAPPA	pregnancy-associated plasma protein A, pappalysin 1	TOP1	topoisomerase (DNA) I	ZNF654	zinc finger protein 654	THAP2	THAP domain containing, apoptosis associated protein 2	SFXN2	sideroflexin 2	ANAPC4	anaphase promoting complex subunit 4	TP53BP2	tumor protein p53 binding protein, 2	APLP2	amyloid beta (A4) precursor-like protein 2
ZIC1	Zic family member 1 (odd-paired homolog, Drosophila)	KDR	kinase insert domain receptor (a type III receptor tyrosine kinase)	GJC1	gap junction protein, gamma 1, 45kDa			MED13	mediator complex subunit 13	ZNF271	zinc finger protein 271	MIER3	mesoderm induction early response 1, family member 3	HBP1	HMG-box transcription factor 1	SNAP25	synaptosomal-associated protein, 25kDa	C1orf131	chromosome 1 open reading frame 131	SLMO2	slowmo homolog 2 (Drosophila)	FAM8A1	family with sequence similarity 8, member A1	SLC7A11	solute carrier family 7, (cationic amino acid transporter, y+ system) member 11	BICD2	bicaudal D homolog 2 (Drosophila)	KDR	kinase insert domain receptor (a type III receptor tyrosine kinase)	NAP1L1	nucleosome assembly protein 1-like 1
DAND5	DAN domain family, member 5	WDR40A	WD repeat domain 40A	KCTD21	potassium channel tetramerisation domain containing 21			PLSCR3	phospholipid scramblase 3	TSHZ1	teashirt zinc finger homeobox 1	GALNT7	UDP-N-acetyl-alpha-D-galactosamine:polypeptide N-acetylgalactosaminyltransferase 7 (GalNAc-T7)	ATP2B2	ATPase, Ca++ transporting, plasma membrane 2	ACADSB	acyl-Coenzyme A dehydrogenase, short/branched chain	CYCS	cytochrome c, somatic	B3GALNT1	beta-1,3-N-acetylgalactosaminyltransferase 1 (globoside blood group)	EIF2S1	eukaryotic translation initiation factor 2, subunit 1 alpha, 35kDa	NRK	Nik related kinase	CNP	2',3'-cyclic nucleotide 3' phosphodiesterase	WDR40A	WD repeat domain 40A	KLF3	Kruppel-like factor 3 (basic)
LRRTM2	leucine rich repeat transmembrane neuronal 2	C18orf25	chromosome 18 open reading frame 25	MAP4K3	mitogen-activated protein kinase kinase kinase kinase 3			YWHAQ	tyrosine 3-monooxygenase/tryptophan 5-monooxygenase activation protein, theta polypeptide	RNF138	ring finger protein 138	CCNE2	cyclin E2	PRUNE2	prune homolog 2 (Drosophila)	SORBS2	sorbin and SH3 domain containing 2	TBC1D19	TBC1 domain family, member 19	PPP1R9A	protein phosphatase 1, regulatory (inhibitor) subunit 9A	NHS	Nance-Horan syndrome (congenital cataracts and dental anomalies)	LIN28B	lin-28 homolog B (C. elegans)	ANKS1B	ankyrin repeat and sterile alpha motif domain containing 1B	C18orf25	chromosome 18 open reading frame 25	ABAT	4-aminobutyrate aminotransferase
ELL2	elongation factor, RNA polymerase II, 2	LRRTM2	leucine rich repeat transmembrane neuronal 2	GDF6	growth differentiation factor 6			CASC3	cancer susceptibility candidate 3	ATP2C1	ATPase, Ca++ transporting, type 2C, member 1	RIMBP2	RIMS binding protein 2	LIMCH1	LIM and calponin homology domains 1	MFAP5	microfibrillar associated protein 5	WTAP	Wilms tumor 1 associated protein	RAD1	RAD1 homolog (S. pombe)	CLASP2	cytoplasmic linker associated protein 2	PCNX	pecanex homolog (Drosophila)	FLRT2	fibronectin leucine rich transmembrane protein 2	LRRTM2	leucine rich repeat transmembrane neuronal 2	HAO1	hydroxyacid oxidase (glycolate oxidase) 1
ABHD2	abhydrolase domain containing 2	PPP3R1	protein phosphatase 3 (formerly 2B), regulatory subunit B, alpha isoform	BZW1	basic leucine zipper and W2 domains 1			HNRNPA3	heterogeneous nuclear ribonucleoprotein A3	RAB1A	RAB1A, member RAS oncogene family	PPP1R2	protein phosphatase 1, regulatory (inhibitor) subunit 2	DMN	desmuslin	PTCH1	patched homolog 1 (Drosophila)	IGFBP1	insulin-like growth factor binding protein 1	WAPAL	wings apart-like homolog (Drosophila)	CASZ1	castor zinc finger 1	SHE	Src homology 2 domain containing E	NAP1L5	nucleosome assembly protein 1-like 5	PPP3R1	protein phosphatase 3 (formerly 2B), regulatory subunit B, alpha isoform	RANBP2	RAN binding protein 2
FZD7	frizzled homolog 7 (Drosophila)	PCMTD1	protein-L-isoaspartate (D-aspartate) O-methyltransferase domain containing 1	COIL	coilin			ANKRD11	ankyrin repeat domain 11	SPRY2	sprouty homolog 2 (Drosophila)	NFAT5	nuclear factor of activated T-cells 5, tonicity-responsive	GJA1	gap junction protein, alpha 1, 43kDa	FLRT2	fibronectin leucine rich transmembrane protein 2	MARK3	MAP/microtubule affinity-regulating kinase 3	WDR22	WD repeat domain 22	ULK1	unc-51-like kinase 1 (C. elegans)	SLC1A2	solute carrier family 1 (glial high affinity glutamate transporter), member 2	ADD3	adducin 3 (gamma)	PCMTD1	protein-L-isoaspartate (D-aspartate) O-methyltransferase domain containing 1	CNNM4	cyclin M4
ZNF512B	zinc finger protein 512B	RLBP1L2	retinaldehyde binding protein 1-like 2	STARD13	StAR-related lipid transfer (START) domain containing 13			QRICH1	glutamine-rich 1	ADM	adrenomedullin	ALS2CR8	amyotrophic lateral sclerosis 2 (juvenile) chromosome region, candidate 8	PAK6	p21 protein (Cdc42/Rac)-activated kinase 6	2010-09-11	septin 11	TLR10	toll-like receptor 10	FRMD4A	FERM domain containing 4A	SLC25A16	solute carrier family 25 (mitochondrial carrier; Graves disease autoantigen), member 16	ALG9	asparagine-linked glycosylation 9 homolog (S. cerevisiae, alpha- 1,2-mannosyltransferase)	ELAVL2	ELAV (embryonic lethal, abnormal vision, Drosophila)-like 2 (Hu antigen B)	RLBP1L2	retinaldehyde binding protein 1-like 2	LIFR	leukemia inhibitory factor receptor alpha
PLAG1	pleiomorphic adenoma gene 1	SCD5	stearoyl-CoA desaturase 5	ZNF275	zinc finger protein 275			FOXN3	forkhead box N3	NDFIP1	Nedd4 family interacting protein 1	CPSF6	cleavage and polyadenylation specific factor 6, 68kDa	KIAA0831	KIAA0831	RC3H1	ring finger and CCCH-type zinc finger domains 1	LRRTM2	leucine rich repeat transmembrane neuronal 2	PDIA3	protein disulfide isomerase family A, member 3	ALDH5A1	aldehyde dehydrogenase 5 family, member A1 (succinate-semialdehyde dehydrogenase)	TMEM170B	transmembrane protein 170B	CHD2	chromodomain helicase DNA binding protein 2	SCD5	stearoyl-CoA desaturase 5	EIF2C1	eukaryotic translation initiation factor 2C, 1
SFRS5	splicing factor, arginine/serine-rich 5	FNDC3A	fibronectin type III domain containing 3A	SMC1A	structural maintenance of chromosomes 1A			AKTIP	AKT interacting protein	SENP7	SUMO1/sentrin specific peptidase 7	LPPR4	plasticity related gene 1	DNAJC16	DnaJ (Hsp40) homolog, subfamily C, member 16	LRP12	low density lipoprotein-related protein 12	YWHAG	tyrosine 3-monooxygenase/tryptophan 5-monooxygenase activation protein, gamma polypeptide	BTRC	beta-transducin repeat containing	FAM136A	family with sequence similarity 136, member A	JHDM1D	jumonji C domain containing histone demethylase 1 homolog D (S. cerevisiae)	RNF169	ring finger protein 169	FNDC3A	fibronectin type III domain containing 3A	C5orf30	chromosome 5 open reading frame 30
CLEC5A	C-type lectin domain family 5, member A	DMRT3	doublesex and mab-3 related transcription factor 3	LRIG2	leucine-rich repeats and immunoglobulin-like domains 2			ABCE1	ATP-binding cassette, sub-family E (OABP), member 1	ZBTB44	zinc finger and BTB domain containing 44	FAM152A	family with sequence similarity 152, member A	SHCBP1	SHC SH2-domain binding protein 1	PDXDC1	pyridoxal-dependent decarboxylase domain containing 1	COQ3	coenzyme Q3 homolog, methyltransferase (S. cerevisiae)	CTNND2	catenin (cadherin-associated protein), delta 2 (neural plakophilin-related arm-repeat protein)	OTUD4	OTU domain containing 4	KIAA2018	KIAA2018	DYRK1A	dual-specificity tyrosine-(Y)-phosphorylation regulated kinase 1A	DMRT3	doublesex and mab-3 related transcription factor 3	HAS3	hyaluronan synthase 3
ETF1	eukaryotic translation termination factor 1	FUSIP1	FUS interacting protein (serine/arginine-rich) 1	GALNT1	UDP-N-acetyl-alpha-D-galactosamine:polypeptide N-acetylgalactosaminyltransferase 1 (GalNAc-T1)			AOF2	amine oxidase (flavin containing) domain 2	KL	klotho	TMEM181	transmembrane protein 181	ZC3HAV1L	zinc finger CCCH-type, antiviral 1-like	ARL3	ADP-ribosylation factor-like 3	TNRC6B	trinucleotide repeat containing 6B	NR2F2	nuclear receptor subfamily 2, group F, member 2	NIPA1	non imprinted in Prader-Willi/Angelman syndrome 1	KIAA1109	KIAA1109	TIMP3	TIMP metallopeptidase inhibitor 3 (Sorsby fundus dystrophy, pseudoinflammatory)	FUSIP1	FUS interacting protein (serine/arginine-rich) 1	CBLN2	cerebellin 2 precursor
C13orf37	chromosome 13 open reading frame 37	TMCC1	transmembrane and coiled-coil domain family 1	PGRMC1	progesterone receptor membrane component 1			SLC1A1	solute carrier family 1 (neuronal/epithelial high affinity glutamate transporter, system Xag), member 1	TRPC1	transient receptor potential cation channel, subfamily C, member 1	LYCAT	lysocardiolipin acyltransferase	TRIM2	tripartite motif-containing 2	PAK2	p21 protein (Cdc42/Rac)-activated kinase 2	RIOK3	RIO kinase 3 (yeast)	SERBP1	SERPINE1 mRNA binding protein 1	DOCK4	dedicator of cytokinesis 4	TNPO1	transportin 1	SERINC1	serine incorporator 1	TMCC1	transmembrane and coiled-coil domain family 1	GABRE	gamma-aminobutyric acid (GABA) A receptor, epsilon
ZNF629	zinc finger protein 629	CCDC64	coiled-coil domain containing 64	RANBP2	RAN binding protein 2			IKZF2	IKAROS family zinc finger 2 (Helios)	CENTD1	centaurin, delta 1	FAHD1	fumarylacetoacetate hydrolase domain containing 1	MKL2	MKL/myocardin-like 2	BMPR2	bone morphogenetic protein receptor, type II (serine/threonine kinase)	MYH9	myosin, heavy chain 9, non-muscle	GAS1	growth arrest-specific 1	SLC38A2	solute carrier family 38, member 2	RCAN2	regulator of calcineurin 2	EPS8	epidermal growth factor receptor pathway substrate 8	CCDC64	coiled-coil domain containing 64	GAS7	growth arrest-specific 7
DYRK2	dual-specificity tyrosine-(Y)-phosphorylation regulated kinase 2	SEC62	SEC62 homolog (S. cerevisiae)	BACH1	BTB and CNC homology 1, basic leucine zipper transcription factor 1			CCDC4	coiled-coil domain containing 4	AAK1	AP2 associated kinase 1	UBE2J1	ubiquitin-conjugating enzyme E2, J1 (UBC6 homolog, yeast)	RAPGEF2	Rap guanine nucleotide exchange factor (GEF) 2	FLCN	folliculin	ADRA1A	adrenergic, alpha-1A-, receptor	ZNF362	zinc finger protein 362	SAMD12	sterile alpha motif domain containing 12	HIPK2	homeodomain interacting protein kinase 2	SUMO3	SMT3 suppressor of mif two 3 homolog 3 (S. cerevisiae)	SEC62	SEC62 homolog (S. cerevisiae)	TRIM67	tripartite motif-containing 67
CAPRIN1	cell cycle associated protein 1	PLEKHA2	pleckstrin homology domain containing, family A (phosphoinositide binding specific) member 2	ZNF583	zinc finger protein 583			PPP1R3A	protein phosphatase 1, regulatory (inhibitor) subunit 3A	PCGF5	polycomb group ring finger 5	ZNRF1	zinc and ring finger 1	SPOCK1	sparc/osteonectin, cwcv and kazal-like domains proteoglycan (testican) 1	FAM70A	family with sequence similarity 70, member A	RECQL	RecQ protein-like (DNA helicase Q1-like)	PCSK2	proprotein convertase subtilisin/kexin type 2	CEP350	centrosomal protein 350kDa	KCNK2	potassium channel, subfamily K, member 2	ASAH1	N-acylsphingosine amidohydrolase (acid ceramidase) 1	PLEKHA2	pleckstrin homology domain containing, family A (phosphoinositide binding specific) member 2	TOX	thymocyte selection-associated high mobility group box
IREB2	iron-responsive element binding protein 2	NTF3	neurotrophin 3	GLT8D3	glycosyltransferase 8 domain containing 3			PKD2	polycystic kidney disease 2 (autosomal dominant)	LRRCC1	leucine rich repeat and coiled-coil domain containing 1	USP45	ubiquitin specific peptidase 45	RNF11	ring finger protein 11	C14orf43	chromosome 14 open reading frame 43	TMEM33	transmembrane protein 33	LOC162073	hypothetical protein LOC162073	SYT10	synaptotagmin X	MBTD1	mbt domain containing 1	MAB21L2	mab-21-like 2 (C. elegans)	NTF3	neurotrophin 3	ESRRG	estrogen-related receptor gamma
KIAA0494	KIAA0494	MIA3	melanoma inhibitory activity family, member 3	FNDC3A	fibronectin type III domain containing 3A			MEF2C	myocyte enhancer factor 2C	RHEB	Ras homolog enriched in brain	SSR3	signal sequence receptor, gamma (translocon-associated protein gamma)	KIAA1211	KIAA1211 protein	ENPP1	ectonucleotide pyrophosphatase/phosphodiesterase 1	TTC13	tetratricopeptide repeat domain 13	YTHDF3	YTH domain family, member 3	NARG1	NMDA receptor regulated 1	SOX11	SRY (sex determining region Y)-box 11	ARL1	ADP-ribosylation factor-like 1	MIA3	melanoma inhibitory activity family, member 3	RAP1A	RAP1A, member of RAS oncogene family
SYT7	synaptotagmin VII	ARF4	ADP-ribosylation factor 4	RP5-1022P6.2	hypothetical protein KIAA1434			NIPA1	non imprinted in Prader-Willi/Angelman syndrome 1	FMNL2	formin-like 2	LIMCH1	LIM and calponin homology domains 1	NEUROD1	neurogenic differentiation 1	UFM1	ubiquitin-fold modifier 1	ACTC1	actin, alpha, cardiac muscle 1	ASCL1	achaete-scute complex homolog 1 (Drosophila)	KLHL18	kelch-like 18 (Drosophila)	SLC39A11	solute carrier family 39 (metal ion transporter), member 11	CDKN1B	cyclin-dependent kinase inhibitor 1B (p27, Kip1)	ARF4	ADP-ribosylation factor 4	CNOT6L	CCR4-NOT transcription complex, subunit 6-like
WSB2	WD repeat and SOCS box-containing 2	AMMECR1	Alport syndrome, mental retardation, midface hypoplasia and elliptocytosis chromosomal region, gene 1	ADRB2	adrenergic, beta-2-, receptor, surface			TET2	tet oncogene family member 2	KAT2B	K(lysine) acetyltransferase 2B	EEA1	early endosome antigen 1	PRICKLE2	prickle homolog 2 (Drosophila)	SPTBN1	spectrin, beta, non-erythrocytic 1	AKAP9	A kinase (PRKA) anchor protein (yotiao) 9	CLCN5	chloride channel 5 (nephrolithiasis 2, X-linked, Dent disease)	RBM46	RNA binding motif protein 46	FAM126A	family with sequence similarity 126, member A	NCOA7	nuclear receptor coactivator 7	AMMECR1	Alport syndrome, mental retardation, midface hypoplasia and elliptocytosis chromosomal region, gene 1	PICALM	phosphatidylinositol binding clathrin assembly protein
OLA1	Obg-like ATPase 1	NSUN4	NOL1/NOP2/Sun domain family, member 4	ZNF322A	zinc finger protein 322A			PARG	poly (ADP-ribose) glycohydrolase	RB1CC1	RB1-inducible coiled-coil 1	RFXDC1	regulatory factor X domain containing 1	SLC35F1	solute carrier family 35, member F1	CYP26B1	cytochrome P450, family 26, subfamily B, polypeptide 1	HNRNPU	heterogeneous nuclear ribonucleoprotein U (scaffold attachment factor A)	RDX	radixin	EPC2	enhancer of polycomb homolog 2 (Drosophila)	TRIM2	tripartite motif-containing 2	ANK2	ankyrin 2, neuronal	NSUN4	NOL1/NOP2/Sun domain family, member 4	ATP11C	ATPase, class VI, type 11C
BCOR	BCL6 co-repressor	MYLIP	myosin regulatory light chain interacting protein	AHCTF1	AT hook containing transcription factor 1			MEX3A	mex-3 homolog A (C. elegans)	AHR	aryl hydrocarbon receptor	CYP24A1	cytochrome P450, family 24, subfamily A, polypeptide 1	RAP2C	RAP2C, member of RAS oncogene family	CPSF6	cleavage and polyadenylation specific factor 6, 68kDa	FBXW7	F-box and WD repeat domain containing 7	JDP2	Jun dimerization protein 2	LNX2	ligand of numb-protein X 2	RMND5A	required for meiotic nuclear division 5 homolog A (S. cerevisiae)	SPTLC2	serine palmitoyltransferase, long chain base subunit 2	MYLIP	myosin regulatory light chain interacting protein	DYRK1A	dual-specificity tyrosine-(Y)-phosphorylation regulated kinase 1A
PITX1	paired-like homeodomain 1	GRB10	growth factor receptor-bound protein 10	OSMR	oncostatin M receptor			ATP7A	ATPase, Cu++ transporting, alpha polypeptide (Menkes syndrome)	C6orf168	chromosome 6 open reading frame 168	YOD1	YOD1 OTU deubiquinating enzyme 1 homolog (S. cerevisiae)	CPD	carboxypeptidase D	MED20	mediator complex subunit 20	FAM91A1	family with sequence similarity 91, member A1	CTNNB1	catenin (cadherin-associated protein), beta 1, 88kDa	PLOD2	procollagen-lysine, 2-oxoglutarate 5-dioxygenase 2	ABCA1	ATP-binding cassette, sub-family A (ABC1), member 1	ROBO2	roundabout, axon guidance receptor, homolog 2 (Drosophila)	GRB10	growth factor receptor-bound protein 10	CACNA1C	calcium channel, voltage-dependent, L type, alpha 1C subunit
MARCKS	myristoylated alanine-rich protein kinase C substrate	SNAP29	synaptosomal-associated protein, 29kDa	SLC5A9	solute carrier family 5 (sodium/glucose cotransporter), member 9			TSHZ3	teashirt zinc finger homeobox 3	RBM35A	RNA binding motif protein 35A	LIN28B	lin-28 homolog B (C. elegans)	ITGB8	integrin, beta 8	WEE1	WEE1 homolog (S. pombe)	GRB2	growth factor receptor-bound protein 2	GJA1	gap junction protein, alpha 1, 43kDa	WNK3	WNK lysine deficient protein kinase 3	ARFGEF1	ADP-ribosylation factor guanine nucleotide-exchange factor 1(brefeldin A-inhibited)	PURA	purine-rich element binding protein A	SNAP29	synaptosomal-associated protein, 29kDa	TANC2	tetratricopeptide repeat, ankyrin repeat and coiled-coil containing 2
KIAA0831	KIAA0831	AP3B2	adaptor-related protein complex 3, beta 2 subunit	COL1A2	collagen, type I, alpha 2			STAG3L4	stromal antigen 3-like 4	WDR47	WD repeat domain 47	USP37	ubiquitin specific peptidase 37	FAM116A	family with sequence similarity 116, member A	ZC3H6	zinc finger CCCH-type containing 6	ELOVL2	elongation of very long chain fatty acids (FEN1/Elo2, SUR4/Elo3, yeast)-like 2	VTA1	Vps20-associated 1 homolog (S. cerevisiae)	RNF141	ring finger protein 141	USP42	ubiquitin specific peptidase 42	AFF1	AF4/FMR2 family, member 1	AP3B2	adaptor-related protein complex 3, beta 2 subunit	ETF1	eukaryotic translation termination factor 1
LRP6	low density lipoprotein receptor-related protein 6	ZC3H13	zinc finger CCCH-type containing 13	ERCC6	excision repair cross-complementing rodent repair deficiency, complementation group 6			GNG2	guanine nucleotide binding protein (G protein), gamma 2	PAN3	PAN3 polyA specific ribonuclease subunit homolog (S. cerevisiae)	DPY19L1	dpy-19-like 1 (C. elegans)	ZBTB11	zinc finger and BTB domain containing 11	IL1A	interleukin 1, alpha	USP6	ubiquitin specific peptidase 6 (Tre-2 oncogene)	UBE2NL	ubiquitin-conjugating enzyme E2N-like	ZIC5	Zic family member 5 (odd-paired homolog, Drosophila)	SOS1	son of sevenless homolog 1 (Drosophila)	C13orf1	chromosome 13 open reading frame 1	ZC3H13	zinc finger CCCH-type containing 13	MAP1A	microtubule-associated protein 1A
ZBTB44	zinc finger and BTB domain containing 44	MIER3	mesoderm induction early response 1, family member 3	HIF1AN	hypoxia-inducible factor 1, alpha subunit inhibitor			DLG3	discs, large homolog 3 (neuroendocrine-dlg, Drosophila)	SPAST	spastin	SDAD1	SDA1 domain containing 1	C10orf46	chromosome 10 open reading frame 46	LRP1	low density lipoprotein-related protein 1 (alpha-2-macroglobulin receptor)	HIVEP1	human immunodeficiency virus type I enhancer binding protein 1	WBP2	WW domain binding protein 2	OSBPL11	oxysterol binding protein-like 11	CCNG1	cyclin G1	RAI1	retinoic acid induced 1	MIER3	mesoderm induction early response 1, family member 3	BTBD9	BTB (POZ) domain containing 9
IL33	interleukin 33	CASZ1	castor zinc finger 1	LIMD2	LIM domain containing 2			MED1	mediator complex subunit 1	ETS1	v-ets erythroblastosis virus E26 oncogene homolog 1 (avian)	RBM12	RNA binding motif protein 12	ITSN1	intersectin 1 (SH3 domain protein)	TACC2	transforming, acidic coiled-coil containing protein 2	PCTK2	PCTAIRE protein kinase 2	MED26	mediator complex subunit 26	TTC13	tetratricopeptide repeat domain 13	SLC9A4	solute carrier family 9 (sodium/hydrogen exchanger), member 4	TLK1	tousled-like kinase 1	CASZ1	castor zinc finger 1	NPTX1	neuronal pentraxin I
FAM19A5	family with sequence similarity 19 (chemokine (C-C motif)-like), member A5	SBK1	SH3-binding domain kinase 1	GNPTAB	N-acetylglucosamine-1-phosphate transferase, alpha and beta subunits			ADAMTS19	ADAM metallopeptidase with thrombospondin type 1 motif, 19	PKN2	protein kinase N2	SH3PXD2A	SH3 and PX domains 2A	C10orf140	chromosome 10 open reading frame 140	ARNT	aryl hydrocarbon receptor nuclear translocator	XRCC6BP1	XRCC6 binding protein 1	YWHAQ	tyrosine 3-monooxygenase/tryptophan 5-monooxygenase activation protein, theta polypeptide	CPSF2	cleavage and polyadenylation specific factor 2, 100kDa	SLITRK1	SLIT and NTRK-like family, member 1	RNF139	ring finger protein 139	SBK1	SH3-binding domain kinase 1	PLA2G3	phospholipase A2, group III
ASPH	aspartate beta-hydroxylase	KIF16B	kinesin family member 16B	FAM103A1	family with sequence similarity 103, member A1			UQCC	ubiquinol-cytochrome c reductase complex chaperone, CBP3 homolog (yeast)	CAST	calpastatin	MEX3B	mex-3 homolog B (C. elegans)	KATNAL1	katanin p60 subunit A-like 1	USP9Y	ubiquitin specific peptidase 9, Y-linked (fat facets-like, Drosophila)	SLU7	SLU7 splicing factor homolog (S. cerevisiae)	TBR1	T-box, brain, 1	USP9X	ubiquitin specific peptidase 9, X-linked	RPGRIP1L	RPGRIP1-like	ERC2	ELKS/RAB6-interacting/CAST family member 2	KIF16B	kinesin family member 16B	C14orf147	chromosome 14 open reading frame 147
GPHN	gephyrin	ZFPM2	zinc finger protein, multitype 2	SLC35D2	solute carrier family 35, member D2			IRX1	iroquois homeobox 1	NF1	neurofibromin 1 (neurofibromatosis, von Recklinghausen disease, Watson disease)	STIM2	stromal interaction molecule 2	PHTF2	putative homeodomain transcription factor 2	PSAT1	phosphoserine aminotransferase 1	E2F3	E2F transcription factor 3	BEST3	bestrophin 3	CXADR	coxsackie virus and adenovirus receptor	RUNX1	runt-related transcription factor 1 (acute myeloid leukemia 1; aml1 oncogene)	HMGB3	high-mobility group box 3	ZFPM2	zinc finger protein, multitype 2	PPP1R12B	protein phosphatase 1, regulatory (inhibitor) subunit 12B
PDGFA	platelet-derived growth factor alpha polypeptide	KIAA1370	KIAA1370	CYP19A1	cytochrome P450, family 19, subfamily A, polypeptide 1			LRIG3	leucine-rich repeats and immunoglobulin-like domains 3	CRKRS	Cdc2-related kinase, arginine/serine-rich	C13orf37	chromosome 13 open reading frame 37	ZPLD1	zona pellucida-like domain containing 1	MXRA7	matrix-remodelling associated 7	B4GALT3	UDP-Gal:betaGlcNAc beta 1,4- galactosyltransferase, polypeptide 3	PPP1CB	protein phosphatase 1, catalytic subunit, beta isoform	TTPAL	tocopherol (alpha) transfer protein-like	LIFR	leukemia inhibitory factor receptor alpha	IGF1	insulin-like growth factor 1 (somatomedin C)	KIAA1370	KIAA1370	SDC1	syndecan 1
PATZ1	POZ (BTB) and AT hook containing zinc finger 1	AIDA	axin interactor, dorsalization associated	NAP1L1	nucleosome assembly protein 1-like 1			ACAN	aggrecan	ANP32E	acidic (leucine-rich) nuclear phosphoprotein 32 family, member E	GABRB1	gamma-aminobutyric acid (GABA) A receptor, beta 1	ACSL4	acyl-CoA synthetase long-chain family member 4	GNAI3	guanine nucleotide binding protein (G protein), alpha inhibiting activity polypeptide 3	GALNT1	UDP-N-acetyl-alpha-D-galactosamine:polypeptide N-acetylgalactosaminyltransferase 1 (GalNAc-T1)	FOXN3	forkhead box N3	tcag7.1228	hypothetical protein FLJ25778	GOLM1	golgi membrane protein 1	ZNF518A	zinc finger protein 518A	AIDA	axin interactor, dorsalization associated	CUGBP2	CUG triplet repeat, RNA binding protein 2
ATRN	attractin	PLCL2	phospholipase C-like 2	LAMP2	lysosomal-associated membrane protein 2			PDCD7	programmed cell death 7	CNOT6L	CCR4-NOT transcription complex, subunit 6-like	CHL1	cell adhesion molecule with homology to L1CAM (close homolog of L1)	ARL6IP2	ADP-ribosylation factor-like 6 interacting protein 2	PIP4K2C	phosphatidylinositol-5-phosphate 4-kinase, type II, gamma	CTNNA1	catenin (cadherin-associated protein), alpha 1, 102kDa	MLL2	myeloid/lymphoid or mixed-lineage leukemia 2	AADACL1	arylacetamide deacetylase-like 1	CSNK1G1	casein kinase 1, gamma 1	DHX40	DEAH (Asp-Glu-Ala-His) box polypeptide 40	PLCL2	phospholipase C-like 2	TRIM9	tripartite motif-containing 9
TET3	tet oncogene family member 3	DPP8	dipeptidyl-peptidase 8	ADAMTS8	ADAM metallopeptidase with thrombospondin type 1 motif, 8			PPP1CB	protein phosphatase 1, catalytic subunit, beta isoform	C3orf63	chromosome 3 open reading frame 63	BNIP3L	BCL2/adenovirus E1B 19kDa interacting protein 3-like	EPS15	epidermal growth factor receptor pathway substrate 15	KIAA0895	KIAA0895 protein	NR2F6	nuclear receptor subfamily 2, group F, member 6	PUM2	pumilio homolog 2 (Drosophila)	C5orf41	chromosome 5 open reading frame 41	GRSF1	G-rich RNA sequence binding factor 1	SEC23A	Sec23 homolog A (S. cerevisiae)	DPP8	dipeptidyl-peptidase 8	TBC1D22B	TBC1 domain family, member 22B
MECP2	methyl CpG binding protein 2 (Rett syndrome)	GTF2E1	general transcription factor IIE, polypeptide 1, alpha 56kDa	XKR8	XK, Kell blood group complex subunit-related family, member 8			ZFPM2	zinc finger protein, multitype 2	AZIN1	antizyme inhibitor 1	AVEN	apoptosis, caspase activation inhibitor	KIAA0256	KIAA0256 gene product	KIF1B	kinesin family member 1B	KIAA0195	KIAA0195	SYDE1	synapse defective 1, Rho GTPase, homolog 1 (C. elegans)	SULF1	sulfatase 1	UNKL	unkempt homolog (Drosophila)-like	GRM3	glutamate receptor, metabotropic 3	GTF2E1	general transcription factor IIE, polypeptide 1, alpha 56kDa	SOX5	SRY (sex determining region Y)-box 5
TCF12	transcription factor 12 (HTF4, helix-loop-helix transcription factors 4)	SYT10	synaptotagmin X	BCAT1	branched chain aminotransferase 1, cytosolic			GRHL1	grainyhead-like 1 (Drosophila)	BCL2L11	BCL2-like 11 (apoptosis facilitator)	CHMP2B	chromatin modifying protein 2B	RBBP8	retinoblastoma binding protein 8	UBR5	ubiquitin protein ligase E3 component n-recognin 5	ARRDC4	arrestin domain containing 4	MAP3K5	mitogen-activated protein kinase kinase kinase 5	BRWD1	bromodomain and WD repeat domain containing 1	TRIM23	tripartite motif-containing 23	RAD23B	RAD23 homolog B (S. cerevisiae)	SYT10	synaptotagmin X	UBXD8	UBX domain containing 8
SLC5A3	solute carrier family 5 (inositol transporters), member 3	tcag7.1228	hypothetical protein FLJ25778	UHRF2	ubiquitin-like, containing PHD and RING finger domains, 2			ZZZ3	zinc finger, ZZ-type containing 3	NAB1	NGFI-A binding protein 1 (EGR1 binding protein 1)	SEC24A	SEC24 related gene family, member A (S. cerevisiae)	PTEN	phosphatase and tensin homolog (mutated in multiple advanced cancers 1)	TFEC	transcription factor EC	ST6GALNAC3	ST6 (alpha-N-acetyl-neuraminyl-2,3-beta-galactosyl-1,3)-N-acetylgalactosaminide alpha-2,6-sialyltransferase 3	SMAD2	SMAD family member 2	ULK2	unc-51-like kinase 2 (C. elegans)	STAB2	stabilin 2	RAB11A	RAB11A, member RAS oncogene family	tcag7.1228	hypothetical protein FLJ25778	KIAA1244	KIAA1244
HOMER2	homer homolog 2 (Drosophila)	WDR47	WD repeat domain 47	MARS2	methionyl-tRNA synthetase 2, mitochondrial			SLC9A2	solute carrier family 9 (sodium/hydrogen exchanger), member 2	KRAS	v-Ki-ras2 Kirsten rat sarcoma viral oncogene homolog	STX17	syntaxin 17	CCDC4	coiled-coil domain containing 4	RAB10	RAB10, member RAS oncogene family	AAK1	AP2 associated kinase 1	NHS	Nance-Horan syndrome (congenital cataracts and dental anomalies)	CREBZF	CREB/ATF bZIP transcription factor	GNS	glucosamine (N-acetyl)-6-sulfatase (Sanfilippo disease IIID)	C5orf13	chromosome 5 open reading frame 13	WDR47	WD repeat domain 47	SNX18	sorting nexin 18
FBXO11	F-box protein 11	UNC84B	unc-84 homolog B (C. elegans)	COL3A1	collagen, type III, alpha 1			HNRNPA0	heterogeneous nuclear ribonucleoprotein A0	PICALM	phosphatidylinositol binding clathrin assembly protein	GLCE	glucuronic acid epimerase	LRIG3	leucine-rich repeats and immunoglobulin-like domains 3	SMCR7L	Smith-Magenis syndrome chromosome region, candidate 7-like	SRFBP1	serum response factor binding protein 1	NARG1	NMDA receptor regulated 1	DNA2	DNA replication helicase 2 homolog (yeast)	KRAS	v-Ki-ras2 Kirsten rat sarcoma viral oncogene homolog	TIMP2	TIMP metallopeptidase inhibitor 2	UNC84B	unc-84 homolog B (C. elegans)	FAM46C	family with sequence similarity 46, member C
HIF3A	hypoxia inducible factor 3, alpha subunit	CHSY1	chondroitin sulfate synthase 1	MYCN	v-myc myelocytomatosis viral related oncogene, neuroblastoma derived (avian)			TPH2	tryptophan hydroxylase 2	NIPBL	Nipped-B homolog (Drosophila)	PTPN13	protein tyrosine phosphatase, non-receptor type 13 (APO-1/CD95 (Fas)-associated phosphatase)	ELL2	elongation factor, RNA polymerase II, 2	MBOAT2	membrane bound O-acyltransferase domain containing 2	SFRS12	splicing factor, arginine/serine-rich 12	ELAVL3	ELAV (embryonic lethal, abnormal vision, Drosophila)-like 3 (Hu antigen C)	TP53INP1	tumor protein p53 inducible nuclear protein 1	GCA	grancalcin, EF-hand calcium binding protein	CCNT2	cyclin T2	CHSY1	chondroitin sulfate synthase 1	JHDM1D	jumonji C domain containing histone demethylase 1 homolog D (S. cerevisiae)
C14orf101	chromosome 14 open reading frame 101	PPP1R15B	protein phosphatase 1, regulatory (inhibitor) subunit 15B	KCNJ11	potassium inwardly-rectifying channel, subfamily J, member 11			EMP1	epithelial membrane protein 1	C1orf52	chromosome 1 open reading frame 52	ZPBP2	zona pellucida binding protein 2	MPPED2	metallophosphoesterase domain containing 2	BMP6	bone morphogenetic protein 6	TGFBR1	transforming growth factor, beta receptor I (activin A receptor type II-like kinase, 53kDa)	ORMDL2	ORM1-like 2 (S. cerevisiae)	ACBD5	acyl-Coenzyme A binding domain containing 5	ABL2	v-abl Abelson murine leukemia viral oncogene homolog 2 (arg, Abelson-related gene)	TMEM147	transmembrane protein 147	PPP1R15B	protein phosphatase 1, regulatory (inhibitor) subunit 15B	LIMK2	LIM domain kinase 2
HSPA5	heat shock 70kDa protein 5 (glucose-regulated protein, 78kDa)	CAMKK1	calcium/calmodulin-dependent protein kinase kinase 1, alpha	ZNF566	zinc finger protein 566			BBX	bobby sox homolog (Drosophila)	GPR116	G protein-coupled receptor 116	FAM160B1	family with sequence similarity 160, member B1	ST7	suppression of tumorigenicity 7	FAM122B	family with sequence similarity 122B	SMAD2	SMAD family member 2	FGF7	fibroblast growth factor 7 (keratinocyte growth factor)	E2F7	E2F transcription factor 7	GALNT7	UDP-N-acetyl-alpha-D-galactosamine:polypeptide N-acetylgalactosaminyltransferase 7 (GalNAc-T7)	CEP350	centrosomal protein 350kDa	CAMKK1	calcium/calmodulin-dependent protein kinase kinase 1, alpha	TTC23L	tetratricopeptide repeat domain 23-like
FEM1C	fem-1 homolog c (C. elegans)	GARNL1	GTPase activating Rap/RanGAP domain-like 1	STX3	syntaxin 3			PCSK6	proprotein convertase subtilisin/kexin type 6	TTC33	tetratricopeptide repeat domain 33	C20orf108	chromosome 20 open reading frame 108	TRIM33	tripartite motif-containing 33	CPD	carboxypeptidase D	PCCB	propionyl Coenzyme A carboxylase, beta polypeptide	TBL1X	transducin (beta)-like 1X-linked	ACVR1C	activin A receptor, type IC	CEP135	centrosomal protein 135kDa	GOSR2	golgi SNAP receptor complex member 2	GARNL1	GTPase activating Rap/RanGAP domain-like 1	PPARGC1A	peroxisome proliferator-activated receptor gamma, coactivator 1 alpha
GABRB2	gamma-aminobutyric acid (GABA) A receptor, beta 2	STK24	serine/threonine kinase 24 (STE20 homolog, yeast)	CPEB1	cytoplasmic polyadenylation element binding protein 1			2010-09-07	septin 7	SLC6A1	solute carrier family 6 (neurotransmitter transporter, GABA), member 1	TAOK1	TAO kinase 1	CYLD	cylindromatosis (turban tumor syndrome)	RNF38	ring finger protein 38	GATA3	GATA binding protein 3	C17orf63	chromosome 17 open reading frame 63	NID1	nidogen 1	ARHGEF6	Rac/Cdc42 guanine nucleotide exchange factor (GEF) 6	ANKRD27	ankyrin repeat domain 27 (VPS9 domain)	STK24	serine/threonine kinase 24 (STE20 homolog, yeast)	C10orf71	chromosome 10 open reading frame 71
PHACTR4	phosphatase and actin regulator 4	SLC2A13	solute carrier family 2 (facilitated glucose transporter), member 13	C8orf58	chromosome 8 open reading frame 58			PTBP2	polypyrimidine tract binding protein 2	HDAC9	histone deacetylase 9	STOX2	storkhead box 2	SIN3B	SIN3 homolog B, transcription regulator (yeast)	ADAMTS16	ADAM metallopeptidase with thrombospondin type 1 motif, 16	INTS2	integrator complex subunit 2	YWHAZ	tyrosine 3-monooxygenase/tryptophan 5-monooxygenase activation protein, zeta polypeptide	PLEKHH1	pleckstrin homology domain containing, family H (with MyTH4 domain) member 1	TNRC18	trinucleotide repeat containing 18	MAP4K4	mitogen-activated protein kinase kinase kinase kinase 4	SLC2A13	solute carrier family 2 (facilitated glucose transporter), member 13	NR3C1	nuclear receptor subfamily 3, group C, member 1 (glucocorticoid receptor)
SPRY4	sprouty homolog 4 (Drosophila)	C3orf70	chromosome 3 open reading frame 70	HAND1	heart and neural crest derivatives expressed 1			BMP4	bone morphogenetic protein 4	CTGF	connective tissue growth factor	YAF2	YY1 associated factor 2	KLHDC5	kelch domain containing 5	MTMR10	myotubularin related protein 10	CFTR	cystic fibrosis transmembrane conductance regulator (ATP-binding cassette sub-family C, member 7)	CDC42BPA	CDC42 binding protein kinase alpha (DMPK-like)	SMAD1	SMAD family member 1	C2CD2	C2 calcium-dependent domain containing 2	XKR6	XK, Kell blood group complex subunit-related family, member 6	C3orf70	chromosome 3 open reading frame 70	AFF2	AF4/FMR2 family, member 2
RASGEF1A	RasGEF domain family, member 1A	DUSP19	dual specificity phosphatase 19	FAM178A	family with sequence similarity 178, member A			LENG1	leukocyte receptor cluster (LRC) member 1	MBNL1	muscleblind-like (Drosophila)	SCN3A	sodium channel, voltage-gated, type III, alpha subunit	RPS6KA2	ribosomal protein S6 kinase, 90kDa, polypeptide 2	2010-09-02	septin 2	MED1	mediator complex subunit 1	CACNB4	calcium channel, voltage-dependent, beta 4 subunit	C9orf40	chromosome 9 open reading frame 40	SLC25A25	solute carrier family 25 (mitochondrial carrier; phosphate carrier), member 25	TTLL2	tubulin tyrosine ligase-like family, member 2	DUSP19	dual specificity phosphatase 19	RFX4	regulatory factor X, 4 (influences HLA class II expression)
A2BP1	ataxin 2-binding protein 1	UBE2J1	ubiquitin-conjugating enzyme E2, J1 (UBC6 homolog, yeast)	ONECUT2	one cut homeobox 2			HOXB3	homeobox B3	HOXA10	homeobox A10	SLC6A3	solute carrier family 6 (neurotransmitter transporter, dopamine), member 3	SYT6	synaptotagmin VI	FGF8	fibroblast growth factor 8 (androgen-induced)	NAV1	neuron navigator 1	ATXN10	ataxin 10	AGPAT5	1-acylglycerol-3-phosphate O-acyltransferase 5 (lysophosphatidic acid acyltransferase, epsilon)	EIF5	eukaryotic translation initiation factor 5	SKP1	S-phase kinase-associated protein 1	UBE2J1	ubiquitin-conjugating enzyme E2, J1 (UBC6 homolog, yeast)	FBXO11	F-box protein 11
		KDSR	3-ketodihydrosphingosine reductase	MAPK6	mitogen-activated protein kinase 6			BDNF	brain-derived neurotrophic factor	JMJD2B	jumonji domain containing 2B	C9orf72	chromosome 9 open reading frame 72	RCOR3	REST corepressor 3	ZCCHC3	zinc finger, CCHC domain containing 3	RBM17	RNA binding motif protein 17	C9orf58	chromosome 9 open reading frame 58	UBE2G1	ubiquitin-conjugating enzyme E2G 1 (UBC7 homolog, yeast)	MAGI3	membrane associated guanylate kinase, WW and PDZ domain containing 3	TPRG1	tumor protein p63 regulated 1	KDSR	3-ketodihydrosphingosine reductase	ERBB4	v-erb-a erythroblastic leukemia viral oncogene homolog 4 (avian)
		ST8SIA1	ST8 alpha-N-acetyl-neuraminide alpha-2,8-sialyltransferase 1	LOC285636	UPF0600 protein			STK39	serine threonine kinase 39 (STE20/SPS1 homolog, yeast)	CALM1	calmodulin 1 (phosphorylase kinase, delta)	FAM81A	family with sequence similarity 81, member A	CACNA1C	calcium channel, voltage-dependent, L type, alpha 1C subunit	MKL2	MKL/myocardin-like 2	HBS1L	HBS1-like (S. cerevisiae)	SLC31A1	solute carrier family 31 (copper transporters), member 1	ANKS1B	ankyrin repeat and sterile alpha motif domain containing 1B	C20orf177	chromosome 20 open reading frame 177	TMCC1	transmembrane and coiled-coil domain family 1	ST8SIA1	ST8 alpha-N-acetyl-neuraminide alpha-2,8-sialyltransferase 1	C18orf1	chromosome 18 open reading frame 1
		STYX	serine/threonine/tyrosine interacting protein	BRF2	BRF2, subunit of RNA polymerase III transcription initiation factor, BRF1-like			NUP43	nucleoporin 43kDa	CCDC6	coiled-coil domain containing 6	CDC7	cell division cycle 7 homolog (S. cerevisiae)	EXOC5	exocyst complex component 5	USO1	USO1 homolog, vesicle docking protein (yeast)	MMD	monocyte to macrophage differentiation-associated	UNC13C	unc-13 homolog C (C. elegans)	CCNL2	cyclin L2	GRB2	growth factor receptor-bound protein 2	COX4NB	COX4 neighbor	STYX	serine/threonine/tyrosine interacting protein	DNAJA2	DnaJ (Hsp40) homolog, subfamily A, member 2
		ETS1	v-ets erythroblastosis virus E26 oncogene homolog 1 (avian)	CEP110	centrosomal protein 110kDa			KLF3	Kruppel-like factor 3 (basic)	FOXJ3	forkhead box J3	SNX18	sorting nexin 18	SGK1	serum/glucocorticoid regulated kinase 1	MEX3B	mex-3 homolog B (C. elegans)	IMPAD1	inositol monophosphatase domain containing 1	GABBR1	gamma-aminobutyric acid (GABA) B receptor, 1	MTM1	myotubularin 1	PAX9	paired box 9	DAG1	dystroglycan 1 (dystrophin-associated glycoprotein 1)	ETS1	v-ets erythroblastosis virus E26 oncogene homolog 1 (avian)	CREBZF	CREB/ATF bZIP transcription factor
		IRF2	interferon regulatory factor 2	HIC2	hypermethylated in cancer 2			MED13L	mediator complex subunit 13-like	MBD5	methyl-CpG binding domain protein 5	CHD1	chromodomain helicase DNA binding protein 1	SLC26A4	solute carrier family 26, member 4	EFR3A	EFR3 homolog A (S. cerevisiae)	TMPO	thymopoietin	UBE2G1	ubiquitin-conjugating enzyme E2G 1 (UBC7 homolog, yeast)	ATF2	activating transcription factor 2	AQP11	aquaporin 11	TEAD1	TEA domain family member 1 (SV40 transcriptional enhancer factor)	IRF2	interferon regulatory factor 2	KSR2	kinase suppressor of ras 2
		ATAD2B	ATPase family, AAA domain containing 2B	DTX2	deltex homolog 2 (Drosophila)			AUTS2	autism susceptibility candidate 2	ZNF236	zinc finger protein 236	FOXG1	forkhead box G1	ZNF217	zinc finger protein 217	RCOR1	REST corepressor 1	BRWD1	bromodomain and WD repeat domain containing 1	XPR1	xenotropic and polytropic retrovirus receptor	ZDHHC6	zinc finger, DHHC-type containing 6	PPARG	peroxisome proliferator-activated receptor gamma	RABEP1	rabaptin, RAB GTPase binding effector protein 1	ATAD2B	ATPase family, AAA domain containing 2B	SLC35F1	solute carrier family 35, member F1
		DCUN1D4	DCN1, defective in cullin neddylation 1, domain containing 4 (S. cerevisiae)	MAP3K1	mitogen-activated protein kinase kinase kinase 1			FOXO3	forkhead box O3	PRDM10	PR domain containing 10	LMBR1L	limb region 1 homolog (mouse)-like	PTPRD	protein tyrosine phosphatase, receptor type, D	RAB6IP1	RAB6 interacting protein 1	FBXO22	F-box protein 22	ADCY2	adenylate cyclase 2 (brain)	MGAT4A	mannosyl (alpha-1,3-)-glycoprotein beta-1,4-N-acetylglucosaminyltransferase, isozyme A	C10orf137	chromosome 10 open reading frame 137	MAPRE1	microtubule-associated protein, RP/EB family, member 1	DCUN1D4	DCN1, defective in cullin neddylation 1, domain containing 4 (S. cerevisiae)	OPCML	opioid binding protein/cell adhesion molecule-like
		C12orf30	chromosome 12 open reading frame 30	ZNF200	zinc finger protein 200			RARB	retinoic acid receptor, beta	BCL9	B-cell CLL/lymphoma 9	FNDC3A	fibronectin type III domain containing 3A	RGL1	ral guanine nucleotide dissociation stimulator-like 1	BNC2	basonuclin 2	SH3TC2	SH3 domain and tetratricopeptide repeats 2	SPRYD4	SPRY domain containing 4	TRPC3	transient receptor potential cation channel, subfamily C, member 3	CDS1	CDP-diacylglycerol synthase (phosphatidate cytidylyltransferase) 1	ERBB4	v-erb-a erythroblastic leukemia viral oncogene homolog 4 (avian)	C12orf30	chromosome 12 open reading frame 30	PSD4	pleckstrin and Sec7 domain containing 4
		ERBB4	v-erb-a erythroblastic leukemia viral oncogene homolog 4 (avian)	CPEB2	cytoplasmic polyadenylation element binding protein 2			MYO1E	myosin IE	WWC3	WWC family member 3	ZCCHC2	zinc finger, CCHC domain containing 2	CHD2	chromodomain helicase DNA binding protein 2	TGFBR1	transforming growth factor, beta receptor I (activin A receptor type II-like kinase, 53kDa)	CLIP1	CAP-GLY domain containing linker protein 1	XDH	xanthine dehydrogenase	DEPDC1	DEP domain containing 1	EYA1	eyes absent homolog 1 (Drosophila)	KCNIP1	Kv channel interacting protein 1	ERBB4	v-erb-a erythroblastic leukemia viral oncogene homolog 4 (avian)	ESR1	estrogen receptor 1
		FOXN2	forkhead box N2	PBX3	pre-B-cell leukemia homeobox 3			FEM1C	fem-1 homolog c (C. elegans)	AMMECR1	Alport syndrome, mental retardation, midface hypoplasia and elliptocytosis chromosomal region, gene 1	BDP1	B double prime 1, subunit of RNA polymerase III transcription initiation factor IIIB	SGEF	Src homology 3 domain-containing guanine nucleotide exchange factor	TMEM55A	transmembrane protein 55A	DNAJC5	DnaJ (Hsp40) homolog, subfamily C, member 5	ELAVL1	ELAV (embryonic lethal, abnormal vision, Drosophila)-like 1 (Hu antigen R)	CDK6	cyclin-dependent kinase 6	GABRP	gamma-aminobutyric acid (GABA) A receptor, pi	FBXW2	F-box and WD repeat domain containing 2	FOXN2	forkhead box N2	MECP2	methyl CpG binding protein 2 (Rett syndrome)
		MBD2	methyl-CpG binding domain protein 2	CLDN12	claudin 12			UNC84A	unc-84 homolog A (C. elegans)	SIRT1	sirtuin (silent mating type information regulation 2 homolog) 1 (S. cerevisiae)	UCP3	uncoupling protein 3 (mitochondrial, proton carrier)	RIN2	Ras and Rab interactor 2	RMI1	RMI1, RecQ mediated genome instability 1, homolog (S. cerevisiae)	SORBS1	sorbin and SH3 domain containing 1	ARFIP2	ADP-ribosylation factor interacting protein 2 (arfaptin 2)	USP15	ubiquitin specific peptidase 15	GRIN2D	glutamate receptor, ionotropic, N-methyl D-aspartate 2D	C3orf59	chromosome 3 open reading frame 59	MBD2	methyl-CpG binding domain protein 2	ATXN7L3	ataxin 7-like 3
		BCL2L11	BCL2-like 11 (apoptosis facilitator)	WIPI2	WD repeat domain, phosphoinositide interacting 2			SMC5	structural maintenance of chromosomes 5	TMEM170B	transmembrane protein 170B	FAM133A	family with sequence similarity 133, member A	MOBKL1A	MOB1, Mps One Binder kinase activator-like 1A (yeast)	LMO4	LIM domain only 4	ZDHHC7	zinc finger, DHHC-type containing 7	AP2M1	adaptor-related protein complex 2, mu 1 subunit	SC4MOL	sterol-C4-methyl oxidase-like	MMD	monocyte to macrophage differentiation-associated	DSTN	destrin (actin depolymerizing factor)	BCL2L11	BCL2-like 11 (apoptosis facilitator)	ZXDC	ZXD family zinc finger C
		ARNT	aryl hydrocarbon receptor nuclear translocator	CPA4	carboxypeptidase A4			SLC6A1	solute carrier family 6 (neurotransmitter transporter, GABA), member 1	MAGI3	membrane associated guanylate kinase, WW and PDZ domain containing 3	RARG	retinoic acid receptor, gamma	KIAA1632	KIAA1632	COL19A1	collagen, type XIX, alpha 1	UBE2D2	ubiquitin-conjugating enzyme E2D 2 (UBC4/5 homolog, yeast)	AMMECR1L	AMME chromosomal region gene 1-like	GMFB	glia maturation factor, beta	CD28	CD28 molecule	MTF2	metal response element binding transcription factor 2	ARNT	aryl hydrocarbon receptor nuclear translocator
		MEGF9	multiple EGF-like-domains 9	DDX19A	DEAD (Asp-Glu-Ala-As) box polypeptide 19A			ZAK	sterile alpha motif and leucine zipper containing kinase AZK	PCDH17	protocadherin 17	ZBTB11	zinc finger and BTB domain containing 11	CNOT6L	CCR4-NOT transcription complex, subunit 6-like	MRPL50	mitochondrial ribosomal protein L50	NMT2	N-myristoyltransferase 2	PDYN	prodynorphin	UBR1	ubiquitin protein ligase E3 component n-recognin 1	PALM2	paralemmin 2	CNTD1	cyclin N-terminal domain containing 1	MEGF9	multiple EGF-like-domains 9
		YWHAG	tyrosine 3-monooxygenase/tryptophan 5-monooxygenase activation protein, gamma polypeptide	DDX19B	DEAD (Asp-Glu-Ala-As) box polypeptide 19B			PPM1F	protein phosphatase 1F (PP2C domain containing)	CDC42BPA	CDC42 binding protein kinase alpha (DMPK-like)	TLL2	tolloid-like 2	CAST	calpastatin	LRP1B	low density lipoprotein-related protein 1B (deleted in tumors)	C7orf41	chromosome 7 open reading frame 41	SLC2A1	solute carrier family 2 (facilitated glucose transporter), member 1	PFKFB3	6-phosphofructo-2-kinase/fructose-2,6-biphosphatase 3	MIER3	mesoderm induction early response 1, family member 3	QKI	quaking homolog, KH domain RNA binding (mouse)	YWHAG	tyrosine 3-monooxygenase/tryptophan 5-monooxygenase activation protein, gamma polypeptide
		PIK3R1	phosphoinositide-3-kinase, regulatory subunit 1 (alpha)	ARHGAP28	Rho GTPase activating protein 28			ZFX	zinc finger protein, X-linked	CTTN	cortactin	KSR1	kinase suppressor of ras 1	TNRC6B	trinucleotide repeat containing 6B	MEX3D	mex-3 homolog D (C. elegans)	ARL10	ADP-ribosylation factor-like 10	SFRS2	splicing factor, arginine/serine-rich 2	NUP50	nucleoporin 50kDa	STYK1	serine/threonine/tyrosine kinase 1	PPP1R10	protein phosphatase 1, regulatory (inhibitor) subunit 10	PIK3R1	phosphoinositide-3-kinase, regulatory subunit 1 (alpha)
		BMF	Bcl2 modifying factor	ZFYVE26	zinc finger, FYVE domain containing 26			C14orf43	chromosome 14 open reading frame 43	ATP2B1	ATPase, Ca++ transporting, plasma membrane 1	LIFR	leukemia inhibitory factor receptor alpha	RP6-213H19.1	serine/threonine protein kinase MST4	KIAA1549	KIAA1549	CREB1	cAMP responsive element binding protein 1	CTDSP2	CTD (carboxy-terminal domain, RNA polymerase II, polypeptide A) small phosphatase 2	PAWR	PRKC, apoptosis, WT1, regulator	SEMA6A	sema domain, transmembrane domain (TM), and cytoplasmic domain, (semaphorin) 6A	BZW1	basic leucine zipper and W2 domains 1	BMF	Bcl2 modifying factor
		ESR1	estrogen receptor 1	CEP135	centrosomal protein 135kDa			SOCS4	suppressor of cytokine signaling 4	PPP2R5C	protein phosphatase 2, regulatory subunit B', gamma isoform	FLJ20309	hypothetical protein FLJ20309	RICTOR	rapamycin-insensitive companion of mTOR	USP31	ubiquitin specific peptidase 31	CLTC	clathrin, heavy chain (Hc)	KIAA0182	KIAA0182	RPS6KA6	ribosomal protein S6 kinase, 90kDa, polypeptide 6	HRB	HIV-1 Rev binding protein	ZNF148	zinc finger protein 148	ESR1	estrogen receptor 1
		ANGPTL2	angiopoietin-like 2	CDC34	cell division cycle 34 homolog (S. cerevisiae)			PRDM8	PR domain containing 8	ZFX	zinc finger protein, X-linked	WDR82	WD repeat domain 82	WDR45L	WDR45-like	CPEB3	cytoplasmic polyadenylation element binding protein 3	TET3	tet oncogene family member 3	JARID1A	jumonji, AT rich interactive domain 1A	UBR3	ubiquitin protein ligase E3 component n-recognin 3 (putative)	RCBTB1	regulator of chromosome condensation (RCC1) and BTB (POZ) domain containing protein 1	IGF2BP2	insulin-like growth factor 2 mRNA binding protein 2	ANGPTL2	angiopoietin-like 2
		CUX2	cut-like homeobox 2	ACSL6	acyl-CoA synthetase long-chain family member 6			RUNX2	runt-related transcription factor 2	BICD2	bicaudal D homolog 2 (Drosophila)	AFF3	AF4/FMR2 family, member 3	TUB	tubby homolog (mouse)	AMFR	autocrine motility factor receptor	HOXA1	homeobox A1	N4BP3	Nedd4 binding protein 3	LOXL2	lysyl oxidase-like 2	PDE7B	phosphodiesterase 7B	VEGFA	vascular endothelial growth factor A	CUX2	cut-like homeobox 2
		ZFYVE16	zinc finger, FYVE domain containing 16	FRMD4B	FERM domain containing 4B			GPATCH8	G patch domain containing 8	EPAS1	endothelial PAS domain protein 1	ZNF518A	zinc finger protein 518A	NAALADL2	N-acetylated alpha-linked acidic dipeptidase-like 2	RNMT	RNA (guanine-7-) methyltransferase	RALB	v-ral simian leukemia viral oncogene homolog B (ras related; GTP binding protein)	FAM91A1	family with sequence similarity 91, member A1	CILP	cartilage intermediate layer protein, nucleotide pyrophosphohydrolase	EDEM3	ER degradation enhancer, mannosidase alpha-like 3	ZBTB38	zinc finger and BTB domain containing 38	ZFYVE16	zinc finger, FYVE domain containing 16
		ROD1	ROD1 regulator of differentiation 1 (S. pombe)	DVL3	dishevelled, dsh homolog 3 (Drosophila)			NCKAP1	NCK-associated protein 1	GRPEL2	GrpE-like 2, mitochondrial (E. coli)	PIGA	phosphatidylinositol glycan anchor biosynthesis, class A (paroxysmal nocturnal hemoglobinuria)	MECP2	methyl CpG binding protein 2 (Rett syndrome)	CTTN	cortactin	AZIN1	antizyme inhibitor 1	PGAP1	post-GPI attachment to proteins 1	BID	BH3 interacting domain death agonist	OBFC2A	oligonucleotide/oligosaccharide-binding fold containing 2A	RNF138	ring finger protein 138	ROD1	ROD1 regulator of differentiation 1 (S. pombe)
		LOC26010	viral DNA polymerase-transactivated protein 6	POLR2D	polymerase (RNA) II (DNA directed) polypeptide D			C5orf23	chromosome 5 open reading frame 23	FANCM	Fanconi anemia, complementation group M	ASB3	ankyrin repeat and SOCS box-containing 3	PLXNA4	plexin A4	UBE2D1	ubiquitin-conjugating enzyme E2D 1 (UBC4/5 homolog, yeast)	TXNDC10	thioredoxin domain containing 10	SLC2A13	solute carrier family 2 (facilitated glucose transporter), member 13	MTX2	metaxin 2	PLEKHH1	pleckstrin homology domain containing, family H (with MyTH4 domain) member 1	LIN7C	lin-7 homolog C (C. elegans)	LOC26010	viral DNA polymerase-transactivated protein 6
		GNAI3	guanine nucleotide binding protein (G protein), alpha inhibiting activity polypeptide 3	KIAA1305	KIAA1305			DLX6	distal-less homeobox 6	ENAH	enabled homolog (Drosophila)	CCDC97	coiled-coil domain containing 97	MON2	MON2 homolog (S. cerevisiae)	DDX3X	DEAD (Asp-Glu-Ala-Asp) box polypeptide 3, X-linked	ST8SIA3	ST8 alpha-N-acetyl-neuraminide alpha-2,8-sialyltransferase 3	PRDM12	PR domain containing 12	ATPAF1	ATP synthase mitochondrial F1 complex assembly factor 1	TSC1	tuberous sclerosis 1	PCTK2	PCTAIRE protein kinase 2	GNAI3	guanine nucleotide binding protein (G protein), alpha inhibiting activity polypeptide 3
		TRPC3	transient receptor potential cation channel, subfamily C, member 3	APBB3	amyloid beta (A4) precursor protein-binding, family B, member 3			ANKRD13C	ankyrin repeat domain 13C	NR5A2	nuclear receptor subfamily 5, group A, member 2	SEC23A	Sec23 homolog A (S. cerevisiae)	TNFAIP3	tumor necrosis factor, alpha-induced protein 3	TET2	tet oncogene family member 2	WAPAL	wings apart-like homolog (Drosophila)	COL5A1	collagen, type V, alpha 1	DNAJC21	DnaJ (Hsp40) homolog, subfamily C, member 21	RBBP5	retinoblastoma binding protein 5	PRPF4B	PRP4 pre-mRNA processing factor 4 homolog B (yeast)	TRPC3	transient receptor potential cation channel, subfamily C, member 3
		EIF3J	eukaryotic translation initiation factor 3, subunit J	C9orf40	chromosome 9 open reading frame 40			FAM120A	family with sequence similarity 120A	CA2	carbonic anhydrase II	PHTF2	putative homeodomain transcription factor 2	GATAD2B	GATA zinc finger domain containing 2B	PTGER3	prostaglandin E receptor 3 (subtype EP3)	TIPRL	TIP41, TOR signaling pathway regulator-like (S. cerevisiae)	CRISPLD1	cysteine-rich secretory protein LCCL domain containing 1	MAPK6	mitogen-activated protein kinase 6	SFRP1	secreted frizzled-related protein 1	FLJ37543	hypothetical protein FLJ37543	EIF3J	eukaryotic translation initiation factor 3, subunit J
		ATXN1	ataxin 1	IGF2BP3	insulin-like growth factor 2 mRNA binding protein 3			MBNL2	muscleblind-like 2 (Drosophila)	FERMT2	fermitin family homolog 2 (Drosophila)	RAVER2	ribonucleoprotein, PTB-binding 2	ATP6V1B2	ATPase, H+ transporting, lysosomal 56/58kDa, V1 subunit B2	IPPK	inositol 1,3,4,5,6-pentakisphosphate 2-kinase	GPATCH8	G patch domain containing 8	SMEK2	SMEK homolog 2, suppressor of mek1 (Dictyostelium)	RAB21	RAB21, member RAS oncogene family	WSB1	WD repeat and SOCS box-containing 1	STC1	stanniocalcin 1	ATXN1	ataxin 1
		HIPK1	homeodomain interacting protein kinase 1	PRPF38B	PRP38 pre-mRNA processing factor 38 (yeast) domain containing B			NFIB	nuclear factor I/B	CNR1	cannabinoid receptor 1 (brain)	ZNF711	zinc finger protein 711	RNF145	ring finger protein 145	ARHGAP19	Rho GTPase activating protein 19	UBR1	ubiquitin protein ligase E3 component n-recognin 1	AZIN1	antizyme inhibitor 1	CTNND2	catenin (cadherin-associated protein), delta 2 (neural plakophilin-related arm-repeat protein)	C5orf41	chromosome 5 open reading frame 41	TCF20	transcription factor 20 (AR1)	HIPK1	homeodomain interacting protein kinase 1
		THBS1	thrombospondin 1	CASP3	caspase 3, apoptosis-related cysteine peptidase			MTMR6	myotubularin related protein 6	RBM33	RNA binding motif protein 33	BCL11B	B-cell CLL/lymphoma 11B (zinc finger protein)	CCNL1	cyclin L1	TGIF2	TGFB-induced factor homeobox 2	MSL2L1	male-specific lethal 2-like 1 (Drosophila)	GCLC	glutamate-cysteine ligase, catalytic subunit	ADAM9	ADAM metallopeptidase domain 9 (meltrin gamma)	FBXO10	F-box protein 10	ST3GAL2	ST3 beta-galactoside alpha-2,3-sialyltransferase 2	THBS1	thrombospondin 1
		SHANK2	SH3 and multiple ankyrin repeat domains 2	TMEM2	transmembrane protein 2			DDX6	DEAD (Asp-Glu-Ala-Asp) box polypeptide 6	PCNX	pecanex homolog (Drosophila)	EPDR1	ependymin related protein 1 (zebrafish)	KLF10	Kruppel-like factor 10	RBBP6	retinoblastoma binding protein 6	GIGYF2	GRB10 interacting GYF protein 2	TNKS2	tankyrase, TRF1-interacting ankyrin-related ADP-ribose polymerase 2	MAP7	microtubule-associated protein 7	HOXA13	homeobox A13	PHF21A	PHD finger protein 21A	SHANK2	SH3 and multiple ankyrin repeat domains 2
		RECK	reversion-inducing-cysteine-rich protein with kazal motifs	PARD6B	par-6 partitioning defective 6 homolog beta (C. elegans)			HMGB1	high-mobility group box 1	PSD3	pleckstrin and Sec7 domain containing 3	B4GALT6	UDP-Gal:betaGlcNAc beta 1,4- galactosyltransferase, polypeptide 6	ZDHHC7	zinc finger, DHHC-type containing 7	C9orf97	chromosome 9 open reading frame 97	TRIP12	thyroid hormone receptor interactor 12	EPC2	enhancer of polycomb homolog 2 (Drosophila)	GNPNAT1	glucosamine-phosphate N-acetyltransferase 1	GORASP1	golgi reassembly stacking protein 1, 65kDa	BMI1	BMI1 polycomb ring finger oncogene	RECK	reversion-inducing-cysteine-rich protein with kazal motifs
		MSL2L1	male-specific lethal 2-like 1 (Drosophila)	SEMA4F	sema domain, immunoglobulin domain (Ig), transmembrane domain (TM) and short cytoplasmic domain, (semaphorin) 4F			FGFR1	fibroblast growth factor receptor 1 (fms-related tyrosine kinase 2, Pfeiffer syndrome)	PAIP2	poly(A) binding protein interacting protein 2	FLVCR2	feline leukemia virus subgroup C cellular receptor family, member 2	ITGA2	integrin, alpha 2 (CD49B, alpha 2 subunit of VLA-2 receptor)	PTMA	prothymosin, alpha	ABCC9	ATP-binding cassette, sub-family C (CFTR/MRP), member 9	TMPRSS2	transmembrane protease, serine 2	GPR52	G protein-coupled receptor 52	LOC402665	hCG1651476	TMEM32	transmembrane protein 32	MSL2L1	male-specific lethal 2-like 1 (Drosophila)
		AKAP13	A kinase (PRKA) anchor protein 13	CD200R1	CD200 receptor 1			ADAMTS1	ADAM metallopeptidase with thrombospondin type 1 motif, 1	LDB2	LIM domain binding 2	ARL4A	ADP-ribosylation factor-like 4A	C6orf222	chromosome 6 open reading frame 222	CCDC25	coiled-coil domain containing 25	CCAR1	cell division cycle and apoptosis regulator 1	MAP3K1	mitogen-activated protein kinase kinase kinase 1	CHFR	checkpoint with forkhead and ring finger domains	ATP6V1A	ATPase, H+ transporting, lysosomal 70kDa, V1 subunit A	PDE4D	phosphodiesterase 4D, cAMP-specific (phosphodiesterase E3 dunce homolog, Drosophila)	AKAP13	A kinase (PRKA) anchor protein 13
		HNRNPA3	heterogeneous nuclear ribonucleoprotein A3	KLHL31	kelch-like 31 (Drosophila)			C18orf62	chromosome 18 open reading frame 62	FZD7	frizzled homolog 7 (Drosophila)	UBE2V2	ubiquitin-conjugating enzyme E2 variant 2	DDX3Y	DEAD (Asp-Glu-Ala-Asp) box polypeptide 3, Y-linked	COPS2	COP9 constitutive photomorphogenic homolog subunit 2 (Arabidopsis)	PAPD5	PAP associated domain containing 5	SLC44A1	solute carrier family 44, member 1	JAG1	jagged 1 (Alagille syndrome)	RBJ	rab and DnaJ domain containing	IRS2	insulin receptor substrate 2	HNRNPA3	heterogeneous nuclear ribonucleoprotein A3
		MLL	myeloid/lymphoid or mixed-lineage leukemia (trithorax homolog, Drosophila)	IGF2BP2	insulin-like growth factor 2 mRNA binding protein 2			MAML3	mastermind-like 3 (Drosophila)	TBC1D12	TBC1 domain family, member 12	STX2	syntaxin 2	SOX6	SRY (sex determining region Y)-box 6	GALNT13	UDP-N-acetyl-alpha-D-galactosamine:polypeptide N-acetylgalactosaminyltransferase 13 (GalNAc-T13)	TMED5	transmembrane emp24 protein transport domain containing 5	ZBTB41	zinc finger and BTB domain containing 41	WDR33	WD repeat domain 33	NOVA1	neuro-oncological ventral antigen 1	SLC23A2	solute carrier family 23 (nucleobase transporters), member 2	MLL	myeloid/lymphoid or mixed-lineage leukemia (trithorax homolog, Drosophila)
		TRAM2	translocation associated membrane protein 2	UTRN	utrophin			SH2D4B	SH2 domain containing 4B	SPRY4	sprouty homolog 4 (Drosophila)	RFXDC2	regulatory factor X domain containing 2	ATP10A	ATPase, class V, type 10A	DDX3Y	DEAD (Asp-Glu-Ala-Asp) box polypeptide 3, Y-linked	TEF	thyrotrophic embryonic factor	TET3	tet oncogene family member 3	TMEM184B	transmembrane protein 184B	ITSN2	intersectin 2	CRKL	v-crk sarcoma virus CT10 oncogene homolog (avian)-like	TRAM2	translocation associated membrane protein 2
		PLCXD3	phosphatidylinositol-specific phospholipase C, X domain containing 3	NAT12	N-acetyltransferase 12			FLRT3	fibronectin leucine rich transmembrane protein 3	CASC4	cancer susceptibility candidate 4	KIAA1576	KIAA1576 protein	TGIF1	TGFB-induced factor homeobox 1	DDX42	DEAD (Asp-Glu-Ala-Asp) box polypeptide 42	YTHDF3	YTH domain family, member 3	NAP1L1	nucleosome assembly protein 1-like 1	TOB1	transducer of ERBB2, 1	PDK4	pyruvate dehydrogenase kinase, isozyme 4	MXD1	MAX dimerization protein 1	PLCXD3	phosphatidylinositol-specific phospholipase C, X domain containing 3
		OLA1	Obg-like ATPase 1	TBKBP1	TBK1 binding protein 1			AMOT	angiomotin	DAAM2	dishevelled associated activator of morphogenesis 2	IHPK3	inositol hexaphosphate kinase 3	WDR20	WD repeat domain 20	UBTD2	ubiquitin domain containing 2	NOTCH1	Notch homolog 1, translocation-associated (Drosophila)	HNF4G	hepatocyte nuclear factor 4, gamma	GMDS	GDP-mannose 4,6-dehydratase	ADORA2B	adenosine A2b receptor	PSCD3	pleckstrin homology, Sec7 and coiled-coil domains 3	OLA1	Obg-like ATPase 1
		MIDN	midnolin	CDC25A	cell division cycle 25 homolog A (S. pombe)			CA13	carbonic anhydrase XIII	CUL2	cullin 2	EXTL2	exostoses (multiple)-like 2	NAV3	neuron navigator 3	FBLN2	fibulin 2	UST	uronyl-2-sulfotransferase	PTPRJ	protein tyrosine phosphatase, receptor type, J	KCNJ2	potassium inwardly-rectifying channel, subfamily J, member 2	ZHX1	zinc fingers and homeoboxes 1	NFAT5	nuclear factor of activated T-cells 5, tonicity-responsive	MIDN	midnolin
		SLC40A1	solute carrier family 40 (iron-regulated transporter), member 1	USP38	ubiquitin specific peptidase 38			MYST4	MYST histone acetyltransferase (monocytic leukemia) 4	SYT1	synaptotagmin I	NFIB	nuclear factor I/B	PACS1	phosphofurin acidic cluster sorting protein 1	FIGNL2	fidgetin-like 2	LSM5	LSM5 homolog, U6 small nuclear RNA associated (S. cerevisiae)	MAEA	macrophage erythroblast attacher	C12orf35	chromosome 12 open reading frame 35	KTELC1	KTEL (Lys-Tyr-Glu-Leu) containing 1	OAZ2	ornithine decarboxylase antizyme 2	SLC40A1	solute carrier family 40 (iron-regulated transporter), member 1
		APAF1	apoptotic peptidase activating factor 1	GEMIN7	gem (nuclear organelle) associated protein 7			C5orf13	chromosome 5 open reading frame 13	ARIH1	ariadne homolog, ubiquitin-conjugating enzyme E2 binding protein, 1 (Drosophila)	DLGAP2	discs, large (Drosophila) homolog-associated protein 2	PI15	peptidase inhibitor 15	ONECUT2	one cut homeobox 2	WDR45L	WDR45-like	CCNJ	cyclin J	STRBP	spermatid perinuclear RNA binding protein	FAM133B	family with sequence similarity 133, member B	IREB2	iron-responsive element binding protein 2	APAF1	apoptotic peptidase activating factor 1
		RSBN1L	round spermatid basic protein 1-like	PDPR	pyruvate dehydrogenase phosphatase regulatory subunit			HRB	HIV-1 Rev binding protein	AP1B1	adaptor-related protein complex 1, beta 1 subunit	NRIP1	nuclear receptor interacting protein 1	ETV5	ets variant gene 5 (ets-related molecule)	UQCC	ubiquinol-cytochrome c reductase complex chaperone, CBP3 homolog (yeast)	LSM14A	LSM14A, SCD6 homolog A (S. cerevisiae)	MLL5	myeloid/lymphoid or mixed-lineage leukemia 5 (trithorax homolog, Drosophila)	MYLK3	myosin light chain kinase 3	C1orf9	chromosome 1 open reading frame 9	C2orf24	chromosome 2 open reading frame 24	RSBN1L	round spermatid basic protein 1-like
		FMR1	fragile X mental retardation 1	CDV3	CDV3 homolog (mouse)			PTCH1	patched homolog 1 (Drosophila)	PI4K2B	phosphatidylinositol 4-kinase type 2 beta	CENTB2	centaurin, beta 2	SLC9A6	solute carrier family 9 (sodium/hydrogen exchanger), member 6	GRSF1	G-rich RNA sequence binding factor 1	CLINT1	clathrin interactor 1	PARD6B	par-6 partitioning defective 6 homolog beta (C. elegans)	ATAD2B	ATPase family, AAA domain containing 2B	CCNK	cyclin K	TFAP2B	transcription factor AP-2 beta (activating enhancer binding protein 2 beta)	FMR1	fragile X mental retardation 1
		TOX	thymocyte selection-associated high mobility group box	CCL7	chemokine (C-C motif) ligand 7			TMEM127	transmembrane protein 127	PHACTR4	phosphatase and actin regulator 4	PALM2	paralemmin 2	CLOCK	clock homolog (mouse)	WASL	Wiskott-Aldrich syndrome-like	SKP1	S-phase kinase-associated protein 1	ADAMTS5	ADAM metallopeptidase with thrombospondin type 1 motif, 5 (aggrecanase-2)	SLC12A2	solute carrier family 12 (sodium/potassium/chloride transporters), member 2	PLCL2	phospholipase C-like 2	MYT1L	myelin transcription factor 1-like	TOX	thymocyte selection-associated high mobility group box
		ZNF385A	zinc finger protein 385A	IGSF1	immunoglobulin superfamily, member 1			TIFAB	TRAF-interacting protein with forkhead-associated domain, family member B	GTPBP2	GTP binding protein 2	USP22	ubiquitin specific peptidase 22	ABCA1	ATP-binding cassette, sub-family A (ABC1), member 1	PRPF4B	PRP4 pre-mRNA processing factor 4 homolog B (yeast)	SUPT7L	suppressor of Ty 7 (S. cerevisiae)-like	TCF4	transcription factor 4	TSPYL4	TSPY-like 4	FLJ10404	hypothetical protein FLJ10404	IGF1R	insulin-like growth factor 1 receptor	ZNF385A	zinc finger protein 385A
		ARID1A	AT rich interactive domain 1A (SWI-like)	DDI2	DDI1, DNA-damage inducible 1, homolog 2 (S. cerevisiae)			EIF2AK4	eukaryotic translation initiation factor 2 alpha kinase 4	ZFAND5	zinc finger, AN1-type domain 5	MYH11	myosin, heavy chain 11, smooth muscle	IMPDH1	IMP (inosine monophosphate) dehydrogenase 1	ESRRA	estrogen-related receptor alpha	SMG5	Smg-5 homolog, nonsense mediated mRNA decay factor (C. elegans)	ATP2B1	ATPase, Ca++ transporting, plasma membrane 1	COMMD8	COMM domain containing 8	EPB41L4A	erythrocyte membrane protein band 4.1 like 4A	JHDM1D	jumonji C domain containing histone demethylase 1 homolog D (S. cerevisiae)	ARID1A	AT rich interactive domain 1A (SWI-like)
		SOCS3	suppressor of cytokine signaling 3	NHLRC3	NHL repeat containing 3			BCL11A	B-cell CLL/lymphoma 11A (zinc finger protein)	FLJ20309	hypothetical protein FLJ20309	SOX9	SRY (sex determining region Y)-box 9 (campomelic dysplasia, autosomal sex-reversal)	WDR44	WD repeat domain 44	ADAMTS5	ADAM metallopeptidase with thrombospondin type 1 motif, 5 (aggrecanase-2)	FGF7	fibroblast growth factor 7 (keratinocyte growth factor)	PRKAA1	protein kinase, AMP-activated, alpha 1 catalytic subunit	SRP19	signal recognition particle 19kDa	DNAJC13	DnaJ (Hsp40) homolog, subfamily C, member 13	RNF145	ring finger protein 145	SOCS3	suppressor of cytokine signaling 3
		RNF4	ring finger protein 4	PLEKHG7	pleckstrin homology domain containing, family G (with RhoGef domain) member 7			CA5B	carbonic anhydrase VB, mitochondrial	SPTBN1	spectrin, beta, non-erythrocytic 1	P15RS	cyclin-dependent kinase 2B-inhibitor-related protein	PDE5A	phosphodiesterase 5A, cGMP-specific	FAM8A1	family with sequence similarity 8, member A1	UBR5	ubiquitin protein ligase E3 component n-recognin 5	VANGL1	vang-like 1 (van gogh, Drosophila)	TMEM68	transmembrane protein 68	EIF5A2	eukaryotic translation initiation factor 5A2	THRB	thyroid hormone receptor, beta (erythroblastic leukemia viral (v-erb-a) oncogene homolog 2, avian)	RNF4	ring finger protein 4
		ZSWIM4	zinc finger, SWIM-type containing 4	ABL2	v-abl Abelson murine leukemia viral oncogene homolog 2 (arg, Abelson-related gene)			EBF1	early B-cell factor 1	SLIT2	slit homolog 2 (Drosophila)	CFL2	cofilin 2 (muscle)	ESR1	estrogen receptor 1	PDGFD	platelet derived growth factor D	DPY19L4	dpy-19-like 4 (C. elegans)	CPD	carboxypeptidase D	FAM98B	family with sequence similarity 98, member B	C2orf55	chromosome 2 open reading frame 55	PALM2	paralemmin 2	ZSWIM4	zinc finger, SWIM-type containing 4
		ICHTHYIN	ichthyin protein	EDN1	endothelin 1			ZFHX4	zinc finger homeobox 4	SLIT3	slit homolog 3 (Drosophila)	C4orf19	chromosome 4 open reading frame 19	MTMR6	myotubularin related protein 6	RFFL	ring finger and FYVE-like domain containing 1	ANKRD12	ankyrin repeat domain 12	BCL11B	B-cell CLL/lymphoma 11B (zinc finger protein)	ZNF148	zinc finger protein 148	CDH11	cadherin 11, type 2, OB-cadherin (osteoblast)	RGMB	RGM domain family, member B	ICHTHYIN	ichthyin protein
		SOX11	SRY (sex determining region Y)-box 11	FGD6	FYVE, RhoGEF and PH domain containing 6			ZNF652	zinc finger protein 652	SEC24A	SEC24 related gene family, member A (S. cerevisiae)	SLC35A5	solute carrier family 35, member A5	ZNF518A	zinc finger protein 518A	SSR1	signal sequence receptor, alpha (translocon-associated protein alpha)	CCDC82	coiled-coil domain containing 82	TULP4	tubby like protein 4	HELZ	helicase with zinc finger	TFPI	tissue factor pathway inhibitor (lipoprotein-associated coagulation inhibitor)	CUGBP2	CUG triplet repeat, RNA binding protein 2	SOX11	SRY (sex determining region Y)-box 11
		CD4	CD4 molecule	FAS	Fas (TNF receptor superfamily, member 6)			SNX9	sorting nexin 9	SYVN1	synovial apoptosis inhibitor 1, synoviolin	CMTM4	CKLF-like MARVEL transmembrane domain containing 4	TAF4	TAF4 RNA polymerase II, TATA box binding protein (TBP)-associated factor, 135kDa	CBL	Cas-Br-M (murine) ecotropic retroviral transforming sequence	HNRNPR	heterogeneous nuclear ribonucleoprotein R	INSIG2	insulin induced gene 2	MTFMT	mitochondrial methionyl-tRNA formyltransferase	FBXO45	F-box protein 45	FRMD4A	FERM domain containing 4A	CD4	CD4 molecule
		PCDHAC1	protocadherin alpha subfamily C, 1	PLEKHG6	pleckstrin homology domain containing, family G (with RhoGef domain) member 6			CHD3	chromodomain helicase DNA binding protein 3	LRRTM3	leucine rich repeat transmembrane neuronal 3	C14orf28	chromosome 14 open reading frame 28	PXDN	peroxidasin homolog (Drosophila)	FAM13A1	family with sequence similarity 13, member A1	RSBN1	round spermatid basic protein 1	FRMD6	FERM domain containing 6	RBM24	RNA binding motif protein 24	ZNF800	zinc finger protein 800	PDLIM5	PDZ and LIM domain 5	PCDHAC1	protocadherin alpha subfamily C, 1
		PCDHAC2	protocadherin alpha subfamily C, 2	C1orf91	chromosome 1 open reading frame 91			MYLIP	myosin regulatory light chain interacting protein	IRF6	interferon regulatory factor 6	SSX2IP	synovial sarcoma, X breakpoint 2 interacting protein	MIER1	mesoderm induction early response 1 homolog (Xenopus laevis)	MAP1B	microtubule-associated protein 1B	LRRC58	leucine rich repeat containing 58	SPAG9	sperm associated antigen 9	PITPNC1	phosphatidylinositol transfer protein, cytoplasmic 1	SLC35F1	solute carrier family 35, member F1	ST8SIA2	ST8 alpha-N-acetyl-neuraminide alpha-2,8-sialyltransferase 2	PCDHAC2	protocadherin alpha subfamily C, 2
		PCDHA1	protocadherin alpha 1	DMD	dystrophin (muscular dystrophy, Duchenne and Becker types)			RBM39	RNA binding motif protein 39	TOB1	transducer of ERBB2, 1	ADRA2A	adrenergic, alpha-2A-, receptor	CSPP1	centrosome and spindle pole associated protein 1	PCDH19	protocadherin 19	ERBB4	v-erb-a erythroblastic leukemia viral oncogene homolog 4 (avian)	DMD	dystrophin (muscular dystrophy, Duchenne and Becker types)	ERC2	ELKS/RAB6-interacting/CAST family member 2	CSRP2	cysteine and glycine-rich protein 2	PPP1R12B	protein phosphatase 1, regulatory (inhibitor) subunit 12B	PCDHA1	protocadherin alpha 1
		PCDHA10	protocadherin alpha 10	RRM2	ribonucleotide reductase M2 polypeptide			PAX6	paired box 6	QSER1	glutamine and serine rich 1	CACNB2	calcium channel, voltage-dependent, beta 2 subunit	KCNA4	potassium voltage-gated channel, shaker-related subfamily, member 4	CLTCL1	clathrin, heavy chain-like 1	RAD21	RAD21 homolog (S. pombe)	TES	testis derived transcript (3 LIM domains)	THRAP3	thyroid hormone receptor associated protein 3	NCOA7	nuclear receptor coactivator 7	HIPK2	homeodomain interacting protein kinase 2	PCDHA10	protocadherin alpha 10
		PCDHA11	protocadherin alpha 11	FRAS1	Fraser syndrome 1			RAB1A	RAB1A, member RAS oncogene family	LOC440093	histone H3-like	SETD5	SET domain containing 5	TNKS	tankyrase, TRF1-interacting ankyrin-related ADP-ribose polymerase	CAV1	caveolin 1, caveolae protein, 22kDa	GNPTAB	N-acetylglucosamine-1-phosphate transferase, alpha and beta subunits	FOXG1	forkhead box G1	ASPN	asporin	JMY	junction-mediating and regulatory protein	SYPL2	synaptophysin-like 2	PCDHA11	protocadherin alpha 11
		PCDHA12	protocadherin alpha 12	GCNT4	glucosaminyl (N-acetyl) transferase 4, core 2 (beta-1,6-N-acetylglucosaminyltransferase)			FOXP2	forkhead box P2	NUFIP2	nuclear fragile X mental retardation protein interacting protein 2	KIAA2026	KIAA2026	MBD6	methyl-CpG binding domain protein 6	LCOR	ligand dependent nuclear receptor corepressor	ZMIZ1	zinc finger, MIZ-type containing 1	EIF2AK3	eukaryotic translation initiation factor 2-alpha kinase 3	PTGS2	prostaglandin-endoperoxide synthase 2 (prostaglandin G/H synthase and cyclooxygenase)	PTGDR	prostaglandin D2 receptor (DP)	REXO1	REX1, RNA exonuclease 1 homolog (S. cerevisiae)	PCDHA12	protocadherin alpha 12
		PCDHA13	protocadherin alpha 13	MST150	MSTP150			MAST1	microtubule associated serine/threonine kinase 1	ENPP1	ectonucleotide pyrophosphatase/phosphodiesterase 1	OTUD4	OTU domain containing 4	SULF1	sulfatase 1	DDX58	DEAD (Asp-Glu-Ala-Asp) box polypeptide 58	FAM80A	family with sequence similarity 80, member A	YTHDF3	YTH domain family, member 3	FBXL19	F-box and leucine-rich repeat protein 19	NR2C2	nuclear receptor subfamily 2, group C, member 2	CSMD1	CUB and Sushi multiple domains 1	PCDHA13	protocadherin alpha 13
		PCDHA2	protocadherin alpha 2	CCDC4	coiled-coil domain containing 4			LAMC1	laminin, gamma 1 (formerly LAMB2)	CUL4A	cullin 4A	PTP4A1	protein tyrosine phosphatase type IVA, member 1	PPARA	peroxisome proliferator-activated receptor alpha	SRP54	signal recognition particle 54kDa	SERBP1	SERPINE1 mRNA binding protein 1	SNTB2	syntrophin, beta 2 (dystrophin-associated protein A1, 59kDa, basic component 2)	STYX	serine/threonine/tyrosine interacting protein	PSMA1	proteasome (prosome, macropain) subunit, alpha type, 1	SUPT6H	suppressor of Ty 6 homolog (S. cerevisiae)	PCDHA2	protocadherin alpha 2
		PCDHA3	protocadherin alpha 3	FZD4	frizzled homolog 4 (Drosophila)			MAF	v-maf musculoaponeurotic fibrosarcoma oncogene homolog (avian)	DLAT	dihydrolipoamide S-acetyltransferase	EML1	echinoderm microtubule associated protein like 1	SBF2	SET binding factor 2	HNMT	histamine N-methyltransferase	IGSF22	immunoglobulin superfamily, member 22	CAPZA2	capping protein (actin filament) muscle Z-line, alpha 2	KBTBD8	kelch repeat and BTB (POZ) domain containing 8	C7orf41	chromosome 7 open reading frame 41	GRIN3A	glutamate receptor, ionotropic, N-methyl-D-aspartate 3A	PCDHA3	protocadherin alpha 3
		PCDHA4	protocadherin alpha 4	PTAR1	protein prenyltransferase alpha subunit repeat containing 1			CCND1	cyclin D1	BCAT1	branched chain aminotransferase 1, cytosolic	KLF9	Kruppel-like factor 9	COQ10B	coenzyme Q10 homolog B (S. cerevisiae)	HIGD1A	HIG1 domain family, member 1A	PLEKHH2	pleckstrin homology domain containing, family H (with MyTH4 domain) member 2	COG3	component of oligomeric golgi complex 3	SERBP1	SERPINE1 mRNA binding protein 1	ASAH1	N-acylsphingosine amidohydrolase (acid ceramidase) 1	CRTAP	cartilage associated protein	PCDHA4	protocadherin alpha 4
		PCDHA5	protocadherin alpha 5	PEX11B	peroxisomal biogenesis factor 11B			VAPA	VAMP (vesicle-associated membrane protein)-associated protein A, 33kDa	RUNX2	runt-related transcription factor 2	C14orf129	chromosome 14 open reading frame 129	KIAA0101	KIAA0101	FAM80A	family with sequence similarity 80, member A	CRLF3	cytokine receptor-like factor 3	NOV	nephroblastoma overexpressed gene	TBC1D4	TBC1 domain family, member 4	LONRF1	LON peptidase N-terminal domain and ring finger 1	HRNBP3	hexaribonucleotide binding protein 3	PCDHA5	protocadherin alpha 5
		PCDHA6	protocadherin alpha 6	ZNF512B	zinc finger protein 512B			CTDSP1	CTD (carboxy-terminal domain, RNA polymerase II, polypeptide A) small phosphatase 1	RND3	Rho family GTPase 3	OXR1	oxidation resistance 1	GOLSYN	Golgi-localized protein	SLC25A12	solute carrier family 25 (mitochondrial carrier, Aralar), member 12	DENND4C	DENN/MADD domain containing 4C	GABPB2	GA binding protein transcription factor, beta subunit 2	PWWP2A	PWWP domain containing 2A	USP25	ubiquitin specific peptidase 25	ADRA2A	adrenergic, alpha-2A-, receptor	PCDHA6	protocadherin alpha 6
		PCDHA7	protocadherin alpha 7	BEGAIN	brain-enriched guanylate kinase-associated homolog (rat)			PCGF3	polycomb group ring finger 3	ARHGAP5	Rho GTPase activating protein 5	MAP6	microtubule-associated protein 6	TNPO2	transportin 2 (importin 3, karyopherin beta 2b)	BHLHB3	basic helix-loop-helix domain containing, class B, 3	NFYB	nuclear transcription factor Y, beta	ZNF804A	zinc finger protein 804A	ZNF608	zinc finger protein 608	KLF3	Kruppel-like factor 3 (basic)	MAFB	v-maf musculoaponeurotic fibrosarcoma oncogene homolog B (avian)	PCDHA7	protocadherin alpha 7
		PCDHA8	protocadherin alpha 8	SNX30	sorting nexin family member 30			BRUNOL6	bruno-like 6, RNA binding protein (Drosophila)	TGFBR1	transforming growth factor, beta receptor I (activin A receptor type II-like kinase, 53kDa)	SFRS7	splicing factor, arginine/serine-rich 7, 35kDa	KIAA0907	KIAA0907	TBC1D14	TBC1 domain family, member 14	TRIM2	tripartite motif-containing 2	ZMYM2	zinc finger, MYM-type 2	CDC6	cell division cycle 6 homolog (S. cerevisiae)	B4GALT3	UDP-Gal:betaGlcNAc beta 1,4- galactosyltransferase, polypeptide 3	PISD	phosphatidylserine decarboxylase	PCDHA8	protocadherin alpha 8
		NFYB	nuclear transcription factor Y, beta	GAS7	growth arrest-specific 7			MTMR3	myotubularin related protein 3	ZNF507	zinc finger protein 507	KIAA1804	mixed lineage kinase 4	KIAA1244	KIAA1244	AP3S2	adaptor-related protein complex 3, sigma 2 subunit	NIP7	nuclear import 7 homolog (S. cerevisiae)	FAM160B1	family with sequence similarity 160, member B1	PRKCD	protein kinase C, delta	ATXN10	ataxin 10	TEGT	testis enhanced gene transcript (BAX inhibitor 1)	NFYB	nuclear transcription factor Y, beta
		ASPH	aspartate beta-hydroxylase	RASGRP1	RAS guanyl releasing protein 1 (calcium and DAG-regulated)					MTF1	metal-regulatory transcription factor 1	DCTN4	dynactin 4 (p62)	FAM76B	family with sequence similarity 76, member B	ANK2	ankyrin 2, neuronal	C3orf63	chromosome 3 open reading frame 63	CD24	CD24 molecule	ABL2	v-abl Abelson murine leukemia viral oncogene homolog 2 (arg, Abelson-related gene)	NEDD4	neural precursor cell expressed, developmentally down-regulated 4	KIT	v-kit Hardy-Zuckerman 4 feline sarcoma viral oncogene homolog	ASPH	aspartate beta-hydroxylase
		KIAA0494	KIAA0494	RSPO2	R-spondin 2 homolog (Xenopus laevis)					SYPL1	synaptophysin-like 1	HIPK2	homeodomain interacting protein kinase 2	EDARADD	EDAR-associated death domain	LGI2	leucine-rich repeat LGI family, member 2	PHF20L1	PHD finger protein 20-like 1	ANKS1A	ankyrin repeat and sterile alpha motif domain containing 1A	COL10A1	collagen, type X, alpha 1(Schmid metaphyseal chondrodysplasia)	GLRA2	glycine receptor, alpha 2	HRB	HIV-1 Rev binding protein	KIAA0494	KIAA0494
		CCDC88A	coiled-coil domain containing 88A	UFM1	ubiquitin-fold modifier 1					WIF1	WNT inhibitory factor 1	RAD23B	RAD23 homolog B (S. cerevisiae)	GFPT1	glutamine-fructose-6-phosphate transaminase 1	ATF7IP2	activating transcription factor 7 interacting protein 2	TDRD5	tudor domain containing 5	ETV1	ets variant gene 1	GRAMD1C	GRAM domain containing 1C	PARD6B	par-6 partitioning defective 6 homolog beta (C. elegans)	ZYG11B	zyg-11 homolog B (C. elegans)	CCDC88A	coiled-coil domain containing 88A
		ACVR2B	activin A receptor, type IIB	CCNF	cyclin F					LRP2	low density lipoprotein-related protein 2	EDEM3	ER degradation enhancer, mannosidase alpha-like 3	FAM160A1	family with sequence similarity 160, member A1	SHOC2	soc-2 suppressor of clear homolog (C. elegans)	CTSC	cathepsin C	LRP6	low density lipoprotein receptor-related protein 6	COL19A1	collagen, type XIX, alpha 1	APPBP2	amyloid beta precursor protein (cytoplasmic tail) binding protein 2	HDAC4	histone deacetylase 4	ACVR2B	activin A receptor, type IIB
		ETS2	v-ets erythroblastosis virus E26 oncogene homolog 2 (avian)	GAN	giant axonal neuropathy (gigaxonin)					IKZF4	IKAROS family zinc finger 4 (Eos)	ANKHD1	ankyrin repeat and KH domain containing 1	CNGA3	cyclic nucleotide gated channel alpha 3	KSR2	kinase suppressor of ras 2	CNOT6	CCR4-NOT transcription complex, subunit 6	FBXO33	F-box protein 33	GRHL3	grainyhead-like 3 (Drosophila)	SS18L1	synovial sarcoma translocation gene on chromosome 18-like 1	MIER1	mesoderm induction early response 1 homolog (Xenopus laevis)	ETS2	v-ets erythroblastosis virus E26 oncogene homolog 2 (avian)
		FRS2	fibroblast growth factor receptor substrate 2	NIPA1	non imprinted in Prader-Willi/Angelman syndrome 1					MNX1	motor neuron and pancreas homeobox 1	FAM49A	family with sequence similarity 49, member A	ZBTB10	zinc finger and BTB domain containing 10	CPEB2	cytoplasmic polyadenylation element binding protein 2	ABI1	abl-interactor 1	NOVA1	neuro-oncological ventral antigen 1	NAMPT	nicotinamide phosphoribosyltransferase	PTGER3	prostaglandin E receptor 3 (subtype EP3)	WDR37	WD repeat domain 37	FRS2	fibroblast growth factor receptor substrate 2
		NOVA1	neuro-oncological ventral antigen 1	SNX6	sorting nexin 6					KCNJ3	potassium inwardly-rectifying channel, subfamily J, member 3	ZNF608	zinc finger protein 608	ELMOD2	ELMO/CED-12 domain containing 2	ARHGAP24	Rho GTPase activating protein 24	ATAD1	ATPase family, AAA domain containing 1	KLF12	Kruppel-like factor 12	VANGL2	vang-like 2 (van gogh, Drosophila)	SRGAP2	SLIT-ROBO Rho GTPase activating protein 2	AMOTL2	angiomotin like 2	NOVA1	neuro-oncological ventral antigen 1
		MED1	mediator complex subunit 1	FBXL12	F-box and leucine-rich repeat protein 12					IKZF1	IKAROS family zinc finger 1 (Ikaros)	LPGAT1	lysophosphatidylglycerol acyltransferase 1	SPATA2	spermatogenesis associated 2	TMEM154	transmembrane protein 154	KRAS	v-Ki-ras2 Kirsten rat sarcoma viral oncogene homolog	TCF12	transcription factor 12 (HTF4, helix-loop-helix transcription factors 4)	PLCB1	phospholipase C, beta 1 (phosphoinositide-specific)	PELI2	pellino homolog 2 (Drosophila)	CYBRD1	cytochrome b reductase 1	MED1	mediator complex subunit 1
		OSBPL3	oxysterol binding protein-like 3	KIAA1274	KIAA1274					PTPRM	protein tyrosine phosphatase, receptor type, M	SP4	Sp4 transcription factor	MAGI2	membrane associated guanylate kinase, WW and PDZ domain containing 2	ACVR2B	activin A receptor, type IIB	EPN2	epsin 2	KIAA1219	KIAA1219	RTF1	Rtf1, Paf1/RNA polymerase II complex component, homolog (S. cerevisiae)	C20orf194	chromosome 20 open reading frame 194	HOXC13	homeobox C13	OSBPL3	oxysterol binding protein-like 3
		ZADH2	zinc binding alcohol dehydrogenase domain containing 2	SMUG1	single-strand-selective monofunctional uracil-DNA glycosylase 1					NBEA	neurobeachin	RAB15	RAB15, member RAS onocogene family	IGF1	insulin-like growth factor 1 (somatomedin C)	SMAD4	SMAD family member 4	YWHAZ	tyrosine 3-monooxygenase/tryptophan 5-monooxygenase activation protein, zeta polypeptide	PEX5	peroxisomal biogenesis factor 5	DMRT3	doublesex and mab-3 related transcription factor 3	HOXB8	homeobox B8	WNT4	wingless-type MMTV integration site family, member 4	ZADH2	zinc binding alcohol dehydrogenase domain containing 2
		CRKL	v-crk sarcoma virus CT10 oncogene homolog (avian)-like	SCN11A	sodium channel, voltage-gated, type XI, alpha subunit					BCL11A	B-cell CLL/lymphoma 11A (zinc finger protein)	HDAC9	histone deacetylase 9	CLIP1	CAP-GLY domain containing linker protein 1	ISL1	ISL LIM homeobox 1	PAK4	p21 protein (Cdc42/Rac)-activated kinase 4	CDK6	cyclin-dependent kinase 6	MXI1	MAX interactor 1	CREB1	cAMP responsive element binding protein 1	TRIM52	tripartite motif-containing 52	CRKL	v-crk sarcoma virus CT10 oncogene homolog (avian)-like
		CYR61	cysteine-rich, angiogenic inducer, 61	MAN2A2	mannosidase, alpha, class 2A, member 2					HIPK2	homeodomain interacting protein kinase 2	RARB	retinoic acid receptor, beta	VPS4B	vacuolar protein sorting 4 homolog B (S. cerevisiae)	ZNRF3	zinc and ring finger 3	BRUNOL5	bruno-like 5, RNA binding protein (Drosophila)	METAP1	methionyl aminopeptidase 1	ENPEP	glutamyl aminopeptidase (aminopeptidase A)	TEGT	testis enhanced gene transcript (BAX inhibitor 1)	ESRRG	estrogen-related receptor gamma	CYR61	cysteine-rich, angiogenic inducer, 61
		DNAL1	dynein, axonemal, light chain 1	ZNF280B	zinc finger protein 280B					PIK3C3	phosphoinositide-3-kinase, class 3	NECAP1	NECAP endocytosis associated 1	EDNRB	endothelin receptor type B	RNF138	ring finger protein 138	CLYBL	citrate lyase beta like	CAMSAP1L1	calmodulin regulated spectrin-associated protein 1-like 1	ACSL3	acyl-CoA synthetase long-chain family member 3	HOXA10	homeobox A10	COPS2	COP9 constitutive photomorphogenic homolog subunit 2 (Arabidopsis)	DNAL1	dynein, axonemal, light chain 1
		GPM6A	glycoprotein M6A	LIN28	lin-28 homolog (C. elegans)					ARID2	AT rich interactive domain 2 (ARID, RFX-like)	PER2	period homolog 2 (Drosophila)	TRAK2	trafficking protein, kinesin binding 2	C5orf41	chromosome 5 open reading frame 41	VKORC1L1	vitamin K epoxide reductase complex, subunit 1-like 1	MYST4	MYST histone acetyltransferase (monocytic leukemia) 4	INHBB	inhibin, beta B	PKIA	protein kinase (cAMP-dependent, catalytic) inhibitor alpha	FBXO11	F-box protein 11	GPM6A	glycoprotein M6A
		TSC22D3	TSC22 domain family, member 3	NEK3	NIMA (never in mitosis gene a)-related kinase 3					BAHCC1	BAH domain and coiled-coil containing 1	ZNF280B	zinc finger protein 280B	GULP1	GULP, engulfment adaptor PTB domain containing 1	RBL2	retinoblastoma-like 2 (p130)	LPHN2	latrophilin 2	TBL1XR1	transducin (beta)-like 1 X-linked receptor 1	DCDC2	doublecortin domain containing 2	FAM108C1	family with sequence similarity 108, member C1	RCOR1	REST corepressor 1	TSC22D3	TSC22 domain family, member 3
		PRUNE	prune homolog (Drosophila)	DPP3	dipeptidyl-peptidase 3					BCL11B	B-cell CLL/lymphoma 11B (zinc finger protein)	CLOCK	clock homolog (mouse)	BAMBI	BMP and activin membrane-bound inhibitor homolog (Xenopus laevis)	PLAGL1	pleiomorphic adenoma gene-like 1	SRGAP2	SLIT-ROBO Rho GTPase activating protein 2	FOXO1	forkhead box O1	TNRC6A	trinucleotide repeat containing 6A	UBE2D1	ubiquitin-conjugating enzyme E2D 1 (UBC4/5 homolog, yeast)	C14orf83	chromosome 14 open reading frame 83	PRUNE	prune homolog (Drosophila)
		KPNA1	karyopherin alpha 1 (importin alpha 5)	TTC31	tetratricopeptide repeat domain 31					IREB2	iron-responsive element binding protein 2	MAML1	mastermind-like 1 (Drosophila)	NDFIP2	Nedd4 family interacting protein 2	ABI2	abl interactor 2	MN1	meningioma (disrupted in balanced translocation) 1	SLC20A2	solute carrier family 20 (phosphate transporter), member 2	BCCIP	BRCA2 and CDKN1A interacting protein	RAD9B	RAD9 homolog B (S. cerevisiae)	ZNF592	zinc finger protein 592	KPNA1	karyopherin alpha 1 (importin alpha 5)
		FOS	v-fos FBJ murine osteosarcoma viral oncogene homolog	LBA1	lupus brain antigen 1					MAFB	v-maf musculoaponeurotic fibrosarcoma oncogene homolog B (avian)	SPEN	spen homolog, transcriptional regulator (Drosophila)	CCPG1	cell cycle progression 1	RAVER1	ribonucleoprotein, PTB-binding 1	PHC3	polyhomeotic homolog 3 (Drosophila)	NFIB	nuclear factor I/B	RB1	retinoblastoma 1 (including osteosarcoma)	NR2F6	nuclear receptor subfamily 2, group F, member 6	NEUROD6	neurogenic differentiation 6	FOS	v-fos FBJ murine osteosarcoma viral oncogene homolog
		SPRED2	sprouty-related, EVH1 domain containing 2	DUSP16	dual specificity phosphatase 16					HDAC4	histone deacetylase 4	OTUD6B	OTU domain containing 6B	C8orf4	chromosome 8 open reading frame 4	OSBPL2	oxysterol binding protein-like 2	LAMC1	laminin, gamma 1 (formerly LAMB2)	C21orf66	chromosome 21 open reading frame 66	AMOT	angiomotin	P2RY5	purinergic receptor P2Y, G-protein coupled, 5	LASS6	LAG1 homolog, ceramide synthase 6	SPRED2	sprouty-related, EVH1 domain containing 2
		ITGB3	integrin, beta 3 (platelet glycoprotein IIIa, antigen CD61)	TNFSF9	tumor necrosis factor (ligand) superfamily, member 9					IMPACT	Impact homolog (mouse)	UBN1	ubinuclein 1	DOCK10	dedicator of cytokinesis 10	FAM123B	family with sequence similarity 123B	MECP2	methyl CpG binding protein 2 (Rett syndrome)	SLC7A11	solute carrier family 7, (cationic amino acid transporter, y+ system) member 11	DLG5	discs, large homolog 5 (Drosophila)	PRKAA2	protein kinase, AMP-activated, alpha 2 catalytic subunit	ARID2	AT rich interactive domain 2 (ARID, RFX-like)	ITGB3	integrin, beta 3 (platelet glycoprotein IIIa, antigen CD61)
		ANKRD10	ankyrin repeat domain 10	RDH10	retinol dehydrogenase 10 (all-trans)					TARDBP	TAR DNA binding protein	SLC35B4	solute carrier family 35, member B4	CR2	complement component (3d/Epstein Barr virus) receptor 2	TOX	thymocyte selection-associated high mobility group box	SLC30A6	solute carrier family 30 (zinc transporter), member 6	LPAR1	lysophosphatidic acid receptor 1	2010-09-10	septin 10	AFAP1	actin filament associated protein 1	CAMK2G	calcium/calmodulin-dependent protein kinase (CaM kinase) II gamma	ANKRD10	ankyrin repeat domain 10
		TLE3	transducin-like enhancer of split 3 (E(sp1) homolog, Drosophila)	PLA2G3	phospholipase A2, group III					ODZ1	odz, odd Oz/ten-m homolog 1(Drosophila)	CSAD	cysteine sulfinic acid decarboxylase	LIN9	lin-9 homolog (C. elegans)	PDGFB	platelet-derived growth factor beta polypeptide (simian sarcoma viral (v-sis) oncogene homolog)	HOXA5	homeobox A5	ABHD2	abhydrolase domain containing 2	HMGA1	high mobility group AT-hook 1	USP31	ubiquitin specific peptidase 31	RANBP9	RAN binding protein 9	TLE3	transducin-like enhancer of split 3 (E(sp1) homolog, Drosophila)
		SEMA3B	sema domain, immunoglobulin domain (Ig), short basic domain, secreted, (semaphorin) 3B	COL4A6	collagen, type IV, alpha 6					LOC162073	hypothetical protein LOC162073	LMLN	leishmanolysin-like (metallopeptidase M8 family)	GIGYF1	GRB10 interacting GYF protein 1	JAZF1	JAZF zinc finger 1	QKI	quaking homolog, KH domain RNA binding (mouse)	ELAVL3	ELAV (embryonic lethal, abnormal vision, Drosophila)-like 3 (Hu antigen C)	C3orf63	chromosome 3 open reading frame 63	2010-03-05	membrane-associated ring finger (C3HC4) 5	COLEC12	collectin sub-family member 12	SEMA3B	sema domain, immunoglobulin domain (Ig), short basic domain, secreted, (semaphorin) 3B
		AXIN2	axin 2 (conductin, axil)	ULK2	unc-51-like kinase 2 (C. elegans)					SEMA6A	sema domain, transmembrane domain (TM), and cytoplasmic domain, (semaphorin) 6A	DOLPP1	dolichyl pyrophosphate phosphatase 1	KIAA1128	KIAA1128	PIK3R1	phosphoinositide-3-kinase, regulatory subunit 1 (alpha)	COX8A	cytochrome c oxidase subunit 8A (ubiquitous)	WDR35	WD repeat domain 35	SRCAP	Snf2-related CREBBP activator protein	FLJ20309	hypothetical protein FLJ20309	UBE3A	ubiquitin protein ligase E3A (human papilloma virus E6-associated protein, Angelman syndrome)	AXIN2	axin 2 (conductin, axil)
		ADAMTS6	ADAM metallopeptidase with thrombospondin type 1 motif, 6	SCD	stearoyl-CoA desaturase (delta-9-desaturase)					EBF3	early B-cell factor 3	ADAM19	ADAM metallopeptidase domain 19 (meltrin beta)	IREB2	iron-responsive element binding protein 2	IGF2BP1	insulin-like growth factor 2 mRNA binding protein 1	MAPK1IP1L	mitogen-activated protein kinase 1 interacting protein 1-like	ROBO2	roundabout, axon guidance receptor, homolog 2 (Drosophila)	CTTNBP2NL	CTTNBP2 N-terminal like	RELN	reelin	CANX	calnexin	ADAMTS6	ADAM metallopeptidase with thrombospondin type 1 motif, 6
		NAP1L1	nucleosome assembly protein 1-like 1	KATNAL1	katanin p60 subunit A-like 1					ANKRD32	ankyrin repeat domain 32	NR4A2	nuclear receptor subfamily 4, group A, member 2	ENPP5	ectonucleotide pyrophosphatase/phosphodiesterase 5 (putative function)	ADIPOR1	adiponectin receptor 1	SCN1B	sodium channel, voltage-gated, type I, beta	CCPG1	cell cycle progression 1	LSM12	LSM12 homolog (S. cerevisiae)	LIMK1	LIM domain kinase 1	GPR6	G protein-coupled receptor 6	NAP1L1	nucleosome assembly protein 1-like 1
		PCGF3	polycomb group ring finger 3	SLC25A18	solute carrier family 25 (mitochondrial carrier), member 18					SH2D1A	SH2 domain protein 1A, Duncan's disease (lymphoproliferative syndrome)	C7orf60	chromosome 7 open reading frame 60	VTI1A	vesicle transport through interaction with t-SNAREs homolog 1A (yeast)	CNOT6L	CCR4-NOT transcription complex, subunit 6-like	ANKRD52	ankyrin repeat domain 52	RUNX3	runt-related transcription factor 3	EPS15	epidermal growth factor receptor pathway substrate 15	CUGBP2	CUG triplet repeat, RNA binding protein 2	EPB41L1	erythrocyte membrane protein band 4.1-like 1	PCGF3	polycomb group ring finger 3
		KHDRBS2	KH domain containing, RNA binding, signal transduction associated 2	MIB1	mindbomb homolog 1 (Drosophila)					CPEB3	cytoplasmic polyadenylation element binding protein 3	NCAM1	neural cell adhesion molecule 1	JAZF1	JAZF zinc finger 1	NR3C2	nuclear receptor subfamily 3, group C, member 2	C18orf25	chromosome 18 open reading frame 25	DGKI	diacylglycerol kinase, iota	TAF9B	TAF9B RNA polymerase II, TATA box binding protein (TBP)-associated factor, 31kDa	PLCH1	phospholipase C, eta 1	NAV3	neuron navigator 3	KHDRBS2	KH domain containing, RNA binding, signal transduction associated 2
		MEX3A	mex-3 homolog A (C. elegans)	ST8SIA1	ST8 alpha-N-acetyl-neuraminide alpha-2,8-sialyltransferase 1					ZZEF1	zinc finger, ZZ-type with EF-hand domain 1	TTC8	tetratricopeptide repeat domain 8	MYCL1	v-myc myelocytomatosis viral oncogene homolog 1, lung carcinoma derived (avian)	ERC2	ELKS/RAB6-interacting/CAST family member 2	IQGAP1	IQ motif containing GTPase activating protein 1	STXBP3	syntaxin binding protein 3	NSF	N-ethylmaleimide-sensitive factor	SFXN4	sideroflexin 4	MIPOL1	mirror-image polydactyly 1	MEX3A	mex-3 homolog A (C. elegans)
		SOX10	SRY (sex determining region Y)-box 10	INTS2	integrator complex subunit 2					LYPD6	LY6/PLAUR domain containing 6	RNF165	ring finger protein 165	BTBD7	BTB (POZ) domain containing 7	CRK	v-crk sarcoma virus CT10 oncogene homolog (avian)	HIVEP2	human immunodeficiency virus type I enhancer binding protein 2	PHF13	PHD finger protein 13	MAP3K2	mitogen-activated protein kinase kinase kinase 2	KIAA1737	KIAA1737	MEF2C	myocyte enhancer factor 2C	SOX10	SRY (sex determining region Y)-box 10
		HIPK2	homeodomain interacting protein kinase 2	RGS16	regulator of G-protein signaling 16					NXPH1	neurexophilin 1	FAM110B	family with sequence similarity 110, member B	CHST1	carbohydrate (keratan sulfate Gal-6) sulfotransferase 1	METTL7A	methyltransferase like 7A	HIPK2	homeodomain interacting protein kinase 2	RASL11B	RAS-like, family 11, member B	RAB3IP	RAB3A interacting protein (rabin3)	TEAD1	TEA domain family member 1 (SV40 transcriptional enhancer factor)	FAM46C	family with sequence similarity 46, member C	HIPK2	homeodomain interacting protein kinase 2
		NLK	nemo-like kinase	FLJ36031	hypothetical protein FLJ36031					ANKS1B	ankyrin repeat and sterile alpha motif domain containing 1B	KLF12	Kruppel-like factor 12	FAM80A	family with sequence similarity 80, member A	KIAA1539	KIAA1539	RNF169	ring finger protein 169	ACVR2B	activin A receptor, type IIB	ADAM19	ADAM metallopeptidase domain 19 (meltrin beta)	NPEPPS	aminopeptidase puromycin sensitive	BASP1	brain abundant, membrane attached signal protein 1	NLK	nemo-like kinase
		MYO10	myosin X	TMPRSS2	transmembrane protease, serine 2					MGC24039	hypothetical protein MGC24039	LRRC17	leucine rich repeat containing 17	IGFBP3	insulin-like growth factor binding protein 3	XPO4	exportin 4	HDLBP	high density lipoprotein binding protein	MAP7D1	MAP7 domain containing 1	UBE4B	ubiquitination factor E4B (UFD2 homolog, yeast)	NEK6	NIMA (never in mitosis gene a)-related kinase 6	VTI1A	vesicle transport through interaction with t-SNAREs homolog 1A (yeast)	MYO10	myosin X
		ANKHD1	ankyrin repeat and KH domain containing 1	GPR26	G protein-coupled receptor 26					TBK1	TANK-binding kinase 1	ADAMTS3	ADAM metallopeptidase with thrombospondin type 1 motif, 3	KPNA3	karyopherin alpha 3 (importin alpha 4)	CDADC1	cytidine and dCMP deaminase domain containing 1	MBNL1	muscleblind-like (Drosophila)	ABTB2	ankyrin repeat and BTB (POZ) domain containing 2	DSCR6	Down syndrome critical region gene 6	KCNJ1	potassium inwardly-rectifying channel, subfamily J, member 1	PRDM16	PR domain containing 16	ANKHD1	ankyrin repeat and KH domain containing 1
		ZCCHC16	zinc finger, CCHC domain containing 16	PDE12	phosphodiesterase 12					SP3	Sp3 transcription factor	RUNX1	runt-related transcription factor 1 (acute myeloid leukemia 1; aml1 oncogene)	E2F8	E2F transcription factor 8	XPNPEP3	X-prolyl aminopeptidase (aminopeptidase P) 3, putative	UXS1	UDP-glucuronate decarboxylase 1	CDYL	chromodomain protein, Y-like	ANKS1A	ankyrin repeat and sterile alpha motif domain containing 1A	RS1	retinoschisis (X-linked, juvenile) 1	EVI5	ecotropic viral integration site 5	ZCCHC16	zinc finger, CCHC domain containing 16
		CCDC4	coiled-coil domain containing 4	WARS2	tryptophanyl tRNA synthetase 2, mitochondrial					ID1	inhibitor of DNA binding 1, dominant negative helix-loop-helix protein	FAM91A1	family with sequence similarity 91, member A1	ELOVL5	ELOVL family member 5, elongation of long chain fatty acids (FEN1/Elo2, SUR4/Elo3-like, yeast)	KIAA0947	KIAA0947 protein	TMEM216	transmembrane protein 216	STAU2	staufen, RNA binding protein, homolog 2 (Drosophila)	SERP1	stress-associated endoplasmic reticulum protein 1	RARA	retinoic acid receptor, alpha	GOLGA3	golgi autoantigen, golgin subfamily a, 3	CCDC4	coiled-coil domain containing 4
		PAK1	p21 protein (Cdc42/Rac)-activated kinase 1	DLC1	deleted in liver cancer 1					RBM27	RNA binding motif protein 27	GNPDA1	glucosamine-6-phosphate deaminase 1	ABHD7	abhydrolase domain containing 7	PNRC2	proline-rich nuclear receptor coactivator 2	CDK5R1	cyclin-dependent kinase 5, regulatory subunit 1 (p35)	AKAP13	A kinase (PRKA) anchor protein 13	RCN1	reticulocalbin 1, EF-hand calcium binding domain	ADAMTSL3	ADAMTS-like 3	GLCCI1	glucocorticoid induced transcript 1	PAK1	p21 protein (Cdc42/Rac)-activated kinase 1
		POGZ	pogo transposable element with ZNF domain	HIF3A	hypoxia inducible factor 3, alpha subunit					ZAK	sterile alpha motif and leucine zipper containing kinase AZK	IL1RAPL2	interleukin 1 receptor accessory protein-like 2	C2orf42	chromosome 2 open reading frame 42	VPS13C	vacuolar protein sorting 13 homolog C (S. cerevisiae)	EPAS1	endothelial PAS domain protein 1	C10orf97	chromosome 10 open reading frame 97	RDH14	retinol dehydrogenase 14 (all-trans/9-cis/11-cis)	SLC16A10	solute carrier family 16, member 10 (aromatic amino acid transporter)	ADAMTS5	ADAM metallopeptidase with thrombospondin type 1 motif, 5 (aggrecanase-2)	POGZ	pogo transposable element with ZNF domain
		RAB1A	RAB1A, member RAS oncogene family	SFRS12IP1	SFRS12-interacting protein 1					DMD	dystrophin (muscular dystrophy, Duchenne and Becker types)	KIAA1632	KIAA1632	SEC22A	SEC22 vesicle trafficking protein homolog A (S. cerevisiae)	DUSP11	dual specificity phosphatase 11 (RNA/RNP complex 1-interacting)	ENAH	enabled homolog (Drosophila)	SST	somatostatin	ATP1A2	ATPase, Na+/K+ transporting, alpha 2 (+) polypeptide	NKAIN1	Na+/K+ transporting ATPase interacting 1	C7orf26	chromosome 7 open reading frame 26	RAB1A	RAB1A, member RAS oncogene family
		FIGNL2	fidgetin-like 2	SOCS4	suppressor of cytokine signaling 4					CNTN4	contactin 4	PICALM	phosphatidylinositol binding clathrin assembly protein	BNC2	basonuclin 2	PTPRD	protein tyrosine phosphatase, receptor type, D	CEP170	centrosomal protein 170kDa	DYRK2	dual-specificity tyrosine-(Y)-phosphorylation regulated kinase 2	RNF6	ring finger protein (C3H2C3 type) 6	INPP1	inositol polyphosphate-1-phosphatase	FREQ	frequenin homolog (Drosophila)	FIGNL2	fidgetin-like 2
		VAPB	VAMP (vesicle-associated membrane protein)-associated protein B and C	ZNF689	zinc finger protein 689					ABTB2	ankyrin repeat and BTB (POZ) domain containing 2	ST8SIA4	ST8 alpha-N-acetyl-neuraminide alpha-2,8-sialyltransferase 4	AMMECR1L	AMME chromosomal region gene 1-like	PSMD9	proteasome (prosome, macropain) 26S subunit, non-ATPase, 9	CHL1	cell adhesion molecule with homology to L1CAM (close homolog of L1)	APC	adenomatous polyposis coli	HSPA8	heat shock 70kDa protein 8	ZMYM4	zinc finger, MYM-type 4	PACS2	phosphofurin acidic cluster sorting protein 2	VAPB	VAMP (vesicle-associated membrane protein)-associated protein B and C
		IKZF4	IKAROS family zinc finger 4 (Eos)	FNIP1	folliculin interacting protein 1					FAM18B	family with sequence similarity 18, member B	TNKS	tankyrase, TRF1-interacting ankyrin-related ADP-ribose polymerase	SOCS3	suppressor of cytokine signaling 3	ST8SIA1	ST8 alpha-N-acetyl-neuraminide alpha-2,8-sialyltransferase 1	DNAJB12	DnaJ (Hsp40) homolog, subfamily B, member 12	PLXNA2	plexin A2	MEX3B	mex-3 homolog B (C. elegans)	KIAA1576	KIAA1576 protein	BDNF	brain-derived neurotrophic factor	IKZF4	IKAROS family zinc finger 4 (Eos)
		BBC3	BCL2 binding component 3	GALC	galactosylceramidase					FEM1C	fem-1 homolog c (C. elegans)	SOCS3	suppressor of cytokine signaling 3	HIPK3	homeodomain interacting protein kinase 3	TEX261	testis expressed 261	ATP6V0A1	ATPase, H+ transporting, lysosomal V0 subunit a1	ZBTB10	zinc finger and BTB domain containing 10	KPNA2	karyopherin alpha 2 (RAG cohort 1, importin alpha 1)	TGOLN2	trans-golgi network protein 2	DAAM1	dishevelled associated activator of morphogenesis 1	BBC3	BCL2 binding component 3
		DYRK1A	dual-specificity tyrosine-(Y)-phosphorylation regulated kinase 1A	CCR7	chemokine (C-C motif) receptor 7					CBX3	chromobox homolog 3 (HP1 gamma homolog, Drosophila)	TXNDC5	thioredoxin domain containing 5	ZAK	sterile alpha motif and leucine zipper containing kinase AZK	GCM1	glial cells missing homolog 1 (Drosophila)	PAX6	paired box 6	SLC35A2	solute carrier family 35 (UDP-galactose transporter), member A2	CDK8	cyclin-dependent kinase 8	ARF3	ADP-ribosylation factor 3	C16orf72	chromosome 16 open reading frame 72	DYRK1A	dual-specificity tyrosine-(Y)-phosphorylation regulated kinase 1A
		REV1	REV1 homolog (S. cerevisiae)	HDHD1A	haloacid dehalogenase-like hydrolase domain containing 1A					SGK3	serum/glucocorticoid regulated kinase family, member 3	PCGF5	polycomb group ring finger 5	FAM114A1	family with sequence similarity 114, member A1	CNIH4	cornichon homolog 4 (Drosophila)	NAB1	NGFI-A binding protein 1 (EGR1 binding protein 1)	EIF4E	eukaryotic translation initiation factor 4E	PMAIP1	phorbol-12-myristate-13-acetate-induced protein 1	C1orf52	chromosome 1 open reading frame 52	TCF4	transcription factor 4	REV1	REV1 homolog (S. cerevisiae)
		WDR37	WD repeat domain 37	TET3	tet oncogene family member 3					ARHGAP20	Rho GTPase activating protein 20	IL2RA	interleukin 2 receptor, alpha	MAPK14	mitogen-activated protein kinase 14	MEX3C	mex-3 homolog C (C. elegans)	PBRM1	polybromo 1	RICTOR	rapamycin-insensitive companion of mTOR	EIF4G2	eukaryotic translation initiation factor 4 gamma, 2	RAPGEF2	Rap guanine nucleotide exchange factor (GEF) 2	WNK1	WNK lysine deficient protein kinase 1	WDR37	WD repeat domain 37
		BMI1	BMI1 polycomb ring finger oncogene	PAG1	phosphoprotein associated with glycosphingolipid microdomains 1					RICTOR	rapamycin-insensitive companion of mTOR	SLC5A3	solute carrier family 5 (inositol transporters), member 3	ARFIP1	ADP-ribosylation factor interacting protein 1 (arfaptin 1)	ZNRF1	zinc and ring finger 1	ZC3H12B	zinc finger CCCH-type containing 12B	AQP4	aquaporin 4	PON1	paraoxonase 1	BTG2	BTG family, member 2	E2F3	E2F transcription factor 3	BMI1	BMI1 polycomb ring finger oncogene
		ZNF629	zinc finger protein 629	E2F5	E2F transcription factor 5, p130-binding					SHANK2	SH3 and multiple ankyrin repeat domains 2	RASA1	RAS p21 protein activator (GTPase activating protein) 1	ANKRD13C	ankyrin repeat domain 13C	SYT11	synaptotagmin XI	ZFHX4	zinc finger homeobox 4	MAPRE1	microtubule-associated protein, RP/EB family, member 1	PLEKHG1	pleckstrin homology domain containing, family G (with RhoGef domain) member 1	CCNJ	cyclin J	SMURF1	SMAD specific E3 ubiquitin protein ligase 1	ZNF629	zinc finger protein 629
		ZEB2	zinc finger E-box binding homeobox 2	DKFZP564O0823	DKFZP564O0823 protein					RSPH3	radial spoke 3 homolog (Chlamydomonas)	FAP	fibroblast activation protein, alpha	ST3GAL5	ST3 beta-galactoside alpha-2,3-sialyltransferase 5	MAX	MYC associated factor X	SCAF1	SR-related CTD-associated factor 1	IKZF2	IKAROS family zinc finger 2 (Helios)	PDHX	pyruvate dehydrogenase complex, component X	SPRY2	sprouty homolog 2 (Drosophila)	KIAA0152	KIAA0152	ZEB2	zinc finger E-box binding homeobox 2
		NUFIP2	nuclear fragile X mental retardation protein interacting protein 2	PTPRD	protein tyrosine phosphatase, receptor type, D					ZNF830	zinc finger protein 830	RAB32	RAB32, member RAS oncogene family	CAMTA1	calmodulin binding transcription activator 1	HNF4A	hepatocyte nuclear factor 4, alpha	TRIM67	tripartite motif-containing 67	CMIP	c-Maf-inducing protein	HPGD	hydroxyprostaglandin dehydrogenase 15-(NAD)	CA10	carbonic anhydrase X	FIGN	fidgetin	NUFIP2	nuclear fragile X mental retardation protein interacting protein 2
		C14orf147	chromosome 14 open reading frame 147	HMGA1	high mobility group AT-hook 1					DDEF2	development and differentiation enhancing factor 2	TFDP1	transcription factor Dp-1	ALG2	asparagine-linked glycosylation 2 homolog (S. cerevisiae, alpha-1,3-mannosyltransferase)	SCP2	sterol carrier protein 2	FOXP2	forkhead box P2	STRN3	striatin, calmodulin binding protein 3	SEMA6D	sema domain, transmembrane domain (TM), and cytoplasmic domain, (semaphorin) 6D	DCP1A	DCP1 decapping enzyme homolog A (S. cerevisiae)	ANKRD28	ankyrin repeat domain 28	C14orf147	chromosome 14 open reading frame 147
		RND2	Rho family GTPase 2	EIF4G2	eukaryotic translation initiation factor 4 gamma, 2					TEC	tec protein tyrosine kinase	SLC1A2	solute carrier family 1 (glial high affinity glutamate transporter), member 2	ZFP161	zinc finger protein 161 homolog (mouse)	ACTG1	actin, gamma 1	EPC2	enhancer of polycomb homolog 2 (Drosophila)	ZNF24	zinc finger protein 24	PRKCQ	protein kinase C, theta	SMAD5	SMAD family member 5	RAPGEF1	Rap guanine nucleotide exchange factor (GEF) 1	RND2	Rho family GTPase 2
		WDR68	WD repeat domain 68	ABCC5	ATP-binding cassette, sub-family C (CFTR/MRP), member 5					SOS2	son of sevenless homolog 2 (Drosophila)	METAP2	methionyl aminopeptidase 2	AFTPH	aftiphilin	RPIA	ribose 5-phosphate isomerase A (ribose 5-phosphate epimerase)	CUL5	cullin 5	SELI	selenoprotein I	HOXA5	homeobox A5	NHS	Nance-Horan syndrome (congenital cataracts and dental anomalies)	FAM118A	family with sequence similarity 118, member A	WDR68	WD repeat domain 68
		KIAA1267	KIAA1267	ACVR2A	activin A receptor, type IIA					NLGN2	neuroligin 2	VPS26B	vacuolar protein sorting 26 homolog B (S. pombe)	DDX3X	DEAD (Asp-Glu-Ala-Asp) box polypeptide 3, X-linked	RNASE4	ribonuclease, RNase A family, 4	MST150	MSTP150	FBN1	fibrillin 1	ARPP-21	cyclic AMP-regulated phosphoprotein, 21 kD	BMP3	bone morphogenetic protein 3	STAC	SH3 and cysteine rich domain	KIAA1267	KIAA1267
		EMX2	empty spiracles homeobox 2	SFT2D3	SFT2 domain containing 3					GATA3	GATA binding protein 3	NAALADL2	N-acetylated alpha-linked acidic dipeptidase-like 2	ADCY1	adenylate cyclase 1 (brain)	BET1L	blocked early in transport 1 homolog (S. cerevisiae)-like	GLIS3	GLIS family zinc finger 3	AAK1	AP2 associated kinase 1	hCG_1790474	similar to cAMP-regulated phosphoprotein 19	SHC4	SHC (Src homology 2 domain containing) family, member 4	SHANK2	SH3 and multiple ankyrin repeat domains 2	EMX2	empty spiracles homeobox 2
		CD47	CD47 molecule	ZSWIM5	zinc finger, SWIM-type containing 5					ANKRD10	ankyrin repeat domain 10	RP5-1022P6.2	hypothetical protein KIAA1434	STK35	serine/threonine kinase 35	MYO1C	myosin IC	RAD9A	RAD9 homolog A (S. pombe)	SH3TC2	SH3 domain and tetratricopeptide repeats 2	RAP2C	RAP2C, member of RAS oncogene family	GLT25D2	glycosyltransferase 25 domain containing 2	DYRK2	dual-specificity tyrosine-(Y)-phosphorylation regulated kinase 2	CD47	CD47 molecule
		ANKRD52	ankyrin repeat domain 52	LOR	loricrin					PTCH1	patched homolog 1 (Drosophila)	OMG	oligodendrocyte myelin glycoprotein	TMEM16A	transmembrane protein 16A	GTPBP4	GTP binding protein 4	SPARC	secreted protein, acidic, cysteine-rich (osteonectin)	ELOVL5	ELOVL family member 5, elongation of long chain fatty acids (FEN1/Elo2, SUR4/Elo3-like, yeast)	MYH10	myosin, heavy chain 10, non-muscle	KIAA1012	KIAA1012	ZIC4	Zic family member 4	ANKRD52	ankyrin repeat domain 52
		SNCB	synuclein, beta	ZNF644	zinc finger protein 644					DYRK4	dual-specificity tyrosine-(Y)-phosphorylation regulated kinase 4	CBX2	chromobox homolog 2 (Pc class homolog, Drosophila)	SNX17	sorting nexin 17	MON2	MON2 homolog (S. cerevisiae)	HRNBP3	hexaribonucleotide binding protein 3	AP1S1	adaptor-related protein complex 1, sigma 1 subunit	BLOC1S2	biogenesis of lysosome-related organelles complex-1, subunit 2	PANK1	pantothenate kinase 1	SYVN1	synovial apoptosis inhibitor 1, synoviolin	SNCB	synuclein, beta
		MLLT6	myeloid/lymphoid or mixed-lineage leukemia (trithorax homolog, Drosophila); translocated to, 6	RDX	radixin					EYA4	eyes absent homolog 4 (Drosophila)	E2F7	E2F transcription factor 7	ADSS	adenylosuccinate synthase	GPATCH8	G patch domain containing 8	AGPAT5	1-acylglycerol-3-phosphate O-acyltransferase 5 (lysophosphatidic acid acyltransferase, epsilon)	RNF139	ring finger protein 139	CUGBP2	CUG triplet repeat, RNA binding protein 2	CHIC1	cysteine-rich hydrophobic domain 1	KCNC1	potassium voltage-gated channel, Shaw-related subfamily, member 1	MLLT6	myeloid/lymphoid or mixed-lineage leukemia (trithorax homolog, Drosophila); translocated to, 6
		MESDC1	mesoderm development candidate 1	PAPPA	pregnancy-associated plasma protein A, pappalysin 1					ZNF292	zinc finger protein 292	ERG	v-ets erythroblastosis virus E26 oncogene homolog (avian)	ARRDC4	arrestin domain containing 4	ENAH	enabled homolog (Drosophila)	RNF24	ring finger protein 24	KIAA2018	KIAA2018	TBC1D12	TBC1 domain family, member 12	RC3H1	ring finger and CCCH-type zinc finger domains 1	MSRB3	methionine sulfoxide reductase B3	MESDC1	mesoderm development candidate 1
		VASH1	vasohibin 1	RAB11FIP4	RAB11 family interacting protein 4 (class II)					KLF13	Kruppel-like factor 13	KLF10	Kruppel-like factor 10	TRIM37	tripartite motif-containing 37	WDR89	WD repeat domain 89	KLF13	Kruppel-like factor 13	CREM	cAMP responsive element modulator	PHLDB2	pleckstrin homology-like domain, family B, member 2	ARMC8	armadillo repeat containing 8	KCTD15	potassium channel tetramerisation domain containing 15	VASH1	vasohibin 1
		FPGT	fucose-1-phosphate guanylyltransferase	ADRB1	adrenergic, beta-1-, receptor					INTS6	integrator complex subunit 6	AKAP10	A kinase (PRKA) anchor protein 10	PTPRG	protein tyrosine phosphatase, receptor type, G	TBC1D8	TBC1 domain family, member 8 (with GRAM domain)	LEPR	leptin receptor	CREBZF	CREB/ATF bZIP transcription factor	ZNF410	zinc finger protein 410	VANGL1	vang-like 1 (van gogh, Drosophila)			FPGT	fucose-1-phosphate guanylyltransferase
		PHF2	PHD finger protein 2	C11orf57	chromosome 11 open reading frame 57					KCNMB2	potassium large conductance calcium-activated channel, subfamily M, beta member 2	TMEM16D	transmembrane protein 16D	PON2	paraoxonase 2	SNN	stannin	CENPJ	centromere protein J	HMGB3	high-mobility group box 3	SENP5	SUMO1/sentrin specific peptidase 5	NR5A2	nuclear receptor subfamily 5, group A, member 2			PHF2	PHD finger protein 2
		TRPS1	trichorhinophalangeal syndrome I	B3GNT1	UDP-GlcNAc:betaGal beta-1,3-N-acetylglucosaminyltransferase 1					AEBP2	AE binding protein 2	RAPGEF4	Rap guanine nucleotide exchange factor (GEF) 4	FAM83D	family with sequence similarity 83, member D	C1orf32	chromosome 1 open reading frame 32			UBR5	ubiquitin protein ligase E3 component n-recognin 5	NLK	nemo-like kinase	NR2F2	nuclear receptor subfamily 2, group F, member 2			TRPS1	trichorhinophalangeal syndrome I
		TMEM132B	transmembrane protein 132B	FAM123C	family with sequence similarity 123C					H3F3B	H3 histone, family 3B (H3.3B)	tcag7.1228	hypothetical protein FLJ25778	CDC42BPA	CDC42 binding protein kinase alpha (DMPK-like)	RDH10	retinol dehydrogenase 10 (all-trans)			ZFHX4	zinc finger homeobox 4	CCDC6	coiled-coil domain containing 6	PDHX	pyruvate dehydrogenase complex, component X			TMEM132B	transmembrane protein 132B
		CBFB	core-binding factor, beta subunit	POLL	polymerase (DNA directed), lambda					EDEM3	ER degradation enhancer, mannosidase alpha-like 3	FAM43A	family with sequence similarity 43, member A	ZYG11B	zyg-11 homolog B (C. elegans)	RAB6A	RAB6A, member RAS oncogene family			FBXO45	F-box protein 45	INTS2	integrator complex subunit 2	CCDC4	coiled-coil domain containing 4			CBFB	core-binding factor, beta subunit
		TET2	tet oncogene family member 2	NGF	nerve growth factor (beta polypeptide)					MKL2	MKL/myocardin-like 2	GATM	glycine amidinotransferase (L-arginine:glycine amidinotransferase)	ARC	activity-regulated cytoskeleton-associated protein	THRB	thyroid hormone receptor, beta (erythroblastic leukemia viral (v-erb-a) oncogene homolog 2, avian)			MXD1	MAX dimerization protein 1	CENTB2	centaurin, beta 2	RNF139	ring finger protein 139			TET2	tet oncogene family member 2
		APPBP2	amyloid beta precursor protein (cytoplasmic tail) binding protein 2	MGAT4A	mannosyl (alpha-1,3-)-glycoprotein beta-1,4-N-acetylglucosaminyltransferase, isozyme A					NR4A3	nuclear receptor subfamily 4, group A, member 3	LGI1	leucine-rich, glioma inactivated 1	USP6	ubiquitin specific peptidase 6 (Tre-2 oncogene)	PSCD3	pleckstrin homology, Sec7 and coiled-coil domains 3			HS6ST2	heparan sulfate 6-O-sulfotransferase 2	EP400	E1A binding protein p400	PDIA5	protein disulfide isomerase family A, member 5			APPBP2	amyloid beta precursor protein (cytoplasmic tail) binding protein 2
		FAT2	FAT tumor suppressor homolog 2 (Drosophila)	ZNF294	zinc finger protein 294					KCTD15	potassium channel tetramerisation domain containing 15	SH2B3	SH2B adaptor protein 3	TMEM196	transmembrane protein 196	BCL2L15	BCL2-like 15			GPX8	glutathione peroxidase 8	ZNF238	zinc finger protein 238	IKZF2	IKAROS family zinc finger 2 (Helios)			FAT2	FAT tumor suppressor homolog 2 (Drosophila)
		RNPS1	RNA binding protein S1, serine-rich domain	MXD1	MAX dimerization protein 1					AMOTL1	angiomotin like 1	CHD7	chromodomain helicase DNA binding protein 7	TMEM45A	transmembrane protein 45A	TNKS2	tankyrase, TRF1-interacting ankyrin-related ADP-ribose polymerase 2			CPNE8	copine VIII	ELAVL2	ELAV (embryonic lethal, abnormal vision, Drosophila)-like 2 (Hu antigen B)	RSBN1L	round spermatid basic protein 1-like			RNPS1	RNA binding protein S1, serine-rich domain
		LOC91461	hypothetical protein BC007901	BACE2	beta-site APP-cleaving enzyme 2					VPS4B	vacuolar protein sorting 4 homolog B (S. cerevisiae)	SCN8A	sodium channel, voltage gated, type VIII, alpha subunit	MAP4K3	mitogen-activated protein kinase kinase kinase kinase 3	CTNNB1	catenin (cadherin-associated protein), beta 1, 88kDa			PHACTR2	phosphatase and actin regulator 2	EIF5	eukaryotic translation initiation factor 5	IRF4	interferon regulatory factor 4			LOC91461	hypothetical protein BC007901
		ATP11B	ATPase, class VI, type 11B	ACTR10	actin-related protein 10 homolog (S. cerevisiae)					RAB22A	RAB22A, member RAS oncogene family	TTLL7	tubulin tyrosine ligase-like family, member 7	ARRDC3	arrestin domain containing 3	CCPG1	cell cycle progression 1			DAB2IP	DAB2 interacting protein	MICAL3	microtubule associated monoxygenase, calponin and LIM domain containing 3	CNN3	calponin 3, acidic			ATP11B	ATPase, class VI, type 11B
		RP11-35N6.1	plasticity related gene 3	PLXND1	plexin D1					SGIP1	SH3-domain GRB2-like (endophilin) interacting protein 1	PGM3	phosphoglucomutase 3	MAPK6	mitogen-activated protein kinase 6	ZBTB44	zinc finger and BTB domain containing 44			GNAO1	guanine nucleotide binding protein (G protein), alpha activating activity polypeptide O	HMGA2	high mobility group AT-hook 2	PAQR9	progestin and adipoQ receptor family member IX			RP11-35N6.1	plasticity related gene 3
		CDKN1C	cyclin-dependent kinase inhibitor 1C (p57, Kip2)	ZNF473	zinc finger protein 473					ETS2	v-ets erythroblastosis virus E26 oncogene homolog 2 (avian)	BECN1	beclin 1, autophagy related	CCND2	cyclin D2	GRIA4	glutamate receptor, ionotrophic, AMPA 4			SLAIN1	SLAIN motif family, member 1	MTDH	metadherin	RCOR3	REST corepressor 3			CDKN1C	cyclin-dependent kinase inhibitor 1C (p57, Kip2)
		KIAA0368	KIAA0368	KLHDC8B	kelch domain containing 8B					DAGLA	diacylglycerol lipase, alpha	REEP3	receptor accessory protein 3	DLG5	discs, large homolog 5 (Drosophila)	SAMD12	sterile alpha motif domain containing 12			ABCC8	ATP-binding cassette, sub-family C (CFTR/MRP), member 8	DEPDC1B	DEP domain containing 1B	QKI	quaking homolog, KH domain RNA binding (mouse)			KIAA0368	KIAA0368
		C10orf104	chromosome 10 open reading frame 104	PIGA	phosphatidylinositol glycan anchor biosynthesis, class A (paroxysmal nocturnal hemoglobinuria)					DNAJC6	DnaJ (Hsp40) homolog, subfamily C, member 6	CCNT2	cyclin T2	C5orf41	chromosome 5 open reading frame 41	PROCR	protein C receptor, endothelial (EPCR)			PPIH	peptidylprolyl isomerase H (cyclophilin H)	RUFY2	RUN and FYVE domain containing 2	ICHTHYIN	ichthyin protein			C10orf104	chromosome 10 open reading frame 104
		TCF3	transcription factor 3 (E2A immunoglobulin enhancer binding factors E12/E47)	E2F6	E2F transcription factor 6					DICER1	dicer 1, ribonuclease type III	ZFAND5	zinc finger, AN1-type domain 5	RBMS1	RNA binding motif, single stranded interacting protein 1	GFM1	G elongation factor, mitochondrial 1			FOXP2	forkhead box P2	SRGAP1	SLIT-ROBO Rho GTPase activating protein 1	C1orf144	chromosome 1 open reading frame 144			TCF3	transcription factor 3 (E2A immunoglobulin enhancer binding factors E12/E47)
		GTF2B	general transcription factor IIB	AEN	apoptosis enhancing nuclease					C1orf21	chromosome 1 open reading frame 21	GRIA2	glutamate receptor, ionotropic, AMPA 2	ID2	inhibitor of DNA binding 2, dominant negative helix-loop-helix protein	SORBS1	sorbin and SH3 domain containing 1			VPS13D	vacuolar protein sorting 13 homolog D (S. cerevisiae)	RCBTB1	regulator of chromosome condensation (RCC1) and BTB (POZ) domain containing protein 1	CNTNAP2	contactin associated protein-like 2			GTF2B	general transcription factor IIB
		CDON	Cdon homolog (mouse)	FLJ45032	similar to F40B5.2b					TBX18	T-box 18	WDR44	WD repeat domain 44	CAND1	cullin-associated and neddylation-dissociated 1	EIF4E3	eukaryotic translation initiation factor 4E family member 3			TSHZ3	teashirt zinc finger homeobox 3	FRAT2	frequently rearranged in advanced T-cell lymphomas 2	TAPT1	transmembrane anterior posterior transformation 1			CDON	Cdon homolog (mouse)
		LHFPL2	lipoma HMGIC fusion partner-like 2	GRPEL2	GrpE-like 2, mitochondrial (E. coli)					CPNE3	copine III	SYNGR3	synaptogyrin 3	NRK	Nik related kinase	GRIK3	glutamate receptor, ionotropic, kainate 3			JAM3	junctional adhesion molecule 3	MRAS	muscle RAS oncogene homolog	GFPT2	glutamine-fructose-6-phosphate transaminase 2			LHFPL2	lipoma HMGIC fusion partner-like 2
		SLC4A4	solute carrier family 4, sodium bicarbonate cotransporter, member 4	AKAP6	A kinase (PRKA) anchor protein 6					UST	uronyl-2-sulfotransferase	ZBTB6	zinc finger and BTB domain containing 6	NBEA	neurobeachin	ARID3B	AT rich interactive domain 3B (BRIGHT-like)			INPP5B	inositol polyphosphate-5-phosphatase, 75kDa	METAP2	methionyl aminopeptidase 2	NR1D2	nuclear receptor subfamily 1, group D, member 2			SLC4A4	solute carrier family 4, sodium bicarbonate cotransporter, member 4
		KSR1	kinase suppressor of ras 1	DDX26B	DEAD/H (Asp-Glu-Ala-Asp/His) box polypeptide 26B					SR140	U2-associated SR140 protein	RHOB	ras homolog gene family, member B	PIK3R3	phosphoinositide-3-kinase, regulatory subunit 3 (gamma)	TBC1D20	TBC1 domain family, member 20			EIF4G2	eukaryotic translation initiation factor 4 gamma, 2	TBC1D15	TBC1 domain family, member 15	TNRC6B	trinucleotide repeat containing 6B			KSR1	kinase suppressor of ras 1
		TIMP3	TIMP metallopeptidase inhibitor 3 (Sorsby fundus dystrophy, pseudoinflammatory)	SLC25A27	solute carrier family 25, member 27					YY1	YY1 transcription factor	PRPF40A	PRP40 pre-mRNA processing factor 40 homolog A (S. cerevisiae)	MICAL2	microtubule associated monoxygenase, calponin and LIM domain containing 2	LAX1	lymphocyte transmembrane adaptor 1			HIF1A	hypoxia-inducible factor 1, alpha subunit (basic helix-loop-helix transcription factor)	SLC4A4	solute carrier family 4, sodium bicarbonate cotransporter, member 4	TMCC1	transmembrane and coiled-coil domain family 1			TIMP3	TIMP metallopeptidase inhibitor 3 (Sorsby fundus dystrophy, pseudoinflammatory)
		BCL11B	B-cell CLL/lymphoma 11B (zinc finger protein)	HTR1E	5-hydroxytryptamine (serotonin) receptor 1E					KIAA0408	KIAA0408	CALCR	calcitonin receptor	IVNS1ABP	influenza virus NS1A binding protein	KIAA1305	KIAA1305			COQ10B	coenzyme Q10 homolog B (S. cerevisiae)	ABCC4	ATP-binding cassette, sub-family C (CFTR/MRP), member 4	OPHN1	oligophrenin 1			BCL11B	B-cell CLL/lymphoma 11B (zinc finger protein)
		TNRC6B	trinucleotide repeat containing 6B	ADRB3	adrenergic, beta-3-, receptor					DYRK1A	dual-specificity tyrosine-(Y)-phosphorylation regulated kinase 1A	CAT	catalase	S100PBP	S100P binding protein	ARID2	AT rich interactive domain 2 (ARID, RFX-like)			LPGAT1	lysophosphatidylglycerol acyltransferase 1	FBXO11	F-box protein 11	AICDA	activation-induced cytidine deaminase			TNRC6B	trinucleotide repeat containing 6B
		THRB	thyroid hormone receptor, beta (erythroblastic leukemia viral (v-erb-a) oncogene homolog 2, avian)	QARS	glutaminyl-tRNA synthetase					MIPOL1	mirror-image polydactyly 1	PAAF1	proteasomal ATPase-associated factor 1	B3GALNT2	beta-1,3-N-acetylgalactosaminyltransferase 2	SGK269	NKF3 kinase family member			C18orf34	chromosome 18 open reading frame 34	PHCA	phytoceramidase, alkaline	C8orf4	chromosome 8 open reading frame 4			THRB	thyroid hormone receptor, beta (erythroblastic leukemia viral (v-erb-a) oncogene homolog 2, avian)
		GNAI2	guanine nucleotide binding protein (G protein), alpha inhibiting activity polypeptide 2	XK	X-linked Kx blood group (McLeod syndrome)					USP15	ubiquitin specific peptidase 15	FAM46A	family with sequence similarity 46, member A	TTC9	tetratricopeptide repeat domain 9	SEMA5A	sema domain, seven thrombospondin repeats (type 1 and type 1-like), transmembrane domain (TM) and short cytoplasmic domain, (semaphorin) 5A			PHF3	PHD finger protein 3	SSX2IP	synovial sarcoma, X breakpoint 2 interacting protein	P11	26 serine protease			GNAI2	guanine nucleotide binding protein (G protein), alpha inhibiting activity polypeptide 2
		PITPNM2	phosphatidylinositol transfer protein, membrane-associated 2	RIOK3	RIO kinase 3 (yeast)					CCNL2	cyclin L2	CEP76	centrosomal protein 76kDa	NPAS2	neuronal PAS domain protein 2	DLC1	deleted in liver cancer 1			GOLGB1	golgin B1, golgi integral membrane protein	BAZ2B	bromodomain adjacent to zinc finger domain, 2B	MATN3	matrilin 3			PITPNM2	phosphatidylinositol transfer protein, membrane-associated 2
		KPNA2	karyopherin alpha 2 (RAG cohort 1, importin alpha 1)	CTHRC1	collagen triple helix repeat containing 1					RLF	rearranged L-myc fusion	BRD1	bromodomain containing 1	PCDH10	protocadherin 10	KIAA1462	KIAA1462			UBE2D3	ubiquitin-conjugating enzyme E2D 3 (UBC4/5 homolog, yeast)	MAEA	macrophage erythroblast attacher	PNKD	paroxysmal nonkinesigenic dyskinesia			KPNA2	karyopherin alpha 2 (RAG cohort 1, importin alpha 1)
		GLI2	GLI-Kruppel family member GLI2	IQCB1	IQ motif containing B1					PHLPP	PH domain and leucine rich repeat protein phosphatase	EAF1	ELL associated factor 1	SLC26A7	solute carrier family 26, member 7	PRKAR1A	protein kinase, cAMP-dependent, regulatory, type I, alpha (tissue specific extinguisher 1)			STARD13	StAR-related lipid transfer (START) domain containing 13	EZH2	enhancer of zeste homolog 2 (Drosophila)	2010-09-08	septin 8			GLI2	GLI-Kruppel family member GLI2
		RNF44	ring finger protein 44	NXT2	nuclear transport factor 2-like export factor 2					ARID5B	AT rich interactive domain 5B (MRF1-like)	PCDH17	protocadherin 17	ATXN7L1	ataxin 7-like 1	BRCA1	breast cancer 1, early onset			NDFIP1	Nedd4 family interacting protein 1	PTPN13	protein tyrosine phosphatase, non-receptor type 13 (APO-1/CD95 (Fas)-associated phosphatase)	UAP1	UDP-N-acteylglucosamine pyrophosphorylase 1			RNF44	ring finger protein 44
		DKK2	dickkopf homolog 2 (Xenopus laevis)	RICTOR	rapamycin-insensitive companion of mTOR					ATP11C	ATPase, class VI, type 11C	CCNK	cyclin K	LSM12	LSM12 homolog (S. cerevisiae)	SOCS6	suppressor of cytokine signaling 6			SHROOM3	shroom family member 3	KPNA6	karyopherin alpha 6 (importin alpha 7)	ITGA2	integrin, alpha 2 (CD49B, alpha 2 subunit of VLA-2 receptor)			DKK2	dickkopf homolog 2 (Xenopus laevis)
		SLAIN2	SLAIN motif family, member 2	GOLT1B	golgi transport 1 homolog B (S. cerevisiae)					GFRA2	GDNF family receptor alpha 2	SLC12A6	solute carrier family 12 (potassium/chloride transporters), member 6	ZFPM2	zinc finger protein, multitype 2	POLQ	polymerase (DNA directed), theta			GOLGA4	golgi autoantigen, golgin subfamily a, 4	FAM46C	family with sequence similarity 46, member C	BAG2	BCL2-associated athanogene 2			SLAIN2	SLAIN motif family, member 2
		AJAP1	adherens junctions associated protein 1	IKBKAP	inhibitor of kappa light polypeptide gene enhancer in B-cells, kinase complex-associated protein					PLAGL2	pleiomorphic adenoma gene-like 2	STK39	serine threonine kinase 39 (STE20/SPS1 homolog, yeast)	THBS1	thrombospondin 1	C2orf42	chromosome 2 open reading frame 42			SS18	synovial sarcoma translocation, chromosome 18	B4GALT4	UDP-Gal:betaGlcNAc beta 1,4- galactosyltransferase, polypeptide 4	ALDH4A1	aldehyde dehydrogenase 4 family, member A1			AJAP1	adherens junctions associated protein 1
		H3F3A	H3 histone, family 3A	SLAMF6	SLAM family member 6					PCTK2	PCTAIRE protein kinase 2	KIAA1549	KIAA1549	UBE2A	ubiquitin-conjugating enzyme E2A (RAD6 homolog)	CPEB4	cytoplasmic polyadenylation element binding protein 4			DYNC1LI1	dynein, cytoplasmic 1, light intermediate chain 1	ZNF462	zinc finger protein 462	ATP2B1	ATPase, Ca++ transporting, plasma membrane 1			H3F3A	H3 histone, family 3A
		HEG1	HEG homolog 1 (zebrafish)	AMT	aminomethyltransferase					CDC40	cell division cycle 40 homolog (S. cerevisiae)	ZSCAN29	zinc finger and SCAN domain containing 29	FAM43A	family with sequence similarity 43, member A	SETD3	SET domain containing 3			MNT	MAX binding protein	COL1A2	collagen, type I, alpha 2	FAM65B	family with sequence similarity 65, member B			HEG1	HEG homolog 1 (zebrafish)
		WEE1	WEE1 homolog (S. pombe)	IL13	interleukin 13					GDI2	GDP dissociation inhibitor 2	ELMOD2	ELMO/CED-12 domain containing 2	PNRC1	proline-rich nuclear receptor coactivator 1	ODZ2	odz, odd Oz/ten-m homolog 2 (Drosophila)			ITSN1	intersectin 1 (SH3 domain protein)	RCN2	reticulocalbin 2, EF-hand calcium binding domain	C6orf60	chromosome 6 open reading frame 60			WEE1	WEE1 homolog (S. pombe)
		IGF2BP2	insulin-like growth factor 2 mRNA binding protein 2	SNAP23	synaptosomal-associated protein, 23kDa					WDFY3	WD repeat and FYVE domain containing 3	SCYL3	SCY1-like 3 (S. cerevisiae)	PGM2L1	phosphoglucomutase 2-like 1	OXSR1	oxidative-stress responsive 1			HIPK2	homeodomain interacting protein kinase 2	USP53	ubiquitin specific peptidase 53	LPIN1	lipin 1			IGF2BP2	insulin-like growth factor 2 mRNA binding protein 2
		KSR2	kinase suppressor of ras 2	EDEM3	ER degradation enhancer, mannosidase alpha-like 3					PTAR1	protein prenyltransferase alpha subunit repeat containing 1	VKORC1L1	vitamin K epoxide reductase complex, subunit 1-like 1	ATP1A2	ATPase, Na+/K+ transporting, alpha 2 (+) polypeptide	TMEM203	transmembrane protein 203			EWSR1	Ewing sarcoma breakpoint region 1	PDIK1L	PDLIM1 interacting kinase 1 like	SNF1LK	SNF1-like kinase			KSR2	kinase suppressor of ras 2
		DCLK1	doublecortin-like kinase 1	RGS6	regulator of G-protein signaling 6					MED13	mediator complex subunit 13	PPARGC1A	peroxisome proliferator-activated receptor gamma, coactivator 1 alpha	FAM20B	family with sequence similarity 20, member B	SPATA2	spermatogenesis associated 2			PDE4A	phosphodiesterase 4A, cAMP-specific (phosphodiesterase E2 dunce homolog, Drosophila)	FAM44B	family with sequence similarity 44, member B	ZFHX3	zinc finger homeobox 3			DCLK1	doublecortin-like kinase 1
		TIPARP	TCDD-inducible poly(ADP-ribose) polymerase	ICOS	inducible T-cell co-stimulator					PTPN9	protein tyrosine phosphatase, non-receptor type 9	SETD7	SET domain containing (lysine methyltransferase) 7	ANKIB1	ankyrin repeat and IBR domain containing 1	ERMP1	endoplasmic reticulum metallopeptidase 1			CSMD1	CUB and Sushi multiple domains 1	PELI2	pellino homolog 2 (Drosophila)	STK39	serine threonine kinase 39 (STE20/SPS1 homolog, yeast)			TIPARP	TCDD-inducible poly(ADP-ribose) polymerase
		CBL	Cas-Br-M (murine) ecotropic retroviral transforming sequence	SLC16A9	solute carrier family 16, member 9 (monocarboxylic acid transporter 9)					ATXN10	ataxin 10	PCDH10	protocadherin 10	TEGT	testis enhanced gene transcript (BAX inhibitor 1)	PSMD5	proteasome (prosome, macropain) 26S subunit, non-ATPase, 5			MYO9B	myosin IXB	HEPHL1	hephaestin-like 1	KIAA1787	KIAA1787 protein			CBL	Cas-Br-M (murine) ecotropic retroviral transforming sequence
		ZNF654	zinc finger protein 654	TP53	tumor protein p53					B3GALT6	UDP-Gal:betaGal beta 1,3-galactosyltransferase polypeptide 6	TIA1	TIA1 cytotoxic granule-associated RNA binding protein	ZBTB4	zinc finger and BTB domain containing 4	HMG20A	high-mobility group 20A			EHMT1	euchromatic histone-lysine N-methyltransferase 1	MARK1	MAP/microtubule affinity-regulating kinase 1	ACTA2	actin, alpha 2, smooth muscle, aorta			ZNF654	zinc finger protein 654
		CAPRIN2	caprin family member 2	ATP8B4	ATPase, class I, type 8B, member 4					C5orf41	chromosome 5 open reading frame 41	RIPK5	receptor interacting protein kinase 5	SOX4	SRY (sex determining region Y)-box 4	CHD7	chromodomain helicase DNA binding protein 7			MEX3B	mex-3 homolog B (C. elegans)	PECAM1	platelet/endothelial cell adhesion molecule (CD31 antigen)	TMUB1	transmembrane and ubiquitin-like domain containing 1			CAPRIN2	caprin family member 2
		TP53INP2	tumor protein p53 inducible nuclear protein 2	PDP2	pyruvate dehydrogenase phosphatase isoenzyme 2					ATXN1	ataxin 1	ZNF644	zinc finger protein 644	SLC31A2	solute carrier family 31 (copper transporters), member 2	RFXDC2	regulatory factor X domain containing 2			PAPD5	PAP associated domain containing 5	HAS3	hyaluronan synthase 3	ARRDC4	arrestin domain containing 4			TP53INP2	tumor protein p53 inducible nuclear protein 2
		SLITRK5	SLIT and NTRK-like family, member 5	STK40	serine/threonine kinase 40					ANKRD12	ankyrin repeat domain 12	CTHRC1	collagen triple helix repeat containing 1	RHOB	ras homolog gene family, member B	STAC2	SH3 and cysteine rich domain 2			ZNRF3	zinc and ring finger 3	RGS4	regulator of G-protein signaling 4	MLL3	myeloid/lymphoid or mixed-lineage leukemia 3			SLITRK5	SLIT and NTRK-like family, member 5
		CNOT2	CCR4-NOT transcription complex, subunit 2	ZNF354A	zinc finger protein 354A					SATB2	SATB homeobox 2	ITGA6	integrin, alpha 6	PHF20	PHD finger protein 20	TUBD1	tubulin, delta 1			RUNX2	runt-related transcription factor 2	SFXN1	sideroflexin 1	ZNF608	zinc finger protein 608			CNOT2	CCR4-NOT transcription complex, subunit 2
		PNRC2	proline-rich nuclear receptor coactivator 2	KCNA6	potassium voltage-gated channel, shaker-related subfamily, member 6					PTPRD	protein tyrosine phosphatase, receptor type, D	OVOL1	ovo-like 1(Drosophila)	C14orf129	chromosome 14 open reading frame 129	PDE4D	phosphodiesterase 4D, cAMP-specific (phosphodiesterase E3 dunce homolog, Drosophila)			HNRNPA3	heterogeneous nuclear ribonucleoprotein A3	FA2H	fatty acid 2-hydroxylase	IKZF1	IKAROS family zinc finger 1 (Ikaros)			PNRC2	proline-rich nuclear receptor coactivator 2
		C17orf63	chromosome 17 open reading frame 63	KLHL6	kelch-like 6 (Drosophila)					ADAMTS3	ADAM metallopeptidase with thrombospondin type 1 motif, 3	PDSS1	prenyl (decaprenyl) diphosphate synthase, subunit 1	FOXP2	forkhead box P2	ELOVL7	ELOVL family member 7, elongation of long chain fatty acids (yeast)			MAPK14	mitogen-activated protein kinase 14	AKAP7	A kinase (PRKA) anchor protein 7	RNF141	ring finger protein 141			C17orf63	chromosome 17 open reading frame 63
		KLHL24	kelch-like 24 (Drosophila)	LIPH	lipase, member H					BDNF	brain-derived neurotrophic factor	ANKRD17	ankyrin repeat domain 17	ZNF521	zinc finger protein 521	ETS1	v-ets erythroblastosis virus E26 oncogene homolog 1 (avian)			C11orf30	chromosome 11 open reading frame 30	FAM55C	family with sequence similarity 55, member C	PHB	prohibitin			KLHL24	kelch-like 24 (Drosophila)
		CD2AP	CD2-associated protein	TRHDE	thyrotropin-releasing hormone degrading enzyme					DAZAP1	DAZ associated protein 1	ZBTB44	zinc finger and BTB domain containing 44	GOLGA6	golgi autoantigen, golgin subfamily a, 6	ANK3	ankyrin 3, node of Ranvier (ankyrin G)			NF1	neurofibromin 1 (neurofibromatosis, von Recklinghausen disease, Watson disease)	DDX3X	DEAD (Asp-Glu-Ala-Asp) box polypeptide 3, X-linked	VEGFC	vascular endothelial growth factor C			CD2AP	CD2-associated protein
		PTCHD1	patched domain containing 1	FAM118A	family with sequence similarity 118, member A					FOXD1	forkhead box D1	SEC23IP	SEC23 interacting protein	KLF13	Kruppel-like factor 13	PDAP1	PDGFA associated protein 1			FRMD4A	FERM domain containing 4A	EDEM3	ER degradation enhancer, mannosidase alpha-like 3	RSPO3	R-spondin 3 homolog (Xenopus laevis)			PTCHD1	patched domain containing 1
		IGF1	insulin-like growth factor 1 (somatomedin C)	LPGAT1	lysophosphatidylglycerol acyltransferase 1					MACF1	microtubule-actin crosslinking factor 1	LRP6	low density lipoprotein receptor-related protein 6	IGSF3	immunoglobulin superfamily, member 3	HSPA2	heat shock 70kDa protein 2			RAI1	retinoic acid induced 1	PAN3	PAN3 polyA specific ribonuclease subunit homolog (S. cerevisiae)	HBEGF	heparin-binding EGF-like growth factor			IGF1	insulin-like growth factor 1 (somatomedin C)
		ADAM11	ADAM metallopeptidase domain 11	C3orf64	chromosome 3 open reading frame 64					SRGAP2	SLIT-ROBO Rho GTPase activating protein 2	SCN1A	sodium channel, voltage-gated, type I, alpha subunit	USP37	ubiquitin specific peptidase 37	SMG7	Smg-7 homolog, nonsense mediated mRNA decay factor (C. elegans)			VSX2	visual system homeobox 2	ARMCX2	armadillo repeat containing, X-linked 2	FAM76B	family with sequence similarity 76, member B			ADAM11	ADAM metallopeptidase domain 11
		RANBP2	RAN binding protein 2	CPM	carboxypeptidase M					FAM135B	family with sequence similarity 135, member B	SH3RF1	SH3 domain containing ring finger 1	GOLGA6B	golgi autoantigen, golgin subfamily a, 6B	SLC9A9	solute carrier family 9 (sodium/hydrogen exchanger), member 9			C18orf1	chromosome 18 open reading frame 1	MAP2	microtubule-associated protein 2	TLK2	tousled-like kinase 2			RANBP2	RAN binding protein 2
		HSPC159	galectin-related protein	DHX57	DEAH (Asp-Glu-Ala-Asp/His) box polypeptide 57					CRAMP1L	Crm, cramped-like (Drosophila)	SNX1	sorting nexin 1	PLA2G10	phospholipase A2, group X	MAP3K2	mitogen-activated protein kinase kinase kinase 2			NRP1	neuropilin 1	RUFY3	RUN and FYVE domain containing 3	PIP5K1B	phosphatidylinositol-4-phosphate 5-kinase, type I, beta			HSPC159	galectin-related protein
		ZNF618	zinc finger protein 618	MAP4K4	mitogen-activated protein kinase kinase kinase kinase 4					TDGF1	teratocarcinoma-derived growth factor 1	HELZ	helicase with zinc finger	EFNB2	ephrin-B2	ANKRD11	ankyrin repeat domain 11			ADAM12	ADAM metallopeptidase domain 12 (meltrin alpha)	C7orf58	chromosome 7 open reading frame 58	OPA1	optic atrophy 1 (autosomal dominant)			ZNF618	zinc finger protein 618
		ZFP36	zinc finger protein 36, C3H type, homolog (mouse)	DNAJC1	DnaJ (Hsp40) homolog, subfamily C, member 1					TAOK3	TAO kinase 3	JOSD1	Josephin domain containing 1	GOLGA8E	golgi autoantigen, golgin subfamily a, 8E	ARF5	ADP-ribosylation factor 5			PPFIA1	protein tyrosine phosphatase, receptor type, f polypeptide (PTPRF), interacting protein (liprin), alpha 1	TRIB2	tribbles homolog 2 (Drosophila)	DTNA	dystrobrevin, alpha			ZFP36	zinc finger protein 36, C3H type, homolog (mouse)
		PDIK1L	PDLIM1 interacting kinase 1 like	SLC2A12	solute carrier family 2 (facilitated glucose transporter), member 12					MEIS1	Meis homeobox 1	PDE5A	phosphodiesterase 5A, cGMP-specific	GOLGA8G	golgi autoantigen, golgin subfamily a, 8G	TULP4	tubby like protein 4			MYO10	myosin X	SLC24A4	solute carrier family 24 (sodium/potassium/calcium exchanger), member 4	BRWD1	bromodomain and WD repeat domain containing 1			PDIK1L	PDLIM1 interacting kinase 1 like
		PDGFA	platelet-derived growth factor alpha polypeptide	GYG2	glycogenin 2					SP2	Sp2 transcription factor	FOXD1	forkhead box D1	FLJ32679	golgin-like hypothetical protein LOC440321	POU4F2	POU class 4 homeobox 2			PCF11	PCF11, cleavage and polyadenylation factor subunit, homolog (S. cerevisiae)	HSPA13	heat shock protein 70kDa family, member 13	NDUFS4	NADH dehydrogenase (ubiquinone) Fe-S protein 4, 18kDa (NADH-coenzyme Q reductase)			PDGFA	platelet-derived growth factor alpha polypeptide
		SH3BP4	SH3-domain binding protein 4	C15orf39	chromosome 15 open reading frame 39					PPP1CB	protein phosphatase 1, catalytic subunit, beta isoform	DOCK7	dedicator of cytokinesis 7	TSC1	tuberous sclerosis 1	SOBP	sine oculis binding protein homolog (Drosophila)			SCHIP1	schwannomin interacting protein 1	PHF6	PHD finger protein 6	HEG1	HEG homolog 1 (zebrafish)			SH3BP4	SH3-domain binding protein 4
		SLC1A2	solute carrier family 1 (glial high affinity glutamate transporter), member 2	LBR	lamin B receptor					KLHL24	kelch-like 24 (Drosophila)	RNMT	RNA (guanine-7-) methyltransferase	EVI1	ecotropic viral integration site 1	TTLL7	tubulin tyrosine ligase-like family, member 7			IMPACT	Impact homolog (mouse)	SLC19A2	solute carrier family 19 (thiamine transporter), member 2	TMEM189-UBE2V1	TMEM189-UBE2V1			SLC1A2	solute carrier family 1 (glial high affinity glutamate transporter), member 2
		CTTN	cortactin	ABCB9	ATP-binding cassette, sub-family B (MDR/TAP), member 9					FOXO1	forkhead box O1	COL9A3	collagen, type IX, alpha 3	MID1	midline 1 (Opitz/BBB syndrome)	ARPC1B	actin related protein 2/3 complex, subunit 1B, 41kDa			SENP2	SUMO1/sentrin/SMT3 specific peptidase 2	PTPRD	protein tyrosine phosphatase, receptor type, D	UBE2V1	ubiquitin-conjugating enzyme E2 variant 1			CTTN	cortactin
		ITGB8	integrin, beta 8	FGF11	fibroblast growth factor 11					NUDT4	nudix (nucleoside diphosphate linked moiety X)-type motif 4	TULP4	tubby like protein 4	FAT3	FAT tumor suppressor homolog 3 (Drosophila)	PXMP4	peroxisomal membrane protein 4, 24kDa			UBE2E1	ubiquitin-conjugating enzyme E2E 1 (UBC4/5 homolog, yeast)	ESR1	estrogen receptor 1	INSR	insulin receptor			ITGB8	integrin, beta 8
		NDFIP1	Nedd4 family interacting protein 1	LSM11	LSM11, U7 small nuclear RNA associated					EEA1	early endosome antigen 1	MLL3	myeloid/lymphoid or mixed-lineage leukemia 3	RAB18	RAB18, member RAS oncogene family	KCNA6	potassium voltage-gated channel, shaker-related subfamily, member 6			SNN	stannin	GREB1	GREB1 protein	RGS17	regulator of G-protein signaling 17			NDFIP1	Nedd4 family interacting protein 1
		MON2	MON2 homolog (S. cerevisiae)	SYT7	synaptotagmin VII					PCLO	piccolo (presynaptic cytomatrix protein)	DDAH1	dimethylarginine dimethylaminohydrolase 1	KIAA0528	KIAA0528	FLJ20309	hypothetical protein FLJ20309			SMC3	structural maintenance of chromosomes 3	ZFP106	zinc finger protein 106 homolog (mouse)	CNOT7	CCR4-NOT transcription complex, subunit 7			MON2	MON2 homolog (S. cerevisiae)
		DICER1	dicer 1, ribonuclease type III	EEA1	early endosome antigen 1					GRB10	growth factor receptor-bound protein 10	SNX10	sorting nexin 10	NAPB	N-ethylmaleimide-sensitive factor attachment protein, beta	PGR	progesterone receptor			FCHO2	FCH domain only 2	PAK2	p21 protein (Cdc42/Rac)-activated kinase 2	SRL	sarcalumenin			DICER1	dicer 1, ribonuclease type III
		LYSMD1	LysM, putative peptidoglycan-binding, domain containing 1	TMEM65	transmembrane protein 65					HISPPD2A	histidine acid phosphatase domain containing 2A	TMEM87A	transmembrane protein 87A	F3	coagulation factor III (thromboplastin, tissue factor)	PEX5L	peroxisomal biogenesis factor 5-like			ZC3H12B	zinc finger CCCH-type containing 12B	TMCC1	transmembrane and coiled-coil domain family 1	EFNB2	ephrin-B2			LYSMD1	LysM, putative peptidoglycan-binding, domain containing 1
		AP3M1	adaptor-related protein complex 3, mu 1 subunit	LY75	lymphocyte antigen 75					HORMAD1	HORMA domain containing 1	CHIC1	cysteine-rich hydrophobic domain 1	ADNP	activity-dependent neuroprotector homeobox	ATXN7L1	ataxin 7-like 1			SOX9	SRY (sex determining region Y)-box 9 (campomelic dysplasia, autosomal sex-reversal)	OSBPL2	oxysterol binding protein-like 2	COLQ	collagen-like tail subunit (single strand of homotrimer) of asymmetric acetylcholinesterase			AP3M1	adaptor-related protein complex 3, mu 1 subunit
		SH3PXD2B	SH3 and PX domains 2B	ANKRD49	ankyrin repeat domain 49					CD9	CD9 molecule	MAP4K4	mitogen-activated protein kinase kinase kinase kinase 4	LPP	LIM domain containing preferred translocation partner in lipoma	PDPK1	3-phosphoinositide dependent protein kinase-1			GRM5	glutamate receptor, metabotropic 5	BCR	breakpoint cluster region	AGPAT3	1-acylglycerol-3-phosphate O-acyltransferase 3			SH3PXD2B	SH3 and PX domains 2B
		AAK1	AP2 associated kinase 1	IRS2	insulin receptor substrate 2					ERRFI1	ERBB receptor feedback inhibitor 1	ATRN	attractin	TSHZ3	teashirt zinc finger homeobox 3	PDE11A	phosphodiesterase 11A			DICER1	dicer 1, ribonuclease type III	ADM	adrenomedullin	FAM78A	family with sequence similarity 78, member A			AAK1	AP2 associated kinase 1
		SFRS2	splicing factor, arginine/serine-rich 2	OSBPL3	oxysterol binding protein-like 3					NCK2	NCK adaptor protein 2	LIN28	lin-28 homolog (C. elegans)	PRKAA1	protein kinase, AMP-activated, alpha 1 catalytic subunit	NUFIP2	nuclear fragile X mental retardation protein interacting protein 2			LY75	lymphocyte antigen 75	CHAC1	ChaC, cation transport regulator homolog 1 (E. coli)	ING5	inhibitor of growth family, member 5			SFRS2	splicing factor, arginine/serine-rich 2
		ZMYM2	zinc finger, MYM-type 2	THBS1	thrombospondin 1					CD28	CD28 molecule	NHS	Nance-Horan syndrome (congenital cataracts and dental anomalies)	MYLIP	myosin regulatory light chain interacting protein	tcag7.1228	hypothetical protein FLJ25778			FSTL1	follistatin-like 1	LEF1	lymphoid enhancer-binding factor 1	XIAP	X-linked inhibitor of apoptosis			ZMYM2	zinc finger, MYM-type 2
		RANBP10	RAN binding protein 10	BZW2	basic leucine zipper and W2 domains 2					PTPN21	protein tyrosine phosphatase, non-receptor type 21	CHST2	carbohydrate (N-acetylglucosamine-6-O) sulfotransferase 2	TXLNA	taxilin alpha	DUSP28	dual specificity phosphatase 28			PAFAH1B1	platelet-activating factor acetylhydrolase, isoform Ib, alpha subunit 45kDa	EPHA2	EPH receptor A2	E2F7	E2F transcription factor 7			RANBP10	RAN binding protein 10
		HOXA7	homeobox A7	TPP1	tripeptidyl peptidase I					PLEKHA5	pleckstrin homology domain containing, family A member 5	SUV39H2	suppressor of variegation 3-9 homolog 2 (Drosophila)	KIAA2026	KIAA2026	CDC23	cell division cycle 23 homolog (S. cerevisiae)			DDEF2	development and differentiation enhancing factor 2	NFE2L3	nuclear factor (erythroid-derived 2)-like 3	NKTR	natural killer-tumor recognition sequence			HOXA7	homeobox A7
		NFAT5	nuclear factor of activated T-cells 5, tonicity-responsive	RFXDC1	regulatory factor X domain containing 1					PPP2R5A	protein phosphatase 2, regulatory subunit B', alpha isoform	ALG9	asparagine-linked glycosylation 9 homolog (S. cerevisiae, alpha- 1,2-mannosyltransferase)	RP11-35N6.1	plasticity related gene 3	LRIG1	leucine-rich repeats and immunoglobulin-like domains 1			B3GAT1	beta-1,3-glucuronyltransferase 1 (glucuronosyltransferase P)	LOC203547	hypothetical protein LOC203547	DKK2	dickkopf homolog 2 (Xenopus laevis)			NFAT5	nuclear factor of activated T-cells 5, tonicity-responsive
		MARCKS	myristoylated alanine-rich protein kinase C substrate	TTLL4	tubulin tyrosine ligase-like family, member 4					LIMK2	LIM domain kinase 2	RRAD	Ras-related associated with diabetes	DMXL2	Dmx-like 2	PRDM4	PR domain containing 4			TNRC6B	trinucleotide repeat containing 6B	MIER3	mesoderm induction early response 1, family member 3	BRPF3	bromodomain and PHD finger containing, 3			MARCKS	myristoylated alanine-rich protein kinase C substrate
		TBC1D22B	TBC1 domain family, member 22B	NDST2	N-deacetylase/N-sulfotransferase (heparan glucosaminyl) 2					LMO3	LIM domain only 3 (rhombotin-like 2)	PAPOLB	poly(A) polymerase beta (testis specific)	hCG_18385	similar to cAMP-regulated phosphoprotein	MOBKL1A	MOB1, Mps One Binder kinase activator-like 1A (yeast)			SFPQ	splicing factor proline/glutamine-rich (polypyrimidine tract binding protein associated)	FAM172A	family with sequence similarity 172, member A	POU2F3	POU class 2 homeobox 3			TBC1D22B	TBC1 domain family, member 22B
		TFAP2A	transcription factor AP-2 alpha (activating enhancer binding protein 2 alpha)	NRAS	neuroblastoma RAS viral (v-ras) oncogene homolog					PAFAH1B1	platelet-activating factor acetylhydrolase, isoform Ib, alpha subunit 45kDa	TAF4B	TAF4b RNA polymerase II, TATA box binding protein (TBP)-associated factor, 105kDa	SMARCA2	SWI/SNF related, matrix associated, actin dependent regulator of chromatin, subfamily a, member 2	CIT	citron (rho-interacting, serine/threonine kinase 21)			XKRX	XK, Kell blood group complex subunit-related, X-linked	FBXO28	F-box protein 28	EIF2C2	eukaryotic translation initiation factor 2C, 2			TFAP2A	transcription factor AP-2 alpha (activating enhancer binding protein 2 alpha)
		IL1RAPL1	interleukin 1 receptor accessory protein-like 1	ZBTB5	zinc finger and BTB domain containing 5					PUM1	pumilio homolog 1 (Drosophila)	MIB1	mindbomb homolog 1 (Drosophila)	ALPK2	alpha-kinase 2	FAM3D	family with sequence similarity 3, member D			CYBRD1	cytochrome b reductase 1	TANC2	tetratricopeptide repeat, ankyrin repeat and coiled-coil containing 2	TSC22D2	TSC22 domain family, member 2			IL1RAPL1	interleukin 1 receptor accessory protein-like 1
		E2F2	E2F transcription factor 2	BIN3	bridging integrator 3					GABRB2	gamma-aminobutyric acid (GABA) A receptor, beta 2	COL13A1	collagen, type XIII, alpha 1	FAM108C1	family with sequence similarity 108, member C1	MRAS	muscle RAS oncogene homolog			NRIP1	nuclear receptor interacting protein 1	KCNK1	potassium channel, subfamily K, member 1	GPD2	glycerol-3-phosphate dehydrogenase 2 (mitochondrial)			E2F2	E2F transcription factor 2
		RAB22A	RAB22A, member RAS oncogene family	C20orf194	chromosome 20 open reading frame 194					TAF4	TAF4 RNA polymerase II, TATA box binding protein (TBP)-associated factor, 135kDa	UBE2I	ubiquitin-conjugating enzyme E2I (UBC9 homolog, yeast)	FRAS1	Fraser syndrome 1	CYP4F22	cytochrome P450, family 4, subfamily F, polypeptide 22			SLC4A4	solute carrier family 4, sodium bicarbonate cotransporter, member 4	FLVCR1	feline leukemia virus subgroup C cellular receptor 1	ZNF783	zinc finger family member 783			RAB22A	RAB22A, member RAS oncogene family
		TCF4	transcription factor 4	CDKN1A	cyclin-dependent kinase inhibitor 1A (p21, Cip1)					CDYL2	chromodomain protein, Y-like 2	TMCC1	transmembrane and coiled-coil domain family 1	EHBP1	EH domain binding protein 1	P53AIP1	p53-regulated apoptosis-inducing protein 1			BMPR1B	bone morphogenetic protein receptor, type IB	PAPD4	PAP associated domain containing 4	LPCAT1	lysophosphatidylcholine acyltransferase 1			TCF4	transcription factor 4
		PRKRA	protein kinase, interferon-inducible double stranded RNA dependent activator	E2F2	E2F transcription factor 2					TAF6	TAF6 RNA polymerase II, TATA box binding protein (TBP)-associated factor, 80kDa	IL1A	interleukin 1, alpha	C20orf194	chromosome 20 open reading frame 194	ZFHX4	zinc finger homeobox 4			MGEA5	meningioma expressed antigen 5 (hyaluronidase)	SETD8	SET domain containing (lysine methyltransferase) 8	PPARA	peroxisome proliferator-activated receptor alpha			PRKRA	protein kinase, interferon-inducible double stranded RNA dependent activator
		BRWD1	bromodomain and WD repeat domain containing 1	NME6	non-metastatic cells 6, protein expressed in (nucleoside-diphosphate kinase)					CCDC140	coiled-coil domain containing 140	C13orf18	chromosome 13 open reading frame 18	PHF12	PHD finger protein 12	FAM43A	family with sequence similarity 43, member A			IQSEC1	IQ motif and Sec7 domain 1	FAM160A1	family with sequence similarity 160, member A1	KPNA3	karyopherin alpha 3 (importin alpha 4)			BRWD1	bromodomain and WD repeat domain containing 1
		FOXO3	forkhead box O3	TAF9B	TAF9B RNA polymerase II, TATA box binding protein (TBP)-associated factor, 31kDa					SERTAD2	SERTA domain containing 2	CLRN1	clarin 1	PHF14	PHD finger protein 14	PEG10	paternally expressed 10			HGF	hepatocyte growth factor (hepapoietin A; scatter factor)	MAP3K7IP3	mitogen-activated protein kinase kinase kinase 7 interacting protein 3	ANKRD43	ankyrin repeat domain 43			FOXO3	forkhead box O3
		DCX	doublecortex; lissencephaly, X-linked (doublecortin)	MYO1F	myosin IF					RING1	ring finger protein 1	USP48	ubiquitin specific peptidase 48	SEC61A2	Sec61 alpha 2 subunit (S. cerevisiae)	HDAC4	histone deacetylase 4			EBF3	early B-cell factor 3	FBXW2	F-box and WD repeat domain containing 2	ABBA-1	actin-bundling protein with BAIAP2 homology			DCX	doublecortex; lissencephaly, X-linked (doublecortin)
		KBTBD6	kelch repeat and BTB (POZ) domain containing 6	DMP1	dentin matrix acidic phosphoprotein					PATL1	protein associated with topoisomerase II homolog 1 (yeast)	P4HA2	procollagen-proline, 2-oxoglutarate 4-dioxygenase (proline 4-hydroxylase), alpha polypeptide II	FBXO8	F-box protein 8	KLF9	Kruppel-like factor 9			WAC	WW domain containing adaptor with coiled-coil	SNN	stannin	KPNB1	karyopherin (importin) beta 1			KBTBD6	kelch repeat and BTB (POZ) domain containing 6
		C16orf45	chromosome 16 open reading frame 45	EIF2S2	eukaryotic translation initiation factor 2, subunit 2 beta, 38kDa					PPARGC1A	peroxisome proliferator-activated receptor gamma, coactivator 1 alpha	PAPOLA	poly(A) polymerase alpha	DNAJB1	DnaJ (Hsp40) homolog, subfamily B, member 1	MAP3K7	mitogen-activated protein kinase kinase kinase 7			SAMD12	sterile alpha motif domain containing 12	G3BP2	GTPase activating protein (SH3 domain) binding protein 2	AIDA	axin interactor, dorsalization associated			C16orf45	chromosome 16 open reading frame 45
		YTHDC1	YTH domain containing 1	DLGAP4	discs, large (Drosophila) homolog-associated protein 4					KIAA0999	KIAA0999 protein	GLCCI1	glucocorticoid induced transcript 1	FUT4	fucosyltransferase 4 (alpha (1,3) fucosyltransferase, myeloid-specific)	FOXJ3	forkhead box J3			MAP3K5	mitogen-activated protein kinase kinase kinase 5	MIB1	mindbomb homolog 1 (Drosophila)	CTCF	CCCTC-binding factor (zinc finger protein)			YTHDC1	YTH domain containing 1
		SNIP	SNAP25-interacting protein	NOPE	neighbor of Punc E11					CSMD1	CUB and Sushi multiple domains 1	CPNE8	copine VIII	RNF111	ring finger protein 111	GNAZ	guanine nucleotide binding protein (G protein), alpha z polypeptide			KPNA6	karyopherin alpha 6 (importin alpha 7)	CD200	CD200 molecule	EN2	engrailed homeobox 2			SNIP	SNAP25-interacting protein
		UPF1	UPF1 regulator of nonsense transcripts homolog (yeast)	SEMA4C	sema domain, immunoglobulin domain (Ig), transmembrane domain (TM) and short cytoplasmic domain, (semaphorin) 4C					RAP2C	RAP2C, member of RAS oncogene family	DBF4	DBF4 homolog (S. cerevisiae)	ADIPOR2	adiponectin receptor 2	MGAT4A	mannosyl (alpha-1,3-)-glycoprotein beta-1,4-N-acetylglucosaminyltransferase, isozyme A			MITF	microphthalmia-associated transcription factor	ARHGAP26	Rho GTPase activating protein 26	COL21A1	collagen, type XXI, alpha 1			UPF1	UPF1 regulator of nonsense transcripts homolog (yeast)
		FNDC3B	fibronectin type III domain containing 3B	EEF2K	eukaryotic elongation factor-2 kinase					NSMCE4A	non-SMC element 4 homolog A (S. cerevisiae)	KIAA1147	KIAA1147	TBR1	T-box, brain, 1	RNF44	ring finger protein 44			NR5A2	nuclear receptor subfamily 5, group A, member 2	SH3D19	SH3 domain containing 19	NGFR	nerve growth factor receptor (TNFR superfamily, member 16)			FNDC3B	fibronectin type III domain containing 3B
		TIMP2	TIMP metallopeptidase inhibitor 2	DPF2	D4, zinc and double PHD fingers family 2					RNF180	ring finger protein 180	LRRC8D	leucine rich repeat containing 8 family, member D	ABHD5	abhydrolase domain containing 5	AUTS2	autism susceptibility candidate 2			EPS8	epidermal growth factor receptor pathway substrate 8	FGD1	FYVE, RhoGEF and PH domain containing 1 (faciogenital dysplasia)	FAM105B	family with sequence similarity 105, member B			TIMP2	TIMP metallopeptidase inhibitor 2
		SNX29	sorting nexin 29	TMC7	transmembrane channel-like 7					TEAD1	TEA domain family member 1 (SV40 transcriptional enhancer factor)	CASP3	caspase 3, apoptosis-related cysteine peptidase	MYCN	v-myc myelocytomatosis viral related oncogene, neuroblastoma derived (avian)	PURB	purine-rich element binding protein B			SGK3	serum/glucocorticoid regulated kinase family, member 3	KLHL24	kelch-like 24 (Drosophila)	FLRT3	fibronectin leucine rich transmembrane protein 3			SNX29	sorting nexin 29
		ITGA3	integrin, alpha 3 (antigen CD49C, alpha 3 subunit of VLA-3 receptor)	ANKRD43	ankyrin repeat domain 43					2010-03-06	membrane-associated ring finger (C3HC4) 6	MBNL3	muscleblind-like 3 (Drosophila)	FLJ14213	protor-2	RBMS1	RNA binding motif, single stranded interacting protein 1			AFAP1	actin filament associated protein 1	KIAA1598	KIAA1598	GPR126	G protein-coupled receptor 126			ITGA3	integrin, alpha 3 (antigen CD49C, alpha 3 subunit of VLA-3 receptor)
		KCNA1	potassium voltage-gated channel, shaker-related subfamily, member 1 (episodic ataxia with myokymia)	HOXD1	homeobox D1					ARNT	aryl hydrocarbon receptor nuclear translocator	PFN2	profilin 2	SLC6A8	solute carrier family 6 (neurotransmitter transporter, creatine), member 8	PTPRE	protein tyrosine phosphatase, receptor type, E			NARG1	NMDA receptor regulated 1	CCNJL	cyclin J-like	SEMA6D	sema domain, transmembrane domain (TM), and cytoplasmic domain, (semaphorin) 6D			KCNA1	potassium voltage-gated channel, shaker-related subfamily, member 1 (episodic ataxia with myokymia)
		WASF2	WAS protein family, member 2	PQLC2	PQ loop repeat containing 2					CPEB4	cytoplasmic polyadenylation element binding protein 4	FUCA1	fucosidase, alpha-L- 1, tissue	KIF3A	kinesin family member 3A	AMOTL2	angiomotin like 2			INTS6	integrator complex subunit 6	PHF21A	PHD finger protein 21A	MSL-1	male-specific lethal-1 homolog			WASF2	WAS protein family, member 2
		SOCS1	suppressor of cytokine signaling 1	SNX16	sorting nexin 16					ODZ3	odz, odd Oz/ten-m homolog 3 (Drosophila)	SMAD2	SMAD family member 2	BLCAP	bladder cancer associated protein	AKAP2	A kinase (PRKA) anchor protein 2			QKI	quaking homolog, KH domain RNA binding (mouse)	CMTM4	CKLF-like MARVEL transmembrane domain containing 4	ISL1	ISL LIM homeobox 1			SOCS1	suppressor of cytokine signaling 1
		DLG2	discs, large homolog 2, chapsyn-110 (Drosophila)	GALNTL2	UDP-N-acetyl-alpha-D-galactosamine:polypeptide N-acetylgalactosaminyltransferase-like 2					AMOTL2	angiomotin like 2	LEPR	leptin receptor	PLXNC1	plexin C1	NUFIP1	nuclear fragile X mental retardation protein interacting protein 1			FZD4	frizzled homolog 4 (Drosophila)	MAT2A	methionine adenosyltransferase II, alpha	BCL3	B-cell CLL/lymphoma 3			DLG2	discs, large homolog 2, chapsyn-110 (Drosophila)
		PVRL1	poliovirus receptor-related 1 (herpesvirus entry mediator C)	GLRX	glutaredoxin (thioltransferase)					MTPN	myotrophin	TANK	TRAF family member-associated NFKB activator	CXCL12	chemokine (C-X-C motif) ligand 12 (stromal cell-derived factor 1)	CASKIN1	CASK interacting protein 1			MBOAT2	membrane bound O-acyltransferase domain containing 2	PAG1	phosphoprotein associated with glycosphingolipid microdomains 1	KIAA0182	KIAA0182			PVRL1	poliovirus receptor-related 1 (herpesvirus entry mediator C)
		RNF165	ring finger protein 165	FASLG	Fas ligand (TNF superfamily, member 6)					TMEM19	transmembrane protein 19	PAWR	PRKC, apoptosis, WT1, regulator	PHF17	PHD finger protein 17	PALM2-AKAP2	PALM2-AKAP2			RBM7	RNA binding motif protein 7	GALNT10	UDP-N-acetyl-alpha-D-galactosamine:polypeptide N-acetylgalactosaminyltransferase 10 (GalNAc-T10)	LPL	lipoprotein lipase			RNF165	ring finger protein 165
		RIMBP2	RIMS binding protein 2	PRKAA2	protein kinase, AMP-activated, alpha 2 catalytic subunit					CREB3L1	cAMP responsive element binding protein 3-like 1	LARGE	like-glycosyltransferase	PPP2R5E	protein phosphatase 2, regulatory subunit B', epsilon isoform	CACNA1C	calcium channel, voltage-dependent, L type, alpha 1C subunit			SLCO4C1	solute carrier organic anion transporter family, member 4C1	SLC2A3	solute carrier family 2 (facilitated glucose transporter), member 3	BACE1	beta-site APP-cleaving enzyme 1			RIMBP2	RIMS binding protein 2
				PPARGC1B	peroxisome proliferator-activated receptor gamma, coactivator 1 beta					DNAJC21	DnaJ (Hsp40) homolog, subfamily C, member 21	PGM1	phosphoglucomutase 1	PRKACB	protein kinase, cAMP-dependent, catalytic, beta	PAQR3	progestin and adipoQ receptor family member III			ZNF148	zinc finger protein 148	LSM11	LSM11, U7 small nuclear RNA associated	ANK2	ankyrin 2, neuronal
				CPEB3	cytoplasmic polyadenylation element binding protein 3					RBM9	RNA binding motif protein 9	TACC1	transforming, acidic coiled-coil containing protein 1	RAP1B	RAP1B, member of RAS oncogene family	MRTO4	mRNA turnover 4 homolog (S. cerevisiae)			VANGL2	vang-like 2 (van gogh, Drosophila)	KIAA1468	KIAA1468	DCX	doublecortex; lissencephaly, X-linked (doublecortin)
				SLC25A24	solute carrier family 25 (mitochondrial carrier; phosphate carrier), member 24					BPTF	bromodomain PHD finger transcription factor	RPS6KA2	ribosomal protein S6 kinase, 90kDa, polypeptide 2	hCG_1757335	hCG1757335	TANC2	tetratricopeptide repeat, ankyrin repeat and coiled-coil containing 2			DLX5	distal-less homeobox 5	GRB10	growth factor receptor-bound protein 10	RNGTT	RNA guanylyltransferase and 5'-phosphatase
				PIK3IP1	phosphoinositide-3-kinase interacting protein 1					KIAA0240	KIAA0240	MAN1A2	mannosidase, alpha, class 1A, member 2	MED26	mediator complex subunit 26	NAV2	neuron navigator 2			CD81	CD81 molecule	TANK	TRAF family member-associated NFKB activator	NECAP1	NECAP endocytosis associated 1
				RBM9	RNA binding motif protein 9					NPAT	nuclear protein, ataxia-telangiectasia locus	FBXO45	F-box protein 45	ARHGAP11A	Rho GTPase activating protein 11A	HIATL1	hippocampus abundant transcript-like 1			TLX2	T-cell leukemia homeobox 2	BAK1	BCL2-antagonist/killer 1	MAP3K4	mitogen-activated protein kinase kinase kinase 4
				FAM104A	family with sequence similarity 104, member A					CSNK1G1	casein kinase 1, gamma 1	SIX4	SIX homeobox 4	AGPAT5	1-acylglycerol-3-phosphate O-acyltransferase 5 (lysophosphatidic acid acyltransferase, epsilon)	PALM2	paralemmin 2			RBM35A	RNA binding motif protein 35A	ITGB8	integrin, beta 8	LPHN2	latrophilin 2
				NNT	nicotinamide nucleotide transhydrogenase					RAPH1	Ras association (RalGDS/AF-6) and pleckstrin homology domains 1	LIN7C	lin-7 homolog C (C. elegans)	STAM2	signal transducing adaptor molecule (SH3 domain and ITAM motif) 2	SCARB2	scavenger receptor class B, member 2			C5orf13	chromosome 5 open reading frame 13	CHAF1A	chromatin assembly factor 1, subunit A (p150)	SATB2	SATB homeobox 2
				MGC13057	hypothetical protein MGC13057					HMGB3	high-mobility group box 3	DPYSL2	dihydropyrimidinase-like 2	ARFGEF1	ADP-ribosylation factor guanine nucleotide-exchange factor 1(brefeldin A-inhibited)	C12orf36	chromosome 12 open reading frame 36			ZFHX3	zinc finger homeobox 3	DUSP5	dual specificity phosphatase 5	NLK	nemo-like kinase
				OPRM1	opioid receptor, mu 1					BACH2	BTB and CNC homology 1, basic leucine zipper transcription factor 2	NEFL	neurofilament, light polypeptide 68kDa	PHF13	PHD finger protein 13	SYPL1	synaptophysin-like 1			UBE2D1	ubiquitin-conjugating enzyme E2D 1 (UBC4/5 homolog, yeast)	CDK2AP1	CDK2-associated protein 1	ZFP106	zinc finger protein 106 homolog (mouse)
				LINGO1	leucine rich repeat and Ig domain containing 1					MN1	meningioma (disrupted in balanced translocation) 1	XPR1	xenotropic and polytropic retrovirus receptor	PPTC7	PTC7 protein phosphatase homolog (S. cerevisiae)	CRISPLD2	cysteine-rich secretory protein LCCL domain containing 2			SLC39A14	solute carrier family 39 (zinc transporter), member 14	OBFC2A	oligonucleotide/oligosaccharide-binding fold containing 2A	RIT1	Ras-like without CAAX 1
				SLC12A9	solute carrier family 12 (potassium/chloride transporters), member 9					EVI1	ecotropic viral integration site 1	MLXIP	MLX interacting protein	IGF2R	insulin-like growth factor 2 receptor	BCL6B	B-cell CLL/lymphoma 6, member B (zinc finger protein)			HMGB1	high-mobility group box 1	PATL1	protein associated with topoisomerase II homolog 1 (yeast)	EPB41	erythrocyte membrane protein band 4.1 (elliptocytosis 1, RH-linked)
				PLEKHH1	pleckstrin homology domain containing, family H (with MyTH4 domain) member 1					KDELC2	KDEL (Lys-Asp-Glu-Leu) containing 2	ITSN1	intersectin 1 (SH3 domain protein)	CALM1	calmodulin 1 (phosphorylase kinase, delta)	INSR	insulin receptor			MLLT4	myeloid/lymphoid or mixed-lineage leukemia (trithorax homolog, Drosophila); translocated to, 4	CHST3	carbohydrate (chondroitin 6) sulfotransferase 3	FNBP1	formin binding protein 1
				PCDH19	protocadherin 19					SUB1	SUB1 homolog (S. cerevisiae)	D4S234E	DNA segment on chromosome 4 (unique) 234 expressed sequence	CNOT6	CCR4-NOT transcription complex, subunit 6	ZFPM2	zinc finger protein, multitype 2			CUGBP2	CUG triplet repeat, RNA binding protein 2	USP3	ubiquitin specific peptidase 3	TMPRSS7	transmembrane protease, serine 7
				ITGB3	integrin, beta 3 (platelet glycoprotein IIIa, antigen CD61)					FNDC3B	fibronectin type III domain containing 3B	C1orf135	chromosome 1 open reading frame 135	FAM69A	family with sequence similarity 69, member A	NRCAM	neuronal cell adhesion molecule			CHODL	chondrolectin	SLC35A3	solute carrier family 35 (UDP-N-acetylglucosamine (UDP-GlcNAc) transporter), member A3	CACNA1A	calcium channel, voltage-dependent, P/Q type, alpha 1A subunit
				MLL2	myeloid/lymphoid or mixed-lineage leukemia 2					C5orf30	chromosome 5 open reading frame 30	PNKD	paroxysmal nonkinesigenic dyskinesia	HIP1	huntingtin interacting protein 1	CDCP1	CUB domain containing protein 1			NUDT10	nudix (nucleoside diphosphate linked moiety X)-type motif 10	TMEM2	transmembrane protein 2	MED14	mediator complex subunit 14
				ZNF516	zinc finger protein 516					ID4	inhibitor of DNA binding 4, dominant negative helix-loop-helix protein	ODZ3	odz, odd Oz/ten-m homolog 3 (Drosophila)	ABR	active BCR-related gene	ZC3H7A	zinc finger CCCH-type containing 7A			KIAA1486	KIAA1486 protein	DAPK1	death-associated protein kinase 1	C17orf85	chromosome 17 open reading frame 85
				RAG1	recombination activating gene 1					ADRBK2	adrenergic, beta, receptor kinase 2	JAKMIP2	janus kinase and microtubule interacting protein 2	DNAI1	dynein, axonemal, intermediate chain 1	LOC203547	hypothetical protein LOC203547			VAPA	VAMP (vesicle-associated membrane protein)-associated protein A, 33kDa	TMEM86A	transmembrane protein 86A	PPP1CC	protein phosphatase 1, catalytic subunit, gamma isoform
				KLF9	Kruppel-like factor 9					NTF3	neurotrophin 3	IFNAR2	interferon (alpha, beta and omega) receptor 2	SEC63	SEC63 homolog (S. cerevisiae)	CHUK	conserved helix-loop-helix ubiquitous kinase			C5orf33	chromosome 5 open reading frame 33	GOLGA3	golgi autoantigen, golgin subfamily a, 3	PAIP2	poly(A) binding protein interacting protein 2
				RNF5	ring finger protein 5					TMTC1	transmembrane and tetratricopeptide repeat containing 1	ACTC1	actin, alpha, cardiac muscle 1	TBK1	TANK-binding kinase 1	ZFP161	zinc finger protein 161 homolog (mouse)			PKNOX1	PBX/knotted 1 homeobox 1	HOXA9	homeobox A9	AKIRIN1	akirin 1
				BTBD3	BTB (POZ) domain containing 3					ATRN	attractin	GOLGA1	golgi autoantigen, golgin subfamily a, 1	FLJ20309	hypothetical protein FLJ20309	CBX2	chromobox homolog 2 (Pc class homolog, Drosophila)			GLTSCR1	glioma tumor suppressor candidate region gene 1	VGLL4	vestigial like 4 (Drosophila)	SERBP1	SERPINE1 mRNA binding protein 1
				C1orf26	chromosome 1 open reading frame 26					ONECUT2	one cut homeobox 2	SHOC2	soc-2 suppressor of clear homolog (C. elegans)	SDC1	syndecan 1	BICD2	bicaudal D homolog 2 (Drosophila)			MEIS1	Meis homeobox 1	TWF1	twinfilin, actin-binding protein, homolog 1 (Drosophila)	GLTP	glycolipid transfer protein
				GTF2I	general transcription factor II, i					THRB	thyroid hormone receptor, beta (erythroblastic leukemia viral (v-erb-a) oncogene homolog 2, avian)	GALR1	galanin receptor 1	RBM9	RNA binding motif protein 9	ACVR2A	activin A receptor, type IIA			FLJ20160	FLJ20160 protein	SLC9A2	solute carrier family 9 (sodium/hydrogen exchanger), member 2	RAP2B	RAP2B, member of RAS oncogene family
				WDR37	WD repeat domain 37					VEGFC	vascular endothelial growth factor C	SCARA5	scavenger receptor class A, member 5 (putative)	FBXL11	F-box and leucine-rich repeat protein 11	UNC13B	unc-13 homolog B (C. elegans)			RP5-1022P6.2	hypothetical protein KIAA1434	MAN1A2	mannosidase, alpha, class 1A, member 2	KIAA1553	KIAA1553
				ZC3H3	zinc finger CCCH-type containing 3					PTCHD1	patched domain containing 1	KIAA0423	KIAA0423	DOCK3	dedicator of cytokinesis 3	AAK1	AP2 associated kinase 1			SNX9	sorting nexin 9	ZCCHC24	zinc finger, CCHC domain containing 24	GDF6	growth differentiation factor 6
				NKD1	naked cuticle homolog 1 (Drosophila)					PFDN4	prefoldin subunit 4	GLDC	glycine dehydrogenase (decarboxylating)	NUDT13	nudix (nucleoside diphosphate linked moiety X)-type motif 13	OSBPL11	oxysterol binding protein-like 11			ADRB1	adrenergic, beta-1-, receptor	NUDT11	nudix (nucleoside diphosphate linked moiety X)-type motif 11	PEG10	paternally expressed 10
				CD86	CD86 molecule					RBX1	ring-box 1	R3HDM1	R3H domain containing 1	CCM2	cerebral cavernous malformation 2	SLC7A2	solute carrier family 7 (cationic amino acid transporter, y+ system), member 2			GPR85	G protein-coupled receptor 85	SSH2	slingshot homolog 2 (Drosophila)	ERG	v-ets erythroblastosis virus E26 oncogene homolog (avian)
				RNF165	ring finger protein 165					ANKH	ankylosis, progressive homolog (mouse)	CCDC43	coiled-coil domain containing 43	FKBP15	FK506 binding protein 15, 133kDa	FAM172A	family with sequence similarity 172, member A			FBXO11	F-box protein 11	BCL7B	B-cell CLL/lymphoma 7B	MAP1B	microtubule-associated protein 1B
				PCGF3	polycomb group ring finger 3					FAM129B	family with sequence similarity 129, member B	EPC2	enhancer of polycomb homolog 2 (Drosophila)	TBC1D25	TBC1 domain family, member 25	YTHDF1	YTH domain family, member 1			MED14	mediator complex subunit 14	IPPK	inositol 1,3,4,5,6-pentakisphosphate 2-kinase	EFHA2	EF-hand domain family, member A2
				ERCC4	excision repair cross-complementing rodent repair deficiency, complementation group 4					RPS6KA3	ribosomal protein S6 kinase, 90kDa, polypeptide 3	YTHDC1	YTH domain containing 1	BACE1	beta-site APP-cleaving enzyme 1	KIAA1632	KIAA1632			SLC4A8	solute carrier family 4, sodium bicarbonate cotransporter, member 8	ZFHX4	zinc finger homeobox 4	POLR3G	polymerase (RNA) III (DNA directed) polypeptide G (32kD)
				USP32	ubiquitin specific peptidase 32					BAZ1B	bromodomain adjacent to zinc finger domain, 1B	AMOTL1	angiomotin like 1	SMOC2	SPARC related modular calcium binding 2	PURA	purine-rich element binding protein A			USP24	ubiquitin specific peptidase 24	ZNF275	zinc finger protein 275	DCP2	DCP2 decapping enzyme homolog (S. cerevisiae)
				PXDN	peroxidasin homolog (Drosophila)					PDGFRA	platelet-derived growth factor receptor, alpha polypeptide	ABCC9	ATP-binding cassette, sub-family C (CFTR/MRP), member 9	RNF19A	ring finger protein 19A	GCC2	GRIP and coiled-coil domain containing 2			PTPN11	protein tyrosine phosphatase, non-receptor type 11 (Noonan syndrome 1)	MKNK2	MAP kinase interacting serine/threonine kinase 2	LIN7C	lin-7 homolog C (C. elegans)
				GDPD1	glycerophosphodiester phosphodiesterase domain containing 1					CIT	citron (rho-interacting, serine/threonine kinase 21)	PLAGL2	pleiomorphic adenoma gene-like 2	WDR1	WD repeat domain 1	GRB2	growth factor receptor-bound protein 2			RUFY3	RUN and FYVE domain containing 3	GRSF1	G-rich RNA sequence binding factor 1	KIF3A	kinesin family member 3A
				TMEM143	transmembrane protein 143					MLL3	myeloid/lymphoid or mixed-lineage leukemia 3	PPP3R1	protein phosphatase 3 (formerly 2B), regulatory subunit B, alpha isoform	ZDHHC18	zinc finger, DHHC-type containing 18	BANP	BTG3 associated nuclear protein			GRID1	glutamate receptor, ionotropic, delta 1	PCDH18	protocadherin 18	YWHAB	tyrosine 3-monooxygenase/tryptophan 5-monooxygenase activation protein, beta polypeptide
				ANKRD28	ankyrin repeat domain 28					CAMTA1	calmodulin binding transcription activator 1	ME1	malic enzyme 1, NADP(+)-dependent, cytosolic	HDLBP	high density lipoprotein binding protein	PRTG	protogenin homolog (Gallus gallus)			ZNF238	zinc finger protein 238	PDE4D	phosphodiesterase 4D, cAMP-specific (phosphodiesterase E3 dunce homolog, Drosophila)	VPS26B	vacuolar protein sorting 26 homolog B (S. pombe)
				PLEKHO1	pleckstrin homology domain containing, family O member 1					ARFGAP3	ADP-ribosylation factor GTPase activating protein 3	SLC41A2	solute carrier family 41, member 2	SLC8A1	solute carrier family 8 (sodium/calcium exchanger), member 1	AKIRIN2	akirin 2			CBX3	chromobox homolog 3 (HP1 gamma homolog, Drosophila)	CNR1	cannabinoid receptor 1 (brain)	CLCN5	chloride channel 5 (nephrolithiasis 2, X-linked, Dent disease)
				CCDC100	coiled-coil domain containing 100					JAZF1	JAZF zinc finger 1	REEP1	receptor accessory protein 1	DDEF2	development and differentiation enhancing factor 2	TMEM194A	transmembrane protein 194A			STK38L	serine/threonine kinase 38 like	SACS	spastic ataxia of Charlevoix-Saguenay (sacsin)	CALD1	caldesmon 1
				A2BP1	ataxin 2-binding protein 1					MTSS1	metastasis suppressor 1	CAMK2D	calcium/calmodulin-dependent protein kinase (CaM kinase) II delta	ATP2C1	ATPase, Ca++ transporting, type 2C, member 1	GRP	gastrin-releasing peptide			KLHL28	kelch-like 28 (Drosophila)	PIM1	pim-1 oncogene	STX16	syntaxin 16
				PPAPDC2	phosphatidic acid phosphatase type 2 domain containing 2					OXR1	oxidation resistance 1	CLN8	ceroid-lipofuscinosis, neuronal 8 (epilepsy, progressive with mental retardation)	GRK6	G protein-coupled receptor kinase 6	NPTX1	neuronal pentraxin I			HMGB2	high-mobility group box 2	KIAA1754	KIAA1754	PLXND1	plexin D1
				IKZF2	IKAROS family zinc finger 2 (Helios)					SLC25A12	solute carrier family 25 (mitochondrial carrier, Aralar), member 12	MYO5A	myosin VA (heavy chain 12, myoxin)	DHX40	DEAH (Asp-Glu-Ala-His) box polypeptide 40	TMEM66	transmembrane protein 66			KLF15	Kruppel-like factor 15	PCNX	pecanex homolog (Drosophila)	USP46	ubiquitin specific peptidase 46
				LCORL	ligand dependent nuclear receptor corepressor-like					ZFPM2	zinc finger protein, multitype 2	TMEFF1	transmembrane protein with EGF-like and two follistatin-like domains 1	REEP3	receptor accessory protein 3	EN1	engrailed homeobox 1			ITGB8	integrin, beta 8	LARP5	La ribonucleoprotein domain family, member 5	C1orf83	chromosome 1 open reading frame 83
				hCG_18385	similar to cAMP-regulated phosphoprotein					CD82	CD82 molecule	ITGA4	integrin, alpha 4 (antigen CD49D, alpha 4 subunit of VLA-4 receptor)	ZNF445	zinc finger protein 445	SPOPL	speckle-type POZ protein-like			PDE4D	phosphodiesterase 4D, cAMP-specific (phosphodiesterase E3 dunce homolog, Drosophila)	BHLHB2	basic helix-loop-helix domain containing, class B, 2	BAK1	BCL2-antagonist/killer 1
				SLC5A6	solute carrier family 5 (sodium-dependent vitamin transporter), member 6					MLL4	myeloid/lymphoid or mixed-lineage leukemia 4	FAM73B	family with sequence similarity 73, member B	RAP1A	RAP1A, member of RAS oncogene family	FAM110A	family with sequence similarity 110, member A			C20orf194	chromosome 20 open reading frame 194	PPP1R3D	protein phosphatase 1, regulatory (inhibitor) subunit 3D	C5orf13	chromosome 5 open reading frame 13
				FAM135A	family with sequence similarity 135, member A					ATRX	alpha thalassemia/mental retardation syndrome X-linked (RAD54 homolog, S. cerevisiae)	C12orf30	chromosome 12 open reading frame 30	SUZ12	suppressor of zeste 12 homolog (Drosophila)	PEX13	peroxisome biogenesis factor 13			PFKFB2	6-phosphofructo-2-kinase/fructose-2,6-biphosphatase 2	RASGEF1A	RasGEF domain family, member 1A	VAV2	vav 2 guanine nucleotide exchange factor
				CREM	cAMP responsive element modulator					SAFB	scaffold attachment factor B	CYYR1	cysteine/tyrosine-rich 1	ATRX	alpha thalassemia/mental retardation syndrome X-linked (RAD54 homolog, S. cerevisiae)	WNT5A	wingless-type MMTV integration site family, member 5A			SUPT16H	suppressor of Ty 16 homolog (S. cerevisiae)	C10orf137	chromosome 10 open reading frame 137	GZF1	GDNF-inducible zinc finger protein 1
				PLAGL2	pleiomorphic adenoma gene-like 2					ZNF609	zinc finger protein 609	SGCB	sarcoglycan, beta (43kDa dystrophin-associated glycoprotein)	MACF1	microtubule-actin crosslinking factor 1	HELZ	helicase with zinc finger			AQP2	aquaporin 2 (collecting duct)	PJA2	praja 2, RING-H2 motif containing	KIAA1147	KIAA1147
				USP24	ubiquitin specific peptidase 24					NR1D1	nuclear receptor subfamily 1, group D, member 1	NRXN3	neurexin 3	SNX18	sorting nexin 18	R3HDM2	R3H domain containing 2			KPNA3	karyopherin alpha 3 (importin alpha 4)	BCL11A	B-cell CLL/lymphoma 11A (zinc finger protein)	ADAMTS10	ADAM metallopeptidase with thrombospondin type 1 motif, 10
				THOC2	THO complex 2					ING5	inhibitor of growth family, member 5	TRPM7	transient receptor potential cation channel, subfamily M, member 7	SFRS6	splicing factor, arginine/serine-rich 6	PLXDC1	plexin domain containing 1			PAM	peptidylglycine alpha-amidating monooxygenase	CREBBP	CREB binding protein (Rubinstein-Taybi syndrome)	SESN2	sestrin 2
				SMCR8	Smith-Magenis syndrome chromosome region, candidate 8					TBX2	T-box 2	WDR26	WD repeat domain 26	HECTD3	HECT domain containing 3	SLC39A14	solute carrier family 39 (zinc transporter), member 14			ADAMTSL1	ADAMTS-like 1	HOXC9	homeobox C9	KIAA0146	KIAA0146
				SPRYD4	SPRY domain containing 4					AMMECR1L	AMME chromosomal region gene 1-like	CDC37L1	cell division cycle 37 homolog (S. cerevisiae)-like 1	ERBB4	v-erb-a erythroblastic leukemia viral oncogene homolog 4 (avian)	TRIP12	thyroid hormone receptor interactor 12			MAP1B	microtubule-associated protein 1B	PPP3CB	protein phosphatase 3 (formerly 2B), catalytic subunit, beta isoform	UNC13C	unc-13 homolog C (C. elegans)
				C3orf52	chromosome 3 open reading frame 52					NCOA3	nuclear receptor coactivator 3	DCUN1D3	DCN1, defective in cullin neddylation 1, domain containing 3 (S. cerevisiae)	CCND1	cyclin D1	CD2AP	CD2-associated protein			KIAA1715	KIAA1715	CCNJ	cyclin J	C18orf1	chromosome 18 open reading frame 1
				TMED5	transmembrane emp24 protein transport domain containing 5					ERO1L	ERO1-like (S. cerevisiae)	MCF2L	MCF.2 cell line derived transforming sequence-like	ITGA6	integrin, alpha 6	KIAA0831	KIAA0831			CDKN2B	cyclin-dependent kinase inhibitor 2B (p15, inhibits CDK4)	CSNK1G1	casein kinase 1, gamma 1	PDPN	podoplanin
				COL24A1	collagen, type XXIV, alpha 1					NSF	N-ethylmaleimide-sensitive factor	ADAM9	ADAM metallopeptidase domain 9 (meltrin gamma)	BTF3L4	basic transcription factor 3-like 4	HNRNPK	heterogeneous nuclear ribonucleoprotein K			HNRPDL	heterogeneous nuclear ribonucleoprotein D-like	HOXD13	homeobox D13	NRP2	neuropilin 2
				HDLBP	high density lipoprotein binding protein					CDON	Cdon homolog (mouse)	ZBTB39	zinc finger and BTB domain containing 39	PRRT3	proline-rich transmembrane protein 3	MEPCE	methylphosphate capping enzyme			ANKRD17	ankyrin repeat domain 17	YTHDF3	YTH domain family, member 3	FOXN4	forkhead box N4
				POU2F2	POU class 2 homeobox 2					C12orf34	chromosome 12 open reading frame 34	ARID4A	AT rich interactive domain 4A (RBP1-like)	RALGPS1	Ral GEF with PH domain and SH3 binding motif 1	USP7	ubiquitin specific peptidase 7 (herpes virus-associated)			NFASC	neurofascin homolog (chicken)	PSD3	pleckstrin and Sec7 domain containing 3	FOXP2	forkhead box P2
				CPD	carboxypeptidase D					MBNL2	muscleblind-like 2 (Drosophila)	GNG10	guanine nucleotide binding protein (G protein), gamma 10	KRAS	v-Ki-ras2 Kirsten rat sarcoma viral oncogene homolog	SHANK2	SH3 and multiple ankyrin repeat domains 2			ATAD2B	ATPase family, AAA domain containing 2B	CPM	carboxypeptidase M	GATA2	GATA binding protein 2
				BCAP29	B-cell receptor-associated protein 29					TANC2	tetratricopeptide repeat, ankyrin repeat and coiled-coil containing 2	LOC552891	hypothetical protein LOC552891	KIAA1553	KIAA1553	KIAA1486	KIAA1486 protein			CAPRIN2	caprin family member 2	GPC4	glypican 4	BMI1	BMI1 polycomb ring finger oncogene
				LGR4	leucine-rich repeat-containing G protein-coupled receptor 4					IMPAD1	inositol monophosphatase domain containing 1	C1orf173	chromosome 1 open reading frame 173	MRPL17	mitochondrial ribosomal protein L17	CNGB3	cyclic nucleotide gated channel beta 3			BACH2	BTB and CNC homology 1, basic leucine zipper transcription factor 2	FAM118A	family with sequence similarity 118, member A	MEPCE	methylphosphate capping enzyme
				DCUN1D3	DCN1, defective in cullin neddylation 1, domain containing 3 (S. cerevisiae)					ITCH	itchy E3 ubiquitin protein ligase homolog (mouse)	PIK3CD	phosphoinositide-3-kinase, catalytic, delta polypeptide	FRMD6	FERM domain containing 6	PANK1	pantothenate kinase 1			LOC399947	similar to expressed sequence AI593442	CEP68	centrosomal protein 68kDa	SLC5A3	solute carrier family 5 (inositol transporters), member 3
				SLC31A1	solute carrier family 31 (copper transporters), member 1					UBE2G1	ubiquitin-conjugating enzyme E2G 1 (UBC7 homolog, yeast)	ESCO1	establishment of cohesion 1 homolog 1 (S. cerevisiae)	GPR137B	G protein-coupled receptor 137B	SPRED1	sprouty-related, EVH1 domain containing 1			CEP57	centrosomal protein 57kDa	TNPO1	transportin 1	MYH10	myosin, heavy chain 10, non-muscle
				BRD3	bromodomain containing 3					KLF11	Kruppel-like factor 11	CEP350	centrosomal protein 350kDa	SEL1L	sel-1 suppressor of lin-12-like (C. elegans)	SMAD7	SMAD family member 7			GPR56	G protein-coupled receptor 56	USP25	ubiquitin specific peptidase 25	ELFN2	extracellular leucine-rich repeat and fibronectin type III domain containing 2
				POLR3D	polymerase (RNA) III (DNA directed) polypeptide D, 44kDa					VAPB	VAMP (vesicle-associated membrane protein)-associated protein B and C	HOXA1	homeobox A1	WNK1	WNK lysine deficient protein kinase 1	C11orf41	chromosome 11 open reading frame 41			LRRTM3	leucine rich repeat transmembrane neuronal 3	ADAMTS19	ADAM metallopeptidase with thrombospondin type 1 motif, 19	MAGI2	membrane associated guanylate kinase, WW and PDZ domain containing 2
				ZNF697	zinc finger protein 697					C12orf51	chromosome 12 open reading frame 51	WWP1	WW domain containing E3 ubiquitin protein ligase 1	PCDHAC1	protocadherin alpha subfamily C, 1	GRIK2	glutamate receptor, ionotropic, kainate 2			FNDC3B	fibronectin type III domain containing 3B	PTER	phosphotriesterase related	RNF182	ring finger protein 182
				SEC14L1	SEC14-like 1 (S. cerevisiae)					RAPGEF5	Rap guanine nucleotide exchange factor (GEF) 5	GCNT2	glucosaminyl (N-acetyl) transferase 2, I-branching enzyme (I blood group)	PCDHAC2	protocadherin alpha subfamily C, 2	MLL2	myeloid/lymphoid or mixed-lineage leukemia 2			RBMS3	RNA binding motif, single stranded interacting protein	BHLHB5	basic helix-loop-helix domain containing, class B, 5	SFRS2IP	splicing factor, arginine/serine-rich 2, interacting protein
				PBX2	pre-B-cell leukemia homeobox 2					GATA2	GATA binding protein 2	2010-03-06	membrane-associated ring finger (C3HC4) 6	PCDHA1	protocadherin alpha 1	TOX4	TOX high mobility group box family member 4			MKRN2	makorin, ring finger protein, 2	NCOA4	nuclear receptor coactivator 4	NCAM1	neural cell adhesion molecule 1
				RAB22A	RAB22A, member RAS oncogene family					SPOP	speckle-type POZ protein	MLL	myeloid/lymphoid or mixed-lineage leukemia (trithorax homolog, Drosophila)	PCDHA10	protocadherin alpha 10	MYB	v-myb myeloblastosis viral oncogene homolog (avian)			USP6	ubiquitin specific peptidase 6 (Tre-2 oncogene)	PPP3R1	protein phosphatase 3 (formerly 2B), regulatory subunit B, alpha isoform	HNF4G	hepatocyte nuclear factor 4, gamma
				GALNT2	UDP-N-acetyl-alpha-D-galactosamine:polypeptide N-acetylgalactosaminyltransferase 2 (GalNAc-T2)					KIF3A	kinesin family member 3A	MIA3	melanoma inhibitory activity family, member 3	PCDHA11	protocadherin alpha 11	KCMF1	potassium channel modulatory factor 1			NUFIP2	nuclear fragile X mental retardation protein interacting protein 2	C12orf51	chromosome 12 open reading frame 51	MGC24039	hypothetical protein MGC24039
				HABP4	hyaluronan binding protein 4					MARCKS	myristoylated alanine-rich protein kinase C substrate	FAM40A	family with sequence similarity 40, member A	PCDHA12	protocadherin alpha 12	MYT1L	myelin transcription factor 1-like			RNF125	ring finger protein 125	RP2	retinitis pigmentosa 2 (X-linked recessive)	SFRS18	splicing factor, arginine/serine-rich 18
				C15orf29	chromosome 15 open reading frame 29					GOLGA2	golgi autoantigen, golgin subfamily a, 2	RAB22A	RAB22A, member RAS oncogene family	PCDHA13	protocadherin alpha 13	QKI	quaking homolog, KH domain RNA binding (mouse)			HNRNPUL2	heterogeneous nuclear ribonucleoprotein U-like 2	ADAMTS18	ADAM metallopeptidase with thrombospondin type 1 motif, 18	EBF3	early B-cell factor 3
				SCYL3	SCY1-like 3 (S. cerevisiae)					NRP1	neuropilin 1	STAC	SH3 and cysteine rich domain	PCDHA2	protocadherin alpha 2	TSC1	tuberous sclerosis 1			C20orf117	chromosome 20 open reading frame 117	DYRK1A	dual-specificity tyrosine-(Y)-phosphorylation regulated kinase 1A	UBE2NL	ubiquitin-conjugating enzyme E2N-like
				ARPP-19	cyclic AMP phosphoprotein, 19 kD					CCDC128	coiled-coil domain containing 128	ARHGEF6	Rac/Cdc42 guanine nucleotide exchange factor (GEF) 6	PCDHA3	protocadherin alpha 3	RNF125	ring finger protein 125			ELF5	E74-like factor 5 (ets domain transcription factor)	DLG4	discs, large homolog 4 (Drosophila)	NXT2	nuclear transport factor 2-like export factor 2
				MEIS3	Meis homeobox 3					MYCN	v-myc myelocytomatosis viral related oncogene, neuroblastoma derived (avian)	UNC5C	unc-5 homolog C (C. elegans)	PCDHA4	protocadherin alpha 4	LMO7	LIM domain 7			RAB11FIP1	RAB11 family interacting protein 1 (class I)	ANKIB1	ankyrin repeat and IBR domain containing 1	FBXO33	F-box protein 33
				MOBKL3	MOB1, Mps One Binder kinase activator-like 3 (yeast)					CRISPLD2	cysteine-rich secretory protein LCCL domain containing 2	CYB561	cytochrome b-561	PCDHA5	protocadherin alpha 5	TACC1	transforming, acidic coiled-coil containing protein 1			EFNB3	ephrin-B3	CREBL2	cAMP responsive element binding protein-like 2	GNG12	guanine nucleotide binding protein (G protein), gamma 12
				DUSP1	dual specificity phosphatase 1					BEX2	brain expressed X-linked 2	LOC283871	hypothetical protein LOC283871	PCDHA6	protocadherin alpha 6	PRKCE	protein kinase C, epsilon			R3HDM2	R3H domain containing 2	WNK1	WNK lysine deficient protein kinase 1	ST14	suppression of tumorigenicity 14 (colon carcinoma)
				ADRBK2	adrenergic, beta, receptor kinase 2					PJA2	praja 2, RING-H2 motif containing	JPH4	junctophilin 4	PCDHA7	protocadherin alpha 7	EPHB1	EPH receptor B1			GRIA4	glutamate receptor, ionotrophic, AMPA 4	ERLIN1	ER lipid raft associated 1	CDH5	cadherin 5, type 2, VE-cadherin (vascular epithelium)
				SCN4B	sodium channel, voltage-gated, type IV, beta					RGMB	RGM domain family, member B	RAP1B	RAP1B, member of RAS oncogene family	PCDHA8	protocadherin alpha 8	MIPOL1	mirror-image polydactyly 1			SHANK2	SH3 and multiple ankyrin repeat domains 2	PPM1H	protein phosphatase 1H (PP2C domain containing)	UBE2N	ubiquitin-conjugating enzyme E2N (UBC13 homolog, yeast)
				NTN1	netrin 1					FUSIP1	FUS interacting protein (serine/arginine-rich) 1	SNAI1	snail homolog 1 (Drosophila)	PKNOX1	PBX/knotted 1 homeobox 1	SMPD3	sphingomyelin phosphodiesterase 3, neutral membrane (neutral sphingomyelinase II)			XYLT1	xylosyltransferase I	DMXL1	Dmx-like 1	FOXO1	forkhead box O1
				STEAP3	STEAP family member 3					LIN54	lin-54 homolog (C. elegans)	CD2AP	CD2-associated protein	LY75	lymphocyte antigen 75	PRDM15	PR domain containing 15			FUSIP1	FUS interacting protein (serine/arginine-rich) 1	FAM45A	family with sequence similarity 45, member A	FOSB	FBJ murine osteosarcoma viral oncogene homolog B
				CPEB4	cytoplasmic polyadenylation element binding protein 4					MTMR12	myotubularin related protein 12	NDEL1	nudE nuclear distribution gene E homolog (A. nidulans)-like 1	RNF167	ring finger protein 167	EN2	engrailed homeobox 2			KRAS	v-Ki-ras2 Kirsten rat sarcoma viral oncogene homolog	SOCS6	suppressor of cytokine signaling 6	SHROOM2	shroom family member 2
				KIAA0574	KIAA0574 protein					LRP1	low density lipoprotein-related protein 1 (alpha-2-macroglobulin receptor)	DNAJC13	DnaJ (Hsp40) homolog, subfamily C, member 13	OTUD7B	OTU domain containing 7B	ATG2B	ATG2 autophagy related 2 homolog B (S. cerevisiae)			ARNT	aryl hydrocarbon receptor nuclear translocator	DMD	dystrophin (muscular dystrophy, Duchenne and Becker types)	PDE8B	phosphodiesterase 8B
				LMX1A	LIM homeobox transcription factor 1, alpha					MAPK1	mitogen-activated protein kinase 1	GNAI2	guanine nucleotide binding protein (G protein), alpha inhibiting activity polypeptide 2	CNTFR	ciliary neurotrophic factor receptor	SMAD5	SMAD family member 5			PGAM1	phosphoglycerate mutase 1 (brain)	SLC1A1	solute carrier family 1 (neuronal/epithelial high affinity glutamate transporter, system Xag), member 1	BRSK1	BR serine/threonine kinase 1
				MEIS2	Meis homeobox 2					WASF1	WAS protein family, member 1	ELL2	elongation factor, RNA polymerase II, 2	FIBIN	fin bud initiation factor	SYP	synaptophysin			RABEP1	rabaptin, RAB GTPase binding effector protein 1	CHIC1	cysteine-rich hydrophobic domain 1	TBC1D4	TBC1 domain family, member 4
				CLASP2	cytoplasmic linker associated protein 2					DDX5	DEAD (Asp-Glu-Ala-Asp) box polypeptide 5	2010-09-07	septin 7	GRIN2A	glutamate receptor, ionotropic, N-methyl D-aspartate 2A	PNPO	pyridoxamine 5'-phosphate oxidase			JPH1	junctophilin 1	SLC7A6	solute carrier family 7 (cationic amino acid transporter, y+ system), member 6	AMOTL1	angiomotin like 1
				DAGLA	diacylglycerol lipase, alpha					ZCCHC24	zinc finger, CCHC domain containing 24	EPB41	erythrocyte membrane protein band 4.1 (elliptocytosis 1, RH-linked)	FOXP1	forkhead box P1	APPL1	adaptor protein, phosphotyrosine interaction, PH domain and leucine zipper containing 1			EVI1	ecotropic viral integration site 1	ARL5B	ADP-ribosylation factor-like 5B	HAPLN1	hyaluronan and proteoglycan link protein 1
				WASL	Wiskott-Aldrich syndrome-like					EN2	engrailed homeobox 2	CBFB	core-binding factor, beta subunit	VPS37A	vacuolar protein sorting 37 homolog A (S. cerevisiae)	GAB2	GRB2-associated binding protein 2			SORT1	sortilin 1	MAP1B	microtubule-associated protein 1B	HMGCS1	3-hydroxy-3-methylglutaryl-Coenzyme A synthase 1 (soluble)
				FNDC3B	fibronectin type III domain containing 3B					PTPN11	protein tyrosine phosphatase, non-receptor type 11 (Noonan syndrome 1)	CAPZA1	capping protein (actin filament) muscle Z-line, alpha 1	VAMP3	vesicle-associated membrane protein 3 (cellubrevin)	NTNG1	netrin G1			PRR15	proline rich 15	DNAJB5	DnaJ (Hsp40) homolog, subfamily B, member 5	TFAP2B	transcription factor AP-2 beta (activating enhancer binding protein 2 beta)
				GOLGA4	golgi autoantigen, golgin subfamily a, 4					DLX6	distal-less homeobox 6	CECR2	cat eye syndrome chromosome region, candidate 2	FAM168A	family with sequence similarity 168, member A	GGA3	golgi associated, gamma adaptin ear containing, ARF binding protein 3			ARX	aristaless related homeobox	CAMSAP1	calmodulin regulated spectrin-associated protein 1	TET1	tet oncogene 1
				IPO9	importin 9					TTC39B	tetratricopeptide repeat domain 39B	SLC7A10	solute carrier family 7, (neutral amino acid transporter, y+ system) member 10	ARIH2	ariadne homolog 2 (Drosophila)	UBE4B	ubiquitination factor E4B (UFD2 homolog, yeast)			ARL8A	ADP-ribosylation factor-like 8A	GTF3C2	general transcription factor IIIC, polypeptide 2, beta 110kDa	RNF144A	ring finger protein 144A
				MTUS1	mitochondrial tumor suppressor 1					PDGFA	platelet-derived growth factor alpha polypeptide	DPY19L3	dpy-19-like 3 (C. elegans)	C3orf64	chromosome 3 open reading frame 64	FAM5C	family with sequence similarity 5, member C			TBX18	T-box 18	ZDHHC18	zinc finger, DHHC-type containing 18	VAV3	vav 3 guanine nucleotide exchange factor
				EFHD2	EF-hand domain family, member D2					PDIK1L	PDLIM1 interacting kinase 1 like	NUS1	nuclear undecaprenyl pyrophosphate synthase 1 homolog (S. cerevisiae)	KIAA2013	KIAA2013	DPYSL2	dihydropyrimidinase-like 2			TOP1	topoisomerase (DNA) I	MTPN	myotrophin	ATP11C	ATPase, class VI, type 11C
				ZPLD1	zona pellucida-like domain containing 1					SEPHS1	selenophosphate synthetase 1	RNF220	ring finger protein 220	ANXA7	annexin A7	MIP	major intrinsic protein of lens fiber			LARP4	La ribonucleoprotein domain family, member 4	MLL3	myeloid/lymphoid or mixed-lineage leukemia 3	STX6	syntaxin 6
				UHRF1	ubiquitin-like, containing PHD and RING finger domains, 1					GRIA4	glutamate receptor, ionotrophic, AMPA 4	CSNK1A1	casein kinase 1, alpha 1	LYCAT	lysocardiolipin acyltransferase	MAF	v-maf musculoaponeurotic fibrosarcoma oncogene homolog (avian)			ATRX	alpha thalassemia/mental retardation syndrome X-linked (RAD54 homolog, S. cerevisiae)	RCOR1	REST corepressor 1	C10orf114	chromosome 10 open reading frame 114
				MYCBP	c-myc binding protein					OCIAD1	OCIA domain containing 1	PTPDC1	protein tyrosine phosphatase domain containing 1	SERINC3	serine incorporator 3	KIF21B	kinesin family member 21B			MTMR2	myotubularin related protein 2	RTN1	reticulon 1	FAM84B	family with sequence similarity 84, member B
				SLC4A4	solute carrier family 4, sodium bicarbonate cotransporter, member 4					TPRG1	tumor protein p63 regulated 1	CAMK4	calcium/calmodulin-dependent protein kinase IV	CD164	CD164 molecule, sialomucin	C3orf64	chromosome 3 open reading frame 64			C1orf21	chromosome 1 open reading frame 21	C11orf41	chromosome 11 open reading frame 41	NRBF2	nuclear receptor binding factor 2
				C7orf58	chromosome 7 open reading frame 58					QKI	quaking homolog, KH domain RNA binding (mouse)	SEMA3A	sema domain, immunoglobulin domain (Ig), short basic domain, secreted, (semaphorin) 3A	FLNC	filamin C, gamma (actin binding protein 280)	AP3M2	adaptor-related protein complex 3, mu 2 subunit			PRDM16	PR domain containing 16	ITGA5	integrin, alpha 5 (fibronectin receptor, alpha polypeptide)	PTGFRN	prostaglandin F2 receptor negative regulator
[truncated: 679 more rows]
