# Supplementary material for: Identification of microRNAs Involved in the Host Response to Enterovirus 71 Infection by a Deep Sequencing Approach
Source: Hindawi journal article supplement (doi:10.1155/2010/425939), 2010-01-01
Supplement: f2 [file 425939.f2.xls]

## Sheet: Sheet1
#Term	Genes	N? of genes	Percentage
GO:0044238	RB1,HABP4,CLOCK,RAD23B,TBX15,UBE2E2,NDST1,ACVR2A,HLF,CRKRS,SLC7A2,ARID2,DLAT,PRDM12,MOBKL1A,GPAM,GLT25D2,OSBPL11,MGLL,DAG1,EN1,PPP1CB,BTRC,ST8SIA1,FBXL7,LBA1,SOX11,ASPH,PKNOX1,CDC6,RFXDC2,GPD1,TIAL1,IKBKE,SIN3A,PRKAG2,B3GAT1,CLN8,SUPT6H,KCNIP3,PDGFB,CILP,AZIN1,ASH2L,SUPT3H,YBX1,HMGCR,RABL3,POLH,EDN1,ESRRA,ST3GAL6,ITGB8,AFF3,MARK4,RBPJ,EIF2B1,NLK,MYT1,B4GALT3,KLF13,FBXL12,TRIOBP,RBM17,FOXF2,MNT,RN…	2223	57.21
GO:0044237	RB1,HABP4,CLOCK,RAD23B,TBX15,UBE2E2,NDST1,ACVR2A,HLF,CRKRS,SLC7A2,ARID2,DLAT,PRDM12,MOBKL1A,GPAM,GLT25D2,OSBPL11,MGLL,EN1,PPP1CB,BTRC,ST8SIA1,FBXL7,LBA1,RAPGEF5,SOX11,ASPH,PKNOX1,CDC6,RFXDC2,GPD1,TIAL1,IKBKE,SIN3A,PRKAG2,B3GAT1,CLN8,SUPT6H,KCNIP3,PDGFB,CILP,AZIN1,ASH2L,SUPT3H,YBX1,HMGCR,RABL3,POLH,EDN1,ESRRA,ST3GAL6,ITGB8,AFF3,MARK4,RBPJ,EIF2B1,NLK,MYT1,KLF13,FBXL12,TRIOBP,RBM17,FOXF2,MNT,RNF7,GC…	2218	57.08
GO:0043170	DNAJB9,PEX13,WNK3,PPP3CB,GEMIN7,PDSS2,CHD5,ANKRD17,TCF3,CDK8,PAPPA,NCKAP1L,ADRA1B,GALM,PRDM7,CDC14B,SAP18,SYT1,RBBP6,GRSF1,METAP1,PSKH1,STYK1,SALL1,SNRK,BCL9L,TDGF1,TCEAL1,CASP3,MAN1B1,SERTAD2,HDAC9,GSPT2,OLR1,UST,FOXN4,PTPRO,ZBTB43,RNF141,ABCC8,SOX7,USP53,WARS2,DNAJB12,TRPM7,TBX5,NFYB,SP6,CCNE2,EHF,GABPB2,EBF3,LCOR,SATB1,KLF4,GYS1,PNN,HS3ST3B1,NPAS2,PITX2,TLR4,HS2ST1,E2F7,AP2B1,IRS2,USP46,HYOU1,…	2004	51.57
GO:0050789	BHLHB3,MAPK8IP1,PPAP2B,ACVR1B,GRM1,TBC1D13,RTF1,SUZ12,BTK,PHF20,ZFYVE16,RECK,PPP1R12B,CDK5R1,HPGD,CEBPG,SSR1,NR1D1,HMGA1,ZHX2,AR,JUND,BBX,TARBP2,KLF11,ZBTB7A,SLC5A7,SCN5A,LYN,SLC12A6,PKHD1,MAF1,RGL1,MKL1,KPNA2,ZFX,MDFI,MAPT,NEK6,SUPT7L,CDC42BPG,SPRY4,POU4F1,DMRT3,SMAD1,HIPK3,HOXB2,ARFGEF1,MSH2,ELF2,CBFA2T3,ABHD2,HTRA3,DMTF1,GRHL2,AKT2,CDC25A,DLX5,DLG1,MAF,DUSP6,HOXA5,ZNF689,SYNGAP1,THBS1,PRDM1,AR…	1582	40.71
GO:0007154	ADORA2B,RAP2B,SHANK2,LYST,KCNH3,RAB33B,PPP1R2,CXCL14,PRKRIR,RAB37,TBC1D12,TAOK3,CD2AP,CAV1,ASB3,RND1,LIF,NPTX1,EFNB3,PRX,MARK1,TNFAIP3,SEMA3B,WASF2,KLF10,GRIK3,LANCL1,TMEM9B,ADRBK1,ANK1,RNF4,MAP3K7,PTGDR,NAB1,ENPP1,CCM2,SLC12A5,ASH1L,SNX10,RARB,MAP3K11,RBM9,NKIRAS2,GNG5,RALB,SPRY3,EPHA7,GRK6,TRHDE,HIPK2,GPR153,DGKG,MAP3K7IP2,MIB1,GABRB2,IQGAP1,CD28,CENTG1,DLGAP2,CENTD1,INSR,SH3KBP1,CASKIN1,GNAO1,…	1292	33.25
GO:0016043	TLK1,NTNG1,SYNPO,CBX2,SLIT2,NUP50,RAB1A,MAP1LC3A,RAB43,ARPC5,CARD10,PMAIP1,KIF11,SEPT7,WNT1,MYH11,TMSB10,PCNT,TAOK2,NOTCH1,AP3M1,BRCA1,NTF3,NRXN2,MRE11A,CHD3,SYP,PARD6B,SEMA6A,EPB41L1,HRH3,EIF2S1,SEMA3A,ANKHD1,WASF1,ALS2,UNC84B,HIRIP3,BDNF,EIF5,EFNA5,PLDN,ITGA7,SOCS7,TSPYL5,EIF4G2,SEC23A,TLX2,PCGF2,PEX11B,ATP7B,SH3BP4,SEC61A2,TNXB,SMARCD2,NPEPL1,BCOR,COG2,ROBO2,PRC1,SORBS1,SORT1,PREB,SYT7,GOLGA3,…	886	22.8
GO:0007275	HOXA9,RND1,LIF,HAND2,NPTX1,EFNB3,PRX,SEMA6B,SEMA3B,KLF10,ADRBK1,SIAH1,NAB1,PLXNB3,CCM2,ISL2,SPRY3,MYBL2,PHC2,HIPK2,ID4,SCMH1,IL1RAPL2,MIB1,CCNF,GRHL1,EVI1,PPARA,INSR,HOXA4,ESRRG,ANKH,ALPK3,GNAO1,LMO4,DPYSL5,FOS,MAFG,DVL3,STRBP,ONECUT1,CHST2,MEF2D,VANGL1,FZD8,PAX8,EREG,NR2F6,ZEB2,RPS6KA3,UBE3A,PBX2,EPHA2,FGF12,EVC,NNAT,HEY2,RTN4R,ZFP36L1,ITGA11,SIX4,RELN,PAFAH1B1,BTG2,NRCAM,ATN1,ATP2B2,RUNX1,BCL11…	869	22.36
GO:0051234	PLDN,CLCN6,SEC23A,PSCD3,SCN4B,BTBD10,ATP7B,SH3BP4,SEC61A2,NPEPL1,COG2,GABRB1,SORBS1,SORT1,PREB,SYT7,GOLGA3,AP2A1,STX2,KCNK12,GABRA4,RANBP2,PITPNB,NBEA,NTN1,XPO1,SLCO5A1,SYPL2,ITSN1,GLTP,NXF1,TXLNA,GABRE,TRIM36,LDLR,KHSRP,IPO9,CAV3,ATP10D,WNK4,SLC37A1,ATP2B1,COL10A1,PRKAA1,IGF2R,KCNAB1,RER1,CLIC2,EDA,DDX19B,SYT2,KPNB1,SLC26A9,LRP6,SLC25A22,KCNMB2,SCN2B,CYB5B,ABCC9,KCNT1,ARF4,SLC25A45,FYCO1,VPS4B,R…	846	21.77
GO:0048856	SOST,KRT34,EYA4,CD4,TGFB3,EXTL1,RORB,PCDHA10,VAV3,FGFR1,BCL3,LTA,COL1A1,KAL1,SLIT3,NTRK3,CLASP1,KCNQ4,COL15A1,NR2C2,WHSC1,CAPN3,PURB,NOV,CD2AP,RND1,LIF,HAND2,NPTX1,EFNB3,PRX,SEMA6B,SEMA3B,KLF10,ADRBK1,ANK1,SIAH1,NAB1,CCM2,KRT3,ID4,SCMH1,IL1RAPL2,UPK1B,MIB1,CCNF,PPARA,INSR,HOXA4,ANKH,ALPK3,GNAO1,LMO4,DPYSL5,FOS,MAFG,DVL3,ONECUT1,MEF2D,ESR1,PAX8,EREG,NR2F6,ZEB2,RPS6KA3,UBE3A,FGF12,EVC,NNAT,HEY2,RTN…	788	20.28
GO:0048869	RUNX3,CD4,TFAP2C,DLX1,RORB,FGFR1,BCL3,TLN2,LTA,NANOS2,GOPC,KAL1,ZAK,SLIT3,NTRK3,HOOK1,COL15A1,TRIB3,PURB,PDCD10,EIF5A2,FUSIP1,CD2AP,CAV1,RND1,LIF,PAK7,HAND2,EFNB3,SEMA6B,EIF2S2,TNFAIP3,SEMA3B,KLF10,SIAH1,NAP1L5,NAB1,KIAA1967,CCM2,MAP3K11,KRT3,MYBL2,EIF4G3,CHAF1A,FAIM,RABEP1,HIPK2,ID4,UPK1B,MIB1,SFRS5,CD28,ETV6,INSR,SH3KBP1,GNAO1,HSPA2,DPYSL5,MAFG,PRKCE,STRBP,ONECUT1,PAX8,EREG,NR2F6,ZEB2,MYST4,HEY…	754	19.4
GO:0007049	CLASP1,CCNK,ILF3,SEPT8,POLS,CDC34,CDCA8,SIAH1,MAP3K11,CDC27,CTCF,MYBL2,CHAF1A,HIPK2,CCNF,UBE2I,CDK2AP1,CD28,CDKN2D,CYLD,HSPA2,ESR1,SASH1,EREG,CLIP1,EML4,PAFAH1B1,TGFB1,ERF,SUV39H2,EXT1,MCC,HCFC1,ESCO1,SEPT6,MYH10,MAPRE3,RNF2,TGFA,APC,RBM7,UHRF1,NEK3,FGF9,VEGFB,LLGL2,MAPK6,CDKN2B,FAM33A,SPECC1L,PTCH1,IL1A,PPP3CB,STAG1,CDK8,RBBP6,CASP3,HDAC9,GSPT2,PTMA,STARD13,CCNE2,PNN,E2F7,SEPT4,GAS7,PIN1,MAPRE1,…	312	8.03
GO:0009058	BACE2,MAN1A2,EIF4A2,STARD3,CD276,BCAT1,ATP6V1A,MTFMT,SCD,STAT5B,NFE2L1,NDST1,GPAM,GLT25D2,ST8SIA1,GPD1,PRKAG2,B3GAT1,CLN8,AZIN1,HMGCR,EDN1,ST3GAL6,EIF2B1,LARGE,EIF4E3,SERP1,SLC6A3,SEC14L2,QKI,PISD,PIGQ,DGAT2L4,FURIN,LPGAT1,GPHN,NMT1,B3GNT5,MARS2,MRPS10,TIA1,PNPO,DBH,SLC25A10,PRKAB2,CD86,UPF1,GALNT10,GCH1,GLUL,INHBB,EEF1A1,MOCS2,GALNAC4S-6ST,GAL3ST3,ACACB,SHANK3,RPN1,EIF4EBP2,RPL15,SCP2,CEBPG,ST3G…	304	7.82
GO:0008104	RAB8A,NAGPA,AP1GBP1,SCAMP1,RAB38,CD81,IPO8,PEX13,BET1L,STX1A,CHMP2B,ARF3,RAB10,RAB6A,GORASP1,AP2B1,BCAP29,STXBP3,GGA2,LIN7C,DUSP16,KIF13A,KCTD7,ICMT,AKAP7,STX16,YWHAB,NUP210,KPNA6,ARF6,VTI1A,GOSR2,NECAP1,RAB13,RAB39B,NXT2,NUP43,CLTC,ATG4B,ALS2CR2,AP3S2,TNPO3,XPO7,SLC26A6,STX11,CADPS2,BACE2,COPA,ARF1,PDCD6IP,G3BP2,ERP29,ABCB9,PPP2CA,RAB31,STXBP1,HSPG2,RAB5B,SRP54,RAB2B,RFFL,BCL6,RAB11FIP1,RAB24,VP…	278	7.15
GO:0006950	RAD23A,SMAD7,TFPI,DCBLD2,TOLLIP,GPX4,TP53INP1,UBE2B,MAPK1,XRCC6BP1,SGK3,ERCC6,MAP4K3,CCR7,TLR10,GRHL3,HNF4A,CROP,NFKB1,HSPA4,IL1R1,BRSK1,IL10RB,TIRAP,HDAC4,TP53,RPS6KA5,INS,PDIA5,BCL3,TLK2,APOA4,ZAK,NTRK3,CXCL14,PRKRIR,POLS,STK39,ERCC4,TRHDE,CHAF1A,HIPK2,OXR1,HSPA2,REG3G,FOS,CHST2,EREG,PECAM1,ENTPD1,ADRA2A,F3,RELN,BTG2,RUNX1,TGFB1,SUPT16H,VPS45,POLD3,CXCL12,BMPR1B,MYH10,POLQ,ATRN,BRCC3,MAP3K5,NON…	275	7.08
GO:0008283	B4GALT7,CDV3,SPOCK1,JAG1,PTCH1,CD81,BTLA,IL1A,ADRA1B,NOX4,WIT1,TDGF1,CASP3,TBX5,EHF,KLF4,IRS2,MAPRE1,VIP,GNAI2,FRAT2,FGF7,BNC1,ODZ1,HOXD13,RACGAP1,PDGFD,PROK1,PTK2B,HBEGF,CDKN1C,ERBB4,APPL1,IL28RA,OSM,DLG5,CDK6,RBBP4,CTNNB1,EPHB4,FRS2,TFDP1,IGF1R,JARID2,CUL2,CD276,BCAT1,CCND3,CHERP,STAT5B,BCL6,PDGFRA,IFNAR2,EMP1,IRF2,JAG2,ACVR2A,FGF5,PPP1CB,ST8SIA1,CDC6,PDGFB,EDN1,RBPJ,MNT,SHB,CDKN1A,SMAD3,ELF4,T…	270	6.95
GO:0007155	HNT,RND1,NRXN3,NID2,CDH24,LMO4,FLRT3,SIRPA,CD209,ZEB2,KIRREL,PECAM1,MYOM3,ENTPD1,ITGA11,RELN,NRCAM,EFS,PXN,ROR2,THRA,SOX9,FZD3,CXCL12,BMPR1B,PCDH10,NRXN1,PCDHA7,EFNB1,CLDN11,PAPLN,APC,PPFIA1,ITGA6,OPCML,HES5,ROBO1,LMLN,RGMB,IGSF1,RAC1,ADAM22,TNN,VCL,DSCAM,HAPLN1,DLC1,SPOCK1,LAMC2,SNIP,OLR1,CD97,TRPM7,PNN,CD9,PCDHA5,SEMA5A,ITGA4,NCAM1,NCAN,ABL2,PCDH17,PCDHAC1,COL6A3,CELSR2,PCDHGA3,CD47,PTK2B,LOXL2…	259	6.66
GO:0016265	DPF2,CARD10,PMAIP1,PURA,TAOK2,NOTCH1,BRCA1,NTF3,SEMA6A,MBD4,GRIK2,BDNF,TNFRSF21,TEGT,TNFRSF1B,EIF4G2,NTN1,TRAF5,MAP3K1,UNC5D,BMF,PTGER3,STK4,ATXN1,BTG1,PRKAA1,AHR,NGFR,SPHK2,PROC,P53AIP1,CUL5,HPRT1,PRKCG,APP,VEGFA,CECR2,BCL2L1,ACTN4,PDE1B,MITF,EDAR,TRAF3,EIF2AK3,FASLG,PCBP4,RASA1,YWHAZ,ADRA1A,IGF1,JMY,FAM130A1,PDCD4,CRTAM,CUL3,BAG2,PPM1F,UNC13B,SIRT1,P2RX1,SOCS3,ABL1,SERINC3,HMGB1,ACVR1,CUL4A,TNF…	255	6.56
GO:0050877	PDCL,CNTNAP2,SLC5A7,BSN,SLC6A1,CHML,DHRS3,POU4F1,NOVA1,RHO,COL11A2,YWHAG,PDYN,CACNA1A,GRIA1,EYA3,THRB,SLIT2,RS1,SCN11A,TGFBI,SLC1A2,NTF3,NRXN2,HRH3,GRIK2,CHRNA4,GNB1,EDNRB,BDNF,PLDN,SPRY2,SCN4B,GRM8,CDH23,ATRX,TBL1X,SIX3,EYA1,KCNMB2,RGS16,SCN2B,PAX2,KRAS,TPH2,EGR2,CNGB3,HPRT1,APP,SLC12A2,OPRM1,TMIE,PNOC,ROM1,ABAT,MITF,CLRN1,EIF2AK3,RAB14,DRD2,DOC2A,KCNIP1,ELOVL4,IGF1,PXK,DIAPH1,SPTBN4,KCNA1,P2RX1…	211	5.43
GO:0009056	LPL,USP21,CUL2,USP44,BCAT1,USP14,AXIN1,PLCB1,ANKIB1,HK2,USP37,DLAT,BTRC,FBXL7,GPD1,CLN8,FBXL12,C14orf126,SLC6A3,DDAH1,UBE2L3,UBE4A,DBH,FZR1,USP42,PSMA1,USP12,UPF1,GCH1,PRIMA1,FBXO11,FRAP1,USP3,BAD,UBE2D3,ZHX2,SIAH2,SMPD3,GLS,TROVE2,DUOX1,USP10,GLUD1,USP33,USP49,UBE2D1,PCCB,CHFR,ACLY,UHRF2,ANAPC4,N-PAC,PDE5A,UBE2H,CYP46A1,PLA2G4F,PTER,PDE4D,ADAMTS14,USP31,PLA2G2F,FUCA1,USP24,RBX1,USP47,LIPG,ARIH2,…	181	4.66
GO:0065009	IFT57,FGD1,NCSTN,SERINC1,GDI2,TBC1D14,APAF1,BAK1,MAP3K13,SMAD2,DGKI,ADCY7,MDFIC,GALR1,TP53,GABBR1,DGKD,INS,CD4,VAV3,ZAK,ADORA2B,TRIB3,CCNK,TBC1D12,CAV1,MAP3K7,MAP3K11,HIPK2,ARFGAP3,DGKG,CENTG1,CDKN2D,CENTD1,TBC1D4,EREG,ADRA2A,DGKB,RELN,TGFB1,RUNX1T1,MET,TRIB1,DDEF2,MAP3K5,FGD6,EDNRA,LAX1,ADRB1,CRHR1,ARFGAP1,ATP7A,GRM7,TBC1D19,CDKN2B,CD81,TDGF1,CASP3,GIT2,CCNE2,TLR4,CYCS,HRBL,GNAI2,TBC1D10C,PCSK9,…	173	4.45
GO:0051674	MAPK14,NTN1,CHL1,MAP3K1,MSN,BTG1,NEUROD4,CTGF,NGFR,LRP6,MYLIP,PEX5,PAK4,APP,CEACAM1,CAPZA1,VEGFA,PLXNA3,ACTN4,PRKG1,NF1,MTSS1,CAP1,IGF1,VAX1,ACTG1,PTGS2,ITGA3,ASTN1,ACVR1,PTEN,OTX2,MARCKS,IL10,NEO1,TNF,MKLN1,GNA13,LMX1A,VIM,NRP2,MAP2K1,FOXC1,CNTN4,ARX,POU4F2,ASCL1,NFASC,TGFBR1,KIF5C,ABI2,VAV3,KAL1,SLIT3,CD2AP,EFNB3,SEMA3B,SIAH1,AAMP,TPM3,GNAO1,DPYSL5,ZEB2,PECAM1,ADRA2A,ITGA11,SIX4,RELN,PAFAH1B1,N…	165	4.25
GO:0065008	DDX5,CRIM1,SOCS1,PKD2,DCBLD2,BAK1,WHSC1L1,CCR7,NDRG3,TP53,CTNND1,ATP2C1,PPT1,DGKD,INS,TGFB3,FGFR1,PDIA5,SLC9A1,NOV,CAV1,PRX,NAB1,SLC12A5,ESR1,SLC9A4,NEDD4L,ATP2B2,TGFB1,PDIA3,CAMK2D,KLF6,SRI,CXCL12,CLDN11,IGFBP4,EDNRA,SOCS6,ADRB1,VEGFB,CCL3,ATP7A,TPP1,SFTPC,TRPC6,TNN,PRKCQ,EGLN2,DLC1,ING3,VDR,SLC9A2,IL1A,ADRA1B,CASP3,SERTAD2,AGTR2,CD9,KCND2,PCSK9,SOCS4,CCL1,GLRX,PHF17,HIF1A,GLRX5,OSM,PPARGC1A,IGF…	160	4.12
GO:0009605	STAT5B,BCL6,OPN5,CMTM6,NFE2L1,STC1,ITGA2,NDST1,MGLL,RBM24,PDGFB,MASP1,SHROOM3,ITGB3,FBN1,HDAC5,IRAK2,CYR61,LECT2,INHBB,CMTM4,FRAP1,F13A1,SMAD1,ABHD2,CD59,RHO,THBS1,CACNA1A,PARG,IL16,NFX1,IL2RA,SLIT2,PROCR,SEMA3A,RALA,TNFRSF1B,ROBO2,SYT7,MAPK14,CHST1,MAP3K1,CTGF,NGFR,PROC,CCL7,FADS1,BMP6,EGR2,SLC12A2,VEGFA,PLXNA3,MDK,PPARG,ITCH,PLAA,SCUBE1,PTGS2,ADM,STC2,RTN4RL1,ACVR1,TRPC3,TULP4,FOSL1,IL10,GNA13,…	147	3.78
GO:0006955	CBLB,PSMB8,SEMA7A,TOLLIP,PVRL1,CD3E,CCR7,TLR10,NFKB1,IL1R1,IL10RB,TIRAP,CHUK,CD4,BCL3,LTA,CXCL14,LIF,MARCH8,MAP3K7,PSME1,CD28,RNF125,CD209,EREG,ENTPD1,F3,CD83,CLEC5A,RGS1,TGFB1,IL12A,PIK3R1,PAWR,CXCL12,LAX1,CRHR1,CCL3,POLL,BTLA,IL1A,IL13,OLR1,CD97,TLR4,CCL22,IRF4,ODZ1,CCL1,LY75,CD24,IKBKAP,UBE2N,ALCAM,OSM,OAS3,YY1,CD72,SARM1,CD276,RFX1,CCL20,BCL6,IRF2,DDX58,RBM24,IKBKE,MASP1,SMAD3,CD164,DBH,SP2,C…	120	3.09
GO:0006807	EIF2AK4,SOCS1,SLC7A1,KITLG,SNCB,PDGFA,MGAT1,FOXC1,CD3E,GCNT2,UAP1,INS,CD4,GLUD2,OAZ1,AMD1,GALNS,CAV1,B3GALT6,XYLT1,CHST2,ETNK1,RELN,ATP2B2,CARS,EXT1,IL12A,GATM,SLC7A6,GNS,B4GALT7,CD81,AMT,GLDC,TDGF1,WARS2,HS2ST1,PTOV1,GNPDA1,ALDH5A1,B3GAT3,SHMT1,PDGFD,GOT2,MAT1A,SGPP1,XPNPEP1,PPP2CA,BCAT1,P4HA1,SLC7A2,PDGFB,AZIN1,ST3GAL6,LARGE,C14orf126,SLC6A3,DDAH1,MARS2,CLCF1,DBH,EXTL2,GCH1,GLUL,OAZ2,GAL3ST3,NR…	111	2.86
GO:0042221	OXR1,HSPA2,NEDD4L,SST,RAB6C,CXCL12,CCL3,ASNA1,ATP7A,ROBO1,ADIPOR2,HIATL1,IL1A,ADRA1B,SYT1,CYGB,CCL22,GNAI2,CCL1,DUSP1,EIF2B3,PON1,SLC25A12,PPP2CA,CCL20,CMTM6,STC1,EIF2B1,DNAJB5,SCRT2,GRIN1,DBH,CCND1,TTN,CYR61,LECT2,CMTM4,FRAP1,SHANK3,NDUFS4,CALCR,LYN,COLEC12,LATS2,ERO1L,DUOX1,IL16,BCL2,SLIT2,SCN11A,PMAIP1,SEMA3A,GRIK2,ALS2,ARNT2,RALA,ATP7B,TNXB,ROBO2,DNAJB1,MAPK14,OXSR1,TOR1B,AHR,KCNMB2,CCL7,UCP3…	110	2.83
GO:0006952	TOLLIP,BECN1,CCR7,TLR10,ITK,NFKB1,IL1R1,IL10RB,TIRAP,HDAC4,STAB2,INS,BCL3,ADORA2B,LYST,CXCL14,REG3G,FOS,CHST2,EREG,CD83,ZNF148,CLEC5A,TGFB1,VPS45,CXCL12,BMPR1B,ATRN,SOCS6,CCL3,RAC1,BNIP3L,CD81,IL1A,IL13,NOX4,HDAC9,OLR1,CD97,TLR4,CCL22,CCL1,GATA3,NR3C1,LY75,ZFP36,IL28RA,SARM1,F8,CD276,CCL20,STAT5B,BCL6,NFE2L1,NDST1,MGLL,DDX58,RBM24,TIAL1,RBPJ,MASP1,HDAC5,IRAK2,INHBB,CEBPG,COLEC12,SMAD1,CD59,THBS1,…	97	2.5
GO:0009719	SMC1A,RAD23B,PPP1CB,LBA1,POLH,EIF2B1,PRPF19,UBE2V1,ALKBH1,PTPN11,TDG,UPF1,RECQL,EPC2,CALCR,CEBPG,LYN,COLEC12,MSH2,FANCM,PARG,LATS2,TLK1,BCCIP,BRCA1,MRE11A,MBD4,NEK11,ATRX,WRNIP1,MAPK14,FANCF,RBX1,SMC5,CRY2,PRKCG,DCLRE1C,ADIPOR1,PCBP4,RUVBL2,DTL,RAD1,SMC3,RAD9B,ABL1,HMGB1,CUL4A,POLI,WDR33,GCLC,RAD21,UBE2V2,RPA1,RAD23A,UBE2B,MAPK1,XRCC6BP1,ERCC6,BRSK1,TP53,ME1,BCL3,TLK2,ZAK,POLS,ERCC4,CHAF1A,HIPK2,…	95	2.44
GO:0051301	PRC1,STAG2,CENPJ,MAP9,CDK4,CECR2,CIT,WEE1,RCC2,BIN3,CDC42,TOP1,RASA1,CCNT2,SMC3,CDK2,PPP1CC,CDC7,BMI1,RAD21,EVI5,CDC40,CCNG2,CCND2,CDC25B,CABLES2,SEPT11,CD4,CLASP1,CCNK,POLS,CDCA8,CCNF,UBE2I,PAFAH1B1,SEPT6,MYH10,RAB35,MAPRE3,NEK3,LLGL2,FAM33A,SPECC1L,STAG1,CDK8,DIAPH2,CCNE2,SEPT4,MAPRE1,SENP5,CDC37L1,CDC23,RACGAP1,ZZEF1,WNT3A,RCC1,DSTN,CETN2,CDK6,SEPT2,CDC2L6,CCND3,SMC1A,TACC1,PPP1CB,CDC6,RASGEF1…	87	2.24
GO:0007610	ANKH,GNAO1,MAFG,RELN,ATP2B2,RUNX1,MET,CXCL12,CRHR1,CCL3,ROBO1,RASD2,IL1A,ADRA1B,AGTR2,NPAS2,CCL22,CCL1,GRM5,NPY1R,OSM,CCL20,TMOD2,CMTM6,ACVR2A,GRIN1,PSEN1,CTNND2,DBH,CYR61,LECT2,CMTM4,GRM1,POU4F1,NOVA1,CACNA1A,GRIA1,IL16,SLIT2,SEMA3A,ALS2,CHRNA4,BDNF,RALA,IL1RAPL1,ROBO2,CDH23,MAPK14,CHL1,ACSL4,CCL7,CNR1,FOSB,EGR2,HPRT1,MBD2,APP,ITGA5,VEGFA,PLXNA3,OPRM1,ABAT,PDE1B,GRIN2A,ITGA3,ASTN1,BRUNOL6,CELSR1…	86	2.21
GO:0019953	HSPA2,STRBP,EREG,PAFAH1B1,ZNF148,CDYL,TGFB1,BMPR1B,CLDN11,ADAMTS1,BCL2L2,DAZAP1,ZPBP2,DIAPH2,GPR64,NEURL,CD9,GNPDA1,RACGAP1,USP9Y,TESK2,ABCB9,AXIN1,BCL6,RAD23B,JAG2,ACVR2A,HMGCR,HOXA10,QKI,PGR,SLC2A3,CEP57,PPAP2B,DZIP1,SMAD1,TUBD1,FOXJ1,SPATA2,WNT1,TRIM36,BTG1,OVOL1,TCFL5,CUGBP1,NRIP1,TSSK2,PAX5,GMCL1,MAK,TBPL1,BOLL,ADCYAP1R1,BMP4,SIRT1,RPS6KB1,SPIN3,CDC7,ACVR1,BRUNOL6,YBX2,AFF4,WDR33,HRB,USP9X,P…	80	2.06
GO:0001775	EFNB1,LAX1,ZNF3,CD81,BTLA,PPP3CB,NLRC3,CASP3,HDAC9,TLR4,CD9,EGR1,IRF4,AICDA,CD276,CCND3,STAT5B,BCL6,JAG2,RBPJ,SHB,SMAD3,ELF4,MYH9,CLCF1,HDAC5,CD86,ITPKB,SKAP2,BAD,CEBPG,MSH2,TXNDC1,ICOSLG,IL2RA,WWP1,IGBP1,TPD52,POLM,HPRT1,DCLRE1C,SOCS5,KIF13B,PAG1,RAG1,CPLX2,RC3H1,CD3G,IL10,NCK2,GNA13,SP3,CBLB,CBFB,TOLLIP,CD3E,HDAC4,INS,CD4,BCL3,MAP3K7,CD28,BCL11A,TGFB1,IL12A,PIK3R1,PAWR,KLF6	68	1.75
GO:0022414	BMPR1A,OSR1,MBD2,APP,CEACAM1,NRIP1,NCOA4,EIF2AK3,ITCH,LNPEP,SIRT1,ADM,XDH,NHLH2,PCYT1B,NFIA,CTBP2,WNT4,PVRL1,FOXC1,MDFIC,CD4,CLIC5,P11,HIPK2,CD28,INSR,CD209,EREG,ATP2B2,ROR2,HCFC1,BMPR1B,FGF9,CRHR1,ADAMTS1,CCL3,BCL2L2,CD81,PAPPA,NEURL,NR3C1,THBD,IGF1R,STAT5B,ACVR2A,HMGCR,PGR,DBH,INHBB,KLF9,CTBP1,HPGD,AR,B4GALT1,DMRT3,FKBP4,TAF4,TEAD3,TNIP1,BCL2,WWP1,PMAIP1,NRAS,ATP7B,TFCP2L1	66	1.7
GO:0009607	IFNAR2,DDX58,RBPJ,DNAJB5,HSPA5,CCND1,NR4A2,COLEC12,PRRT2,STAT2,PARG,ERO1L,TBK1,BCL2,MAPK11,IGBP1,TNXB,DNAJB1,MAPK14,TOR1B,CCL7,EIF2AK3,PAG1,HSPA8,CRTAM,NFE2L2,PRKRA,SLC11A1,FOSL1,IL10,TNF,TXNDC4,CREBL1,BECN1,CCR7,NFKB1,HSPA4,STAB2,BCL3,ABCE1,HSPA2,ENTPD1,IL12A,CXCL12,CCL3,BNIP3L,IL13,TLR4,CREBZF,CCL22,IL28RA,ALCAM,YY1,CD72,CCL20	55	1.42
GO:0008015	ADRA1B,OLR1,AGTR2,NPY1R,HBEGF,ADRB2,LPL,SP4,SLC8A1,ATP1A2,DES,EDN1,DBH,ACTC1,SCN5A,SLC12A6,HOXB2,THRB,CHGA,EDNRB,KCNMB2,MTHFR,EPB41,ADRB3,DLL4,PTGS2,ADM,GCLC,ECE2,TBC1D8,KCNJ12,KCNIP2,HCN4,INS,APOA4,CAV1,ADRBK1,GNAO1,THRA,COL3A1,SRI,CXCL12,ELN,EDNRA,ADRB1,CUGBP2	46	1.18
GO:0009628	OPN5,SMC1A,TP53BP2,CLOCK,EIF2B1,DBH,MSH2,RHO,ICOSLG,ERO1L,BCL2,MBD4,NGFR,EGR2,APP,SLC12A2,DCLRE1C,BCL2L1,CSDA,PDE1B,SNN,ADRB3,TRPC3,GCLC,UBE4B,CIRBP,PKD2,BRSK1,TP53,ZAK,PRX,NR2F6,ATP2B2,BRCC3,ADRB1,ADRA1B,CASP3,REV1,TRPA1,EIF2B3,GUCA1B,OSM,ADRB2	43	1.11
GO:0006936	KCNJ12,KCNIP2,HCN4,CNN3,PPP1R12A,TPM3,GNAO1,GJA5,SRI,EDNRA,SCN4A,TRDN,VIP,HRC,TNNI1,GJA1,ADRB2,SLC8A1,ATP1A2,SLC6A8,DES,DAG1,ASPH,UTRN,EDN1,SNTA1,P2RXL1,ACTC1,TTN,PPP1R12B,SCN5A,SLMAP,CALD1,MYH11,PDE4D,KCNMB2,PRKG1,SNTB1,ADRA1A,KCNA1,DMD,KCNMA1,DTNA	43	1.11
GO:0048771	SOST,KLF10,NAB1,ANKH,TGFB1,THRA,SPARC,TPP1,ADRA1B,ITGA4,CTNNB1,ADRB2,CD276,BMP3,CDH11,DBH,BMP1,CALCR,DMP1,GLI2,TOB1,RUNX2,SORT1,HOXA3,CTGF,SP7,KL,BMP6,EIF2AK3,CSF1,FGF18,BMP4,AXIN2,BMP8A,ACVR1,BMP2,CBFB,FOXC1	38	0.98
GO:0021700	RUNX2,BARX2,MYH11,NOTCH1,APP,ACTG1,PTGS2,GATA2,ADAM12,CDH5,AGRN,TMOD1,CBFB,KCNIP2,FGFR1,RND1,EREG,NRCAM,MYH10,HES5,CTNNB1,CDON,PGR,MYH9,PSEN1,TTN,RET,RECK,CACNA1A	29	0.75
GO:0006403	KHDRBS1,POM121,NUDT4,SRrp35,FUSIP1,CKAP5,BICD1,FMR1,SMG7,RBM8A,SMG5,NUP210,NXT2,G3BP2,CASC3,THOC2,QKI,NXF5,UPF1,HUWE1,RAN,RNUXA,NUP160,XPO1,NXF1,KHSRP,DDX19B,HRB	28	0.72
GO:0050878	F13A1,CD59,THBS1,PROCR,PROC,SCUBE1,GNA13,F7,TFPI,HNF4A,IL10RB,ENTPD1,F3,NEDD4L,CD9,VIP,SERPINE1,GUCA1B,FBLN5,THBD,COPA,F8,ITGA2,EDN1,ITGB3,FBN1	26	0.67
GO:0001816	TLR4,IRF4,CD276,STAT5B,BCL6,TIA1,DBH,CD86,INHBB,CEBPG,MAF,ICOSLG,CRTAM,IL10,NFKB1,INS,CD4,BCL3,MAP3K7,CD28,EREG,PAWR,ASB1	23	0.59
GO:0050817	F13A1,CD59,THBS1,PROCR,PROC,SCUBE1,GNA13,F7,TFPI,HNF4A,IL10RB,ENTPD1,F3,CD9,SERPINE1,FBLN5,THBD,F8,ITGA2,ITGB3,FBN1	21	0.54
GO:0051606	NGFR,KCNMB2,SLC12A2,KCNIP1,CRTAM,TRPC3,PKD2,KCNIP2,PPEF2,NR2F6,ATP2B2,SYT1,TLR4,GUCA1B,OPN5,RHO,PARG	17	0.44
GO:0007588	KCNJ1,NEDD4L,CLCN5,KCNK5,VIP,NFAT5,GUCA1B,COPA,EDN1,AQP1,NR3C2,UNC13B,ADM,AQP4,AQP2,ADORA2B	16	0.41
GO:0008037	ZPBP2,CDK5R1,CNTNAP2,COLEC12,SLIT2,BDNF,APP,CRTAM,CNTN4,HNT,EFNB3,CD209,PECAM1,NRCAM,OPCML	15	0.39
GO:0007059	POLS,UBE2I,STAG1,ARL8B,CDC23,SMC1A,PSEN1,NEK6,NCAPD3,BRCA1,STAG2,SMC3,ARL8A,RAD21,RIOK3	15	0.39
GO:0007586	ADAMTS3,MMP16,SST,VDR,ACSL1,PPARGC1A,COPA,UCN2,LDLR,ADAMTS14,MMP13,MMP11,LEP,GALR1	14	0.36
GO:0051235	ATP7B,MXI1,KDELR3,IL10,BCL3,GOPC,PDIA3,SRI,G3BP2,IHPK1,MDFI,SUPT7L	12	0.31
GO:0035264	ATRN,ADRB1,PTCH1,NPY1R,ADRB2,STAT5B,DLG1,HOXA5,APP,IGF1,ADRB3,CSF1	12	0.31
GO:0048589	NTRK3,EREG,BMPR1B,PSEN1,DMBX1,GLI2,NOTCH1,APP,PTGS2,RTN4RL1,COL4A4,AGRN	12	0.31
GO:0007585	ELN,EDNRA,SFTPC,TRAF4,ATP1A2,EDN1,CFTR,UCP3,HNMT,MAFB	10	0.26
GO:0006914	BECN1,ATG16L1,GOPC,MAP1LC3B,ATG12,ATG5,ATG4B,RAB24,MAP1LC3A,ATG9A	10	0.26
GO:0022406	CPLX2,SNAP25,VPS45,EXOC5,SNPH,STXBP3,VAMP3,YKT6,STXBP1,PLDN	10	0.26
GO:0044419	EDN1,TNIP1,WWP1,PMAIP1,EIF2AK3,ITCH,PVRL1,HIPK2,CD209,CD81	10	0.26
GO:0007568	NOX4,LOXL2,MNT,MSH2,MORF4L1,KL,PDCD4,TBX2,TP53	9	0.23
GO:0007623	NR2F6,EGR3,NPAS2,PER2,CLOCK,NR1D1,CRY2,PER1	8	0.21
GO:0044236	ADAMTS14,MMP13,ADRB3,MMP11,ADAMTS3,MMP16,ADRB1,ADRB2	8	0.21
GO:0050879	POU4F1,CACNA1A,APP,BRUNOL6,ATP2B2,MYH10,TPP1	7	0.18
GO:0042303	PSEN1,ACVR1B,BARX2,NOTCH1,TGM3,PTGS2,FOXQ1	7	0.18
GO:0051705	MBD2,APP,PHF21A,NHLH2,ACVR2A,DBH,POU4F1	7	0.18
GO:0051716	FADS1,NUAK2,PCSK9,EIF2B3,EIF2B1	5	0.13
GO:0050886	ADRB3,ADRB1,ADRA1B,AGTR2,ADRB2	5	0.13
GO:0019748	UROD,NFE2L1,DHRS3,ALAD	4	0.1
GO:0019882	CD209,FLJ45422,PSMB8	3	0.08
GO:0009292	SMC3	1	0.03
GO:0000280	RFT1	1	0.03
GO:0035265	ADRA1B	1	0.03
GO:0015979	RAPGEF5	1	0.03
GO:0048066	EDNRB	1	0.03
GO:0000746	CD4	1	0.03
GO:0030431	NPAS2	1	0.03
